# Supplementary material for: Unveiling molecular signatures of preeclampsia and gestational diabetes mellitus with multi-omics and innovative cheminformatics visualization tools
Source: Royal Society of Chemistry journal article supplement (doi:10.1039/d0mo00074d), 2020-09-08
Supplement: d0mo00074d2.xlsx [file d0mo00074d2.xlsx]

## Sheet: Table S1- Clinical Information
Disease Group	Patient ID	Age (years)	Ethnicity	Marital Status	Occupation	Education	Income	Type 1 Diabetes	Type 2 Diabetes	History of Myocardial Infarction	Chronic Hypertension	Cardiac Disease	Gravida	Parity	Preterm Birth in Prior Pregnancy	Spontaneous Abortion in Previous Pregnancy	Living Children	Gestational Age at Prenatal Visit (wks)	Total Prenatal Visits	Medications at time of conception	Prenatal vitamins	Prescribed Medications	Smoking	Alcohol Use	Drug Use	Marijuana Use	Cocaine Use	Methadone Use	Heroin Use	Methamphetamine Use	IUGR	Premature Rupture of Membranes	Intrapartum Medications	Baby number	Combined Medications	Systolic Blood Pressure (SBP)	Diastolic blood pressure (DBP)	BMI	CAT Scan	Gonorrhea/Chlamydia	Chorioamnionitis	Bacterial Vaginosis	Other Infections	Gestational diabetes	Preeclampsia	Gestational Hypertension	Mg2SO4 treatment	Type of Labor	Date of Labor
Control	TAM_10	36.4658	Hispanic	Married		Some college	<$34,999	No	No	No	No	No	4	2	No	Yes	2	15	9	acyclovir, cephalexin, PNV, tylenol, valacyclovir	Yes	Yes	No	No	No	No	No	No	No	No	No	No		1	cefazolin, famotidine, sodium citrate-citric acid	119	59	33.2	No	No	No	No	Yes	No	No	No	No	No Labor
Control	TAM_106	20.9479	Hispanic	Single- never married	hw	High school/GED	<$34,999	No	No	No	No	No	3	1	No	Yes	1	17	11	azithromycin, metronidazole, PNV	Yes	Yes	No	No	No	No	No	No	No	No	No	No		1	famotidine, fentanyl, oracit, oxytocin, Penicillin	121	65	30.6	No	No	No	Yes	Yes	No	No	No	No	Induced
Control	TAM_109	28.3233	Hispanic	Married		Less than high school	<$34,999	No	No	No	No	No	3	1	No	Yes	1	10	13	nitrofurantoin, PNV, synthroid	Yes	Yes	No	No	No	No	No	No	No	No	No	No		1	fentanyl	138	51	33.2	No	No	No	No	Yes	No	No	No	No	Spontaneous	2011-09-02
Control	TAM_111	33.1644	Black	Single- never married		High school/GED	<$34,999	No	No	No	No	No	3	2	No	No	2	10	13	cephalexin, nitrofurantoin, nystatin, PNV, promethazine, terconazole, tylenol #3, zofran	Yes	Yes	No	No	No	No	No	No	No	No	No	No		1	cefazolin, famotidine, oracit	134	73	30.7	No	No	No	No	Yes	No	No	No	No	No Labor
Control	TAM_116	26.2055	Hispanic	Married	none	High school/GED		No	No	No	No	No	1	0	No	No	0	11	11	FERROUS SULFATE , metronidzaole, nitrofurantoin, PNV, reglan	Yes	Yes	No	No	No	No	No	No	No	No	No	No		1	oxytocin, SODIUM CITRATE-CITRIC ACID	109	71	34.3	No	No	No	Yes	Yes	No	No	No	No	Spontaneous: Augmented	2011-09-06
Control	TAM_120	32.7315	Hispanic	Married	Nil	Less than high school	<$34,999	No	No	No	No	No	5	4	No	No	4	9	12	pnv	Yes	No	No	No	No	No	No	No	No	No	No	No		1		117	65	24.6	No	No	No	No	No	No	No	No	No	Spontaneous	2011-09-06
Control	TAM_123	29.0493	Black	Married		Some college	$35,000 - $74,999	No	No	No	No	No	4	3	No	No	3	24	6	iron, metronidazole, nitrofurantoin, terconazole	No	Yes	Yes	No	No	No	No	No	No	No	No	No		1	fentanyl, Penicillin	134	73	35.2	No	No	No	Yes	Yes	No	No	No	No	Spontaneous	2011-09-06
Control	TAM_124	32.7233	Hispanic	Single- never married		High school/GED	<$34,999	No	No	No	No	No	3	2	Yes	No	2	9	10	CEFPODOXIME, PNV	Yes	Yes	No	No	No	No	No	No	No	No	No	No		1	bicitra, cefazolin, famotidine	116	71	37.6	No	No	No	No	No	No	No	No	No	No Labor
Control	TAM_125	35.0438	Hispanic	Married				No	No	No	No	No	6	5	2	No	5	13	17	17OHP, ambien, azithromycin, cephalexin, famotidine, ferrous sulfate, phenergan, prenatal vitamins, tylenol #3, zofran	Yes	Yes	No	No	No	No	No	No	No	No	No	No	acetaminophen, penicillin	1	cefazolin	129	79	47.2	Yes	No	No	No	Yes	No	No	No	No	Spontaneous	2011-10-12
Control	TAM_127	30.9589	Hispanic	Married		Less than high school	<$34,999	No	No	No	No	No	4	3	No	No	3	7	11	pnv	Yes	No	No	No	No	No	No	No	No	No	No	No		1	cefazolin, famotidine, SODIUM CITRATE-CITRIC ACID	96	56	32.9	No	No	No	No	No	No	No	No	No	No Labor
Control	TAM_129	29.9534	Hispanic	Married	Housewife	High school/GED		No	No	No	No	No	2	1	No	No	1	10	17	iron, PNV, tylenol #3	Yes	Yes	No	No	No	No	No	No	No	No	No	No	morphine, tylenol, vicodin	1	OXYTOCIN	121	76	39.1	No	No	No	No	No	No	No	No	No	Induced
Control	TAM_13	27.2055	Hispanic	Single- never married		Less than high school	<$34,999	No	No	No	No	No	3	2	No	No	2	19	10	ferrous sulfate (1.00), prenatal vitamins (1.00)	Yes	Yes	No	No	No	No	No	No	No	No	No	No		1	fentanyl	119	71	35	No	No	No	No	No	No	No	No	No	Spontaneous	2011-08-08
Control	TAM_139	24.1014	Hispanic	Married		Less than high school	<$34,999	No	No	No	No	No	1	0	No	No	0	10	13	clotrimazole, metronidazole, pnv, Terconazole	Yes	Yes	No	No	No	No	No	No	No	No	No	No		1	fentanyl, SODIUM CITRATE-CITRIC ACID			33.5	No	No	No	Yes	Yes	No	No	No	No	Spontaneous	2011-09-08
Control	TAM_15	33.4986	Asian	Married				No	No	No	No	No	2	1	No	No	0	17	12	ferrous sulfate (1.00), metronidazole, prenatal vitamins (1.00), psyllium seeds, zofran	Yes	Yes	No	No	No	No	No	No	No	No	Yes	No		1	fentanyl, nubain, oxytocin, zofran	97	67	22.2	No	No	No	Yes	No	No	No	No	No	Induced
Control	TAM_150	38.737	Hispanic	Married				No	No	No	No	No	8	4	No	3	4	16	11		No	No	Yes	Yes	No	No	No	No	No	No	No	No		1	fentanyl, oxytocin	116	78	31.6	No	No	No	No	No	No	No	No	No	Induced
Control	TAM_158	33.6548	Hispanic	Married		Less than high school	<$34,999	No	No	No	No	No	4	3	No	No	3	13	11	alburterol, Lutera, PNV, Rhogam	Yes	Yes	No	No	No	No	No	No	No	No	No	No		1	fentanyl	149	86	37.3	No	No	No	No	No	No	No	No	No	Spontaneous	2011-09-11
Control	TAM_172	31.411	Hispanic	Separated	Housewife	High school/GED	<$34,999	No	No	No	No	No	4	2	Yes	No	2	23	9	nitrofurantoin, pnv	Yes	Yes	No	No	No	No	No	No	No	No	Yes	No		1		127	65	25.5	No	No	No	No	Yes	No	No	No	No	Induced
Control	TAM_173	37.6795	Hispanic	Single- never married	none	Less than high school	<$34,999	No	No	No	No	No	4	3	No	No	3	8	8	cephalexin, fluconazole, PNV	Yes	Yes	No	No	No	No	No	No	No	No	No	No		1	fentanyl, nubain, oxytocin	100	65	32.5	No	No	No	No	No	No	No	No	No	Spontaneous
Control	TAM_18	29.3479	Hispanic	Single- never married	none	Less than high school	<$34,999	No	No	No	No	No	5	4	No	No	4	9	12	pnv, promethazine, reglan, terconazole	Yes	Yes	No	No	No	No	No	No	No	No	No	No		1	cefazolin	129	73	35.5	No	No	No	No	No	No	No	No	No	No Labor
Control	TAM_187	25.7233	Hispanic	Married		Less than high school	<$34,999	No	No	No	No	No	4	3	No	No	2	15	10	PNV	Yes	No	No	No	No	No	No	No	No	No	No	No		1	bicitra, oxytocin	115	71	28.7	No	No	No	No	No	No	No	No	No	Spontaneous: Augmented
Control	TAM_188	38.8548	Hispanic	Single- never married		High school/GED	<$34,999	No	No	No	No	No	4	3	No	No	3	18	9	metronidazole, nitrofurantoin, PNV	Yes	Yes	No	No	No	No	No	No	No	No	No	No		1	oxytocin	144	86	25.3	No	No	No	Yes	Yes	No	No	No	No	Spontaneous: Augmented	2014-07-14
Control	TAM_2	22.7288	Hispanic	Married	housewife	High school/GED	<$34,999	No	No	No	No	No	2	1	No	No	1	17	7	flagyl, terconazole	No	Yes	No	No	No	No	No	No	No	No	No	No		1	fentanyl, oxytocin	111	58	22.5	No	No	No	No	No	No	No	No	No	Induced	2011-08-02
Control	TAM_202	30.8466	Hispanic	Married	homemaker	Less than high school	<$34,999	No	No	No	No	No	4	1	No	2	1	14	14	amoxicillin, clotrimazole, metronidazole, nitrofurantoin	No	Yes	No	No	No	No	No	No	No	No	No	No		1	fentanyl, oxytocin, penicillin	131	72	31.6	No	No	No	No	Yes	No	No	No	No	Induced
Control	TAM_203	22.726	Hispanic	Married	restaurant	High school/GED	<$34,999	No	No	No	No	No	3	2	No	No	2	9	12	pnv	Yes	No	No	No	No	No	No	No	No	No	No	No		1	nubain, oxytocin, penicillin, promethazine	113	65	28.3	No	No	No	No	Yes	No	No	No	No	Spontaneous
Control	TAM_21	20.474	Hispanic	Single- never married		High school/GED	<$34,999	No	No	No	No	No	1	0	No	No	0	32	6	PNV	Yes	No	No	No	No	No	No	No	No	No	No	No		1	nubain, pitocin, promethazine	116	70	27.8	No	No	No	No	No	No	No	No	No	Spontaneous: Augmented	2011-08-09
Control	TAM_216	18.9726	Hispanic	Married	none	High school/GED	<$34,999	No	No	No	No	No	1	0	No	No	0	34	5	PNV	Yes	No	No	No	No	No	No	No	No	No	No	No		1	oxytocin	113	77	29.1	No	No	No	No	No	No	No	No	No	No Labor	2011-09-22
Control	TAM_223	34.2192	Hispanic	Single- never married		High school/GED	<$34,999	No	No	No	No	No	2	1	No	No	1	11	14	PNV	Yes	No	No	No	No	No	No	No	No	No	No	No		1		135	88	26.2	No	No	No	No	No	No	No	No	No	Spontaneous: Augmented	2011-09-23
Control	TAM_224	22.0493	N	Married			<$34,999	No	No	No	No	No	1	0	No	No	0	7	8	nitrofurantoin, PNV	Yes	Yes	No	No	No	No	No	No	No	No	No	No		1	fentanyl, oxytocin	119	66	26.7	No	No	No	No	No	No	No	No	No	No Labor	2011-09-23
Control	TAM_228	20.0712	Hispanic	Separated	none	High school/GED		No	No	No	No	No	3	1	Yes	No	1		6	PNV, propylthiouracil	Yes	Yes	No	No	No	No	No	No	No	No	No	No	betamethasone, indomethacin	1		121	79	39.2	No	No	No	No	No	No	No	No	No	No Labor
Control	TAM_233	34.1315	Asian	Married	none	High school/GED		No	No	No	No	No	3	2	No	No	2	18	7	prenatal vitamins	Yes	Yes	No	No	No	No	No	No	No	No	No	No	oracit, penicillin	1				30	No	No	No	No	No	No	No	No	No	Spontaneous: Augmented	2011-10-21
Control	TAM_243	29.4795	Hispanic	Married		Less than high school	<$34,999	No	No	No	No	No	3	2	No	No	2	7	11	cephalexin, claritin, hydrocortison rectal suppository, nystatin-triamcinolone cream, PNV, terconazole	Yes	Yes	No	No	No	No	No	No	No	No	No	No		1	cefazolin, FAMOTIDINE , SODIUM CITRATE-CITRIC ACID	124	80	34.8	No	No	No	No	Yes	No	No	No	No	Spontaneous: Augmented
Control	TAM_244	28.1288	Hispanic	Single- never married	nil	High school/GED	<$34,999	No	No	No	No	No	4	3	No	No	3	11	13	PNV	Yes	No	No	No	No	No	No	No	No	No	No	No		1	oxytocin	131	65	32.7	No	No	No	Yes	No	No	No	No	No	Induced	2011-09-26
Control	TAM_263	31.0192	Black	Married	none	Some college	<$34,999	No	No	No	No	No	5	2	No	2	2	10	8	cephalexin, macrodantin, phenergan, PNV, terconazole vaginal cream, zofran	Yes	Yes	No	No	No	No	No	No	No	No	No	No		1	cefazolin, famotidine, oracit	101	64	31.6	No	No	No	No	No	No	No	No	No	Spontaneous: Augmented
Control	TAM_265	27.3589	Hispanic	Single- never married	cashier	Less than high school	<$34,999	No	No	No	No	No	4	3	Yes	No	3	15	4	naproxen, nitrofurantoin, PNV	Yes	Yes	No	No	No	No	No	No	No	No	No	No		1	cefazolin, famotidine	118	77	35.8	No	No	No	No	Yes	No	No	No	No	Spontaneous: Augmented	2011-10-03
Control	TAM_28	36.6274	Hispanic	Married	none	Less than high school	<$34,999	No	No	No	No	No	9	8	No	No	8	23	8	ascorbic acid, clotrimazole, DIPHENHYDRAMINE, ferrous sulfate, HYDROXYZINE, lindane, nitrofurantoin, permethrin cream, pnv, TRIAMCINOLONE ACETONIDE ointment	Yes	Yes	No	No	No	No	No	No	No	No	No	No		1	fentanyl, oracit	119	74	20.9	No	No	No	No	Yes	No	No	No	No	Spontaneous: Augmented	2011-08-11
Control	TAM_307	28.9781	Hispanic	Married		Less than high school	<$34,999	No	No	No	No	No	3	2	No	No	2	23	4	PNV	Yes	Yes	Yes	Yes	Yes	Yes	No	No	No	No	No	Yes	penicillin	1	ampicillin, fentanyl, penicillin, terbutaline	126	58	38.8	No	No	Yes	No	Yes	No	No	No	No	Spontaneous	2011-10-12
Control	TAM_318	23.8164	Hispanic	Single- never married	none	High school/GED	<$34,999	No	No	No	No	No	4	3	No	No	3	15	11	ferrralet, macrobid	Yes	No	No	No	No	No	No	No	No	No	No	No		1	fentanyl, oxytocin	133	77	30.3	No	No	No	No	Yes	No	No	No	No	Induced	2011-10-10
Control	TAM_332	31.1315	Hispanic	Single- never married	homemaker	High school/GED	<$34,999	No	No	No	No	No	5	3	No	Yes	3	10	5	azithromycin, metronidazole, PNV	Yes	Yes	No	No	No	No	No	No	No	No	No	No		1	cefazolin, terbutaline	109	64	33.3	No	No	No	Yes	No	No	No	No	No	Induced	2011-10-12
Control	TAM_340	33.0411	Hispanic	Married	Medical assistant	High school/GED	<$34,999	No	No	No	No	No	5	4	No	No	4	6	12	PNV	Yes	No	No	No	No	No	No	No	No	No	No	No		1	oxytocin	99	66	28.7	No	No	No	No	No	No	No	No	No	Spontaneous	2011-10-13
Control	TAM_36	25.5781	Hispanic	Married			<$34,999	No	No	No	No	No	3	2	No	No	2	8	12	ferrous sulfate (1.00), flagyl, macrodantin, PNV (1.00), Rhogam	Yes	Yes	No	No	No	No	No	No	No	No	No	No		1	oxytocin , SODIUM CITRATE-CITRIC ACID	128	82	35.9	No	No	No	Yes	Yes	No	No	No	No	No Labor	2011-08-15
Control	TAM_37	23.1452	Hispanic	Separated	home	High school/GED		No	No	No	No	No	3	2	No	No	2	30	6	PNV	Yes	No	No	No	No	No	No	No	No	No	No	No		1	cefazolin, famotidine, oracit	93	59	28.1	No	No	No	No	No	No	No	No	No	Spontaneous
Control	TAM_38	31.8521	Hispanic	Married	none	High school/GED	<$34,999	No	No	No	No	No	4	2	2	Yes	2	17	8	17-OHP, amoxicillin (500.00), ampicillin, PNV (1.00)	Yes	Yes	No	No	No	No	No	No	No	No	No	No		1		108	72	25.3	No	No	No	No	Yes	No	No	No	No	Spontaneous: Augmented	2011-08-16
Control	TAM_41	28.5041	Hispanic	Married	none	High school/GED	<$34,999	No	No	No	No	No	8	4	No	3	4	20	7	iron, miconazole, PNV (1.00)	Yes	Yes	No	No	No	No	No	No	No	No	No	No		1	fentanyl, oxytocin, penicillin	120	77	40.6	No	No	No	No	Yes	No	No	No	No	Induced	2011-08-16
Control	TAM_416	40.0274	Hispanic	Single- never married		Less than high school	<$34,999	No	No	No	No	No	5	4	No	No	4	8	12	PNV	Yes	No	No	No	No	No	No	No	No	No	No	No		1		91	66	27.6	No	No	No	No	No	No	No	No	No	Spontaneous
Control	TAM_418	26.3918	Black	Single- never married	none	High school/GED	<$34,999	No	No	No	No	No	5	1	No	3	1				No	No	Yes	Yes	No	No	No	No	No	No	No	No		1	celestone, fentaNYL, magnesium sulfate, meperidine, NALBUPHINE, NUBAIN, penicillin G, TYLENOL, ZOFRAN	119	67	25.4	No	No	No	No	No	No	No	No	Yes	Induced	2011-10-29
Control	TAM_434	28.7808	Hispanic	Married		Less than high school		No	No	No	No	No	4	3	No	No	3	15	10	nitrofurantoin, PNV	Yes	Yes	No	No	No	No	No	No	No	No	No	No		1		119	73	30.2	No	No	No	No	No	No	No	No	No	Spontaneous: Augmented	2011-10-26
Control	TAM_436	32.0521	Hispanic	Single- never married		Some college	<$34,999	No	No	No	No	No	6	5	No	Yes	4	6	8	NEXIUM, PNV	Yes	Yes	No	No	No	No	No	No	No	No	No	No		1	NUBAIN, pitocin, zofran	124	76	29.5	No	No	No	No	No	No	No	No	No	Induced	2011-10-25
Control	TAM_45	21.337	Hispanic	Married		Less than high school	<$34,999	No	No	No	No	No	1	0	No	No	0	21	6	PNV, tylenol	Yes	No	No	No	No	No	No	No	No	No	No	No		1	NUBAIN, pitocin	131	78	23.5	No	No	No	No	No	No	No	No	No	No Labor
Control	TAM_46	33.2219	Hispanic	Married	none	Less than high school	<$34,999	No	No	No	No	No	3	2	No	No	2	6	10	clindamycin, ferrous sulfate, PNV, terconazole	Yes	Yes	No	No	No	No	No	No	No	No	No	No	acetaminophen-codeine, ferrous sulfate, PNV	1	cefazolin, famotidine, oracit	94	59	24	No	No	No	Yes	No	No	No	No	No	Spontaneous
Control	TAM_469	23.7562	Hispanic	N	none		<$34,999	No	No	No	No	No	1	0	No	No	0				No	No	No	No	No	No	No	No	No	No	No	No		1	ampicillin, fentaNYL, gentamicin, pitocin, terbutaline	103	63	30.9	No	No	Yes	No	No	No	No	No	No	No Labor
Control	TAM_486	29.2274	Hispanic	Single- never married	none	Less than high school		No	No	No	No	No	1	0	No	No	0	18	13	PNV	Yes	Yes	No	No	No	No	No	No	No	No	No	No		1	pitocin	137	89	30.7	No	No	No	No	No	No	No	Yes	No	Spontaneous	2011-10-04
Control	TAM_513	21.6658	Hispanic	Married	none	Less than high school	<$34,999	No	No	No	No	No	2	1	No	No	1	31	8	PNV	Yes	No	No	No	No	No	No	No	No	No	No	No		1	ancef, PITOCIN	127	85	39.3	No	No	No	No	No	No	No	No	No	No Labor
Control	TAM_52	19.4192	White	Single- never married	none	Less than high school	<$34,999	No	No	No	No	No	3	2	No	No	2	20	7	acyclovir, iron (1.00), PNV (1.00)	Yes	Yes	No	No	No	No	No	No	No	No	No	No		1		113	65	28.5	No		No	No	No	No	No	No	No	Induced	2011-08-17
Control	TAM_56	36.6959	Hispanic	Single- never married	none	Less than high school		No	No	No	No	No	2	1	No	No	0	27	10	Ampicillin, Clarithromycin, Omeprazole, PNV	Yes	Yes	No	No	No	No	No	No	No	No	No	No		1	Ancef, bicitra, famotidine	119	65	33.3	No	No	No	No	No	No	No	No	No	Induced
Control	TAM_57	19.5123	Hispanic	Married	none	Less than high school		No	No	No	No	No	1	0	No	No	0	12	13	PNV	Yes	No	No	No	No	No	No	No	No	No	No	No		1	oracit, penicillin, pitocin	109	65	26.7	No	No	No	No	Yes	No	No	No	No	Spontaneous	2011-08-19
Control	TAM_577	37.474	Hispanic	Married	none	Less than high school	<$34,999	No	No	No	No	No	2	1	No	No	1	8	12	PNV	Yes	No	No	No	No	No	No	No	No	No	No	No		1	fentanyl, oxytocin	123	83	29.7	No	No	No	No	No	No	No	No	No	No Labor	2014-11-03
Control	TAM_59	27.3616	Hispanic	Married	house-wife	Less than high school	<$34,999	No	No	No	No	No	3	2	No	No	2	18	9	azithromycin, PNV	Yes	Yes	No	No	No	No	No	No	No	No	No	No		1	cefazolin, famotidine, SODIUM CITRATE-CITRIC ACID	111	66	33.8	Yes	No	No	No	No	No	No	No	No	No Labor
Control	TAM_60	24.9863	White	Married	none	Some college	<$34,999	No	No	No	No	No	4	3	No	No	3	18	10	PNV	Yes	No	No	No	Yes	Yes	No	No	No	No	No	No		1	cefazolin, famotidine, oracit	121	62	40.4	No	No	No	No	No	No	No	No	No	Induced
Control	TAM_61	37.1562	Not specified	Married		College degree	<$34,999	No	No	No	No	No	4	3	No	No	3	13	10	PNV	Yes	No	No	No	No	No	No	No	No	No	No	No		1	cefazolin, oracit	130	75	37.7	No	No	No	No	Yes	No	No	No	No	Induced
Control	TAM_610	23.9096	White	Married	none	High school/GED		No	No	No	No	No	2	0	No	Yes	0				No	No	No	No	No	No	No	No	No	No	No	No		1	pitocin	139	77	30.3			No	No	Yes	No	No	No	No	Induced	2011-11-22
Control	TAM_62	27.463	Hispanic	Single- never married	bus boy	Less than high school		No	No	No	No	No	3	2	No	No	2	21	10	celestone, PNV	Yes	Yes	Yes	Yes	Yes	Yes	No	No	No	No	No	No		1	clindomycin, famotidine, SODIUM CITRATE-CITRIC ACID			30	No	No	No	No	Yes	No	No	No	No	Spontaneous: Augmented
Control	TAM_64	20.7726	Hispanic	Married		Less than high school		No	No	No	No	No	1	0	No	No	0			PNV	Yes	No	No	No	No	No	No	No	No	No	No	No		1	ancef, oracit	108	81	30.4			No	No	No	No	No	No	No	No Labor	2011-08-23
Control	TAM_640	35.3123	Black	Single- never married	Student	Some college	<$34,999	No	No	No	No	No	2	1	No	No	1				No	No	No	No	No	No	No	No	No	No	No	No		1		113	66	34.3	No		No	No	No	No	No	No	No	Spontaneous
Control	TAM_648	30.3452	Hispanic	Single- never married		Less than high school	<$34,999	No	No	No	No	No	4	3	No	No	3	30	6		No	No	No	No	No	No	No	No	No	No	No	No		1		108	70	30.9	No	No	No	No	No	No	No	No	No	Spontaneous	2011-11-30
Control	TAM_653	30.611	Hispanic	Married	Housewife	Less than high school	<$34,999	No	No	No	No	No	2	1	No	No	1	25	10	PNV	Yes	No	No	Yes	No	No	No	No	No	No	No	No		1	fentaNYL, nubain, pitocin, promethazine, zofran	111	72	30	No	No	No	No	No	No	No	No	No	No Labor	2011-12-01
Control	TAM_66	28.8658	Hispanic	Separated		Less than high school	<$34,999	No	No	No	No	No	2	1	No	No	1	17	12	FeSO4 (1.00), PNV (1.00)	Yes	No	No	No	No	No	No	No	No	No	No	No		1	oxytocin	110	62	29.9	No	No	No	No	No	No	No	No	No	Spontaneous	2011-08-26
Control	TAM_671	41.1205	Hispanic	Married		Less than high school		No	No	No	No	No	1	0	No	No	0	23	10	PNV	Yes	No	No	No	No	No	No	No	No	No	No	No		1	chloroprocaine, fentaNYL, pitocin	141	56	25.8	No	No	No	No	No	No	No	No	No	Spontaneous	2011-12-04
Control	TAM_675	27.0274	Hispanic	Married	home	High school/GED	<$34,999	No	No	No	No	No	6	5	No	No	5	17	12		No	No	No	No	No	No	No	No	No	No	No	No		1	colace, famotidine in saline, iron, magnesium hydroxide, narcan, oxytocin	97	61	29.3	No	No	No	No	No	No	No	No	No	Spontaneous: Augmented	2011-12-05
Control	TAM_684	28.5644	Hispanic	Married			<$34,999	No	No	No	No	No	5	4	No	No	4	16	8	famotidine (20.00), prenatal vitamins (1.00)	Yes	Yes	No	Yes	No	No	No	No	No	No	No	No		1	nubain, oxtocin	119	69	37.1	No	No	No	No	No	No	No	No	No	Spontaneous: Augmented	2011-12-06
Control	TAM_69	34.9233	Hispanic	Married	none	Less than high school		No	No	No	No	No	7	5	No	Yes	5	14	14	azithromycin, cephalexin, flagyl, macrobid, PNV	Yes	Yes	No	No	No	No	No	No	No	No	No	No		1	fentanyl, oxytocin, penicillin, SODIUM CITRATE-CITRIC ACID	127	71	34.7	No	No	No	No	Yes	No	No	No	No	Spontaneous: Augmented	2011-08-28
Control	TAM_697	24.3589	Hispanic	Married		Less than high school	<$34,999	No	No	No	No	No	2	1	No	No	1	11	11	pnv	Yes	No	No	No	No	No	No	No	No	No	No	No		1		121	72	32.4	No	No	No	No	No	No	No	No	No	Spontaneous
Control	TAM_708	32.863	Hispanic	Single- never married		Some college	<$34,999	No	No	No	No	No	5	3	No	Yes	3			PNV	Yes	No	No	No	No	No	No	No	No	No	No	No		1	fentaNYL, pitocin	132	80	28.7	No	No	No	No	No	No	No	No	No	Spontaneous	2011-12-10
Control	TAM_714	24.1014	Hispanic	Married	No	Less than high school	<$34,999	No	No	No	No	No	4	2	No	Yes	2			ferrous sulfate (2.00), prenatal vitamins (1.00)	Yes	Yes	No	No	No	No	No	No	No	No	No	No		1	fentanyl, nubain, oxytocin, penicillin	109	77	26.7	No	No	No	No	Yes	No	No	No	No	No Labor	2011-12-11
Control	TAM_719	27.1233	Black	Married	none	College degree	<$34,999	No	No	No	No	No	4	3	No	No	3				No	No	No	No	No	No	No	No	No	No	No	No		1		132	73	44.1	No	No	No	No	Yes	No	No	No	No	Induced
Control	TAM_73	25.3945	Hispanic	Single- never married		High school/GED		No	No	No	No	No	1	0	No	No	0	7	17	ferrous sulfate, metronidazole, PNV	Yes	Yes	Yes	No	No	No	No	No	No	No	No	No		1	oracit, oxytocin	114	76	28.5	No	No	No	Yes	No	No	No	No	No	Spontaneous	2011-08-25
Control	TAM_736	29.0959	Hispanic	Married	none		<$34,999	No	No	No	No	No	1	0	No	No	0				No	No	No	No	No	No	No	No	No	No	No	No		1		143	86	34.9			No	No	No	No	No	No	No	Spontaneous	2011-12-15
Control	TAM_75	20.211	Hispanic	Single- never married			<$34,999	No	No	No	No	No	1	0	No	No	0	32		PNV	Yes	No	No	No	No	No	No	No	No	No	No	No	tylenol	1	cefazolin, famotidine, oracit	134	68	31.6	No	No	No	No	Yes	No	No	No	No	No Labor
Control	TAM_759	33.1096	Hispanic	Married	HW	Less than high school	<$34,999	No	No	No	No	No	5	4	No	No	4	13			No	No	No	No	No	No	No	No	No	No	No	No		1	ketorolas, oxytocin, penicillin, pnv , sublimaze, zofran	121	73	34	No	No	No	No	Yes	No	No	No	No	Spontaneous	2011-12-20
Control	TAM_76	21.6877	Hispanic	Married		High school/GED	<$34,999	No	No	No	No	No	1	0	No	No	0	14	10	PNV	Yes	No	No	No	No	No	No	No	No	No	No	No		1	fentanyl	116	54	31.5	No	No	No	No	No	No	No	No	No	Spontaneous	2011-08-29
Control	TAM_767	23.1863	Hispanic	Single- never married	Waitress	Some college	<$34,999	No	No	No	No	No	1	0	No	No	0				No	No	No	No	No	No	No	No	No	No	No	No		1		116	71	27.7	No	No	Yes	No	No	No	No	No	No	Spontaneous	2011-12-21
Control	TAM_787	22.6055	Hispanic	Married	nil	Some college	<$34,999	No	No	No	No	No	1	0	No	No	0	11	9	pnv	Yes	No	No	No	No	No	No	No	No	No	No	No		1	ondansetron, penicillin	127	76	32.5	No	No	No	No	Yes	No	No	No	No	Spontaneous	2011-12-27
Control	TAM_80	29.5726	Hispanic	Married				No	No	No	No	No	2	1	No	No	1	12	12	bactrim DS, cephalexin, hydroxyzine , PNV, ursodiol	Yes	Yes	No	No	No	No	No	No	No	No	No	No		1	fentanyl, Oxytocin	149	79	29.7	No	No	No	No	Yes	No	No	No	No	Induced
Control	TAM_81	29.7863	Hispanic	Married		Less than high school	<$34,999	No	No	No	No	No	2	1	No	No	1	24	11	metronidazole, PNV, terconazole	Yes	Yes	No	No	No	No	No	No	No	No	No	No		1	fentanyl, oracit			31.8	No	No	No	Yes	Yes	No	No	No	No	Spontaneous	2011-08-29
Control	TAM_82	37.6356	Hispanic	Married	Waitress	Less than high school	$35,000 - $74,999	No	No	No	No	No	5	4	No	No	4	15	11	PNV	Yes	No	No	No	No	No	No	No	No	No	No	Yes		1	Oxytocin, stadol	127	70	29.7	No	No	No	No	No	No	No	No	No	Induced
Control	TAM_85	23.2137	Hispanic	Single- never married		Less than high school	<$34,999	No	No	No	No	No	2	1	No	No	1	10	15	amoxicillin, PNV	Yes	Yes	No	No	No	No	No	No	No	No	No	No		1	fentanyl, penicillin	116	61	36.3	Yes	No	No	No	Yes	No	No	No	No	Spontaneous	2011-08-31
Control	TAM_86	26.2027	Hispanic	Married				No	No	No	No	No	3	2	2	No	1			pnv	Yes	No	No	No	No	No	No	No	No	No	No	No		1	fentanyl, oxytocin	116	67	30.5			No	No	No	No	No	No	No	Spontaneous: Augmented	2011-08-31
Control	TAM_89	33.7014	Hispanic	Single- never married		High school/GED	<$34,999	No	No	No	No	No	2	1	No	No	1	12	11	PNV	Yes	No	No	No	No	No	No	No	No	No	No	No		1	famotidine	140	78	35.7	No	No	No	No	No	No	No	No	No	Spontaneous	2011-08-31
Control	TAM_9	17.8712	Hispanic	Single- never married	student	Less than high school	$35,000 - $74,999	No	No	No	No	No	1	0	No	No	0	13	11	lamotrigine, PNV, promethazine suppository, prozac, TRIAMCINOLONE ACETONIDE	Yes	Yes	No	No	No	No	No	No	No	No	No	No		1	fentanyl			20.7	No	No	No	No	No	No	No	No	No	Spontaneous	2011-08-05
Control	TAM_90	25.6301	Hispanic	Married	nil		<$34,999	No	No	No	No	No	4	3	No	No	3	11	11	PNV	Yes	No	No	No	No	No	No	No	No	No	No	No		1	fentanyl	120	80	37.3	No	No	No	No	No	No	No	No	No	Spontaneous	2011-08-31
Control	TAM_95	18.2438	Hispanic	Married		Less than high school	<$34,999	No	No	No	No	No	3	1	No	Yes	1	11	9	amoxicillin, azithromycin, metronidazole, nitrofurantoin, nystatin, PNV, terconazole	Yes	No	No	No	No	No	No	No	No	No	No	No		1		134	76	27.1	Yes	No	No	No	Yes	No	No	No	No	Spontaneous	2011-08-31
Control	TAM_96	28.9315	Hispanic	Single- never married				No	No	No	No	No	8	5	Yes	Yes	5	14	10	ALBUTEROL INHALER, PNV	Yes	Yes	No	No	No	No	No	No	No	No	No	No		1	bicitra, oxytocin			44.5	No	No	No	No	No	No	No	No	No	Spontaneous: Augmented	2011-08-31
Control	TAM_97	18.0329	Black	Single- never married				No	No	No	No	No	1	0	No	No	0			FeSO4, PNV	Yes	Yes	Yes	No	No	No	No	No	No	No	No	No		1	ampicillin, clindamycin, gentamycin, nalbuphine, oracit, Oxytocin, promethazine	127	59	29.3	No	No	Yes	No	No	No	No	No	No	Induced
Control	TAM_98	23.3178	Hispanic	Married	homemaker	Less than high school	<$34,999	No	No	No	No	No	2	1	No	No	1			pnv, tylenol	Yes	Yes	Yes	No	Yes	No	No	No	No	No	No	No		1	cefazolin, famotidine, SODIUM CITRATE-CITRIC ACID	123	60	32.6	No	No	No	No	No	No	No	No	No	No Labor
GDM	TAM_102	28.3178	Hispanic	Married	none	High school/GED	<$34,999	No	No	No	No	No	4	2	No	Yes	2	15	8	glyburide, optivar, PNV, terconazole	Yes		No	No	No	No	No	No	No	No	No	No		1	misoprostol, oxytocin	108	64	31.1	No	No	No	No	Yes	Yes	No	No	No	Induced
GDM	TAM_1030	30.7479	White	Married	Home	Less than high school		No	No	No	No	No	4	2	No	Yes	2	13	10	glyburide, insulin, prenatal vitamins	Yes		No	No	No	No	No	No	No	No	No	No		1	fentanyl, insulin, penicillin	135	86	39.3	No	No	No	No	No	Yes	No	No	No	Spontaneous	2012-02-10
GDM	TAM_1040	32.663	Hispanic	Married	none	Less than high school	<$34,999	No	No	No	No	No	5	4	No	No	4			glyburide, prenatal vitamins	Yes		No	No	No	No	No	No	No	No	No	No		1	fentanyl, nubain, oxytocin	95	65	34.5	No	No	No	No	No	Yes	No	No	No	Induced
GDM	TAM_105	34.6192	Hispanic	Married	house-wife	High school/GED	<$34,999	No	No	No	No	No	5	3	No	Yes	3	22	10	cephalexin, flagyl, PNV	Yes		No	No	No	No	No	No	No	No	No	No		1	fentanyl, oxytocin	113	73	36.3	No	No	No	Yes	No	Yes	No	No	No	Induced
GDM	TAM_1107	23.9123	Hispanic	Single- never married	none	Less than high school	<$34,999	No	No	No	No	No	3	2	No	No	2	26		PNV	Yes		No	No	No	No	No	No	No	No	No	No		1	fentanyl, glyburide, oxytocin, PCN	123	75	34.4	No	No	No	No	No	Yes	No	Yes	No	Spontaneous	2014-05-03
GDM	TAM_1178	26.874	Hispanic	Married	nil	Less than high school	<$34,999	No	No	No	No	No	1	0	No	No	0	17	12	glyburide (1.50), pnv	Yes		No	No	No	No	No	No	No	No	No	No		1	cytotec, penicillin, pitocin	134	87	32.5	No	No	No	No	Yes	Yes	Yes	No		Induced
GDM	TAM_1279	37.7863	Hispanic	Married	housewife	Less than high school	<$34,999	No	No	No	No	No	5	2	No	2	2	9	19	glyburide, pnv, zofran	Yes		No	No	No	No	No	No	No	No	No	No		1	penicillin, pitocin	111	70	32.2	No	No	No	No	Yes	Yes	No	Yes	No	Induced
GDM	TAM_1303	26.6795	Hispanic	Married	nil	High school/GED	<$34,999	No	No	No	No	No	2	1	No	No	1	9	12	pnv, ursodiol	Yes		No	No	No	No	No	No	No	No	No	No		1	pitocin	112	68	24.2	No	No	No	No	No	Yes	No	No	No	Induced
GDM	TAM_134	30.5452	Hispanic	Married	none			No	No	No	No	No	6	5	No	No	5	27		insulin NPH, Insulin regular, PNV	Yes		No	No	No	No	No	No	No	No	No	No		1	bicitra, cefazolin, oxytocin	121	76	33.3	No	No	No	No	No	Yes	No	No	No	Induced
GDM	TAM_1385	34.8712	Hispanic	Married	waitress	Less than high school		No	No	No	No	No	3	1	No	Yes	1	11	17	glyburide, pnv	Yes		No	No	No	No	No	No	No	No	No	No		1	penicillin, pitocin	129	83	35.3	No	No	No	No	Yes	Yes	No	No	No	Induced
GDM	TAM_141	40.7479	Hispanic	Married	cashier	College degree	<$34,999	No	No	No	No	No	1	0	No	No	0	11	17	folic acid, glyburide, prenatal vitamins	Yes		No	Yes	No	No	No	No	No	No	No	No		1	benedryl, cefazolin, fentanyl, oracit, oxytocin	130	69	31.7	No	No	No	No	No	Yes	No	No	No	Induced
GDM	TAM_1466	32.7781	Hispanic	Single- never married	home	Less than high school	<$34,999	No	No	No	No	No	2	1	No	No	1			glyburide, prenatal vitamins	Yes		No	No	No	No	No	No	No	No	No	No		1	cefazolin	109	70	32	No	No	No	No	No	Yes	No	No	No	No Labor
GDM	TAM_156	40.2795	Hispanic	Married	none	High school/GED	<$34,999	No	No	No	No	No	12	11	No	No	11	20	14	glyburide, pnv	Yes		No	No	No	No	No	No	No	No	No	No		1	fentanyl, oxytocin, penicillin	138	83	37.4	No	No	No	No	Yes	Yes	No	Yes	No	Induced
GDM	TAM_1597	42.9425	Hispanic	Married	Home	Less than high school	<$34,999	No	No	No	No	No	5	3	No	Yes	3	12	12	glyburide, prenatal vitamins	Yes		No	No	No	No	No	No	No	No	No	No		1	fentanyl, nubain, oxytocin	106	66	33.1	No	No	No	No	No	Yes	No	Yes	No	Induced
GDM	TAM_160	39.5397	Hispanic	Married	none	High school/GED	<$34,999	No	No	No	No	No	5	1	Yes	2	2	9	27	insulin NPH, insulin regular, keflex, nitrofurantoin, PNV	Yes		No	No	No	No	No	No	No	No	No	No		1	oxytocin, penicillin, SODIUM CITRATE-CITRIC ACID	146	92	35.7	No	No	No	No	Yes	Yes	No	Yes	No	Induced
GDM	TAM_163	39.8027	Hispanic	Married	house-wife	High school/GED	<$34,999	No	No	No	No	No	4	3	No	No	3	11	11	clindamycin, ferrous sulfate, glyburide, nexium, PNV, vitamin C	Yes		No	No	No	No	No	No	No	No	No	No		1	fentanyl, oracit, oxytocin	148	85	34.4	No	No	No	No	Yes	Yes	No	Yes	No	Spontaneous: Augmented	2011-09-13
GDM	TAM_1657	34.0329	Hispanic	Married	none	High school/GED	<$34,999	No	No	No	No	No	2	1	No	No	1	11	18		No		No	No	No	No	No	No	No	No	No	No		1	ceftriaxone	140	74	28.3	No	No	No	No	Yes	Yes	No	No	No	Spontaneous	2012-06-12
GDM	TAM_168	33.8055	Hispanic	Married	housewife	Less than high school	<$34,999	No	No	No	No	No	2	1	No	No	1	8	17	PNV	Yes		No	No	No	No	No	No	No	No	No	No		1	fentanyl	123	78	26.3	No	No	No	No	No	Yes	No	No	No	Spontaneous	2011-09-14
GDM	TAM_171	32.9068	Hispanic	Single- never married		Less than high school	<$34,999	No	No	No	No	No	3	2	No	No	2	10	13	bactrim DS, glyburide, nitrofurantoin, PNV, promethazine	Yes		No	No	No	No	No	No	No	No	No	No		1	fentanyl			33.8	No	No	No	No	Yes	Yes	No	No	No	Induced	2011-09-14
GDM	TAM_185	27.9342	Hispanic	Married	cook	High school/GED	<$34,999	No	No	No	No	No	4	1	No	2	1	17	10	ampicillin, bactrim DS, cephalexin, glyburide, nitrofurantoin, PNV	Yes		No	No	No	No	No	No	No	No	No	No		1	ancef, bicitra, pepcid, reglan	120	67	37.6	No	No	No	No	Yes	Yes	No	No	No	Induced
GDM	TAM_205	32.074	Hispanic	Married	Housewife	High school/GED	<$34,999	No	No	No	No	No	3	2	No	No	2	8	15	glyburide, PNV	Yes		No	No	No	No	No	No	No	No	No	No		1	fentanyl, oracit	109	64	26.9	No	No	No	No	No	Yes	No	No	No	Induced	2011-09-20
GDM	TAM_209	30	Hispanic	Single- never married		High school/GED	<$34,999	No	No	No	No	No	3	1	No	Yes	1	20	12	glyburide	No		No	No	No	No	No	No	No	No	No	No		1	oxytocin	127	84	32.2	No	No	No	No	No	Yes	No	No	No	Spontaneous
GDM	TAM_218	25.7863	Hispanic	Single- never married		Less than high school	<$34,999	No	No	No	No	No	2	1	No	No	1	10	9	PNV	Yes		No	No	No	No	No	No	No	No	No	No		1	cefazolin, fentanyl	113	61	34.3	No	No	No	No	No	Yes	No	No	No	Spontaneous
GDM	TAM_23	29.5452	Hispanic	Single- never married			<$34,999	No	No	No	No	No	4	1	No	2	1	13	9	CEPHALEXIN, insulin NPH, insulin regular, PNV, Rhogam	Yes	Yes	No	No	No	No	No	No	No	No	No	No	cephalexin, insulin NPH, insulin regular	1	cefazolin, SODIUM CITRATE-CITRIC ACID	99	49	64.7	No	No	No	No	Yes	Yes	No	No	No	Spontaneous
GDM	TAM_236	25.5781	Hispanic	Married	homemaker	Less than high school	$35,000 - $74,999	No	No	No	No	No	1	0	No	No	0	13	10	glyburide, PNV, terconazole	Yes		No	No	No	No	No	No	No	No	No	No		1	cefazolin, cytotec, oxytocin	120	76	28.5	No	No	No	No	No	Yes	No	No	No	Induced	2011-09-28
GDM	TAM_250	34.2849	Hispanic	Married		Less than high school	<$34,999	No	No	No	No	No	2	0	No	Yes	0	12	14	glyburide, macrobid, PNV	Yes		No	No	No	No	No	No	No	No	No	No		1	cefazolin, cytotec, oracit, oxytocin	118	70	32.8	No	No	No	No	No	Yes	No	No	No	No Labor	2011-09-29
GDM	TAM_32	35.8	Hispanic	Single- never married	none	Less than high school	<$34,999	No	No	No	No	No	4	0	No	3	0	8	13	ferrous sulfate (1.00), glyburide, PNV (1.00)	Yes	Yes	No	No	No	No	No	No	No	No	No	No		1	ampicillin, clindamycin, fentanyl, gentamicin, oracit, oxytocin, tylenol	119	76	37	No	No	Yes	No	No	Yes	No	No	No	Spontaneous
GDM	TAM_4287	29.7945	Hispanic	Married	none	High school/GED	<$34,999	No	No	No	No	No	2	1	No	No	1	14	12	acyclovir, iron, phenergan, PNV	Yes		No	No	No	No	No	No	No	No	No	No		1	fentanyl, pitocin	121	75	30.7	No	No	No	No	Yes	Yes	No	No	No	Induced
GDM	TAM_476	42.5699	Hispanic	Married		Less than high school		No	No	No	No	No	4	2	No	Yes	2	18	18	NPH Insulin, prenatal vitamins	Yes		No	No	No	No	No	No	No	No	No	No		1	cefazolin, famotidine, fentanyl, morphine, oracit, oxytocin	119	75	35	No	No	No	No	No	Yes	No	No	No	Spontaneous: Augmented
GDM	TAM_53	36.1205	Black	Single- never married	none		<$34,999	No	No	No	No	No	3	2	No	No	2	31	8	ferralet (1.00), glyburide (1.50), PNV (1.00)	Yes	Yes	No	No	No	No	No	No	No	No	No	No		1	fentanyl, oxytocin	135	76	32.6	No	No	No	No	No	Yes	No	No	No	Induced
GDM	TAM_587	39.0822	Hispanic	Married			<$34,999	No	No	No	No	No	5	2	No	2	2	10	17	PNV	Yes		No	No	No	No	No	No	No	No	No	No		1	insulin , clindamycin, famotidine, gentamicin	115	69	43.9	No	No	No	No	Yes	Yes	No	No	No	No Labor
GDM	TAM_641	21.1014	Hispanic	Married	none	Less than high school	<$34,999	No	No	No	No	No	1	0	No	No	0	25			No		Yes	No	No	No	No	No	No	No	No	No		1	PCN	151	70	27.8	Yes	No	No	No	Yes	Yes	No	Yes	No	Induced	2011-11-29
GDM	TAM_647	38.9205	Hispanic	Married		Less than high school	<$34,999	No	No	No	No	No	3	1	No	Yes	1	9		glyburide, PNV	Yes		No	No	No	No	No	No	No	No	No	No		1	cytotec, glyburide, Oxytocin, Pitocin			34	No	No	No	No	No	Yes	No	No	No	Spontaneous
GDM	TAM_657	35.3699	Hispanic	Married		College degree		No	No	No	No	No	3	1	No	Yes	1			glyburide (1.50), pnv	Yes		No	No	No	No	No	No	No	No	No	No		1		105	70	32.4	No	No	No	No	No	Yes	No	No	No	Spontaneous: Augmented
GDM	TAM_68	28.6438	Hispanic	Married		High school/GED	<$34,999	No	No	No	No	No	2	1	No	No	1			glyburide (2.00), PNV	Yes	Yes	No	No	No	No	No	No	No	No	No	No	fentanyl, nubain, promethazine	1	benadryl, cefazolin, famotidine, nubain, oracit, oxytocin	117	75	31.2	No	No	Yes	No	No	Yes	No	Yes	No	Spontaneous
GDM	TAM_725	37.4219	Hispanic	Married			<$34,999	No	No	No	No	No	5	2	No	2	2	13	19	insulin, PNV	Yes		No	No	No	No	No	No	No	No	No	No		1	cytotec, fentaNYL, pitocin	131	67	36.9	No	No	No	No	No	Yes	No	Yes	No	Spontaneous: Augmented
GDM	TAM_74	36.9233	Hispanic	Separated	none	Less than high school		No	No	No	No	No	6	5	No	No	5	10	13	amoxicillin, glyburide, mupirocin, PNV, tylenol	Yes	Yes	No	No	No	No	No	No	No	No	No	No		1	fentanyl, penicillin	116	61	31.7	No	No	No	No	Yes	Yes	No	No	No	No Labor	2011-08-25
GDM	TAM_79	25.9945	Hispanic	Single- never married	none			No	No	No	No	No	3	0	Yes	Yes	1			glyburide, PNV	Yes	Yes	No	No	No	No	No	No	No	No	No	No		1	oracit, Oxytocin	119	65	34.4	No	No	No	No	No	Yes	No	Yes	No	Induced
GDM	TAM_803	35.9041	Hispanic	Single- never married	none	Less than high school	<$34,999	No	No	No	No	No	3	2	No	No	2	9	14	glyburide, phenergan, PNV, zofran	Yes		Yes	No	No	No	No	No	No	No	No	No		1	fentanyl, labetalol, oxytocin	137	93	40.6	No	No	No	No	No	Yes	No	Yes	Yes	Induced
GDM	TAM_816	19.2658	Hispanic	Single- never married	nil	Less than high school	<$34,999	No	No	No	No	No	2	1	No	No	1				No		No	No	No	No	No	No	No	No	No	No		1	ancef	133	84	33.5	No	No	No	No	No	Yes	No	Yes	No	No Labor
GDM	TAM_817	21.0055	Hispanic	Single- never married	none	Less than high school	<$34,999	No	No	No	No	No	1	0	No	No	0	16	13		No		No	No	No	No	No	No	No	No	No	No		1		118	75	29.3	No	No	No	No	Yes	Yes	No	No	No	Spontaneous	2012-01-05
GDM	TAM_886	18.9507	Hispanic	Married	none	High school/GED	<$34,999	No	No	No	No	No	2	0	No	Yes	0	17	16	PNV	Yes		No	No	No	No	No	No	No	No	No	No		1	ampicillin, fentaNYL, gentamicin, NUBAIN, pitocin, promethazine	136	91	31.6	No	No	No	No	No	Yes	No	No	No	Induced
GDM	TAM_900	25.6521	Hispanic	Married	none	Less than high school	<$34,999	No	No	No	No	No	4	2	No	Yes	2	10	12	flunisolide, glyBURIDE micronized, loratadine, PNV	Yes		Yes	Yes	No	No	No	No	No	No	No	No		1	CYTOTEC, NUBAIN, pitocin, promethazine			41.1	No	No	No	No	No	Yes	No	Yes	No	Induced
GDM	TAM_930	28.0247	Black	Single- never married	none	Some college		No	No	No	No	No	2	0	No	Yes	0	7	14	acyclovir, DILANTIN, folic acid, insulin, PNV, Progesterone Micronized	Yes		Yes	No	No	No	No	No	No	No	No	No	DILANTIN, glucagon, insulin, progesterone, promethazine	1	dilantin, fentaNYL, NUBAIN, penicillin G, pitocin	135	79	37.5	No	No	No	No	No	Yes	No	No	No	Induced
GDM	TAM_963	30.463	Hispanic	Married	home	Some college	<$34,999	No	No	No	No	No	3	2	2	No	2	17	5	prenatal vitamins (1.00)	Yes		No	No	No	No	No	No	No	No	No	No	hydroxyprogesterone, maalox, nitrofurantoin	1	fentanyl, oxytocin	94	57	33.7	No	No	No	No	No	Yes	No	No	No	Spontaneous	2012-01-30
PRE	TAM_1155	33.5726	Hispanic	Single- never married	none	Less than high school	<$34,999	No	No	No	No	No	3	1	No	Yes	1	24	8	cephalexin, ferrous sulfate, fluconazole, prenatal vitamins (1.00)	Yes	Yes	No	No	No	No	No	No	No	No	No	No	acetaminophen, nitrofurantoin	1	fentanyl, nubain, oxytocin	123	83	42.4	No	No	No	No	Yes	No	Yes	No	Yes	Induced
PRE	TAM_1175	17.6219	Hispanic	Single- never married	none	Less than high school	<$34,999	No	No	No	No	No	1	0	No	No	0	17	11	prenatal vitamins (1.00)	Yes	No	No	No	No	No	No	No	No	No	No	No		1	penicillin	115	70	25.8	No	No	No	No	Yes	No	Yes	No	No	Spontaneous: Augmented	2012-03-10
PRE	TAM_1196	36.9205	Hispanic	Married	none	Less than high school	<$34,999	No	No	No	No	No	4	3	No	No	3	11	10	pnv	Yes	No	No	No	No	No	No	No	No	No	No	No		1		167	91	35	No	No	No	No	No	No	Yes	No	No	Spontaneous	2012-03-13
PRE	TAM_121	27.5397	Hispanic	Married	nil	High school/GED		No	No	No	No	No	2	1	No	No	1	10	11	iron, PNV	Yes	No	No	No	No	No	No	No	No	No	No	No		1	cefazolin	163	101	32.2	No	No	No	No	No	No	Yes	No	Yes	No Labor
PRE	TAM_138	19.0466	Black	Single- never married		Some college		No	No	No	No	No	1	0	No	No	0	7	16	iron, PNV, promethazine	Yes	Yes	No	No	No	No	No	No	No	No	No	No		1	cefazolin, famotidine, fentanyl, nubain, oxytocin, penicillin, SODIUM CITRATE-CITRIC ACID	134	75	52.3	No	No	No	No	Yes	No	Yes	No	No	Induced
PRE	TAM_1446	27.7096	Hispanic	Married	home	Less than high school	<$34,999	No	No	No	No	No	4	3	No	No	3	10	13	prenatal vitamins (1.00)	Yes	Yes	No	No	No	No	No	No	No	No	No	No		1	fentanyl, labetalol, oxytocin	158	91	49.8	No	No	No	No	No	No	Yes	No	Yes	Spontaneous: Augmented	2012-04-28
PRE	TAM_1487	23.9808	White	Married	nil	High school/GED	<$34,999	No	No	No	No	No	1	0	No	No	0	33	5		No	No	No	No	No	No	No	No	No	No	No	No		1		144	87	31.4	No	No	No	No	No	No	Yes	No	No	Spontaneous	2012-05-08
PRE	TAM_1595	24.2384	Hispanic	Married	none	High school/GED	<$34,999	No	No	No	No	No	2	1	No	No	1	31	1		No	No	No	No	No	No	No	No	No	No	No	No		1	cocoon, epinephrine, fentanyl, lactated ringer, morphine, narcan, oxytocin, sodium citrate	118	72	29.2	No	No	No	No	No	No	Yes	No	No	Spontaneous	2012-06-01
PRE	TAM_1634	34.3507	Hispanic	Married	fabric store worker	Some college	<$34,999	No	No	No	No	No	5	3	No	Yes	3	24	7	amoxicillin (500.00), pnv (1.00)	Yes	Yes	No	No	No	No	No	No	No	No	No	No		1	peniciillin, pitocin	145	91	32.7	No	No	No	No	Yes	No	Yes	No	No	Spontaneous
PRE	TAM_1763	18.7479	Hispanic	Married		Less than high school		No	No	No	No	No	1	0	No	No	0			PNV	Yes	Yes	No	No	No	No	No	No	No	No	No	No		1	fentanyle	123	71	19.9	No	No	No	No	No	No	Yes	No	No	No Labor	2012-06-26
PRE	TAM_2379	30.5425	Not specified	Married	No	Some college	<$34,999	No	No	No	No	No	4	3	No	No	3	15	15	pnv, terconazole	Yes	No	No	No	No	No	No	No	No	No	No	No		1	pitocin	141	94	28.2	No	No	No	No	No	No	Yes	No	No	No Labor
PRE	TAM_245	21.0411	Hispanic	Single- never married	none		<$34,999	No	No	No	No	No	1	0	No	No	0	12	11	pnv	Yes	No	No	No	No	No	No	No	No	No	No	No		1	fentanyl, oxytocin			37.1	No	No	No	No	No	No	Yes	No	No	Induced
PRE	TAM_2470	33.5123	Hispanic	Married	home	High school/GED	<$34,999	No	No	No	No	No	1	0	No	No	0		5	prenatal vitamins	Yes	No	No	No	No	No	No	No	No	No	No	No		1	ampicillin, cefazolin, fentanyl, gentamycin, labetalol, misoprostol	139	93	28	No	No	Yes	No	No	No	Yes	No	No	Spontaneous: Augmented
PRE	TAM_2637	33.726	Hispanic	Married	HW	Less than high school	<$34,999	No	No	No	No	No	2	1	No	No	1	11	9	prenatal vitamins	Yes	No	No	No	No	No	No	No	No	No	No	No		1	fentanyl, oxytocin, penicillin	166	88	33.1	No	No	No	No	Yes	No	Yes	No	No	Spontaneous	2012-10-18
PRE	TAM_2750	18.7945	Black	Single- never married		High school/GED	<$34,999	No	No	No	No	No	1	0	No	No	0	30	5	prenatal vitamins	Yes	No	No	No	No	No	No	No	No	No	No	No		1	fentanyl, oxytocin	144	89	39.1	No	No	No	No	No	No	Yes	No	No	Spontaneous	2012-10-31
PRE	TAM_2846	19.4082	Hispanic	Single- never married	cashier	Less than high school		No	No	No	No	No	1	0	No	No	0	7	13	pnv	Yes	No	No	No	No	No	No	No	No	No	No	No		1	pitocin	125	75	28.9	No	No	No	No	No	No	Yes	No	No	Spontaneous: Augmented	2012-11-11
PRE	TAM_2892	18.8411	Black	Single- never married	None	Some college	<$34,999	No	No	No	No	No	1	0	No	No	0	13	13	iron, pnv	Yes	No	Yes	Yes	Yes	Yes	No	No	No	No	No	No		1	pitocin	152	102	32.9	No	No	No	No	No	No	Yes	No	No	Spontaneous	2012-11-19
PRE	TAM_3232	16.0658	Hispanic	Separated	homemaker	High school/GED	<$34,999	No	No	No	No	No	1	0	No	No	0	25	5	pnv	Yes	No	No	No	No	No	No	No	No	No	No	No		1	ampicillin, gentamicin	138	82	28.2	No	No	Yes	No	No	No	Yes	No	No	Spontaneous	2012-12-27
PRE	TAM_3347	18.4603	Hispanic	Married	Housewife			No	No	No	No	No	1	0	No	No	0	8	15	azithromycin (500.00), pnv	Yes	Yes	No	No	No	No	No	No	No	No	No	No		1	cytotec, labetalol, magnesium sulfate, pitocin	171	97	46.1	Yes	No	Yes	No	No	No	Yes	No	Yes	Spontaneous: Augmented
PRE	TAM_3997	31.2301	Hispanic	Single- never married	none	High school/GED	<$34,999	No	No	No	No	No	1	0	No	No	0	9	15	PNV	Yes	No	No	No	No	No	No	No	No	No	No	No		1	fentanyl, magnesium sulfate	151	89	26.3	No	No	No	No	No	No	Yes	No	Yes	Induced	2013-03-26
PRE	TAM_4096	25.6548	Hispanic	Married	Homemaker	Less than high school	<$34,999	No	No	No	No	No	1	0	No	No	0	19	11	PNV	Yes	No	No	No	No	No	No	No	No	No	No	No		1	fentanyl, labetalol, pitocin	195	107	31.2	Yes	No	No	No	No	No	Yes	No	Yes	Spontaneous: Augmented
PRE	TAM_4125	31.989	Hispanic	Married		Less than high school	<$34,999	No	No	No	No	No	6	1	4	No	5	32		PNV	Yes	No	No	No	No	No	No	No	No	No	No	No		1	fentanyl, penicillin, pitocin	135	83	33.1	No	No	No	No	Yes	No	Yes	No	Yes	No Labor
PRE	TAM_4276	36.6466	Hispanic	Married	none	High school/GED	<$34,999	No	No	No	No	No	1	0	No	No	0	13		PNV	Yes	No	No	No	No	No	No	No	No	No	No	No		1	cytotec, terbutaline	130	81	27.3	No	No	No	No	No	No	Yes	No	No	Induced
PRE	TAM_4337	25.5151	Hispanic	Married			<$34,999	No	No	No	No	No	1	0	No	No	0	9	14	PNV	Yes	No	No	No	No	No	No	No	No	No	No	No		1	ampicillin, clindamycin, fentanyl, gentamicin, pitocin	148	89	34.5	No	No	Yes	No	No	No	Yes	No	No	Spontaneous
PRE	TAM_4622	42.2329	Hispanic	Married		High school/GED	<$34,999	No	No	No	No	No	4	2	No	Yes	2	13	10	amoxicillin, PNV	Yes	Yes	No	No	No	No	No	No	No	No	No	No		1	fentanyl	119	71	33.7	No	No	No	No	No	No	Yes	No	No	Induced	2013-06-19
PRE	TAM_5039	19.2219	Hispanic	Married		High school/GED		No	No	No	No	No	1	0	No	No	0	11	12	PNV	Yes	No	No	No	No	No	No	No	No	No	No	No		1	Ancef, pitocin	149	94	37.9	No	No	No	No	No	No	Yes	No	No	No Labor	2013-08-08
PRE	TAM_5155	19.1205	Hispanic	Married		Less than high school	<$34,999	No	No	No	No	No	1	0	No	No	0	18	9	PNV, TERCONAZOLE	Yes	Yes	No	No	No	No	No	No	No	No	No	No		1	cefazolin, FENTANYL , oxytocin	115	61	28.3		No	No	No	No	No	Yes	No	No	Spontaneous
PRE	TAM_5239	29.389	Hispanic	Married	Home	High school/GED	<$34,999	No	No	No	No	No	6	4	No	Yes	4	35	6		No	No	No	No	No	No	No	No	No	No	No	No		1	oxytocin	127	75	55.4	No	No	No	No	No	No	Yes	No	No	Induced
PRE	TAM_5314	25.2274	Hispanic	Married				No	No	No	No	No	2	0	No	Yes	0	14	7	PNV	Yes	No	No	Yes	No	No	No	No	No	No	No	No		1	pitocin	129	88	33.2	No	No	No	No	No	No	Yes	No	No	No Labor
PRE	TAM_5661	25.5671	Hispanic	Married	House-wife	High school/GED	<$34,999	No	No	No	No	No	2	1	No	No	1	20	7	PNV	Yes	No	No	No	No	No	No	No	No	No	No	No		1	fentanyl, oxytocin	158	86	36.3	No	No	No	No	No	No	Yes	No	No	Spontaneous
PRE	TAM_5735	24.1945	Hispanic	Married		High school/GED	<$34,999	No	No	No	No	No	3	2	No	No	2	37	2	PNV, terconazole	Yes	Yes	No	No	No	No	No	No	No	No	No	No		1	fentanyl	138	90	32.7	No	No	No	No	No	No	Yes	No	No	Spontaneous	2013-10-28
PRE	TAM_6009	20.4767	Black	Single- never married	security officer	Some college		No	No	No	No	No	1	0	No	No	0	12	14		No		No	No	No	No	No	No	No	No	No	No		1	ampicillin, clindamycin, fentanyl, gentamicin, oxytocin, penicillin	119	73	31.5	No	No	Yes	No	Yes	No	Yes	No	No	Induced
PRE	TAM_606	28.9918	Hispanic	Single- never married		Less than high school	<$34,999	No	No	No	No	No	3	1	No	Yes	1	25	7	PNV	Yes	No	No	No	Yes	Yes	No	No	No	No	No	No		1	Cytotec, Fentanyl, Nubain, Pitocin	137	74	44.5	No	No	No	No	No	No	Yes	No	No	No Labor
PRE	TAM_6109	29.589	White	Single- never married	none	Less than high school		No	No	No	No	No	4	3	No	No	3	12	10	famotidine, folic acid, nitrofurantoin, PNV	Yes		Yes	No	No	No	No	No	No	No	No	No		1	oxytocin, tylenol			34.2	No	No	No	No	Yes	No	Yes	No	Yes	Spontaneous: Augmented
PRE	TAM_6171	18.863	Hispanic	Single- never married				No	No	No	No	No	1	0	No	No	0	8	12	iron, PNV	Yes		No	No	No	No	No	No	No	No	No	No		1	oxytocin	138	94	29.1	No	No	No	No	No	No	Yes	No	No	No Labor	2013-12-18
PRE	TAM_622	28.1836	White		none	Less than high school	<$34,999	No	No	No	No	No	1	0	No	No	0	10	10	famotidine (40.00), nitrofurantin (100.00), pnv	Yes	Yes	No	No	No	No	No	No	No	No	No	No		1	ancef, magnesium sulfate, oxytocin, penicillin	145	81	32.6	No	No	No	No	Yes	No	Yes	No	Yes	Induced	2011-11-25
PRE	TAM_6284	31.9315	White	Single- never married	none		<$34,999	No	No	No	No	No	2	1	No	No	1	17	7	PNV	Yes		No	No	No	No	No	No	No	No	No	No		1	fentanyl, oxytocin, penicillin	135	78	33.6	No	No	Yes	No	Yes	No	Yes	No	Yes	Spontaneous: Augmented
PRE	TAM_6342	31.3123	Hispanic	Single- never married	waitress			No	No	No	No	No	1	0	No	No	0	8			No		No	No	No	No	No	No	No	No	No	No		1	OXYTOCIN	123	76	38.1	No	No	No	No	No	No	Yes	No	No	Spontaneous	2014-01-07
PRE	TAM_687	35.7753	Hispanic	Single- never married		High school/GED	<$34,999	No	No	No	No	No	3	1	No	Yes	1	6		PNV	Yes	No	No	No	No	No	No	No	No	No	No	No		1	NUBAIN, penicillin G, pitocin, promethazine	130	88	35	No	No	No	No	Yes	No	Yes	No	No	No Labor	2011-12-07
PRE	TAM_7064	33.189	Hispanic	Married	none	Less than high school	<$34,999	No	No	No	No	No	3	2	No	No	2	7	13	PNV	Yes	No	No	No	No	No	No	No	No	No	No	No		1	FAMOTIDINE, OXYTOCIN	112	58	29.8	No	No	No	No	No	No	Yes	No	No	Induced	2014-03-31
PRE	TAM_7124	34.7534	Hispanic	Single- never married	none	Less than high school		No	No	No	No	No	3	2	No	No	2	16	8	PNV	Yes	No	No	No	No	No	No	No	No	No	No	No	PNV	1	Fentnyl, pitocin, stadol	129	87	37.6	No	No	No	No	No	No	Yes	No	No	No Labor
PRE	TAM_7186	29.5836	Hispanic	Single- never married	none	Less than high school	<$34,999	No	No	No	No	No	4	2	No	Yes	2	21	8	Glyburide, iron, PNV, synthroid	Yes	Yes	No	No	No	No	No	No	No	No	No	No		1	famotidine (PEPCID), Glyburide , synthroid	131	89	42.6	No	No	No	No	No	No	Yes	No	No	Spontaneous: Augmented
PRE	TAM_7194	33.3123	Hispanic	Married	none	High school/GED		No	No	No	No	No	5	4	No	No	3	34	2	PNV	Yes	No	No	No	No	No	No	No	No	No	No	No		1	ACETAMINOPHEN, FENTANYL, NIFEDIPINE, OXYTOCIN	171	95	37.7			No	No	No	No	Yes	No	Yes	Induced	2014-04-17
PRE	TAM_721	38.3288	Hispanic	Married	none	Less than high school	<$34,999	No	No	No	No	No	3	2	No	No	2	6	9	PNV	Yes	No	No	No	No	No	No	No	No	No	No	No		1	CYTOTEC, magnesium sulfate, penicillin G, pitocin, promethazine	144	82	37.8	No	No	No	No	Yes	No	Yes	No	Yes	Spontaneous
PRE	TAM_7263	35.0466	White	Married	none	Some college	<$34,999	No	No	No	No	No	4	3	No	No	3	8	4	pnv	Yes	No	No	No	No	No	No	No	No	No	No	No		1	lidocaine, pitocin, tylenol	126	81	25.5	No	No	Yes	No	No	No	Yes	No	No	Induced	2014-04-28
PRE	TAM_7486	19.1945	Hispanic	Single- never married	none	High school/GED	<$34,999	No	No	No	No	No	1	0	No	No	0	11	12	PNV	Yes	No	No	No	No	No	No	No	No	No	No	No		1	cytotec, Fentanyl	128	82	32.6	No	No	No	No	No	No	Yes	No	Yes	Spontaneous	2014-05-19
PRE	TAM_7635	29.926	Hispanic	Married	none	Less than high school	<$34,999	No	No	No	No	No	2	1	No	No	1	33	5	PNV	Yes	No	No	No	No	No	No	No	No	No	No	No		1	fentanyl, oxytocin	139	95	34.3	No	No	Yes	No	No	No	Yes	No	No	No Labor
PRE	TAM_7924	18.6219	Hispanic	Single- never married	none	Less than high school	<$34,999	No	No	No	No	No	1	0	No	No	0	7	11	iron, PNV	Yes	No	No	No	No	No	No	No	No	No	No	No		1	cytotec, oxytocin, tylenol	130	88	31.1	No	No	Yes	No	No	No	Yes	No	No	Induced
PRE	TAM_7931	22.6932	Hispanic	Married	none	College degree	<$34,999	No	No	No	No	No	1	0	No	No	0	7	11	PNV, Rhogam	Yes	Yes	No	No	No	No	No	No	No	No	No	No		1	oxytocin	139	75	38.3	No	No	No	No	No	No	Yes	No	No	Induced
[truncated: 14 more columns]

## Sheet: Table S2 - Elution gradient
Elution Gradient
Time (min)	% MPA	% MPB	Flow rate (mL/min)
0	60	40	0.25
2	50	50	0.25
3	40	60	0.25
12	30	70	0.25
15	25	75	0.25
17	22	78	0.25
19	15	85	0.25
22	8	92	0.25
25	1	99	0.25
34	1	99	0.25
Column wash
Time (min)	% MPA	% MPB	Flow rate (mL/min)
34.5	60	40	0.3
35	1	99	0.3
35.5	1	99	0.3
36	60	40	0.35
37	60	40	0.3
38	60	40	0.25

## Sheet: Table S3- Filtered Proteins
REFERENCE	ACCESSION	SHORT_DESC	#TOTAL_PEPTIDES	#UNIQUE_PEPTIDES	GDM v Ctrl Adjusted Pval	GDM v Ctrl Log2FC	PRE v Ctrl Adjusted Pval	PRE v Ctrl Log2FC	GDM v. Ctrl Flag	PRE v. Ctrl Flag	TAMU_10_Control_D_31Aug17_Fir_16-11-29	TAMU_106_Control_D_9Aug17_Fir_16-11-29	TAMU_109_Control_D_9Aug17_Fir_16-11-29	TAMU_111_Control_D_14Aug17_Fir_16-11-29	TAMU_116_Control_D_9Aug17_Fir_16-11-29	TAMU_120_Control_D_17Aug17_Fir_16-11-29	TAMU_123_Control_D_7Aug17_Fir_16-11-29	TAMU_124_Control_D_25Sep17_Fir_16-11-29	TAMU_125_Control_D_25Sep17_Fir_16-11-29	TAMU_127_Control_D_28Jul17_Fir_16-11-29	TAMU_129_Control_D_25Sep17_Fir_16-11-29	TAMU_13_Control_D_15Sep17_Fir_16-11-29	TAMU_139_Control_D_15Sep17_Fir_16-11-29	TAMU_15_Control_D_10Jul17_Fir_16-11-29	TAMU_150_Control_D_9Jul17_Fir_16-11-29	TAMU_158_Control_D_5Sep17_Fir_16-11-29	TAMU_172_Control_D_9Aug17_Fir_16-11-29	TAMU_173_Control_D_28Jul17_Fir_16-11-29	TAMU_18_Control_D_28Jul17_Fir_16-11-29	TAMU_187_Control_D_12Jul17_Fir_16-11-29	TAMU_188_Control_D_2Aug17_Fir_16-11-29	TAMU_2_Control_D_14Aug17_Fir_16-11-29	TAMU_202_Control_D_21Aug17_Fir_16-11-29	TAMU_203_Control_D_21Aug17_Fir_16-11-29	TAMU_21_Control_D_30Jul17_Fir_16-11-29	TAMU_216_Control_D_25Sep17_Fir_16-11-29	TAMU_223_Control_D_14Aug17_Fir_16-11-29	TAMU_224_Control_D_31Aug17_Fir_16-11-29	TAMU_228_Control_D_25Sep17_Fir_16-11-29	TAMU_233_Control_D_15Aug17_Fir_16-11-29	TAMU_243_Control_D_13Sep17_Fir_16-11-29	TAMU_244_Control_D_15Aug17_Fir_16-11-29	TAMU_263_Control_D_21Aug17_Fir_16-11-29	TAMU_265_Control_D_23Aug17_Fir_16-11-29	TAMU_28_Control_D_5Sep17_Fir_16-11-29	TAMU_307_Control_D_21Aug17_Fir_16-11-29	TAMU_318_Control_D_25Sep17_Fir_16-11-29	TAMU_332_Control_D_15Sep17_Fir_16-11-29	TAMU_340_Control_D_9Aug17_Fir_16-11-29
RAN_HUMAN	Q9CSP3	GTP-binding nuclear protein Ran	3	3	1	-3.30444	0.24138	-3.43506	0	0															9.32498
FREM3_HUMAN	P0C091	FRAS1-related extracellular matrix protein 3	2	2	0.197526	-1.65111	0.152195	-1.99868	0	0					15.6181										11.5699					11.0366						13.3184
ITAL_HUMAN	P20701	Integrin alpha-L	2	1	1	-0.107919	0.590358	-1.98718	0	0							15.8423
PCBP1_HUMAN	Q15365	Poly(rC)-binding protein 1	4	3	0.900704	0.319237	0.166956	-1.68162	0	0						15.6962				13.8775					13.306					13.8489		15.0538					10.3469									11.0857
SIAT1_HUMAN	P15907	Beta-galactoside alpha-2,6-sialyltransferase 1	2	2	0.202979	-1.84928	0.120577	-1.53251	0	0	16.6922											15.6783																							14.7876
GPV_HUMAN	P40197	Platelet glycoprotein V	6	6	0.225863	-1.73417	0.329552	-1.45976	0	0																													11.4134
PPBT_HUMAN	Q5BKZ5	Alkaline phosphatase, tissue-nonspecific isozyme	3	3	0.208461	-0.490795	0.0149961	-1.44898	0	--		9.89058				10.2225					10.504									11.5578		9.98439	9.94151				9.58851					11.1736	9.64949				10.1513		9.80766
LOXH1_HUMAN	Q8IVV2	Lipoxygenase homology domain-containing protein 1	2	2	0.317796	-0.624797	0.157216	-1.37923	0	0																		9.51651								11.9736		11.5539
PAI1_HUMAN	P05121	Plasminogen activator inhibitor 1	5	5	0.445723	0.371558	0.00277306	-1.24905	0	-					12.6209										12.2618						12.948				13.0432
CHIT1_HUMAN	Q9UDJ8	Chitotriosidase-1	2	2	0.143363		0.18364	-1.11589	0	0																																		10.741
BCAM_HUMAN	P50895	Basal cell adhesion molecule	2	2	0.388764	-0.819634	0.158721	-1.10254	0	0	15.3084		19.0014		19.0983	18.9067	10.9804	18.4279		11.299	18.9553				17.8278		19.2913	18.0129	18.1743	17.8176	18.3503		11.8928		18.4906	19.3143		18.9486	19.2687		18.4997	19.3449	11.4784		18.9293
ATRN1_HUMAN	Q5VV63	Attractin-like protein 1	2	1	0.344002	-0.397807	0.0560571	-0.944654	0	0															12.5127						12.3388				13.46
EHD1_HUMAN	Q9H4M9	EH domain-containing protein 1	5	1	0.947902	-0.354482	0.611133	-0.910977	0	0	11.4714							11.4546							18.0254								11.9174	11.3657			19.0109					11.6324	12.73
EHD3_HUMAN	Q9NZN3	EH domain-containing protein 3	6	1	0.947902	-0.354482	0.611133	-0.910977	0	0	11.4714							11.4546							18.0254								11.9174	11.3657			19.0109					11.6324	12.73
G6PI_HUMAN	P06744	Glucose-6-phosphate isomerase	20	20	0.799008	-0.458137	0.441688	-0.902739	0	0		17.77	11.3679	11.0362		10.7694	16.9996	10.5446	9.85525		17.1616				17.6761	17.4871	10.3149	17.9054		13.1321	18.0297				17.7608	18.0635	17.755					17.5963		12.9265				17.2765
PTPRZ_HUMAN	P23471	Receptor-type tyrosine-protein phosphatase zeta	2	2	1	1.24745	0.182665	-0.897926	0	0
NUMA1_HUMAN	Q14980	Nuclear mitotic apparatus protein 1	3	3	0.839695	0.455875	0.704679	-0.844496	0	0	9.61526							12.9918									15.2188																			10.5917
F107B_HUMAN	Q9H098	Protein FAM107B	2	2	0.927769	-0.165867	0.182383	-0.839751	0	0		11.8324		12.6891		12.8695		14.093															12.2819			11.7945							13.4571	10.3173		12.8446
FIBA_HUMAN	P02671	Fibrinogen alpha chain	123	123	0.971453	-0.0568691	0.00530472	-0.816492	0	-	17.6596	19.2342	19.0504	18.8871	15.408	14.6519	15.7564	17.919	19.0462	18.1524	15.9861	19.2033	18.427	15.2397	17.9341	16.2713	15.1133	19.5995	18.7609	16.8978	19.2227	18.7529	18.9416	18.4551	17.708	18.3556	18.1455	17.3023	18.2585	19.2869	17.4309	14.8273	18.0571	18.7071	18.6107	17.523	18.5317	15.5134	17.9894
THIC_HUMAN	Q9BWD1	Acetyl-CoA acetyltransferase, cytosolic	2	2	0.503019	0.434637	0.059207	-0.786122	0	0		15.0023	15.1377										14.3706							11.462					13.7949	14.4478	13.6684								13.9203
LEG10_HUMAN	LEG10_HUMAN	LEG10_HUMAN	3	3	0.462439	0.275829	1	-0.760021	0	0						11.2107
GSHR_HUMAN	P00390	Glutathione reductase, mitochondrial	7	7	0.765065	0.32218	0.222994	-0.742281	0	0	9.95284																		11.371																			11.0032
GAS6_HUMAN	Q14393	Growth arrest-specific protein 6	5	5	0.787504	-0.167407	0.0133335	-0.734913	0	-	13.5256		14.9963	14.3615					15.241	13.6216		14.8538	14.8952	11.9928	13.1258			14.6354	14.5787		15.2802	12.515	12.4795	14.5822	13.7579			13.0508		15.253	12.9521		13.8985	14.2252	13.7615	11.8817	14.3844		12.9947
TCPA_HUMAN	P17987	T-complex protein 1 subunit alpha	3	3	0.595915	-0.531078	0.296136	-0.669934	0	0				10.5756																						14.7322
TADBP_HUMAN	Q96DJ0	TAR DNA-binding protein 43	2	2	0.789321	-0.170338	0.0235852	-0.658719	0	-	14.3184		15.5866	16.5971	13.4819		12.3855		18.1763	16.2459	17.8673	16.2455	15.6722	12.9153	15.0387	14.2568	12.684	16.5126	16.0176		16.6348	16.0072	15.1855		15.3712	17.4554	13.5317	13.7528	16.2936	16.1187	14.2459			15.8358	15.1287			13.8297	15.7529
FIBB_HUMAN	P02675	Fibrinogen beta chain	71	71	0.872971	0.104547	0.00879602	-0.653845	0	-	12.8627	14.5375	14.5374	13.9676	11.964	11.264	12.7734	14.8639	15.3853	15.3484	12.6405	14.7438	14.7771	11.7836	14.1746	13.0248	12.1824	14.8392	14.4752	12.4726	14.5372	15.5581	15.7298	14.3207	13.594	14.5702	13.5062	13.5925	14.0641	15.6483	13.4034	11.6221	14.0431	14.2203	13.576	13.7647	15.6511	12.4806	15.5602
PSG5_HUMAN	Q15238	Pregnancy-specific beta-1-glycoprotein 5	15	4	0.98474	-0.025689	0.000321456	-0.646477	0	-	14.7335	16.2791	14.2574	14.5786	13.9738	13.4331	13.7332	14.3272	13.537	14.5845	15.6651	15.3141	14.809	15.1917	14.4869	14.0355	14.5441	15.3408	14.554	16.1445	14.3756	15.8739	15.52	15.3256	15.4666	15.9155	15.6648	14.809	14.1238	15.5801	14.4555	16.4692	14.775	14.2014	15.8634	14.2822	14.4975	15.5901	14.6578
PI42A_HUMAN	P48426	Phosphatidylinositol 5-phosphate 4-kinase type-2 alpha	6	3	0.323694	-0.619445	0.245488	-0.641746	0	0					12.8971										12.8178				12.7047		12.509				14.1472
ACPH_HUMAN	P13798	Acylamino-acid-releasing enzyme	3	3	0.0626818	-0.478253	0.00981797	-0.622432	0	-	13.1138	12.823	12.5963	12.0527	12.2959	12.4508	11.659	13.2673	12.7393	12.1433	11.72	12.5189	14.9385	13.0072	12.2066	13.0261	12.7283	12.0028	12.2231	12.1954	11.7591	13.5816	11.764	15.4252	12.3929	12.5685	11.1356	12.5072	12.8343	15.714	12.6516	13.1183	12.7403	12.7505	14.9023	11.9987	12.6435	16.1257	12.633
ARGI1_HUMAN	P05089	Arginase-1	2	2	0.256285	0.567193	0.39599	-0.60721	0	0		14.0577		15.955					14.5441												15.3894						14.6728							13.0625
AHNK_HUMAN	Q09666	Neuroblast differentiation-associated protein AHNAK	4	4	0.668532	-0.465899	0.621244	-0.578229	0	0
PLXB1_HUMAN	O43157	Plexin-B1	4	4	0.967921	-0.196243	0.734588	-0.553655	0	0				11.3311										12.6294	16.2395												11.4382												11.4431
GLHA_HUMAN	P01215	Glycoprotein hormones alpha chain	5	5	0.51402	-0.383164	0.459672	-0.549858	0	0																										11.2608
GALNS_HUMAN	P34059	N-acetylgalactosamine-6-sulfatase	2	2	0.627718	0.214908	0.948184	-0.528496	0	0
FST_HUMAN	P19883	Follistatin	4	4	0.0358829	-0.432226	0.0137101	-0.527185	-	-	13.4357		13.7451			12.6012	10.8548	13.2803	13.5804							12.8125						12.4421	12.6923	14.1794		12.7636		12.1791	12.754			12.9941	13.462		14.2474	13.1096	13.4656		11.9471
FAM3C_HUMAN	Q92520	Protein FAM3C	3	3	0.374245	-0.519782	0.323143	-0.507904	0	0																		10.4866											10.1103	10.8273		11.0523
GNPTG_HUMAN	Q9UJJ9	N-acetylglucosamine-1-phosphotransferase subunit gamma	10	10	0.874465	-0.162386	0.298281	-0.489371	0	0	15.3392	13.1271		13.0243	13.1758	17.7178	13.0553	12.8234	13.1098	18.202	12.8919	13.3834	13.0096	13.0839	15.1873	13.6965	12.6498	17.6632		18.1232	17.6755	18.5821	12.9325	12.9979	12.9675	12.6976	13.3105	13.2449	12.9893	12.9491	13.1921	13.4346	13.4024		13.1778		12.7791	13.6374
HBB_HUMAN	Q549N7	Hemoglobin subunit beta	32	15	0.544354	0.412064	0.415745	-0.487025	0	0	11.5758	13.8529	12.1619	14.0628	12.0055	21.4754	11.3618	21.9185	13.8695	11.3959	11.5139	13.5624	12.8967	14.5889	13.7473	13.3829	23.1209	11.7646	13.9863	12.113	14.6493	12.9986	11.4024	13.1365	15.9863	13.7372	12.2412	13.1215	11.3802	15.2663	13.0675	12.4525	12.7459	11.6767	12.5934	12.5091	11.2257	12.2762	17.5837
PDGFC_HUMAN	Q9NRA1	Platelet-derived growth factor C	3	3	0.0881812	-0.436692	0.0413717	-0.47684	0	-	16.6998	15.2552	15.3042	14.2832	16.2881	15.2433	15.377	11.7784	14.3377	14.1965	14.0842		14.676		14.8375	13.1466	15.8801	13.8439	12.6513	13.6832	14.1529	16.6626	16.2945	14.5414		14.7837	15.7964	15.0608	14.2122	16.2078	12.6363	15.8965	15.1994	13.6637	15.4715	15.6497	13.0666	13.6755	14.9992
KRT85_HUMAN	P78386	Keratin, type II cuticular Hb5	3	1	0.16465	-0.628713	0.310303	-0.458304	0	0			14.3833	12.0956	12.9761	13.8804				13.4285					12.916		13.0601	14.3448	13.6421	13.7808	13.3372				13.4466	16.0578		14.1471	15.3827		12.3962	14.6744
K2C78_HUMAN	Q8N1N4	Keratin, type II cytoskeletal 78	3	2	0.16465	-0.628713	0.310303	-0.458304	0	0			14.3833	12.0956	12.9761	13.8804				13.4285					12.916		13.0601	14.3448	13.6421	13.7808	13.3372				13.4466	16.0578		14.1471	15.3827		12.3962	14.6744
ACE_HUMAN	P12821	Angiotensin-converting enzyme	7	7	0.899466	-0.129838	0.477274	-0.453216	0	0	10.374			12.2238							10.1416				10.3678				9.93912		12.045		10.0718	9.11058									10.2536	9.41223		11.7672
SVEP1_HUMAN	Q8NBT9	Sushi, von Willebrand factor type A, EGF and pentraxin domain-containing protein 1	76	75	0.637859	-0.101379	0.00132023	-0.449929	0	-	11.3468	11.9718	11.782	11.3791	11.5377	11.7162		10.9093	12.1763	11.6087	12.18	11.5999	12.3846	11.3118	11.4511			11.6986	11.5188	12.106	10.9457	12.4941	12.0142	11.617	11.51	12.1047	11.9571	10.88	11.2007	12.0004	10.979	12.1807	11.4274	11.0965	12.0571	11.0625	11.5944		10.4403
PSG7_HUMAN	Q13046	Putative pregnancy-specific beta-1-glycoprotein 7	24	4	0.242988	-0.222628	0.00457658	-0.448521	0	-	15.5728	14.307	14.5214	14.2948	14.0209	14.3276	13.7332	15.5225	14.1389	14.7549	16.0991	13.931	14.7193	14.7045	15.4833	13.6299	14.8834	14.8984	14.7355	16.7705	14.0508	16.7738	14.5522	16.226	15.0604	16.0689	15.8092	14.7624	13.8613	12.5722	14.4555	16.2591	15.3415	13.3323	15.023	13.5639	13.1329	14.8867	14.7489
K2C75_HUMAN	O95678	Keratin, type II cytoskeletal 75	3	1	0.158319	-0.622901	0.302719	-0.445686	0	0			14.3833	12.0956	12.9761	13.8804				13.4285					12.916		13.0601	14.3448	13.6421	13.7808	13.3372				13.4466	16.0578		14.1471	15.3827		12.3962	14.6744
IBP1_HUMAN	P08833	Insulin-like growth factor-binding protein 1	7	7	1	0.368571	0.0368076	-0.445232	0	-																																		11.3221
HSP7C_HUMAN	P11142	Heat shock cognate 71 kDa protein	25	16	0.633123	-0.0919216	0.000131883	-0.443972	0	-	11.6975	12.9009	12.2658	11.1823		11.2525	11.696	11.3308	11.862	12.1811		12.7928	11.0298	12.0308	11.5527			12.2413	12.2556	12.5569	12.197	12.3405	11.7417	11.6216	11.617	11.7888	12.1463			12.4773		11.6457	11.8114	11.6839	11.6834	11.6313	10.97		11.6802
CATH_HUMAN	P09668	Pro-cathepsin H	2	2	0.933736	0.133483	0.465706	-0.433229	0	0			10.7048			11.4244											10.8093															11.4317
FBN1_HUMAN	P35555	Fibrillin-1	11	8	0.999411	0.00904124	0.302366	-0.42377	0	0	11.7599	14.1272	15.2445	11.6956	10.8755	11.8629	11.0948	10.3129	10.8741	11.2145	15.963	12.0647	12.344	11.8529	10.9569	12.5837	11.5158	10.8136	11.2459	12.9612	11.1174	13.3253	11.0576	11.4162	16.4746	16.1527	13.1463	11.7932	11.3461	16.8931	16.499	11.4551	11.2002	11.008	11.5092	11.7464	11.5709	11.965	11.2029
PSG3_HUMAN	Q16557	Pregnancy-specific beta-1-glycoprotein 3	26	2	0.343513	-0.186905	0.00641922	-0.421325	0	-	15.3216	14.307	14.5214	14.2948	14.0681	14.3276	13.7332	15.3806	13.3839	14.596	16.0991	13.931	14.7193	14.7045	15.4833	13.6299	14.8834	14.8984	14.6377	16.6032	14.0508	16.7738	14.5522	15.9243	15.0604	15.9689	15.8083	14.9965	13.8613	12.5722	14.4555	15.9539	15.3415	13.3323	15.023	13.8577	13.1329	15.2221	14.7489
STXB2_HUMAN	Q15833	Syntaxin-binding protein 2	6	6	0.911267	0.0545408	0.0118759	-0.418665	0	-	11.1262	11.845	11.088		10.8939			12.0869	11.8928			11.8335			11.295			10.7593	10.8217	10.9672	10.7341				10.9137			11.387		10.8029				10.8447	11.9346	11.1078	11.6364	11.4932	11.6082
CO6A1_HUMAN	P12109	Collagen alpha-1(VI) chain	2	2	0.577202	0.417693	0.335229	-0.415075	0	0		10.8728				10.6227		10.3156									11.671			9.95145						12.1664	9.74617												12.3986
PXDC2_HUMAN	Q6UX71	Plexin domain-containing protein 2	9	9	0.612058	0.720055	0.831545	-0.414123	0	0		17.7856	19.2712		11.9519	12.0343		18.7669	18.5895	11.3549	20.4614	18.6678		18.471	17.5659			17.7714	18.3813	18.221	17.4911					13.0366		18.8478	19.6362			12.9473	17.7009	17.8108			19.3291		11.3734
SYYC_HUMAN	P54577	Tyrosine--tRNA ligase, cytoplasmic	3	3	0.999593	-0.00821073	0.377897	-0.412889	0	0	10.7035		11.5488				11.5317		10.4143								11.1783	12.2507		11.4462	11.573	13.5098	13.1295		12.8118		13.2605			12.336		13.2788	12.5829						12.3188
HBA_HUMAN	P69905	Hemoglobin subunit alpha	19	17	0.844495	0.170949	0.375063	-0.411097	0	0	12.4925	13.4695	13.0126	13.5904	13.4435	20.7198	11.8169	21.5327	14.0724	13.3803	12.5234	13.6658	13.408	14.047	13.6631	13.2317	22.3223	13.3231	13.9226	13.2615	14.284	13.1661	12.536	13.1269	15.2527	13.6392	12.8002	13.0752	12.8397	14.8249	12.6632	13.5361	12.9635	12.6858	13.222	12.4214	12.7957	13.4212	16.6559
FETUB_HUMAN	Q9UGM5	Fetuin-B	26	26	0.999708	0.00179376	7.66e-06	-0.410476	0	-	15.1215	15.4946	14.8931	16.0286	14.7595	14.5314	15.0719	15.2649	15.3016	14.3732	14.9902	14.6956	14.9149	14.9686	15.2934	14.4802	15.0195	15.2533	15.0529	15.535	14.7117	15.1188	15.5881	15.4854	14.8857	15.4125	15.2308	14.6898	15.2135	15.9557	14.9072	15.0026	15.4712	14.2471	15.1797	15.2953	15.1373	14.9925	14.8669
ZFHX3_HUMAN	Q15911	Zinc finger homeobox protein 3	2	1	0.994501	-0.031667	0.393802	-0.408137	0	0	18.6088	18.2687	18.2604	18.394	18.2835	17.6787	17.659	18.2068	18.3529	18.0279	18.5298	18.6034	18.4516	17.9532	17.6436	18.2263	18.241	17.8768	18.2749	18.0382	18.1152	18.1977	18.0865	17.9355		18.2976	17.8834	11.307	18.5229	18.3043	18.4526	17.7821	18.2986	18.016	17.6542	18.8191	18.3799	18.3648	18.1103
PAFA_HUMAN	Q13093	Platelet-activating factor acetylhydrolase	7	7	0.952491	0.0522608	0.109306	-0.407277	0	0	10.9632	11.5241						11.1042		11.404	11.8227	12.6984		11.969	11.7937	11.3874			12.8749				11.1157	12.4476		12.019	11.0996		11.694		12.4811		13.4769	11.6972	11.0336		12.0393
RECK_HUMAN	O95980	Reversion-inducing cysteine-rich protein with Kazal motifs	3	3	0.0143479	2.71784	0.893237	-0.389723	+	0							15.7767															12.6552				13.0122	11.0428
TRPM6_HUMAN	Q9BX84	Transient receptor potential cation channel subfamily M member 6	3	2	0.754126	-0.483008	0.827182	-0.387602	0	0
PRUNE_HUMAN	Q9C071	Protein prune homolog	2	2	0.113449	-1.22669	0.657724	-0.362126	0	0						10.1669																				11.2879			10.9131
NID2_HUMAN	Q14112	Nidogen-2	2	1	0.789986	0.124145	0.131321	-0.357547	0	0	11.3417											12.2156			11.4727			11.971	11.1049	11.5903	10.9577	11.7945	12.2109			12.6507	12.5254		10.9857	11.7917				10.5273
PGRP1_HUMAN	O75594	Peptidoglycan recognition protein 1	3	3	0.966598	0.0320484	0.000797398	-0.355519	0	--		11.4208	11.1774	10.958					11.2355	10.4401		11.9818	11.1718		11.2248			12.0036			11.6375	11.1143	10.8681	10.6126		11.477	11.2562			11.2607				11.0251	11.1058		10.6445
OLA1_HUMAN	Q9Y6G4	Obg-like ATPase 1	2	2	0.998851	-0.0200305	0.608006	-0.355503	0	0		14.1497	14.0522	14.0368				15.4903								14.3751
PSG8_HUMAN	Q9UQ74	Pregnancy-specific beta-1-glycoprotein 8	19	1	0.998976	0.00580249	0.030597	-0.354946	0	-	18.3346	16.8431	17.8567	17.59	17.0773	17.7261	17.3133	17.8994	16.3666	17.568	18.5289	16.876	17.7311	17.9584	18.2499	16.3127	17.6967	18.1488	17.768	18.5158	17.9401	18.9691	17.9119	18.2375	18.8386	18.2068	18.7001	17.9815	17.6491	17.7171	17.8316	18.6405	18.3182	16.8657	18.3201	17.0091	16.4796	18.425	18.1892
CSPG2_HUMAN	P13611	Versican core protein	4	4	0.030557	-0.534878	0.178645	-0.353374	--	0		11.3961													10.4836							11.1917										11.8055	10.8829						11.1007
MYL6_HUMAN	P60660	Myosin light polypeptide 6	3	2	0.0713319	-0.514336	0.153985	-0.349353	0	0																			11.5263					11.8821	12.3647						11.9271				12.1163			12.1135
NFM_HUMAN	P07197	Neurofilament medium polypeptide	2	1	0.993554	0.0343489	0.563625	-0.34867	0	0			11.5024	11.683
S100P_HUMAN	P25815	Protein S100-P	5	5	0.932787	-0.117573	0.482833	-0.346768	0	0		10.5742	11.4938	14.0506	10.8472	11.2768			10.7219	10.9235		11.1502	15.835			15.3853	10.5655	10.7925	10.6871	10.1361		11.0512						10.7418		10.8353	11.6527	12.5446	9.66774	11.4945		15.9108			10.6623
CEMIP_HUMAN	CEMIP_HUMAN	CEMIP_HUMAN	2	2	0.913455	0.078031	0.167602	-0.339215	0	0	9.82542	12.3449	11.2425	10.4796		10.141		11.3109	12.7061	11.6783		12.4509	11.3909	10.9442	12.35	10.4122	9.98013	11.2072	10.3803			11.8168		10.2894	11.7678	12.4596		11.7337	12.162		12.4501	13.279	12.8431	12.1892			12.2572	11.923	12.5956
OSMR_HUMAN	Q99650	Oncostatin-M-specific receptor subunit beta	4	4	0.29593	-0.304429	0.188722	-0.332842	0	0	10.6958			11.0452	10.9617				10.8819	10.2082	11.156			11.1305	10.9888	11.498		10.9693	11.1931		10.7857	11.324	10.8837	10.494	11.2681		10.5136	11.12	11.3622	11.2226	11.0702	11.4592		10.834	11.473	11.2278	11.0101		12.13
LEGL_HUMAN	Q3ZCW2	Galectin-related protein	5	5	0.463756	-0.305176	0.407728	-0.331614	0	0															9.27327					10.3529	9.83988													10.1494
AMPE_HUMAN	Q07075	Glutamyl aminopeptidase	10	10	0.921621	-0.156238	0.666348	-0.32612	0	0	10.9947	10.1932		10.9703		10.6775			10.7085	10.5313	10.4902				10.7681					10.8469		10.911	10.8634				10.927			11.0515		11.1567	10.4711	14.9246	10.7642		10.4093		10.294
SYNE1_HUMAN	Q9UJ06	Nesprin-1	5	5	0.47151	-0.118558	0.0056095	-0.325597	0	-	17.1511	16.3008	17.9052	16.7725	15.93	17.8526	14.6372	16.6518	17.1421	16.074	16.3002	16.7589	16.7416	15.1192	16.2822	16.4331	16.2156	18.1674	16.2883	16.813	16.4513	15.7465	16.4413	17.1486	16.1899	17.2345	15.9008	16.4883	16.4175	16.7165	16.8256	15.7724	17.1904	16.1132	17.4541	16.3386	16.9104	16.5004	16.0786
PSG4_HUMAN	Q00888	Pregnancy-specific beta-1-glycoprotein 4	27	4	0.840529	-0.0694408	0.032549	-0.321373	0	-	18.3806	17.5412	17.6756	17.4651	17.1527	17.5168	17.0667	17.9925	17.2137	17.6763	18.691	16.6192	17.8433	18.0331	18.4358	17.1185	17.9341	17.9437	17.5629	18.5555	17.9366	19.164	17.5463	18.9296	18.2147	19.015	18.9625	18.0513	17.7647	17.4798	17.6137	18.6635	18.02	17.27	17.957	16.6399	16.441	18.3708	17.8747
PCOC1_HUMAN	Q15113	Procollagen C-endopeptidase enhancer 1	8	8	0.412546	-0.137857	0.00397666	-0.316693	0	-	11.1291	11.633	11.0609									11.8363					11.6749								11.8023	11.4372			11.5703		11.332				11.7097
IBP3_HUMAN	P17936	Insulin-like growth factor-binding protein 3	24	24	0.421404	-0.103456	0.000854087	-0.31342	0	-	14.5046	13.484	13.4738	12.7295	12.8818	12.4723	13.1087	14.4802	13.4675	13.0686	14.4192	14.3769	14.3998	13.7076	13.5866	13.2995	13.2973	14.5077	13.9499	14.1622	14.3375	13.444	13.9189	13.878	14.1852	14.4426	13.9897	13.1032	13.1831	13.6969	13.9388	13.6296	13.5081	14.0357	13.9498	13.6157	13.8646	13.5365	13.8451
CALD1_HUMAN	Q05682	Caldesmon	6	6	0.0696427	0.701093	0.285811	-0.313174	0	0						11.9869	11.176																			11.5747	11.6733			11.9276		11.9657			12.3215	11.8084			11.203
PSG1_HUMAN	Q6ICR4	Pregnancy-specific beta-1-glycoprotein 1	38	11	0.705159	0.132914	0.15368	-0.311598	0	0	18.6596	14.7692	18.45	18.1221	17.4221	18.019	17.7502	18.2382	16.6561	17.9214	18.6948	17.1718	16.9863	18.4545	18.6793	16.6294	17.9537	18.6945	17.6267	18.9566	18.3682	19.5721	18.538	18.6882	19.4505	18.4825	19.1923	18.5132	18.1145	18.0114	18.1487	18.9859	18.9118	17.4116	19.0536	17.0025	16.6442	18.8464	18.5833
CYC_HUMAN	P99999	Cytochrome c	3	3	0.805741	-0.218725	0.445473	-0.311423	0	0					11.6116	10.3684					11.0652							13.4143	12.7026		10.5601		10.5269	11.4956	11.5141	12.3889	9.22494		12.0425			12.5857							9.11569
CRLF3_HUMAN	Q8IUI8	Cytokine receptor-like factor 3	2	2	0.050482	-0.447752	0.2315	-0.310568	0	0	15.9349	15.6676	14.2806	14.1779		16.5601	15.499	14.3254	15.0171	14.9092		15.2876	14.7452	14.7266		12.9519	15.5449		13.8257	13.4604	14.8988	15.9321	16.3266	15.6123		15.8151	15.6898	15.0986	14.9167	15.6466	12.9793	16.4009	15.3923	14.0112	15.9568	15.4339	14.2205	14.5028	14.8733
FA12_HUMAN	P00748	Coagulation factor XII	50	50	0.339142	-0.10708	0.000393341	-0.305679	0	-	18.0285	17.347	17.1358	16.8811	17.4965	17.2283	16.8973	17.2541	17.1941	17.1941	16.2945	17.3794	17.5414	17.0531	17.3073	16.6951	17.9217	17.9366	17.5066	16.8731	17.2743	17.3816	17.4734	17.5066	17.2207	17.9687	17.2683	17.5769	17.241	17.1469	17.547	18.1959	17.9054	17.8077	17.6235	17.0629	16.8006	16.547	17.2779
AL1A1_HUMAN	P00352	Retinal dehydrogenase 1	4	4	0.206402	-0.467408	0.705215	-0.304981	0	0		10.4716																	10.0321	10.6159						10.7105
ROA3_HUMAN	P51991	Heterogeneous nuclear ribonucleoprotein A3	2	2	0.478879	-0.21127	0.213977	-0.304513	0	0	11.3682	12.0961	11.9648	11.2816	11.5431	9.39074		10.7765	12.1104	11.4108	8.69369	12.5323	12.3476	9.0643	11.2217	10.6061	9.81864	11.1814	11.3071	10.9488	11.8221	11.8087	12.7195	11.8501	10.6932	11.9577	11.2648	10.9441	11.8535	12.2389		8.11601	11.6652	11.9397	11.6741	11.3455	11.119	10.3829	11.3958
RHG01_HUMAN	Q07960	Rho GTPase-activating protein 1	9	9	0.0180454	-0.338802	0.45221	-0.303582	--	0	10.8747	14.6114	18.0866	15.386	10.0766	11.7849	11.9304	13.2824	13.1282	18.1091	11.5742	12.7822	12.2147	14.5104	14.3296	12.9679	10.9581	18.3787	18.1344	12.8214	12.1689	12.2728	12.3248	11.9036	10.9234	12.7965	12.621	13.0075	12.8902	13.4443	13.2262	13.4782	12.025	13.3091	13.1498	13.0047	12.7841	12.854	15.6857
CBG_HUMAN	P08185	Corticosteroid-binding globulin	27	23	0.581988	0.133653	0.0777621	-0.295863	0	0	17.8574	17.9894	17.7228	16.0735	17.7815	17.1335	17.7785	15.6468	18.398	17.4409	18.0665	17.7868	17.1755	16.4074	18.4559	17.607	18.204	18.6287	17.9353	19.0959	17.7736	18.3106	17.8172	17.8507	18.1966	18.648	18.6041	17.7712	18.3926	17.7622	16.7674	17.9723	18.8742	17.7607	18.1577	17.8524	17.9639	17.3695	17.9248
PLEC_HUMAN	Q6S381	Plectin	2	2	0.979948	-0.050186	0.0349996	-0.292804	0	--		11.5828	9.58893	10.2264		11.1944			11.0814	9.464							11.068			10.1052			9.53946	9.78411					11.1794						10.9765	10.6185
PSG6_HUMAN	Q00889	Pregnancy-specific beta-1-glycoprotein 6	29	8	0.440058	-0.125198	0.0154783	-0.291572	0	-	15.1738	14.5963	14.5214	14.2948	14.0209	14.5347	14.0544	14.0713	13.7864	14.5196	16.0428	14.4035	14.5777	14.7045	15.4833	14.1603	14.857	14.9344	14.4579	15.5827	14.3863	16.1781	14.5301	15.1828	15.0338	15.5021	15.8219	14.7136	14.3448	14.2341	14.6663	15.229	15.0593	13.5663	15.023	13.8577	14.2162	15.2221	14.7489
MNDA_HUMAN	P41218	Myeloid cell nuclear differentiation antigen	5	5	0.289585	-0.117022	0.00105891	-0.290346	0	-			13.3452	13.7873	13.3061	13.5225	13.3462	12.768	13.5548	13.3616	13.7279	13.7801	13.4524	13.7753	13.9859	13.4674	13.1353	13.4306	13.7665	13.3185	13.6436	13.1888		13.0778	13.139	13.9568	13.8261	12.6184	12.346	13.0988	12.759	13.2016	13.7239	12.3987	13.4429	13.0871	13.5397	13.464	13.3775
ACY1_HUMAN	Q03154	Aminoacylase-1	5	5	0.0249283	-0.448364	0.163452	-0.289822	-	0	14.7069	13.6712	13.0176	12.6174	13.8112	14.4523	13.1344	11.197	13.3458	12.6855	12.7569	13.6705	12.696	10.9577	14.3356	11.1883	13.8656	12.8194	12.1395	16.9405		13.2575	14.2813	13.2333	13.0452	13.9078	15.1216	13.4685		13.9741		13.6777		12.3353	12.9529	13.3904	11.4728	12.4181	13.3997
PROP_HUMAN	P27918	Properdin	15	15	0.932838	0.0214121	3.62e-05	-0.287953	0	-	12.5194	11.904	12.4185	12.2161	11.7142	12.0433	12.6069	12.4834	12.8362	11.942	11.7616	11.7576	12.7351	12.8457	12.5346	13.1345	12.1921	12.1863	12.2577	12.7947	12.3099	12.0557	12.0862	12.1097	12.1149	12.2004	11.7684	11.9137	12.2111	12.7765	12.5985	12.9563	12.4984	11.8119	12.3954	12.4547	12.5828	12.5113	12.4891
MET_HUMAN	P08581	Hepatocyte growth factor receptor	8	8	0.178984	-0.241709	0.0897702	-0.287105	0	0	12.8392		12.8861	11.6215	12.7486	13.1711	11.3702	12.355		12.9095	13.3501	13.1195	13.336	12.5256	12.9936	12.7652	12.6707	13.6217	13.8187	12.9392	13.6513			12.6091	13.2279	14.2916	12.8626	13.3103	13.9742	13.0718	13.1897	13.6252	11.8706	13.315			12.853	13.0156	12.3517
TBB1_HUMAN	Q9H4B7	Tubulin beta-1 chain	7	6	0.995924	0.021002	0.466087	-0.286492	0	0	16.2573	17.2325	17.3146	16.4757	17.418	19.076	15.7714	16.0752	16.959	16.1856	16.9082	16.9789	17.2679	16.5942	13.2996	17.2091	17.4493	16.6842	16.8849	15.1546	16.2266	18.0406	16.3197	16.6416	17.0607	16.9369	15.6858	13.2894	16.8265	17.1461	12.8683	19.144	16.7882	17.3092	17.3862	16.4239	16.8912	16.8733	16.283
ESTD_HUMAN	P10768	S-formylglutathione hydrolase	5	5	0.00398318	-0.424863	0.704125	-0.286156	--	0		11.9868				12.3765	11.1326					13.748			12.8693			11.1349				11.3002	12.3013	11.4593	11.8828		11.6717	11.7508		12.5596	15.4615	12.8941	11.9732				13.0783
PTPA_HUMAN	Q9NNZ7	Serine/threonine-protein phosphatase 2A activator	2	2	0.938906	-0.0379407	0.0396447	-0.282802	0	-	16.4676	15.0576	15.3488	15.713	15.1773	16.2228	16.6692	16.5182	16.2585	15.6327	14.5391	15.0144	11.9833	16.1947	14.9896	15.8911	16.0057	16.0714	16.1032	15.8561	15.8337	16.3093	15.9116	15.8909	16.6044	17.2317	16.2695	15.3844	16.2253	16.2806	15.9793	16.2182	15.4467	16.09	16.0384	15.2527	16.4156	16.057	15.1678
PUR4_HUMAN	O15067	Phosphoribosylformylglycinamidine synthase	2	2	0.873214	0.181458	0.591215	-0.281627	0	0			12.4941																			13.3368											13.4754
SPB6_HUMAN	P35237	Serpin B6	3	3	0.230732	-0.16686	0.0230939	-0.274985	0	-	13.3635	11.8439	12.5841	12.797	11.9541	11.7379	11.2317	11.6887	12.0068	11.5154	11.42	13.0037	12.029	12.246	11.4295	11.4305	11.8427	12.1026	12.3772	12.156	12.8768	12.868	11.8223	11.8185	12.2335	12.4971	13.5274	11.4301	12.2003	12.0303	12.7106	12.2874	11.8413	11.5259	15.0933	12.0813	11.7289	11.6772	11.8825
HSP74_HUMAN	P34932	Heat shock 70 kDa protein 4	4	2	0.346118	-0.173146	0.127693	-0.273339	0	0		11.0244		11.2062		11.9793		11.2147	11.5058		11.7828				10.8374					11.1881		11.075					10.9704		11.4602			10.6943	11.4945			11.2874
FBLN2_HUMAN	P98095	Fibulin-2	2	2	0.974549	0.0745097	0.646292	-0.272915	0	0		10.0292		9.87379		10.1721																										10.6397
SIG16_HUMAN	A6NMB1	Sialic acid-binding Ig-like lectin 16	2	2	0.0107622	-0.0469863	0.370077	-0.272469	--	0	14.4854	13.1591		13.462	12.4352		12.0151	15.5509	14.7976	12.5835		14.3248		13.1214	13.6071		12.3483	14.2262	12.9149	13.6985	14.7586	15.069	13.9126	14.4521		14.3498	14.3828	12.5979	15.3389	13.924		14.2848	12.7557		13.7658	15.665
PSG2_HUMAN	P11465	Pregnancy-specific beta-1-glycoprotein 2	22	4	0.537279	0.175307	0.223197	-0.271748	0	0	19.0243	19.11	18.8071	18.3985	17.8302	18.6782	19.3707	19.1562	17.6685	18.521	19.575	18.2544	18.3668	19.0888	19.2213	17.6607	18.737	19.0312	17.878	19.567	18.7234	20.271	19.0481	19.3025	20.6765	18.9857	19.7195	18.714	18.7877	18.7207	19.068	19.5426	19.4667	18.0902	20.4838	17.4516	17.4983	19.2682	19.1771
NEBU_HUMAN	P20929	Nebulin	2	2	0.791669	-0.172627	0.552697	-0.271365	0	0	20.3216	18.776	19.8573	19.1101	20.0795	20.5825	20.1387	20.4096	20.2919	19.9006	21.6071	19.3265	18.8607	20.2875	19.8079	19.3393	20.6641	20.2783	20.5581	20.3157	19.9417	19.1358	19.819	21.3085	20.6748	21.6705	18.5356	20.349	21.1981	19.1534	20.3564	20.6422	20.7448	21.1399	19.0687	20.0867	21.2268	20.832	19.0093
PSB6_HUMAN	P28072	Proteasome subunit beta type-6	2	2	0.0533504		0.440545	-0.267907	0	0																		11.0235		11.3908						11.5681
FCG3B_HUMAN	O75015	Low affinity immunoglobulin gamma Fc region receptor III-B	8	4	0.201964	-0.231454	0.0883782	-0.267587	0	0	10.5796	10.307	10.6833		10.4079	11.9735	10.7668	11.5772	11.9715	11.1772	11.6356		11.4423	10.8765	10.9406	12.2127	12.3965		11.3147	10.5434	10.8253	10.8866	10.3501		11.2841	11.8283	11.4011	10.4635	11.6947	11.4928			10.1869	11.4209		11.0822	11.7077
ERAP2_HUMAN	Q6P179	Endoplasmic reticulum aminopeptidase 2	7	6	0.0416363	-0.0385862	0.172728	-0.26645	--	0	12.9844	11.9075	11.2438	11.4695	12.4326	12.4747	11.5661	11.1117			10.7994		12.0066	12.8193	10.9841		12.6187	11.7987	13.0182	11.6215	11.4935	12.1276	12.015	11.3272		10.9978	12.236	11.254	11.1985	12.1215		12.0827	12.1306	10.9644	11.9367		11.3343	13.4731	9.01953
UN13D_HUMAN	Q70J99	Protein unc-13 homolog D	7	7	0.14102	-0.376249	0.315152	-0.26625	0	0								12.0445	11.2645	11.7502	10.8716			11.6893										11.504					12.5418			12.8829	11.2563	12.0494		11.8511			11.8794
1433B_HUMAN	P31946	14-3-3 protein beta/alpha	9	5	0.408513	-0.259909	0.336396	-0.265485	0	0	12.0182	12.3058	12.927	12.5011		16.9397	12.1108	11.3031	12.071	13.0137	12.2156	12.0566			10.5647					11.7738	12.8316	12.159	11.404	11.7672		12.3597	11.6602	11.7508				11.4707	12.2938	12.9462		12.7551		12.3028
PCSK9_HUMAN	Q8NBP7	Proprotein convertase subtilisin/kexin type 9	10	10	0.966488	-0.0497787	0.330873	-0.264538	0	0	10.9012	11.1626	11.3043	11.4667	16.415	11.8351	11.459	11.1667	11.3419	9.95486	11.7827	11.4549	11.9917		16.901		11.2789	11.002		10.5329	10.9977	11.7594		11.2255		11.4207	11.3997		11.6807	12.4171		12.1768	11.3057		11.6196	11.325	10.9126	11.773	11.7954
HRG_HUMAN	P04196	Histidine-rich glycoprotein	39	39	0.7854	-0.155658	0.490593	-0.264456	0	0	17.6696	18.1283	15.0719	14.2765	15.074	17.8138	14.981	16.2781	14.434	16.6861	12.8426	15.2731	14.4961	16.9012	16.8123	17.4744	16.2504	13.442	17.1581	17.5515	15.7289	16.0701	17.436	17.7855	16.5675	15.7005	17.222	14.3285	17.2049	15.7046	12.0548	16.3946	16.6087	16.5377	16.1435	14.6024	15.8115	16.6949	17.1936
IGDC4_HUMAN	Q8TDY8	Immunoglobulin superfamily DCC subclass member 4	3	3	0.627203	-0.11243	0.084035	-0.262056	0	0	10.6223	11.5796		10.5821	11.2136	11.1599		11.099	11.3086	11.0751		10.8789		11.2897	11.2924	11.1775	12.6262	10.9123	10.8974	10.9969						10.5444			10.8226	11.0988	11.1464	11.8498	11.6508				10.8686	11.43	11.5767
CO4A_HUMAN	Q6U2F8	Complement C4-A	269	11	0.666662	-0.0677046	0.00458949	-0.260877	0	-	18.8627	19.0119	20.0565	20.0438	19.1554	19.3115	19.997	19.2345	19.3643	20.0316	20.6013	19.8787	20.2743	19.4242	18.7445	20.3851	19.7702	18.8371	19.5928	19.2611	19.1581	19.3452	19.0142	19.841	19.5424	19.4371	18.9796	19.693	19.6985	19.5205	19.5156	19.3403	19.1246	19.064	19.5917	19.9766	19.9033	19.7105	19.0456
HBG1_HUMAN	P69891	Hemoglobin subunit gamma-1	8	1	0.139232	0.883606	0.827024	-0.260584	0	0	10.843	12.8239	10.8055	13.0733		20.4621		21.097	13.0337	9.76384	10.1643	12.7544	11.7355	13.3687	12.4788	12.4091	13.9017	10.5204	12.8117	11.2564	13.405	12.018	10.4177	12.1318	15.1587	13.2018	12.0611	11.8582	10.3955	14.5904	12.09		11.7332	10.524	11.5731	11.3977	10.241		16.8686
HBG2_HUMAN	P69892	Hemoglobin subunit gamma-2	8	1	0.139232	0.883606	0.827024	-0.260584	0	0	10.843	12.8239	10.8055	13.0733		20.4621		21.097	13.0337	9.76384	10.1643	12.7544	11.7355	13.3687	12.4788	12.4091	13.9017	10.5204	12.8117	11.2564	13.405	12.018	10.4177	12.1318	15.1587	13.2018	12.0611	11.8582	10.3955	14.5904	12.09		11.7332	10.524	11.5731	11.3977	10.241		16.8686
GALT4_HUMAN	Q8N4A0	Polypeptide N-acetylgalactosaminyltransferase 4	2	2	0.335148	-0.25099	0.310026	-0.260268	0	0	12.0464						11.2358			11.4531				10.2027	11.6399			11.4384	11.6019	12.3781	11.3843	11.5858			11.9052	11.5629	12.0456						11.749
ITIH1_HUMAN	Q01746	Inter-alpha-trypsin inhibitor heavy chain H1	116	116	0.544815	-0.0761262	0.00191358	-0.258963	0	-	17.9255	18.1804	18.0042	17.4517	17.9978	18.143	17.7828	18.2542	18.0766	17.7537	16.8738	18.2576	17.8793	18.0346	18.6237	18.6512	18.2593	18.1152	18.2289	18.5776	18.5633	18.1413	18.281	17.806	18.8844	18.5214	18.5899	18.1368	17.5266	18.425	17.7983	18.0929	18.4279	17.8992	18.7514	17.2554	17.6399	18.1029	18.081
APOA1_HUMAN	P02647	Apolipoprotein A-I	21	21	0.962997	-0.0376764	0.00106316	-0.258355	0	--	11.4856	10.4018	10.8199		10.1792	10.4679		10.866	10.6365		11.2952	12.7672	10.7095		10.2491	12.2198	9.79263	11.6497	11.6772	10.2411	11.3922	10.9872	12.0129	12.6492	10.6859	12.0999	11.7556		11.2519	11.3836		11.3916	11.0763	11.8955			9.89741	10.6753	10.7465
CO4B_HUMAN	Q96SA7	Complement C4-B	270	12	0.717111	-0.0604151	0.00473431	-0.256761	0	-	18.8662	19.0264	20.0565	20.0298	19.171	19.299	20.0078	19.0554	19.2931	19.9357	20.431	19.8868	20.1642	19.4242	18.7377	20.4168	19.7342	18.8441	19.5953	19.2611	19.1716	19.408	19.0142	19.89	19.542	19.4035	19.0057	19.693	19.7496	19.5205	19.6289	19.3391	19.1141	19.0188	19.6103	19.9766	19.9033	19.7347	18.9909
ATS8_HUMAN	Q9UP79	A disintegrin and metalloproteinase with thrombospondin motifs 8	2	2	0.409764		0.786698	-0.253979	0	0																											11.6733
COL12_HUMAN	Q5KU26	Collectin-12	3	3	0.698261	-0.132842	0.242377	-0.253748	0	0	12.6757	12.973	13.2146		12.481		11.186						12.7702	13.3777			12.8695	12.5457					12.3713		12.8319			13.2221		13.0966	13.529			13.8311		13.1546	13.4996	12.7673	12.603
PRDX2_HUMAN	P32119	Peroxiredoxin-2	18	15	0.949792	-0.0465832	0.227623	-0.253004	0	0	12.6726	13.5977	13.0397	13.8919	12.1003	16.2852	11.4269	15.1575	14.8972	13.0457	13.3505	13.4813	12.0113	13.1796	14.6396	13.5026	15.6265	13.7255	13.3374	12.0546	12.5969	13.6928	12.6897	13.8801	13.2386	15.3421	13.4229	13.5607	12.1603	15.1239	12.8564	12.6115	12.3093	12.2966	12.8497	12.5097	12.5304	12.5815	12.6346
MMRN2_HUMAN	Q9H8L6	Multimerin-2	5	5	0.571334	-0.177471	0.31559	-0.252615	0	0	15.6299	16.7654	15.3608	15.6777	16.1317	15.8235	14.6438	15.3553	15.8113	15.7957	14.4481	13.4877	13.428	16.5663	15.4498	15.9763	15.8606	15.4591	14.8722	16.1355	13.7987	16.1125	14.4723	15.296	14.9352	16.1209	14.9348	15.6325	15.4768	15.8938	15.2917	17.7118	15.6993	16.3437	15.8242	14.0518	15.7894	16.0898	16.7443
PSG9_HUMAN	Q00887	Pregnancy-specific beta-1-glycoprotein 9	34	15	0.845038	-0.068553	0.114446	-0.251763	0	0	15.2477	14.6174	14.6241	14.167	14.0209	14.4312	13.7332	14.1214	13.545	14.5254	16.071	14.3477	14.5777	14.8242	15.4806	14.1603	14.857	14.9616	14.5478	15.1707	14.276	16.476	14.5301	15.5535	14.8052	15.3816	16.0224	14.7136	14.2799	13.4032	14.6663	15.5914	15.2004	13.5663	14.7358	13.0245	13.9534	15.2221	15.1512
PRDX5_HUMAN	Q9UJU4	Peroxiredoxin-5, mitochondrial	6	6	0.771572	0.228942	0.0331461	-0.25162	0	++					12.4079
PSA1_HUMAN	P25786	Proteasome subunit alpha type-1	2	2	1	-0.197083	0.636057	-0.250865	0	0																											10.1994					11.3265
PLTP_HUMAN	P55058	Phospholipid transfer protein	5	5	0.805465	0.283812	0.864835	-0.249775	0	0											17.6696	19.0507	18.9862			18.5362															18.7005				19.08			18.3674
KNG1_HUMAN	P01042	Kininogen-1	103	103	0.496633	-0.0479684	2.91e-06	-0.24972	0	-	16.0138	15.8015	15.7497	15.4188	15.5337	15.3811	15.4803	15.9135	16.1261	15.3741	15.6493	16.0413	15.6702	15.5972	15.8652	16.0915	15.729	16.1304	15.9898	15.7249	15.7948	16.0761	15.6586	15.7959	15.636	15.833	15.664	15.7907	15.9947	15.7464	15.4445	16.0771	15.8551	15.5756	15.7581	15.4842	15.7505	15.6692	15.5651
HEP2_HUMAN	P05546	Heparin cofactor 2	62	61	0.325452	-0.0783579	5.61e-05	-0.248638	0	-	15.7728	16.2568	16.2854	16.322	16.1202	15.96	15.9225	15.9479	16.3928	15.7275	16.343	16.5036	16.2128	15.9959	16.3575	16.1194	16.0829	16.0516	16.0825	16.3681	15.8241	16.4352	16.3779	15.8392	15.9061	16.4793	16.2617	15.8922	16.269	16.2449	15.7328	16.1719	16.5133	15.8779	15.692	16.1155	16.2361	16.5079	16.1128
PROC_HUMAN	P04070	Vitamin K-dependent protein C	12	12	0.0132779	-0.209926	0.00241963	-0.246461	-	-	13.5185	12.9949	13.4183	13.4299	12.9953	13.1194	13.2202	14.0702	13.6742	13.5784	13.271	13.3395	13.2531	13.7786	13.5482	13.4103	13.3422	13.7195	13.7147	13.4847	13.5173	13.4098	13.075	13.191	13.504	14.5765	13.6076	13.0534	13.3369	13.2192	13.1861	13.8128	13.7838	13.5327	13.1198	12.9551	13.4779	13.2148	13.4072
THRB_HUMAN	P00734	Prothrombin	102	102	0.284265	-0.0780465	2.33e-05	-0.245616	0	-	18.3889	17.8895	18.3668	18.3724	17.8316	18.0643	18.2	18.2049	18.0584	18.5344	17.9041	18.2729	18.5257	18.0389	18.4484	18.3835	18.6419	18.3306	18.4649	18.2991	18.5811	18.6235	17.8136	18.0088	17.9411	18.6393	18.5213	17.747	18.1779	17.9129	17.8974	18.7787	17.7686	17.552	18.5782	18.0927	17.9552	17.9794	18.4841
RCN1_HUMAN	Q15293	Reticulocalbin-1	2	2	0.240731	0.237734	0.241237	-0.244901	0	0	12.2483	12.4731	10.496	11.4852	10.7621	12.4171	10.5862		12.3318	10.5601	11.1171	13.1648	11.7366	10.7495	11.7038	11.2703	11.7022	11.967	12.4067	12.3663	12.063	10.7924			11.106	12.0033	10.0936	11.0985	11.3606	12.2833	10.2829	12.6712	12.1546	12.5127		12.0732		11.1363	10.3458
ACTZ_HUMAN	P61163	Alpha-centractin	3	1	0.793056	-0.0684992	0.067712	-0.24111	0	0	13.9315	13.3628	13.0656	12.3888	12.5998	13.0691	13.8637	14.2589	13.6077	13.583	13.6379		13.8252			13.5077	13.6058			13.2477	13.5722	14.2959				13.5286	13.6605		13.6278	13.1476	13.403	13.5685		13.3305	13.12	13.3638	13.5595	12.2568	13.4987
ITB3_HUMAN	P05106	Integrin beta-3	2	2	0.829877	-0.125875	0.541035	-0.236762	0	0			11.0411					11.5334			12.2281	11.8167	11.7666		10.1671	11.7958	10.9073			11.2284	11.1564			16.9723	11.3917			10.9576	11.7187	11.3516		11.5656			11.473
CE295_HUMAN	CE295_HUMAN	CE295_HUMAN	2	2	0.897154	-0.116178	0.452614	-0.23632	0	0					10.7498					11.3503												11.613			12.5274			11.0188	11.5717	11.8073			10.905	10.834
CAH1_HUMAN	P00915	Carbonic anhydrase 1	14	14	0.840555	0.0947495	0.340249	-0.236186	0	0	16.6569	18.2661	17.7189	17.5809	17.0085	20.7751	16.2856	19.1028	18.7756	17.9598	17.3753	17.755	16.524	17.7926	19.3567	17.9949	19.9933	18.3119	17.9203	16.054	17.1005	18.9421	17.2523	17.9355	17.6757	19.6304	18.1548	17.9047	16.022	19.5355	17.1396	16.4265	16.0601	16.6177	17.5854	16.6476	17.3193	17.4642	17.3674
HABP2_HUMAN	Q14520	Hyaluronan-binding protein 2	33	33	0.56204	-0.0565008	0.000190504	-0.235042	0	-	12.751	12.9609	12.7189	12.7111	12.6468	12.6132	12.5683	12.549	12.9427	12.5823	12.5724	13.2603	12.4207	12.4801	12.5637	12.4718	12.5872	12.8895	12.6239	12.8585	12.6378	13.1394	12.8754	12.7013	12.1158	12.9428	12.9618	12.2332	12.3764	12.4605	12.1159	13.0571	13.1916	12.4044	11.9908	11.4598	12.3898	12.3292	12.9045
S10A6_HUMAN	P06703	Protein S100-A6	3	3	0.517981	-0.115162	0.0721177	-0.234278	0	0	12.8226		12.7348	12.5273	12.663	12.8159	11.8065	12.6363	13.506	13.2947	13.5104	13.7244	13.3437	12.5938	12.6576	12.7893	12.6141	13.4635	13.3061	12.9464	13.0723	11.6866	12.9165	13.1406	12.9159	13.3427	12.5099	12.0197	13.1333	12.4926	12.8138	14.3183	13.349	12.9853	12.0468	11.8168	13.0815	13.0661	12.515
PHLD_HUMAN	Q96ID6	Phosphatidylinositol-glycan-specific phospholipase D	38	38	0.500073	0.078519	0.0039854	-0.233058	0	-	12.8508	12.4872	12.208	12.6999	11.8766	12.1945	11.7872	12.7635	13.323	12.3399	12.8804	12.7326	11.8197	12.6481	13.1121	12.309	12.7242	12.897	12.4001	13.3896	12.4994	12.7872	13.1238	12.7072	13.1226	13.071	12.7102	12.2055	12.9674	12.7039	12.2986	13.0094	13.3889	12.8543	12.396	12.1607	12.5579	12.4863	11.9087
HNRPC_HUMAN	Q86U45	Heterogeneous nuclear ribonucleoproteins C1/C2	2	2	0.19861	-0.321497	0.456789	-0.232638	0	0	12.4468					12.4101		12.4467	12.8375		13.1099	13.1046			13.4364		12.928		11.8889			11.8311		12.5012	12.0822					13.3857		13.0577	13.2413				13.0801	13.1175	12.4996
EGFR_HUMAN	Q9GZX1	Epidermal growth factor receptor	6	6	0.860106	-0.126186	0.662491	-0.232256	0	0				12.2736		12.273		12.7979			12.8582						13.464		12.4274	11.4522	11.5542			12.0223										11.3096		12.7857	11.9246
DZIP1_HUMAN	Q86YF9	Zinc finger protein DZIP1	3	3	0.977459	-0.0390807	0.470305	-0.230048	0	0						10.1887	9.49308			9.50521	10.2471			10.1711	10.0179	10.5554		9.95322		10.4106			10.3234	10.1086			10.1025					10.6007	10.6796		10.6551	10.3102			10.0904
PSG11_HUMAN	Q9UQ72	Pregnancy-specific beta-1-glycoprotein 11	14	4	0.999014	0.00597271	0.241222	-0.229864	0	0	16.4172	17.283	15.5738	15.2617	15.374	15.7949	16.4589	16.5761	15.9749	15.9315	17.8759	15.8008	15.7898	16.6785	16.5911	15.0316	16.1573	16.3901	15.8459	17.9447	16.0595	18.3772	16.72	16.6105	17.7418	16.9401	17.5098	16.7741	16.74	16.0534	16.1345	17.4339	17.1574	16.4059	16.838	14.8445	16.0435	16.9797	15.7013
CNN2_HUMAN	Q99439	Calponin-2	5	4	0.958658	-0.0718042	0.658011	-0.228768	0	0						11.0734				12.5905					12.5545				13.5439	12.9659	12.5763		12.2707			14.0225	12.3097	11.9328	13.6921		11.3526			12.295
MANBA_HUMAN	O00462	Beta-mannosidase	3	3	0.60551	-0.199249	0.42656	-0.228226	0	0	16.665			18.0752		17.693		15.4499	16.1766		16.7233	16.2181	16.0479	17.3831	16.2398							18.1659			17.1994				18.0157	17.9626		17.9971		16.3899
HNRPD_HUMAN	Q9UCE8	Heterogeneous nuclear ribonucleoprotein D0	3	3	0.152613	-0.516911	0.58556	-0.228119	0	0																11.7834												11.1968								11.3471
UBF1_HUMAN	P17480	Nucleolar transcription factor 1	3	3	0.770878	0.0620535	0.0886393	-0.227824	0	0		11.3952	10.7844	11.1955		11.1133	11.2051							11.1414			11.2205			11.3751					11.7945														11.1912
PGM2_HUMAN	Q96G03	Phosphoglucomutase-2	4	4	0.597255	0.327633	0.770609	-0.227474	0	0		11.2459		10.9146		11.6062
LCAT_HUMAN	P04180	Phosphatidylcholine-sterol acyltransferase	7	6	0.998373	-0.0130401	0.601651	-0.227243	0	0	11.7264							12.1037	11.3101		12.6407				11.9505					11.8369		12.1922		11.2284	11.6375	12.5104	11.3006		12.129					11.7446		11.9189
MAOX_HUMAN	P48163	NADP-dependent malic enzyme	2	2	0.393916	-0.317141	0.671441	-0.226318	0	0	14.7778	12.8973	11.7749		12.2538			11.8306			12.5926			11.9873	12.1236		13.1059		12.8719	13.2263	11.7972			13.2958		13.0443	13.1542		11.938	12.8856		13.3865			14.3115				12.0517
FBN2_HUMAN	P35556	Fibrillin-2	12	9	0.931341	-0.0886199	0.585081	-0.224937	0	0	9.96575		11.4104	11.9756		12.201	11.7826	12.0782		9.83196		11.6494		12.3626	10.1236		11.8391	11.8502	11.8517	11.7041		12.0969		11.5817					11.4189						12.2163				11.3449
SNX3_HUMAN	Q5JXJ8	Sorting nexin-3	2	2	1	0.084638	0.524988	-0.223908	0	0
GSLG1_HUMAN	Q92896	Golgi apparatus protein 1	2	2	0.860504	-0.244365	0.846445	-0.223684	0	0			11.7805	11.1449						13.2107											13.1785				13.6751							13.6685
FCN3_HUMAN	O75636	Ficolin-3	20	20	0.461854	-0.100612	0.0277159	-0.22277	0	-	14.9899	14.7778	14.5874	15.2346	14.1921	14.3709	14.2661	15.5757	15.3322	14.6487	15.3876	15.2555	16.0873	13.1985	15.1285	15.0849	15.2844	15.2753	14.5177	15.1285	14.9245	14.1978	13.52	14.6002	14.7509	15.1836	14.4345	14.5349	14.3271	15.7023	15.2448	15.3241	15.2575	15.3824	14.6392	14.9768	14.9912	15.3778	15.1915
GGCT_HUMAN	O75223	Gamma-glutamylcyclotransferase	4	4	0.327446	-0.199757	0.262614	-0.221429	0	0	15.9402	15.4971	16.8747	16.8567	15.9582	16.4657	16.9098	16.741	16.4254	16.4132	17.9377	16.7199	17.3289	16.3115	15.2318	17.53	16.8132	14.0335	15.1983	15.9797	14.4901	15.9863	15.719	16.6073	16.2714	16.871	15.5959	16.4879	16.9039	16.4775	16.1394	16.5547	15.2925	14.4013	16.2963	17.112	16.8997	16.6233	16.0961
NRP2_HUMAN	Q9H2D5	Neuropilin-2	4	3	0.938059	-0.0458066	0.199642	-0.22096	0	0	14.0897	12.1088		11.7554		12.057		13.5699	12.6432	12.7385	12.3607	12.4671		10.5812	12.2485	12.0686	12.3047	11.5542		13.2339	12.4893	12.3843		12.5581		13.5399	13.0291		12.995	12.0315		13.3613	12.1403	11.984		11.2199	12.3831	12.1192	12.1159
CSTN1_HUMAN	O94985	Calsyntenin-1	2	2	0.586089	-0.301589	0.685077	-0.219537	0	0			14.7014	11.7396	16.4545	15.0648				15.7087	15.1609			14.7707			14.7631	15.6533	15.6332	14.9336				15.2854				15.6729	16.1329		15.7219	16.1543	14.7456	15.6872		11.5571	14.8334	15.2606
SEM4B_HUMAN	Q9NPR2	Semaphorin-4B	7	6	0.218327	-0.413235	0.588879	-0.218836	0	0	16.2631		15.2651	16.383	16.1979	15.4668	15.3831	16.1715	16.7316	15.6214	14.4404	15.3506	14.7603	14.0057	14.2413		15.6458	15.2239	17.3053	16.2916	13.7979	15.8736	17.1341	16.184	16.3102	16.9425	16.0161	14.0776	15.788	16.5179	14.5569	15.3833	16.8977	15.8728	15.4042	14.4827	16.3659	16.9304
COL11_HUMAN	B2R9M5	Collectin-11	9	9	0.220362	-0.231863	0.246882	-0.218331	0	0	10.9674	10.7464	11.0397	15.2065		11.035	15.9524	11.1861	10.9924		11.3943	11.0008		10.6836	11.1294	11.3418				11.0055	11.0488	11.0896	10.7991	11.2016	11.8814	11.6598	11.5738			13.4852		11.3324	11.2005	11.2949	11.1718	10.0753	11.0717		10.9918
PARK7_HUMAN	Q99497	Protein DJ-1	6	6	0.00490748	-0.540541	0.36366	-0.216585	-	0	14.4779	14.5613	13.1208	14.5058	12.5649	14.86	13.1369	12.8328	13.0637	13.4735	12.912	14.271	13.2591	14.8533	12.4555	14.2488	13.8179	12.9012	12.7004	12.7074	14.1931	13.847	12.8687	14.5066	12.092	12.9012	14.9312	12.3136	13.5817	12.5083	14.1676	14.3543	14.6183	14.3893	13.047	14.233	13.4591	14.318	14.5163
GNAI3_HUMAN	P08754	Guanine nucleotide-binding protein G(k) subunit alpha	2	1	0.0533504		0.440545	-0.215673	0	0											12.6291									10.2938				10.3674
GSH1_HUMAN	P48506	Glutamate--cysteine ligase catalytic subunit	3	3	0.870223	-0.0737989	0.395	-0.215388	0	0											10.9078			10.5313							10.1226			10.8393												10.8236
IF4A1_HUMAN	P60842	Eukaryotic initiation factor 4A-I	6	1	0.445979	-0.31081	0.666154	-0.214707	0	0	12.0651	15.3489	15.3891	11.9207	17.3719	15.7145	13.1154	15.3489	14.2472	15.2724	16.5468	16.2578	14.3881	13.4181	15.4619	13.2547	16.3422	13.227	12.9964	12.3104	12.9187	13.97	14.2201	13.7605	15.5541	15.9998	11.6634	15.7194	17.2546	13.5254	12.8501	16.217	15.9278	15.7259	14.8026	15.791	16.946	15.8646	13.4921
COG4_HUMAN	Q9H9E3	Conserved oligomeric Golgi complex subunit 4	2	1	0.459938	-0.129655	0.12892	-0.21455	0	0	14.5626	13.988	14.616	14.3213	14.9414	14.5758	14.3579	15.0996	15.3788	15.9054	15.8391	14.8169	15.1281	14.6444	14.1016	14.3033	15.1734	15.0582	15.2605	15.194	14.3921	13.8747	14.3855	15.3381	14.7796	15.4518	14.003	14.6038	15.6104	15.2171	15.209	15.0487	15.0383	15.644	15.0545	15.5062	15.7857	15.3565	13.7375
CNTN3_HUMAN	Q9P232	Contactin-3	4	4	0.125352	-0.173419	0.0416909	-0.214356	0	-		12.2793	12.1896	12.4932	12.7174		12.7316	12.5273	13.505	13.1965	13.4878	12.4257	13.7619	12.4203		13.0603	12.6869	13.2724	13.1093	12.7575	12.9124	12.0308	13.1399	12.7803	12.6118		12.7605	11.8763	12.9901	12.5875			12.4693	12.6007		13.1178	13.3734	12.7709	12.7443
CLUS_HUMAN	P10909	Clusterin	67	67	0.730608	-0.0353041	6.55e-05	-0.214238	0	-	18.1124	18.054	18.5065	17.8483	17.903	17.8702	18.0067	18.2358	18.6033	18.1616	17.7776	18.3473	17.8161	17.8953	18.0786	17.9701	18.2038	18.4324	18.5116	18.4013	18.2376	18.2199	18.3383	17.8749	18.3497	18.4107	18.5234	17.9222	18.1659	18.3558	17.8617	18.3501	18.318	17.8268	18.1825	17.7996	18.0171	18.152	18.4943
FGFR1_HUMAN	Q9UDF2	Fibroblast growth factor receptor 1	2	2	0.0191603	-0.412536	0.290211	-0.213446	-	0	13.6557	13.1866	12.1946	11.2775	12.3586	13.4489	11.5655	10.5112	11.3401	11.4081	11.121	12.1245	11.2289	10.2209	11.8814	10.462	12.668	11.9983	10.6991	12.0816	12.4938	13.3934	13.3267	11.848	11.9643	12.1928	13.4272	12.5636	11.4418	13.1992	9.7161	13.005	12.9901	11.1701	12.6554	11.433	10.7648		12.6469
ANT3_HUMAN	Q9UC78	Antithrombin-III	117	117	0.0239423	-0.142456	0.000367466	-0.210599	-	-	19.5282	19.2096	19.4265	19.0417	19.1897	19.5337	19.237	19.5644	19.6748	19.6243	19.428	19.5567	19.5991	19.3091	19.6735	19.5555	19.5127	19.5051	19.5571	19.5783	19.1346	19.4051	19.3055	19.357	19.561	19.6739	19.0584	19.0233	19.6078	19.5044	19.1842	20.1226	19.4294	19.2582	19.6675	19.2188	19.5157	19.3459	19.4508
GSH0_HUMAN	P48507	Glutamate--cysteine ligase regulatory subunit	2	2	0.533483	-0.15639	0.381786	-0.210345	0	0	11.8448	10.9196				12.3549		11.9579	12.2069		11.4282				11.1343	10.7946	12.5495		11.3372	10.6895	10.8169	11.3142					12.0297		11.7472			10.7295					11.8189
H2AY_HUMAN	O75367	Core histone macro-H2A.1	2	2	0.226199	-0.176183	0.111448	-0.209897	0	0	16.04	14.5697	14.3235	13.906	15.177	14.5039	14.921	15.8325	16.3238	15.6757	15.6229	15.652	16.4915		15.3728	15.2662	14.9866	15.7993	15.8539	15.2077	15.6252	15.2768	15.5144	14.9662	15.5884	15.6423	14.9433	14.7301	15.8603	15.0897	14.9354	15.2147	15.3582	15.6474	14.9746	15.4188	15.6227	15.2301	15.0428
ITA1_HUMAN	P56199	Integrin alpha-1	3	3	0.996	-0.0363684	0.877658	-0.208244	0	0	15.5838		10.5621	10.8861		11.7013	11.2364	13.0832		10.6537	10.1202		17.3051	10.1063	10.4596		10.1195	10.7599	10.6332	10.7117	10.6046		9.67739	11.0939	10.9565	11.0991	10.6074	10.8167	10.8168	10.9359		11.2242	10.2272		11.1783	10.9515			10.5726
LIMS1_HUMAN	P48059	LIM and senescent cell antigen-like-containing domain protein 1	3	3	0.786303	-0.144625	0.587415	-0.207925	0	0			11.9467		11.275	10.6639	11.6845	12.0101		12.3308	14.1108	11.7664	12.6373	11.5594	10.3011		11.7621		10.4416	10.3658	10.0008							11.7192	12.7595		11.4508			10.5156	11.8118	12.8276	12.6161	12.1438
AMPB_HUMAN	Q9H4A4	Aminopeptidase B	4	4	0.728802	0.116866	0.352343	-0.207814	0	0	12.1508	13.1318	11.8429	12.6125	11.3713	11.9967	10.7645	11.4753	12.2365	13.0065	12.2975	12.191	12.963	13.3308	12.4128	13.9442	12.6658	12.1336	12.1096	12.4788	11.8084	14.7555	12.1279	11.4992	13.1345	13.9639	12.5309	12.2678	13.1863	12.3066	11.3536	13.121	12.5253	11.0339	14.1569	11.6339	12.2415	13.6531	12.7012
NOL8_HUMAN	Q7L3E2	Nucleolar protein 8	2	2	0.800343	0.140495	0.740596	-0.207148	0	0		10.9357									10.5321								10.832				9.69324	10.3461		10.4388	9.464	9.95114		10.1631			11.7802	9.14595	10.6864		10.3352
SPON2_HUMAN	Q9BUD6	Spondin-2	2	2	0.010491	-0.428063	0.302342	-0.206165	-	0	13.3998	12.1874	10.9205	10.8162	12.4332	13.2486	11.8074	10.7769	12.4113	11.4811	11.6876	11.7698	11.992		11.7018		12.9266	12.1123	11.1696	10.9821	11.962	12.2255	13.5657	11.9277	12.2259	12.3934	12.6378	11.7999	11.9131	13.0103		13.321	12.4513	11.3388	12.4691	11.9717	11.0981		12.1363
PRL_HUMAN	P01236	Prolactin	5	5	0.173745	0.320005	0.48759	-0.206073	0	0	11.2815	12.7616		10.3583	11.1235		11.0529	11.6601		11.6713	12.4951	11.8588	11.5336	11.6774	11.6957		11.5155	11.6351	13.3945	12.4466	11.6798	11.0396	13.2314	13.186	14.7249	11.5301	12.4031	11.7754	11.7713	12.2571	10.805		14.9792	11.6397	12.3254		12.4159	11.8144
CD248_HUMAN	Q9HCU0	Endosialin	4	4	0.0361624	-0.668391	0.664046	-0.205021	-	0	11.7093			11.5832							12.1754			12.4056	12.861			12.3854		11.7471		11.836		11.2299								13.0769				11.7115			11.6054
DAG1_HUMAN	Q14118	Dystroglycan	3	3	0.439885	0.22778	0.493768	-0.204351	0	0	11.7946	11.8715		11.7865		12.7374		12.6516	12.7292		11.9251			10.5783	11.1252		13.6569	11.6444		10.4615	12.2315			11.6261		12.2489	11.2411		12.7994	11.8287			11.9707			12.4071	12.411		11.15
NID1_HUMAN	P14543	Nidogen-1	19	18	0.998908	0.00516796	0.174637	-0.203975	0	0	10.2241	9.08718	9.70773	10.1868	10.5773	10.3904	9.89103	9.92755	10.0712	10.4651	10.6384	10.8992	10.6597	10.1727	9.62497		10.3794	10.2741	9.68399	10.025		10.9809	10.5888	10.8013	10.3335		10.279	10.6879	10.0571	10.7495		10.7961	10.5891	10.2408		10.2095	11.1188	10.6179
FCG3A_HUMAN	P08637	Low affinity immunoglobulin gamma Fc region receptor III-A	7	3	0.608627	-0.118478	0.201336	-0.201621	0	0			11.0634		10.594	12.1556	11.0229	11.522	11.954	11.3209			11.6984	10.9873	10.8885		12.4224		11.2868	11.0837	11.1711	11.1427			11.5626	12.5661			12.3215	11.7016			10.2333	11.5492		11.7773
VAT1_HUMAN	Q99536	Synaptic vesicle membrane protein VAT-1 homolog	2	2	0.334091	-0.329994	0.546608	-0.201044	0	0			10.4382						10.4737			11.0704																					10.7488
TCPZ_HUMAN	P40227	T-complex protein 1 subunit zeta	2	2	0.0080478	-0.483157	0.391889	-0.19878	-	0	13.8143			13.9666	14.3135		13.1175			14.4709		13.4833		13.7077	14.4536	13.3911	13.7883	14.368		13.8787	13.7102			13.3202	14.2598	14.4653		13.1163	14.1056		13.3671							13.8671	13.7538
IGF2_HUMAN	Q9UC68	Insulin-like growth factor II	8	7	0.974976	-0.0159969	0.0298595	-0.197342	0	-	13.9978	13.6182	13.163	13.3919	13.4261	13.1038	13.3762	14.6736	13.3278	13.098	13.8106	14.2914	13.9672	14.2955	13.9117	13.999	13.6122	14.2179	13.6814	14.649	14.2124	13.3144	13.8366	13.6673	14.194	14.3585	13.7606	13.6605	13.2951	13.7203	13.8072	14.106	13.6568	14.0938	14.4895	13.716	13.857	13.7538	13.6688
ICAM1_HUMAN	P05362	Intercellular adhesion molecule 1	7	7	0.571177	-0.136458	0.321733	-0.196982	0	0	14.7164	13.9576	14.832	13.8539	14.1417	14.3086	14.4467	14.1261	14.5975	14.4409	14.6199	14.4294	14.3609	13.9014	14.4802		14.7129	13.9461	14.2115	14.6219	13.8717	14.9358	14.5305		14.4243	14.3746	14.2456	14.0515	14.4611		14.0973		14.5522	14.0397	14.6255	14.7451	14.5755	14.3292	14.041
GP1BA_HUMAN	P07359	Platelet glycoprotein Ib alpha chain	10	10	0.999432	0.00385694	0.243461	-0.196281	0	0	14.6091	14.9289	13.889	13.986	14.4595	14.849	16.644	15.5468	15.1224	13.7466	15.3449	15.2975	14.5695	14.7076	14.4111	14.6359	15.6462	14.1203	14.6262	14.5803	14.2983	15.8339	13.3965	14.683	14.6191	15.6838	13.1575	14.3944	15.5249	15.2748	15.3347	15.238	14.9249	14.492	15.5894	14.859	14.9661	14.9673	15.2396
IGHG3_HUMAN	P01860	Ig gamma-3 chain C region	9	3	0.00119765	-0.483855	0.274644	-0.194549	-	0	14.4643	13.4974		13.1916	12.9605	13.1367	12.8105	11.166	12.6693	12.11	12.3589	13.1549	13.9881	11.1282	12.3219		12.8948	12.3182	11.4113	11.9813	12.9194	13.3272	14.0459	12.8048	13.093	13.2939	12.7247	12.8609		13.7371	11.4388	13.4965	13.3232	11.4078	12.9776	13.4153	11.5255	12.2204	12.647
NPC2_HUMAN	P61916	Epididymal secretory protein E1	4	4	0.609415	-0.123517	0.310411	-0.193144	0	0	11.9827	12.8208	11.9177	11.9037	11.0573	12.3362	11.292	12.3211	12.9614	12.0969		12.4308	11.8134	12.2003	12.0239	12.26	12.4088	12.0721	12.1953	11.7829	12.1216	12.2049		12.0705	12.3533	12.9874		11.4949		12.8822	12.3975	12.5551	12.2103	12.7581	12.6803	12.3561	12.535	12.2701	12.5099
HEMO_HUMAN	P02790	Hemopexin	152	152	0.249918	-0.0641278	2.18e-05	-0.192408	0	-	19.3523	19.3699	19.2354	18.8125	19.1783	19.3416	19.5841	19.664	19.7392	19.4768	19.2629	19.3905	19.5671	19.7067	19.9408	19.4723	19.773	19.5523	19.7474	19.637	19.2806	19.6306	19.2286	19.3074	19.625	19.3652	19.1755	19.381	19.3775	19.5318	19.6354	19.8126	19.4237	19.5861	19.8123	19.3758	19.3649	19.5671	19.4423
IF2G_HUMAN	P41091	Eukaryotic translation initiation factor 2 subunit 3	2	1	0.529691	-0.15856	0.342672	-0.190455	0	0	11.54	10.9936	10.7574		10.7465		9.98981		9.66934	9.35613	9.97589	10.5564	10.2338							10.2246	9.9675		11.5287			10.2681	10.8764	10.5708		11.3725				9.32882	11.0504	10.1758	9.64164
FN3K_HUMAN	Q9H479	Fructosamine-3-kinase	2	2	0.983304	-0.0649525	0.855571	-0.188626	0	0		13.7428	13.6784	14.712		15.0537	15.5248	11.0962									14.7326	12.422		11.3119	11.906	13.654					14.0499			14.4171		15.1765
MASP2_HUMAN	Q9H498	Mannan-binding lectin serine protease 2	18	18	0.302723	-0.103381	0.0220502	-0.188471	0	-	13.2681	12.9516	12.2468	12.7165	12.1427	12.9364	11.3156	12.9272	12.435	12.6088	12.8561	13.24	13.3012	12.7583	13.068	13.1039	12.2817	12.8232	12.1202	12.8502	12.7816	12.9693	12.4798	12.7284	12.3529	13.056	12.9228	12.5182	12.094	12.9141	12.7945	13.1374	13.3139	13.0975	12.9185	11.9307	12.0641	12.8062	12.632
ATM_HUMAN	Q13315	Serine-protein kinase ATM	2	2	0.190931	0.251548	1	-0.187794	0	0										10.4566
ERAP1_HUMAN	Q9NZ08	Endoplasmic reticulum aminopeptidase 1	6	5	0.990311	-0.0297817	0.686155	-0.187395	0	0			11.411	11.416		11.4975		11.1057	11.7993		10.8373	7.31455			11.1858			11.8366		11.6594	11.5314	12.1655	11.2215			12.6796	12.2181		11.4327			12.2961	11.3392		12.1007		11.5818
UBA7_HUMAN	P41226	Ubiquitin-like modifier-activating enzyme 7	2	2	0.999442	0.00360995	0.219933	-0.187137	0	0	11.7242	11.759	11.5235			11.4989		11.0926	11.2283	12.1254				11.8554	12.0482					12.3908	11.1709	11.8818	11.4143	11.105			11.464			12.1219			11.5214	11.468		10.901
MYO1E_HUMAN	Q12965	Unconventional myosin-Ie	2	2	0.999521	0.00358532	0.256131	-0.186647	0	0	12.1765	12.7191	11.9482	11.1978	11.7172			13.5982	12.62		12.2671			11.8587	11.7601	12.9838	12.2918	12.3935	12.2061	12.2108	15.9578	12.3815		12.2575	12.0575	12.916	11.3053	11.8202	12.8409	12.6491			12.9142	12.8758	12.5156	11.9349	12.9957	12.561	12.5898
APOH_HUMAN	P02749	Beta-2-glycoprotein 1	59	59	0.762954	-0.0506609	0.0333606	-0.186619	0	-	16.9584	16.3468	16.2564	15.3339	16.7175	16.2006	16.4138	16.6696	16.5269	16.4571	15.6697	16.4353	17.1512	16.3738	16.6301	16.751	16.1003	16.4491	16.3526	16.1455	16.3547	16.6497	16.9077	16.3181	16.0399	15.6208	16.5866	16.4339	16.1697	16.2205	16.4212	16.6256	16.7298	16.5292	16.4219	16.2158	16.5603	16.3751	16.4993
ITA5_HUMAN	P08648	Integrin alpha-5	2	2	0.267648	-0.348075	0.600442	-0.185	0	0		10.1				10.3538						10.7172																				10.8797
SH3L1_HUMAN	O75368	SH3 domain-binding glutamic acid-rich-like protein	3	3	0.922913	0.0386033	0.170104	-0.18473	0	0	15.3211	16.1754	16.9798	16.8592	15.6603	15.5733	16.794	16.7507	16.7342	16.6203	17.901	17.094	17.4624	16.3644	15.2596	17.5194	16.6686	15.6385	16.6433	15.7902	16.0627	16.0858	16.3285	17.0498	16.5501	16.849	15.365	16.6139	17.1008	16.4586	16.7113	15.8534	16.0186	16.0667	16.4708	17.3029	17.2739	17.2561	15.7936
SEM4A_HUMAN	Q9H3S1	Semaphorin-4A	2	1	0.817568	-0.0394679	0.0173253	-0.184303	0	-	14.9185	14.3006	14.492	14.3537	14.0159	14.0205	14.1677	15.1439	15.2059	14.5385	14.27	14.6812	13.6957	14.1333	14.5772	14.0347	14.3299	14.8421	14.462	14.5268	14.5275	14.541	15.1691	14.676	14.7513	15.0723	15.1083	13.7317	14.8202	14.972	14.0941	15.0082	15.1977	14.5854	14.3217	14.5308	14.5892	14.157	14.5778
DNM1L_HUMAN	Q9Y5J2	Dynamin-1-like protein	9	9	0.327906	0.191305	0.315903	-0.184093	0	0			14.1062	14.4238		13.7995		14.7703		13.9201	13.903		14.0736		14.2062		14.9122			14.0443		14.3832				14.1083	14.5191	14.2965	14.0149			13.8903
EXTL2_HUMAN	Q9UBQ6	Exostosin-like 2	5	5	0.244074	-0.155886	0.129807	-0.180898	0	0	10.3288	10.4397	10.1826	9.79689		10.5771	10.0524	10.0929	10.6913	10.1665	10.8175	10.9626			10.2497			10.6971	10.1526	10.6505	10.0939	10.2076	10.3073	9.44534	11.0742		10.3244	11.025	10.5626	10.2966	11.4533	10.3488	10.3585		10.7703	9.95447		10.2065	10.1708
PGAM1_HUMAN	P18669	Phosphoglycerate mutase 1	13	6	0.996603	0.00596789	0.0602733	-0.179261	0	0	16.0513	15.7385	14.95	15.7532	15.5079	15.3815	14.9819	16.1113	15.7331	15.1397	14.8999	16.2692	15.8178	15.8467	15.9626	16.1745	17.0855	15.2205	14.6159	15.6407	15.7063	15.9187	15.6451	15.0282	15.1372		15.0556	15.9065	15.1131	15.6625	15.937	15.1695	15.2731	15.2231	15.8985	15.4288	15.3336	15.9012	15.2879
ATL4_HUMAN	Q6UY14	ADAMTS-like protein 4	2	2	0.153583	-0.15928	0.0896397	-0.178416	0	0	16.4026	15.3763	15.6934	15.2968	15.6738	15.4795	16.0444	17.2213	16.5485	16.1378	17.0935	15.624	16.1012	15.3487	15.7533	16.5947	16.0885	16.4567	16.4259	15.8344	16.2477	16.6556	15.7672	16.2001	16.2196	17.162	15.7708	15.6896	17.0845	15.4787	15.4864	15.9621	16.0563	16.8236	15.2384	16.0746	16.3387	15.8144	16.2122
HPRT_HUMAN	P00492	Hypoxanthine-guanine phosphoribosyltransferase	5	5	0.310668	-0.197583	0.344538	-0.177977	0	0	12.3432	12.6391			12.013	12.4907		11.1177	11.867		12.8431	11.9391			11.5357		12.5635				11.6077	12.7194	13.0123	12.177		12.3227	11.5831	11.5654	12.7944	12.5868				10.9797			11.9139
RINI_HUMAN	P13489	Ribonuclease inhibitor	9	9	0.615642	-0.155285	0.622782	-0.177613	0	0		10.8978							10.4664		11.1023										10.1802		10.4304			10.8039						11.6233	11.3039	10.0404			10.3408		10.7575
ENOG_HUMAN	P09104	Gamma-enolase	5	3	0.980009	0.0304279	0.498906	-0.17681	0	0		12.238	11.6608	11.3406	11.8457	13.4824	11.5363	10.8538	11.1143	11.2073			11.9581		11.566		14.2753	10.212		12.4828	11.0209	11.2223	11.0544	11.8568		10.8324	10.8641	11.7132		11.6984		13.6132	11.0284	10.7799	11.5984	12.2054		11.7449
UGGG1_HUMAN	Q9NYU2	UDP-glucose:glycoprotein glucosyltransferase 1	2	1	0.913791	0.0905794	0.839158	-0.176483	0	0									10.5656																												10.2816
OBSCN_HUMAN	Q96AA2	Obscurin	2	2	1	-0.119649	0.754696	-0.176428	0	0	11.0609																						11.7202
SHBG_HUMAN	Q6ISD2	Sex hormone-binding globulin	32	32	0.523761	-0.0951091	0.116075	-0.175219	0	0	17.5845	16.7933	16.3139	16.6238	16.2595	16.6897	16.5877	17.1664	16.4605	16.3602	16.448	17.3263	16.0782	17.1083	16.6054	16.0503	16.7634	16.8922	16.6069	17.0527	16.3622	17.1917	16.5402	17.23	16.2666	16.7337	16.9337	16.2721	16.6235	16.1914	16.4601	17.1996	17.0094	16.5816	17.2337	16.0809	16.1888	16.1649	16.5241
ANXA5_HUMAN	P08758	Annexin A5	8	7	0.885541	-0.0534136	0.0165933	-0.172727	0	--	11.1189	11.5471	11.2333	11.5509		11.2676	11.3189	11.9228	12.1381	10.4803	12.051	11.6179	11.6464	11.7867	11.7897	11.9046	11.3673	11.034		11.3274	11.4117	11.4174	12.4047	11.5001	10.7888	13.2866	11.2716		12.1567	11.3881	11.7943	11.63	11.6406	11.9236	11.0997	11.2343	11.8957	11.9479	11.0772
SIAE_HUMAN	Q9HAT2	Sialate O-acetylesterase	2	2	0.673304	-0.256456	0.898619	-0.172454	0	0															10.6962													11.3532
VGFR3_HUMAN	P35916	Vascular endothelial growth factor receptor 3	15	15	0.037905	-0.196261	0.0748092	-0.171688	-	0	12.7751	13.3841	13.7952	13.7376	13.7224	13.4134	13.0743	13.3262	13.5015		13.449	13.6384	13.6581	13.0704	13.6581	13.4963	15.0861		13.6532	13.2247	12.9642	13.2926	12.9952	13.2132	13.5326	12.8631	13.2735	12.8369	13.4978	13.2092	12.8102	13.2939	13.2718	13.1847	13.5351	13.0902	13.8508	13.4383	13.4315
HSP72_HUMAN	P54652	Heat shock-related 70 kDa protein 2	10	1	0.284584	-0.273628	0.547434	-0.171203	0	0	15.2168	15.2213	15.8228	15.5295		15.3759	15.8452	15.6956	16.0059		17.1095	15.7249	15.5863	15.1711	15.636	14.8701	16.2287	15.842	17.4372	17.1436		14.8957	15.4886	17.1814		16.6128	14.324		16.8698	15.0612	15.6845	17.0119	15.1072	16.298	14.6762	16.4749	16.8056	16.1271	14.3832
MYLK_HUMAN	Q5MY99	Myosin light chain kinase, smooth muscle	4	4	0.179248	-0.275145	0.413362	-0.169754	0	0															10.6246					11.3404			10.9004
VTDB_HUMAN	P02774	Vitamin D-binding protein	144	143	0.537829	0.049303	0.00147997	-0.169628	0	-	22.148	22.137	21.7485	22.0326	21.9036	22.0636	22.3047	22.0911	22.2096	22.1873	22.0864	21.8974	21.8664	22.2393	22.1723	22.3895	21.97	21.9774	22.2684	22.0057	21.6398	22.48	22.3028	22.1279	22.4422	22.6795	22.0491	22.5844	22.2763	22.4367	22.2092	22.5643	22.3783	21.9824	22.5617	22.05	22.4186	22.288	22.2422
1433F_HUMAN	Q04917	14-3-3 protein eta	7	4	0.591513	-0.142587	0.412704	-0.169362	0	0	12.1479	12.7331	12.805	11.9626				11.9521	11.7737		12.0584	12.0566			11.0014					11.411		12.159	11.404	11.3307			11.0018	11.7508		11.8671			12.2938	12.7892			12.7049	12.3028
CBPB2_HUMAN	Q96IY4	Carboxypeptidase B2	29	29	0.902638	-0.0238439	0.0099703	-0.169306	0	-	12.8231	12.4632	12.512	12.5782	12.6917	12.4896	12.3255	12.3478	13.0978	12.4864	12.3608	12.484	12.78	12.9767	13.0191	12.8423	12.6569	13.031	12.4427	13.1945	13.0705	13.9998	13.0503	13.0216	12.728	12.752	12.7631	12.4427	12.6917	12.661	12.8905	13.1801	12.6706	13.2942	12.9899	11.8656	12.4203	13.235	12.8611
LYPD3_HUMAN	O95274	Ly6/PLAUR domain-containing protein 3	4	4	0.734481	0.105496	0.437686	-0.167808	0	0	10.7824	10.3847	11.3713	10.9424	10.5831	11.3056	10.2336		11.8635		10.9466	11.8523		9.87165	10.1715		9.95608					10.8776	10.77	10.8976	10.983	11.6138	10.3409	11.9009	9.90316	10.601	10.7552	11.1118	11.2618	10.4739	11.2637	10.6547	10.8277		10.4139
CSN2_HUMAN	P61201	COP9 signalosome complex subunit 2	2	2	0.0909169	-0.233313	0.193778	-0.165094	0	0					10.6557	11.0539						10.1679				11.018					10.2734	11.2949						10.6005	10.6625								10.9278	10.7979
LTBP1_HUMAN	Q14766	Latent-transforming growth factor beta-binding protein 1	5	5	0.0215641	-0.00847068	0.02624	-0.161559	--	-	12.3529	12.188	11.4659	11.5002	10.8084	11.8103	11.4702		11.9037	12.1782	12.4307		12.2664	12.246	12.3638	12.9378		12.1095	11.8638	12.0652	11.9333	11.9856	12.4512	12.0484	12.087	12.0078	12.4536	11.8849	11.7157	12.0845	12.0517	12.5403	11.922	12.2188	12.4117		11.6879	12.3352	11.8814
SYNE2_HUMAN	Q8WXH1	Nesprin-2	3	3	0.647863	-0.346903	0.837647	-0.160863	0	0		10.5375		11.2305		11.3384																										11.1544
JKIP2_HUMAN	Q96AA8	Janus kinase and microtubule-interacting protein 2	2	2	0.106781	-1.67435	0.656067	-0.157339	0	0											12.0113				11.5163											13.1937						12.7452					12.4614
PSME1_HUMAN	Q06323	Proteasome activator complex subunit 1	6	6	0.92682	0.0400337	0.290315	-0.157156	0	0	11.8656	11.4455	11.7362	10.5878	11.311	11.5792				11.7251	10.7602	12.9357	12.0923	11.3574	11.3596	11.6992	11.6307	11.159	11.4949			11.563	11.6038		11.3277	11.9528	11.9734	11.5069		11.9134	12.224	11.1203	11.6071	11.6058			11.6868	12.5614	11.5049
DPEP2_HUMAN	Q9H4A9	Dipeptidase 2	11	10	0.218902	-0.311915	0.627428	-0.156171	0	0	10.7913	10.3745	11.5082	10.1473	10.471	10.8858	9.73317		9.968	9.76476				9.84932	9.97835			9.95441	10.2802	10.149	9.71005	10.9829	10.9344	10.1653	11.3965	10.2735	10.3965	10.536		10.8223		11.5361	10.5642		10.9951		10.4447		10.4045
PON1_HUMAN	P27169	Serum paraoxonase/arylesterase 1	25	23	0.339789	0.197075	0.490109	-0.155136	0	0	16.8441	16.7774	17.1677	17.0939	15.743	15.8232	16.3163	17.9244	17.6105	14.5556	16.9166	17.7183	15.9331	17.0473	17.3165	16.7531	16.1838	16.7342	16.3744	17.0779	16.6715	16.3628	15.7611	16.5979	16.6413	17.3741	16.6641	16.7277	17.6449	16.6692	17.1547	16.8668	17.5287	17.1722	16.6525	17.0527	17.0505	17.2121	16.8451
MMP8_HUMAN	P22894	Neutrophil collagenase	2	2	0.229924	-0.425966	0.761863	-0.152889	0	0																11.3717																		10.7785
APOA4_HUMAN	P06727	Apolipoprotein A-IV	79	78	0.92086	-0.0468169	0.414859	-0.152691	0	0	16.0576	15.6055	14.2197	14.4499	15.5222	14.5155	15.9342	15.306	14.1436	12.6733	15.9046	15.0338	15.7296	15.7219	16.0488	13.9828	16.2495	15.8682	13.9411	15.6776	14.9209	15.5628	15.7936	14.8423	15.5892	15.6666	15.7041	15.5138	15.0342	14.4472	14.7135	15.7065	15.4615	15.011	15.5505	14.856	14.2412	14.9367	15.5469
ATS13_HUMAN	Q76LX8	A disintegrin and metalloproteinase with thrombospondin motifs 13	18	17	0.789052	-0.114376	0.678609	-0.151121	0	0	12.4379	12.0082		11.9085	14.2762		12.115	11.8461	12.1191	10.482	12.3106	12.1195		12.7384	12.5846	12.6818	11.6341	12.1002	14.1661	11.743	14.1492	10.8908	11.8931		16.0695	14.2576		12.012	12.1494	12.1248	12.1951	13.3408	12.8245	13.6003	11.5115	13.4022	11.679	12.6124	12.3348
HEM3_HUMAN	P08397	Porphobilinogen deaminase	2	2	0.394726	0.135793	0.354673	-0.149885	0	0		11.2539			11.2517	11.6232	10.6692	12.07		11.3815	11.5281	11.4757		11.9149		10.9229	11.5684	11.2811		11.5744	11.0501				11.6968	11.5844	10.9922		11.5578	11.209							11.5709
SPA6L_HUMAN	Q8N4H0	Spermatogenesis associated 6-like protein	2	2	0.621653	0.0973513	0.282838	-0.149061	0	0		10.3358				10.8397				10.6547				10.8744	11.0518			10.9738	11.1156	11.0329	11.3244		9.93203	10.5508	11.6153			10.787	10.1499				10.8273	10.5963		10.8344	9.96243
CECR1_HUMAN	Q9NZK5	Adenosine deaminase CECR1	4	4	0.817089	-0.0622152	0.296136	-0.14894	0	0														10.499		11.61								10.3833
STMN1_HUMAN	P16949	Stathmin	3	2	0.041502	-0.0223111	0.291561	-0.148639	--	0	10.1648	10.8271	10.0774	9.93844	10.4912		9.71761	11.6359	10.8813	9.68073	10.9229		9.8754	10.7883	10.7084	10.2008	10.8893		10.0037	10.9262	9.47427	12.0312	9.33736			10.8648	9.76595	10.3564	9.99088	10.5697		10.7933				11.3606		10.6779	10.8676
SEBP2_HUMAN	Q96T21	Selenocysteine insertion sequence-binding protein 2	2	2	0.906734	-0.0463974	0.378094	-0.147209	0	0	12.2649	11.7365	10.3672	10.8652	11.8122	12.0947	12.1271	11.7947	12.2591	11.8472	12.0712	11.3913	11.7176	10.5264	11.6726	12.7075	12.012	12.2843	12.3752	10.6618	11.9113	13.3249	12.5161	12.7903	11.3225	12.1511	11.6084	11.9599	12.2902	11.8617	12.0937	13.5354	11.6316	12.1879	12.6994	12.4062	12.3529	12.3266	12.1624
PRDX6_HUMAN	P30041	Peroxiredoxin-6	7	7	3.89e-05	-0.480335	0.298025	-0.146136	-	0	14.3351	13.8134	13.0506	13.4409	13.5787	13.9281	12.9485	12.8422	13.6471	13.9953	13.2328	13.3396	12.9507	13.3153	13.8783	13.521	13.1453	13.7898	13.5095	13.6084	12.687	13.0663	13.6545	12.9906	13.3899	14.1915	13.4078	12.9156	13.7406	13.7163	13.2126	15.1132	13.9802		12.7147	12.2608	13.7893	14.1167	13.6177
CKAP5_HUMAN	Q14008	Cytoskeleton-associated protein 5	2	2	0.866184	-0.147737	0.851631	-0.145404	0	0			18.3245	16.4669	18.6889	16.5133	15.9287			17.4468	18.8976			17.0451	18.1098		17.8679	19.2989	19.0301	18.8599	18.8204		15.1703	18.2994	18.9471	19.7811		19.1916	17.5253		18.661	16.5979	17.6969	18.4735		17.5805	17.8698	18.0162
UBP5_HUMAN	P45974	Ubiquitin carboxyl-terminal hydrolase 5	4	4	0.362541	-0.448381	0.882202	-0.145237	0	0	10.5447	10.9603	10.5109	10.7906	10.393	10.8079	11.0153	10.6412	10.7102	11.1281	10.9912	11.0571	11.3003			12.2715	10.9487	18.0184	18.0964		10.9728	11.441	11.3658	11.0718	11.5722	17.1946	11.8892		16.6416	12.4385	11.403	11.359	11.3518	11.1025	11.7578	11.2526	10.6891	11.3389	10.9884
SEPT6_HUMAN	Q14141	Septin-6	2	2	0.78458	-0.0402647	0.0520387	-0.144742	0	0	11.3069	10.7278	10.467	10.8292	10.6222	11.3412	10.6621	10.5964	10.1431	10.8785	10.73	11.5057	10.9703	10.7531	10.8484		10.6533	10.3133	10.8245	11.1397	10.6329	11.3496	11.1146	10.9074	10.7638	11.0604	11.1082	10.8543	10.5001	11.2997		11.5421	10.9113	10.2621		10.1972	10.6426		10.7467
ABCAD_HUMAN	Q86UQ4	ATP-binding cassette sub-family A member 13	2	2	0.0170456	0.354712	0.00129044	-0.1434	+	--	13.6133	14.6093	13.8238	13.4732	14.28	14.0346	12.8579	14.3922	14.2111	13.8885	13.2134	14.767	13.2417	14.2784	14.2194	14.688	14.7541	13.7125	14.1424	13.6979	13.6664	14.8926	12.8416	14.2333		14.4069	12.592	14.9108		14.5451	15.3845	14.4625	14.3247	14.9637	14.9606		14.2224	14.7518	14.5019
AP1M1_HUMAN	Q9BXS5	AP-1 complex subunit mu-1	3	1	0.760091	-0.142532	0.729382	-0.141972	0	0	13.3761				14.5429				15.0877						14.3479	14.6279							12.669				13.3127					14.4829	14.1384	14.0786	14.8007	14.8116		14.2899
PRDX1_HUMAN	Q06830	Peroxiredoxin-1	8	5	0.0180454	0.0443627	0.00176078	-0.141681	--	--	13.1562	13.3141	13.3015	13.4975	11.5743	15.2122	12.5081	14.1972	13.9384	12.7374	13.6922	13.5557	12.9241	12.9485	14.643	13.6197	15.1662	13.3548	12.8832	11.6366	12.2505	13.5228	13.097	13.8506	12.6822	14.199	13.2299	13.53	11.7398	14.6391	12.8506	12.3469	12.6622	12.1075	12.6108	12.9524	12.3143	12.427	12.5523
CUL1_HUMAN	Q13616	Cullin-1	2	2	0.0505224	-0.261082	0.426498	-0.139938	0	0	10.9227	10.8338	11.9625	12.4376	11.5514	12.1082	12.2358	11.865	11.7402	12.2366	13.7857	11.7923	12.324	11.9356		12.8696	12.0719		11.4326	11.8798		11.6682	11.283	12.2148	11.9677	12.2512	10.9042	11.9451	12.4002	11.8049	11.4879	12.0858	10.9768	10.4005	11.7017	12.6847	12.2679	12.0683	11.1939
HNRPQ_HUMAN	Q96LC1	Heterogeneous nuclear ribonucleoprotein Q	2	2	0.305805	0.252387	0.856897	-0.139717	0	0		11.1858								10.1574							10.718			11.1211				10.4971			10.5254			10.9503			10.9191				10.3722
ARPC2_HUMAN	O15144	Actin-related protein 2/3 complex subunit 2	12	12	0.997803	0.0161619	0.805416	-0.139709	0	0		10.2966	10.4948	10.5529	11.2565	10.3447		10.9879	10.1776		10.0769				11.4145	10.536	12.1387	12.005				11.218		10.9271	12.1066							11.5841		12.542
MUC18_HUMAN	P43121	Cell surface glycoprotein MUC18	9	9	0.995595	-0.00764791	0.237829	-0.138668	0	0	10.9293	10.9807	11.727	10.8433	10.4276	10.9425	11.9545	11.0346	11.3681	11.4721	12.0486	11.6632	12.0824	11.5543	11.0287	11.312	11.1635	10.3107	10.7477	11.4158	10.7343	11.2168	10.7705	11.6574	10.8405	12.0431	10.1259	11.7524	11.9528	10.8671	11.174	11.2615	10.7871	11.0606	11.5998	11.1824	11.2967	11.5663	10.6915
SRC8_HUMAN	Q14247	Src substrate cortactin	7	7	0.833664	0.0745273	0.485807	-0.137328	0	0	11.3112			11.3625		11.7168		10.5148			10.9861		11.1471		11.0761			12.9684		11.8077	12.3661	11.5729			11.0409		10.7171	10.8508			11.2211	11.273		11.0068		11.596
URP2_HUMAN	Q86UX7	Fermitin family homolog 3	24	24	0.723727	-0.0597608	0.193576	-0.135842	0	0	13.9401	14.3955	13.7573	14.065	13.4978	14.1442	13.7334	14.2033	14.1124	14.2529	14.625	14.4003	14.9151	14.1822	14.2613	13.5086	14.1448	13.7316	14.158	14.459	13.5842	14.029	13.5264	13.5139	14.2559	14.4479	13.3169	14.2029	13.6928	14.1713	13.8237	14.1785	13.798	14.3524	13.8616	14.1161	14.3493	14.2296	13.67
PERM_HUMAN	P05164	Myeloperoxidase	10	9	0.382135	-0.325549	0.831535	-0.134716	0	0	14.471		16.2436	13.6776	15.064	15.7877	14.3931		15.0977	16.6507	17.7762	15.1957	16.1203	13.2906	16.1715		16.6574	17.0367	16.3768	16.4971	16.4112		13.5985	16.4237	15.927	17.608		16.0434	16.496	14.7121	17.0706	16.2607	16.5596	16.0641		15.522	16.6306	16.608	10.8465
CAH2_HUMAN	P00918	Carbonic anhydrase 2	11	11	0.736408	0.0791681	0.408786	-0.134355	0	0	11.6837	12.6229	12.154	12.2592	12.0483	14.8197	11.1396	13.9207	13.1797	12.3932	12.0722	12.5767	11.1254	12.3304	12.981	12.9276	14.446	12.3881	12.3661	11.778	12.3274	12.9802	11.3602	12.2664	12.4039	13.7728	11.8903	12.3319	12.0806	13.7882	12.5576	12.2701	11.921	12.0198	12.8253	11.7271	11.7014	11.4523	12.1349
TXLNA_HUMAN	Q86YW3	Alpha-taxilin	2	2	0.122613	-0.278924	0.038745	-0.132557	0	--	12.072	11.4747	11.9811	11.8243	11.6798	12.4927	12.8794			11.6154	12.6456	12.3058	12.2933		11.1039	11.3638	12.6544	10.6159			10.9515	11.8783	12.0198	12.4853	11.5772		11.7109	11.8768	11.4311	12.4765		12.1987	11.4217	10.3374	12.3817	12.7763	10.6473		11.0482
FHR2_HUMAN	P36980	Complement factor H-related protein 2	21	12	0.231583	-0.139012	0.254029	-0.131284	0	0	17.5174	17.1204	16.4864	17.0561	16.1215	16.097	17.2058	16.158	17.04	17.0748	15.727	16.97	17.5977	16.98	16.5972	16.8196	16.7279	17.5733	17.0639	16.9121	16.5537	16.7392	16.6797	16.4605	15.9918	17.1291	16.4517	16.6354	17.1783	17.3059	17.2107	17.2423	17.5383	15.9278	17.6945	17.156	17.1812	17.0769	16.6721
CFAH_HUMAN	Q9NU86	Complement factor H	202	172	0.831167	-0.0243048	0.00809879	-0.131266	0	-	19.6095	19.1478	19.2811	19.1764	19.0891	19.1365	18.9225	19.0776	19.0615	19.0717	19.1893	19.2563	19.3938	19.3475	19.3379	19.5772	19.392	19.1159	19.1696	19.311	19.0504	19.4885	18.7433	18.7451	18.9805	19.2634	18.9343	18.94	18.7752	19.1213	19.2521	19.1721	19.0549	18.9729	19.04	19.0518	19.0762	19.0683	19.2181
NUCB1_HUMAN	Q02818	Nucleobindin-1	8	8	0.395856	0.101503	0.187305	-0.131209	0	0	15.4473	15.3684	15.5566	14.7548	15.2252	14.4809		14.8344	15.8092	15.0543	15.2882	15.4422	15.2884	13.9943	15.018	14.9186	15.3809	15.3095	15.1836	15.0115	15.5314		15.0769	14.8786	15.7217	15.5724	15.1121	15.0357	15.423	15.608	14.5492	15.0603	15.1364	15.2911	14.9002	15.0065	15.1627	15.118	15.4769
AGRL4_HUMAN	AGRL4_HUMAN	AGRL4_HUMAN	3	3	0.351773	-0.288814	1	-0.130952	0	0						10.973
IDHC_HUMAN	O75874	Isocitrate dehydrogenase [NADP] cytoplasmic	6	6	0.730257	0.115898	0.598218	-0.129775	0	0		10.6117	10.1077			10.3055		9.88724	10.454					10.3616	10.4078	10.8478	10.0619			10.3308		10.9616								10.224		10.4191	9.74112	10.6795		10.4955	10.1919		10.0088
COF1_HUMAN	P23528	Cofilin-1	16	13	0.819174	-0.0803291	0.592071	-0.128349	0	0	17.2082	17.5555	17.8351	17.7093	16.6644	17.3296	16.9346	17.8349	17.2884	17.4895	17.5061	17.5114	18.2229	16.569	17.0946	17.5102	16.7162	17.1219	17.3338	17.0854	16.7559	17.275	17.3335	16.4955	17.2331	17.8606	16.6397	16.7602	17.2886	17.3468	17.1494	17.5308	17.4819	17.5995	17.2139	16.9366	17.391	17.4602	17.4839
T132A_HUMAN	Q24JP5	Transmembrane protein 132A	5	5	0.963789	-0.0486537	0.786511	-0.128078	0	0	11.1325					11.2428			10.0353	11.0315	11.7803	10.705					10.4946	11.5485		9.75541	11.3178	9.88767	10.292	11.4624		11.2572			11.6876					10.6074	9.17105	10.7006	10.4498
DSC3_HUMAN	Q14574	Desmocollin-3	2	2	0.999655	-0.00563981	0.764691	-0.128002	0	0				13.0962			12.59		13.9648			13.3573			13.0376			13.932	14.1788										13.8274			14.2495
KMT2B_HUMAN	Q9UMN6	Histone-lysine N-methyltransferase 2B	2	1	0.355647	-0.195178	0.53411	-0.12799	0	0		10.6747							10.6402	10.3345				9.2166	11.0524			10.5716	10.7705		11.177			11.1196		11.3235			10.5615						11.3696	10.7791	11.0071		10.8899
SEPP1_HUMAN	P49908	Selenoprotein P	12	12	0.810613	0.029667	0.0293301	-0.126808	0	-	12.9331	13.0033	12.4063	12.4032	12.4163	12.2746	12.4238	12.9595	12.6922	12.4518	12.8066	12.6838	12.3066	12.6945	12.6942	12.5142	12.6151	13.1206	12.9587	12.7916	12.9528	12.9327	12.9198	12.7097	12.9039	13.0742	12.9369	12.7056	12.6091	12.5785	12.8507	12.5739	13.201	12.6786	12.8884	12.1459	12.7491	12.8868	12.6205
ALS_HUMAN	P35858	Insulin-like growth factor-binding protein complex acid labile subunit	32	31	0.318098	-0.106395	0.190349	-0.126553	0	0	16.8374	16.6036	16.1531	16.4812	16.1881	16.1988	16.5062	17.4293	16.3448	15.867	16.7222	17.0095	16.898	16.7829	16.7519	16.1625	16.1628	16.9692	16.0079	16.7923	16.9067	16.445	16.7605	16.659	16.8978	16.7498	16.6308	16.6212	15.985	16.7531	16.6268	16.5116	16.9048	17.0966	16.4073	16.6214	16.7094	16.7199	16.3308
PLCG2_HUMAN	P16885	1-phosphatidylinositol 4,5-bisphosphate phosphodiesterase gamma-2	2	2	0.930633	0.0537746	0.713797	-0.125797	0	0	10.6633						10.6398		10.2422	12.1193				10.7599	10.9862			11.8696	12.1237	11.4909	10.1431			9.77778	12.1698	10.9123		10.8665	10.9152	10.1617	11.263				10.4375		10.5398
DEST_HUMAN	P60981	Destrin	2	1	0.954485	0.0315911	0.477907	-0.125246	0	0	17.484	17.1688	16.7468	17.0323	17.1469	16.7195	16.9346	17.9613	17.771	17.3185	18.9067	17.1334	18.2229	16.2616	17.1042	17.5102	17.1802	17.2377	17.3338	16.9374	16.7658	17.1661	17.397	17.9246	17.2331	17.8606	16.9308	17.0674	17.8824	17.2458	17.4167	17.5308	17.8945	17.4092	17.2139	17.8134	17.836	17.6326	17.4839
PZP_HUMAN	P20742	Pregnancy zone protein	150	129	0.0140328	0.689068	0.843254	-0.124917	+	0	13.434	14.8277	10.3424	11.342	11.4046	12.6869	12.4671	13.6722	11.3401	14.2589	14.6732	13.2102	12.7095	13.3681	13.7709	12.147	13.3627	13.4488	15.7346	14.0982	13.2058	13.0114	14.5576	14.7862	12.434	13.9828	14.0876	14.0685	13.9199	14.4326	12.6435	12.0147	16.6364	13.5082	14.2365		14.4066	13.9194	11.6876
PRG4_HUMAN	Q92954	Proteoglycan 4	30	29	0.000905837	-0.323844	0.291692	-0.122759	-	0	13.5471	14.1139	13.9764	14.3845	13.1799	13.5704	13.7584	13.6564	13.4012	12.2471	13.6358	14.0394	13.9182	13.1101	14.0026	13.8725	13.3534	14.298	13.3926	13.872	13.779	13.5564	13.9578	12.6871	13.5086	13.6371	14.2344	13.5963	13.1289	13.5283	13.4006	13.7655	14.5861	13.7636	12.8496	14.0765	12.9073	14.0695	13.0902
EST1_HUMAN	Q9UDG8	Liver carboxylesterase 1	5	5	0.998919	-0.00489862	0.497932	-0.122609	0	0	10.7669	11.0256	10.9879	10.7703	11.2673	11.1501	10.0715	11.8559	11.8122	11.514	10.6426	11.2402	10.1418	10.7889	10.8648	12.3902	11.1041	10.2216	10.7368	11.0782	9.99621	11.844		11.5807	10.099	11.8531	11.1389	10.5256	11.4509	11.3175	10.9477	11.5199	10.7379	11.2453	11.8417	12.033	11.6779	11.0328	11.276
CD40L_HUMAN	P29965	CD40 ligand	2	2	0.615134	1.28203	0.993385	-0.121732	0	0									13.6138											10.4068									12.5355
CO6A2_HUMAN	Q6P0Q1	Collagen alpha-2(VI) chain	3	3	0.00439109	-0.252453	0.55393	-0.121358	--	0	13.684	12.1433		11.7868	12.6496	13.3456	12.3367		12.7558	13.1121	12.0791	12.788	12.1599		11.5896		12.3628	12.0871		11.8532	11.6174	12.5892	13.258	12.6937	12.2471	13.3252	12.2976	12.3504	12.3829	13.4537		13.0512		11.9371	12.8674	13.0961	12.1581		12.4963
CAND1_HUMAN	Q9H0G2	Cullin-associated NEDD8-dissociated protein 1	6	4	0.113897	0.228362	0.469759	-0.120992	0	0	11.0794	11.3968	11.588	11.2661	10.9184			10.9875	11.3399	11.5494	12.0153	11.9483		11.3096	11.0213	12.2698	11.1543		12.1024	11.0988	10.6281	10.9821	12.0966	11.4628	11.4546	11.3769	11.6835	12.0263	11.532	11.6574	11.3293	11.8273	13.2541	11.1346	11.2693	11.7883	11.6106	11.5926	11.2834
CATF_HUMAN	Q9UBX1	Cathepsin F	2	2	0.975019	0.0824152	0.918889	-0.120809	0	0	10.2942		10.2621	11.4088												11.4717		10.6932		10.9164		10.6933		10.5396			10.6463				11.207	11.1518				10.8848
NOE1_HUMAN	Q99784	Noelin	7	7	0.709441	-0.598874	0.9804	-0.120047	0	0	17.4071	16.4067	10.8626															10.3826		12.6574	11.1764		16.8618		12.1705		17.0785	11.4107	14.296
PCDH1_HUMAN	Q08174	Protocadherin-1	5	5	0.925301	0.0215213	0.0980632	-0.119825	0	0	10.2569	10.8534	10.329	10.5445	10.6279	10.852	10.3862	10.1993	10.5714	10.1602	10.7778	10.5594		10.562	10.6303	11.0331	10.6418	9.94049	10.3833		10.2007		10.5927	10.3483	11.4472	10.3577			10.8492	10.4847	10.4657	11.3527	10.5178	10.8259	11.3306	10.705	10.7207	11.2345	10.6728
PTPRS_HUMAN	Q13332	Receptor-type tyrosine-protein phosphatase S	5	4	0.499085	-0.156166	0.681886	-0.119223	0	0	12.8252	12.2965		12.2722	11.4336	12.3829	12.0348	11.0327	12.3118	11.7495	14.5562			12.355						12.8326		12.3301		13.8437	11.9821	12.4079		12.0914	12.9177			13.125	12.762	12.7995	11.5433		13.1246	12.0879	11.1133
HAUS3_HUMAN	Q68CZ6	HAUS augmin-like complex subunit 3	2	2	0.0103641	-0.0276613	0.737091	-0.119182	--	0	11.2596		10.0689	10.4482	10.8927		10.3241			10.611	10.6903	11.1213			9.68588		11.2196				9.9851	11.1069	11.5395	10.484	10.4889	10.4909	11.4102	11.0135		11.1938	10.3033	12.4233	10.6804		12.0624	10.7642			10.3384
SRGN_HUMAN	P10124	Serglycin	7	7	0.808616	-0.0947716	0.724955	-0.11834	0	0	11.3917	11.475	12.2053	11.4062	11.6613		12.5579	9.8664		11.039	10.5057				10.7459	10.6819			12.677	11.2355	10.5584	14.5099	11.373	10.7122	11.7517	12.513		11.3278					11.2483	10.8049		10.6844	11.1354	12.9315
SEM3B_HUMAN	Q13214	Semaphorin-3B	2	2	0.50597	-0.0754381	0.194867	-0.117611	0	0	16.8486	16.3507	16.1368	15.9607	15.8557	16.4345	15.4258	17.0197	16.8421	16.6833	16.3211	16.6094	16.2442	16.482	15.9686	16.7442	15.8899	16.7083	16.6734	17.4662	16.8801	16.4258	16.2395	16.2582	16.4661	17.0842	16.9293	16.1119	16.5686	16.4771	16.3684	16.576	16.9434	16.9617	16.4709	16.0983	16.841	16.1903	16.4832
PA1B3_HUMAN	Q15102	Platelet-activating factor acetylhydrolase IB subunit gamma	2	2	0.0677325	-0.21483	0.412955	-0.117118	0	0	17.7588	18.0684	17.1572	17.17	17.46	17.2374	17.054	16.2747	18.1308	17.7232	17.2161	17.1655	17.0964	17.3121	17.3238	17.4589	16.9303	17.8117	17.396		17.0041	17.1424	17.4547	16.7609	17.2862	17.8556	17.0256	16.9067	18.1857	17.4673	16.3075	18.7121	17.6669	17.2545	17.7024	18.0677	17.7757	17.4858	17.8337
GRB2_HUMAN	P62993	Growth factor receptor-bound protein 2	2	2	0.846132	0.138002	0.810508	-0.11667	0	0	14.1081	13.2906				13.3834							12.4837									14.0088	13.6775				13.1109									13.1889			13.1988
LRP1_HUMAN	Q07954	Prolow-density lipoprotein receptor-related protein 1	36	36	0.228022	-0.100074	0.128278	-0.116618	0	0	14.7518	15.2965	14.8131	14.7938	15.3014	15.1236	14.2956	14.7311	15.2039	14.7682	15.2181	14.9784	14.8534	14.9842	14.5306	15.3343	14.6925	14.8172	15.2003	15.2275	14.6911	15.2575	14.3548	14.9886	14.9695	15.1889	14.589	15.2133	15.1511	15.2194	15.0077	15.185	15.1685	14.7692	15.2008	14.7123	14.5232	15.1633	14.7185
ACTN1_HUMAN	P12814	Alpha-actinin-1	42	26	0.255482	-0.0884601	0.0935904	-0.116135	0	0	10.995	11.2197	11.3306	10.8458	11.1541	11.0889	10.8011	10.5546	10.7013	11.186	11.3817	11.4738	11.3756	11.0491	10.9605	11.8316	11.5944	10.9986	11.0455	11.3033	10.6914	10.8205	10.8458	10.892	11.7303	11.6575	10.7787	11.3463	11.1873	11.2131	11.3652	11.7864	11.1516	11.3129	11.6924	11.1418	10.695	11.3799	11.1269
ACTN4_HUMAN	O43707	Alpha-actinin-4	21	7	0.0900119	-0.158725	0.255227	-0.114597	0	0	10.767	11.3303	11.5506	10.9714	10.622	11.0486	10.7738	11.0124	10.7013	11.3523	12.3168	11.1081	12.023	11.0737	10.9252	11.9938	11.8324	10.8678	11.0455	11.374	10.6902	10.6174	10.7384	11.1085	11.7303	11.3374	10.4532	11.0723	11.3785	11.2131	11.3166	11.5446	11.1516	11.3592	11.391	11.4146	11.2323	11.3799	10.9348
CO7_HUMAN	P10643	Complement component C7	77	76	0.00540243	-0.364114	0.53861	-0.114158	-	0	16.3339	16.2982	16.4375	16.7765	16.3176	16.679	16.1459	16.4785	16.511	16.5718	17.0825	17.0277	16.7069	16.9449	16.7053	16.1864	16.4639	16.6389	15.8662	16.3994	16.8772	16.7117	16.2294	16.0066	16.1294	16.1864	16.9123	16.5942	16.4594	16.0851	16.793	16.7937	16.6649	16.5237	16.9842	16.2551	16.339	13.9917	16.3214
CO1A1_HUMAN	Q9UML6	Collagen alpha-1(I) chain	6	5	0.669856	0.0656368	0.296391	-0.114045	0	0	13.6125	12.5611	12.8049	12.4711	13.1823	13.4928	12.6702	13.6375	13.1497	13.491	13.209	14.0091	13.02	13.6882	13.5668	13.4417	14.1172	13.2311	13.8963	12.7023	13.4941	14.1004	13.175	13.3155	13.5518	13.2597	13.0378	13.2038	14.3776	13.6988	13.5934	14.1631	13.3645	14.0413	13.4608	13.2568	13.8602	13.289	12.8166
LMAN2_HUMAN	Q12907	Vesicular integral-membrane protein VIP36	4	4	0.0116822	1.26788	0.87084	-0.113802	+	0		11.5579													9.98545															10.687
HEM2_HUMAN	P13716	Delta-aminolevulinic acid dehydratase	7	7	0.0440652	-0.162397	0.196579	-0.111877	-	0	15.31	15.2776	15.9194	15.2046	15.5068	16.0773	15.0205	15.8744	15.8746	16.1503	16.4643	15.5372	16.3572	16.2146	15.4753	15.95	15.9491	15.7357	16.0787	15.3969	15.3669	15.4278	15.6316	15.8702	15.7115	16.0916	14.9904	15.3855	15.2405	15.9934	15.537	16.5611	16.0466	15.9782	15.6416	15.8874	15.9548	15.7665	15.725
APOB_HUMAN	Q13787	Apolipoprotein B-100	629	624	0.00146033	-0.33004	0.409745	-0.110669	-	0	17.0689	17.2048	16.4715	17.0291	16.9271	16.7698	16.4524	16.2282	17.1107	16.9287	16.0813	17.0309	16.4152	16.6461	17.1092	16.6853	16.5207	16.8586	16.6524	16.7741	16.0364	16.7618	17.0704	16.3881	16.7706	17.1523	16.9706	16.4408	16.678	16.8829	16.9089	18.1381	17.6641	16.3384	16.3434	15.7147	16.8946	17.3963	17.2483
B4GT1_HUMAN	Q14523	Beta-1,4-galactosyltransferase 1	2	2	0.0254356	-0.086971	0.849556	-0.110543	--	0	9.89729	13.7735				11.5141						12.9901		13.2718	13.2274	12.3902			12.7829		12.6636	14.0394	11.4474	13.2593		13.7548			11.2487	13.5713			13.2287	13.2446		10.2505			13.4313
TRML1_HUMAN	Q86YW5	Trem-like transcript 1 protein	3	3	0.990838	0.0170349	0.648592	-0.109998	0	0	10.4057		10.3642	10.6334		11.6507	10.1892	10.0842	11.5834	11.0478		10.9411		10.4189	10.3457	11.2245			10.556	10.5669	9.83794			11.2596					10.678				12.6005	10.7076	10.6944	11.279	10.4104		10.3142
IBP6_HUMAN	P24592	Insulin-like growth factor-binding protein 6	4	4	0.675518	-0.198397	0.844797	-0.109699	0	0																																	10.5847				10.5729
RSU1_HUMAN	Q15404	Ras suppressor protein 1	8	8	0.180805	-0.276878	0.729168	-0.109683	0	0		12.1356	11.9864	10.8966	12.4306	11.3812		11.873	12.5503	12.73	12.6432			11.0698	12.0119		11.0762	12.6074	12.2444	11.9178	11.8665	11.8666		11.4812	12.1474	13.1614			12.9419	11.83		13.6761	12.1806	11.5335	12.516		11.9842
FA5_HUMAN	P12259	Coagulation factor V	73	72	0.0572754	-0.173486	0.296172	-0.107976	0	0	10.9954	10.6474	9.89111	10.2608	10.3493	11.2219	10.3037	10.166	10.4771	10.0934	11.1358	10.5268		9.93765	10.1877	10.4561	10.1499	10.5374	10.2132	10.0495	10.5949	10.8369	10.2232	10.0951	10.9322	11.172	10.8126		10.9559	10.6112	11.1556	10.9405	10.1414	10.187		10.124	10.2624	11.3997	10.6724
CO6_HUMAN	P13671	Complement component C6	76	76	0.51035	-0.0997808	0.443764	-0.107532	0	0	15.1076	16.8503	14.3743	15.2435	14.4172	14.7157	14.3432	14.9061	15.0271	14.9105	14.4566	14.6719	15.8813	14.5608	14.8454	14.6863	14.5007	14.929	14.3328	14.9734	13.7979	14.5629	14.4154	14.8967	15.0608	15.2611	14.2459	13.5549	14.683	14.4027	14.7282	15.3341	14.9349	14.9931	14.7428	14.596	15.359	14.9997	14.5324
ATL2_HUMAN	Q86TH1	ADAMTS-like protein 2	9	9	0.522866	-0.112919	0.541551	-0.107189	0	0	14.6657	13.47	13.4532	13.7065	13.5634	13.6593	12.9433	14.2287	14.8485	14.2151	14.1379	14.76	14.6626	13.4709	10.0596	14.4368	13.3954	13.4727	13.3982	13.7145	13.2588	13.3643	13.8084	13.668	13.1274	14.547	13.427	13.7087	14.0312	13.5927	13.8941	13.6721	13.8178	13.2277	13.9846	14.1791	14.2024	14.2366	13.6477
4F2_HUMAN	P08195	4F2 cell-surface antigen heavy chain	3	3	0.984891	0.0111244	0.277305	-0.106891	0	0	18.8928	18.3781	18.5218		18.1616	18.336	18.3935										18.9275							18.5047				18.4779			18.3482								18.4355
FAAA_HUMAN	P16930	Fumarylacetoacetase	6	6	0.948836	-0.0368466	0.647471	-0.105516	0	0		11.3542	13.02	12.0668		11.4032		10.0007	11.5603	11.6403	11.6691			11.6726	11.7629		11.2037	12.8112		12.1081	11.8641	11.0773	11.6996	10.8599	13.6265	12.153	11.8132	11.8433	12.5359	11.718	10.9486	12.5323	11.6844	10.3846	12.1469	10.511	10.4595	11.9077	11.0653
APOA_HUMAN	P08519	Apolipoprotein(a)	63	49	0.623184	-0.0584505	0.218871	-0.104976	0	0	17.5096	17.2969	16.9929	16.8423	16.6308	19.2637	17.3879	17.3143	17.231	17.943	17.355	17.432	17.4301	17.1091	17.2334	17.3157	17.166	17.3052	17.2312	17.2411	17.2794	17.2937	17.1944	17.1182	17.4723	17.5055	16.9338	17.0987	18.1251	17.6167	17.5516	17.678	17.5719	17.5314	17.9316	16.6438	17.288	17.5838	19.7682
MARE2_HUMAN	Q15555	Microtubule-associated protein RP/EB family member 2	7	6	0.0134603	-0.0372271	0.558926	-0.102902	--	0	11.7238	12.4564	12.4262	13.1282	12.4571	12.4214	11.6221	12.6681	12.8378	12.5584	11.9392	12.8318	12.0936	13.1291	13.1111	12.4646			12.5901	12.4947	11.523	12.1083	12.8245	12.4998	12.9108	13.5327	12.8592		13.3448	12.409	12.3486	13.7002	12.7911	12.0964	12.3098	11.367	13.7351	12.8408	12.6788
FGL2_HUMAN	Q14314	Fibroleukin	4	4	0.957282	0.0665395	0.875662	-0.102689	0	0			10.5547												10.8336			11.3753	11.3271	11.0504							9.71028
KAIN_HUMAN	P29622	Kallistatin	41	41	0.490454	-0.083834	0.335208	-0.102425	0	0	16.1311	16.0434	15.3725	15.2244	14.7923	15.0123	15.6677	15.4111	15.6582	15.2619	14.8264	15.2823	15.4943	15.8628	15.3271	15.2825	15.9711	16.286	15.121	15.5441	16.0272	15.1923	15.6233	15.5089	15.323	15.6903	15.5803	15.0499	15.6704	15.5956	15.4197	16.5525	15.8973	15.6264	15.6677	15.4635	15.5391	15.0211	15.4372
6PGD_HUMAN	P52209	6-phosphogluconate dehydrogenase, decarboxylating	17	17	0.803827	-0.046416	0.355734	-0.101553	0	0	12.0828	12.5551	12.3723	12.078	11.9932	12.3283	11.7916	12.1213	12.4689	12.2606	12.5406	12.4042	12.1579	12.4802	12.4637	12.5316	12.0356	11.346	12.1654	12.2715	11.6208	13.6735	11.4866	11.9263	12.0947	12.5031	11.1833	11.994	12.678	12.4901	12.0579	12.7726	12.1348	11.4911	12.4053	12.5387	12.3586	12.4824	13.1222
TAGL2_HUMAN	P37802	Transgelin-2	15	15	0.833305	0.060038	0.600142	-0.101377	0	0	11.5283	12.3295	11.3681	10.3849	9.75144	11.3682	10.1851	10.4235	11.2976	10.0983	10.7749	11.7032		11.1563	10.2441		10.8379	10.5243	10.9948	11.5276	10.555	11.44	11.0672	10.7226		10.7302	10.5311	10.7387	10.7413	10.4293	10.6686	11.4255	11.0806	12.019	11.456	10.8239	10.995	11.83	9.87767
VIME_HUMAN	Q8N850	Vimentin	17	11	0.958652	0.0422068	0.774502	-0.100301	0	0	11.8813	11.9755	12.4408	12.4146	11.8155	12.3362	11.5925	10.3026	12.5789	12.0494	12.4211	11.5336	11.8752	11.8702	11.6653	12.1571	12.2432	12.0067	12.3914	11.6553	11.8001	12.2108	12.021	12.0264	12.0726	12.3123	12.1417	12.0921	12.47	12.386	11.7395	12.5855	12.1895	12.6495	12.5334	11.8785	12.0041	12.0675	12.1046
FAT1_HUMAN	Q14517	Protocadherin Fat 1	4	4	0.402889	0.0855666	0.27725	-0.10014	0	0	13.3215	13.4462	13.2943	13.4718	13.3737	13.6913	13.1357	13.3356	13.5365	13.242	13.6709	13.2589	13.0105	13.3747	13.4428	13.1591	13.6335	13.3365	13.59	13.1618	13.0474	13.9704	13.311	13.3918	13.5702	13.4228	13.0398	13.4474	13.6707	13.5364	13.4637	13.6684	13.5757	13.4548	13.3013	13.0587	13.6998	13.2891	13.2019
STA13_HUMAN	Q86XT1	StAR-related lipid transfer protein 13	2	2	0.983347	-0.013347	0.367695	-0.0998994	0	0	10.4992	10.7011	10.3454	10.8843		10.3017	10.1713	10.0782	10.7712	10.149	10.9015		11.5715		11.1024	11.1371	10.5713	10.889		11.4154	10.7356			10.6394			10.279			11.0921	11.1056	10.8591	11.1985	10.9785	10.881	10.9891	10.6753	10.7851	10.5802
APOA2_HUMAN	P02652	Apolipoprotein A-II	13	13	0.0958443	-0.475399	0.888284	-0.0992878	0	0	17.4995	16.3416	14.8934	15.8136	14.2573	15.6961	15.3157	14.4496	15.846	14.384	15.995	17.3382	15.4182	14.7261	15.3778	15.3449	14.732	18.8541	15.4715	15.2401	15.3226	16.2669	17.7648	15.8989	15.5029	18.0392	17.1372	14.8058	16.4889	15.4741	14.7566	19.1435	15.1403	14.6676	15.3755	15.8175	14.3778	15.908	16.3249
CO4A2_HUMAN	P08572	Collagen alpha-2(IV) chain	2	2	0.158804	-0.512228	0.130687	-0.0988294	0	0		11.0088							10.4684		10.648																					12.1268				10.5976
OMD_HUMAN	Q99983	Osteomodulin	3	3	0.993745	0.0393149	0.00852271	-0.0987927	0	--			11.5762			12.3312		11.852	11.2621		11.8569					11.6996											19.9192	11.8806			11.7562	12.8793				11.8207	11.3288	12.8764
HXK1_HUMAN	Q9NNZ5	Hexokinase-1	8	6	0.995639	-0.0175221	0.868895	-0.0985571	0	0				4.82269		10.4433	10.9352	10.2417	10.5427	10.1727				10.2465	10.4806		11.3611			10.914	10.1879	10.4812	10.2186	10.2763				10.009	9.78282		10.5149	10.8065	10.3863			10.0904
LAMB1_HUMAN	P07942	Laminin subunit beta-1	16	15	0.957952	0.0299114	0.61724	-0.0980478	0	0	12.0747	13.8148	11.9408	12.3809	12.8818	12.8767	13.1479	12.0296	12.2135	13.4154	12.5507	13.7697	13.2017	13.6697	12.4205	13.9347	13.1505	12.7748	13.13	13.4176	12.7905		13.9515	12.2534	13.3457	13.3435	12.767	14.6321	12.3326	13.1407	13.4877	12.876	12.8055	12.8414	13.0489	13.0516	12.2516	14.3363	12.9091
EP3A_HUMAN	Q14507	Epididymal secretory protein E3-alpha	2	1	0.840944	0.066278	0.656908	-0.0978663	0	0	12.8771	11.3377	12.9176	11.9095	11.2934	11.5307	13.2037	11.6799	12.9496	10.6685	12.558	12.3612	13.0449	11.9538	12.461		11.2297	11.1435	12.878	13.0528	12.2563	11.7288	13.0553	12.4965	11.5586	12.1308	12.6293	12.4577	12.7448	12.2581	12.2797		12.7767	13.2231	12.4479	12.5369	12.7325	12.5659	13.1058
ICAL_HUMAN	P20810	Calpastatin	3	3	0.877276	0.0285162	0.230661	-0.0975666	0	0	18.1463	18.1695	17.995	17.2681	17.923	18.3539	18.2779	17.9458			18.0269			17.74	17.6991	17.7026	18.1984	18.2647	18.3064			18.4817	18.1751	17.8678			18.1455	17.7866	17.8044	18.3978	18.1019	18.241	18.3714	18.2908	18.5416	17.8362		18.0774	18.0967
MEGF8_HUMAN	Q7Z7M0	Multiple epidermal growth factor-like domains protein 8	15	14	0.700921	-0.0809534	0.609957	-0.0969492	0	0	12.135	11.6696		11.9851		12.0416	10.7493	11.6753	12.7391		12.2521			11.0691	11.7699	11.7363	12.1997			11.8822	11.7281	11.8948	12.2195	11.4038		12.2531	10.9062		12.2923	11.8786		11.8898	11.9825	12.2622	12.2731	12.0939	12.3659
F13B_HUMAN	P05160	Coagulation factor XIII B chain	49	48	0.527202	0.0616799	0.20564	-0.0968427	0	0	12.5129	12.1265	11.5952	11.9453	11.5785	11.5701	12.0033	11.9948	12.1141	11.6849	12.091	11.9502	12.0802	12.4506	12.4384	12.1175	11.7201	12.3132	11.4656	11.8936	12.1487	12.4449	11.9821	12.0545	11.8519	11.8313	12.3338	11.9609	12.1612	12.1997	11.9299	11.8148	12.5404	11.9222	12.5482	12.1121	11.9674	12.0566	11.9099
DPP3_HUMAN	Q9NY33	Dipeptidyl peptidase 3	6	6	0.971527	-0.0112898	0.135755	-0.0961449	0	0	15.0631	14.1515	14.3894	14.7754	14.787	14.58	14.6845	14.1923	13.9301	13.9826	13.9529	14.0671	14.0354	14.2262	14.1445	14.3754	14.5937	14.0166	14.1604	15.0617	14.1024	14.7715	14.4539	14.1244	14.2124	14.232	14.1767	13.8732	14.7085	14.3668	14.2703	14.5897	14.5497	13.7233	15.0246	14.4723	14.2419	14.3153	14.1811
SCTM1_HUMAN	Q8WVN6	Secreted and transmembrane protein 1	2	2	0.893333	0.0577379	0.65559	-0.0960364	0	0	10.755			10.2015		10.7711		10.316	11.3074	11.1792		11.5411																								10.9885	10.9318
DOK3_HUMAN	Q7L591	Docking protein 3	2	2	0.575894	-0.192049	0.929221	-0.0954006	0	0																																				9.7776
RET4_HUMAN	P02753	Retinol-binding protein 4	27	26	0.879034	0.0294542	0.264948	-0.0952572	0	0	15.0833	14.4745	14.778	14.1328	14.8081	14.4176	14.8376	15.0368	14.5934	14.3861	14.2716	14.4784	15.2314	14.476	14.7053	15.1056	15.0729	14.893	14.306	15.0037	14.8032	14.1664	15.1066	14.9313	13.9661	14.7131	14.5925	14.8841	15.2082	13.9952	14.6944	15.232	15.2321	15.2385	14.372	13.7867	14.412	14.8569	14.9847
CRIS3_HUMAN	P54108	Cysteine-rich secretory protein 3	9	8	0.794304	-0.0442452	0.34619	-0.0948189	0	0	10.9861	10.895	10.6738	10.399	10.5875	11.5042	10.5953	10.4611	10.6807	10.7296	11.0539	10.8049	10.7965	11.6196	10.6209	11.1699	10.8371	10.0978	10.8595	10.9664	10.917	10.8173	10.6479	10.6057	11.1924	10.5308	10.7187	11.056	11.1891	10.4446	11.115	11.1871	11.0708	10.4877	11.7431	10.8946	11.3752	10.7992	10.9028
STIP1_HUMAN	P31948	Stress-induced-phosphoprotein 1	8	8	0.815524	-0.0750965	0.679707	-0.0937312	0	0	12.0693	11.4677			12.6167			11.8527		11.7058					11.5162		11.3032	11.5192	11.7247	10.6858			11.6335				11.4244			11.5605			11.8104	11.2028	12.3128	11.9784		11.6701
PAEP_HUMAN	P09466	Glycodelin	5	5	0.925141	0.0406545	0.66788	-0.0934651	0	0	11.6942	11.2128		11.1416	10.6743	11.9686	10.5878	11.8603	12.1682	11.0609	10.7149			11.8747	11.4099		12.0644	11.3134	11.6171	11.3604	11.7662	12.0512		11.8356	12.2524	12.9212	10.492	10.7911	12.5006	12.2985	11.4946		11.3419	12.0681		10.8215	12.1285	11.5223	11.2273
XPP2_HUMAN	O43895	Xaa-Pro aminopeptidase 2	5	5	0.3001	0.219478	0.832708	-0.0934107	0	0			16.3038	16.5427	16.8623	17.0753	16.5185		17.3942					17.4643	17.2435					17.1653									17.0344				16.8729			17.7437	17.1814
TGBR3_HUMAN	Q03167	Transforming growth factor beta receptor type 3	2	2	0.840412	-0.0670524	0.632328	-0.0931601	0	0				10.2996		10.5619		10.4064	10.3086	10.1518	10.9656			10.3052	10.1461					10.4126	10.3088	10.1898					10.2303					10.2513	10.6334			10.3436
PSA7_HUMAN	O14818	Proteasome subunit alpha type-7	4	3	0.569434	-0.192186	0.873472	-0.0930611	0	0			11.0181	10.1836	10.7096	10.8881		9.9227		11.0755					10.7031					11.8586		11.0669		11.0918		11.7387	11.3604	11.1906	11.1994			11.0435	10.8175	9.99788		10.4312	10.1552
GRD2I_HUMAN	A4D2P6	Delphilin	2	1	0.669753	-0.119796	0.744829	-0.0925945	0	0	11.3457	13.0139				13.6677	13.2423	14.4841	14.0432	12.328		13.9361	13.3934			13.7579	13.3003	13.0301	13.283		13.065	12.7048	13.4657	13.8526	12.1413	14.6387	13.2984			13.7871	13.5396	13.2576	13.6733	14.0967	13.9917	13.2092		14.1665	12.9661
SRCRL_HUMAN	A1L4H1	Soluble scavenger receptor cysteine-rich domain-containing protein SSC5D	4	4	0.478425	0.259862	0.903668	-0.0912364	0	0			13.949																		12.032		12.6306	14.1262	12.8698		12.3357											13.0487
PSA6_HUMAN	P60900	Proteasome subunit alpha type-6	5	5	0.757533	0.0610855	0.532522	-0.0900063	0	0	13.4633	13.2173	12.8018	12.476	13.0494	12.7735	11.9607	12.1728	12.8683	12.5347	12.7494	13.117	12.7967	10.8572	12.7239	13.3735	13.3929	12.6084	12.6521	12.5985	12.9603	12.9584	12.9429	12.9225	12.7957	13.3656	12.8896	12.9294	12.9063	13.5472	12.3873	13.0012	12.988	13.0033	12.7859	13.0618	12.4844	12.6189	12.9201
APOM_HUMAN	O95445	Apolipoprotein M	10	10	0.0189717	-0.285294	0.624936	-0.0895541	-	0	13.0275	12.3932	11.101	11.7003	11.5195	11.776	11.2389	11.6066	12.0025	11.9362	11.2525	11.7092	10.6711	11.7512	12.3801	11.7544	11.1098	11.6363	11.9956	12.0991	11.5706	11.988	12.451	11.7895	11.9255	12.0404	11.9525	10.5942	11.8039	12.2577	11.3571	14.0838	12.0477	11.7384	11.7084	10.8182	10.9913	11.6133	12.0352
K2C1B_HUMAN	Q7Z794	Keratin, type II cytoskeletal 1b	4	1	0.877756	-0.0595681	0.726985	-0.0894826	0	0		10.6417	10.9447	13.7684	10.8442	11.1925		10.6839	11.2159	13.109	12.2092			11.4305	11.1263	10.3796	10.7484	9.23194	10.7834	10.1728	10.5268			10.5702	11.9736	11.3095	10.9042	10.694	10.8446	10.8867	10.4694		11.0907	11.1962			10.5863	10.816
MA1A1_HUMAN	P33908	Mannosyl-oligosaccharide 1,2-alpha-mannosidase IA	17	17	0.81411	-0.122104	0.887754	-0.0885761	0	0	11.9804		11.4584	11.6345	11.519	12.725	11.4525	11.8584	11.9305	11.957	11.9874				11.4993	12.0588				11.0408	11.3793		11.5976	11.3517		12.0254		11.6475	11.2405	11.8184	15.5275		11.6585	11.853	11.6482			11.6776	11.6387
CATC_HUMAN	Q7Z3G7	Dipeptidyl peptidase 1	3	3	0.0319697	-0.113359	0.773827	-0.0876966	--	0	11.4458	11.2382	11.5031	11.5675	11.7517	11.7528	11.8536	10.3003	10.2946	10.8627	11.5158	11.6575	11.6107		10.1132	11.1901	11.6832				10.459	11.6691	11.7518	11.3682	10.6897	10.7646	11.3781	12.0724	10.608	11.876	10.4325	11.8033	10.6588	10.1053	12.1474	11.1427	10.2584		10.6242
NMI_HUMAN	Q13287	N-myc-interactor	2	2	0.85867	-0.258718	0.982388	-0.0867419	0	0		10.7026								10.4481
BLVRB_HUMAN	P30043	Flavin reductase (NADPH)	11	11	0.211005	-0.206104	0.738253	-0.0854235	0	0	12.9375	13.0221	12.2281	12.8608	13.3537	15.301	11.9553	13.8792	13.2301	12.6833	13.1875	12.7824	12.8693	12.3982	13.6175	13.057	14.4247	12.3352	12.2606		11.9458	12.7943		12.6042		13.97	12.3939	12.8036	12.772	14.2045			12.4692	12.1773	13.0362	12.65	12.7021	12.9311	14.4643
TERA_HUMAN	P55072	Transitional endoplasmic reticulum ATPase	8	8	0.768532	-0.080693	0.697857	-0.0840082	0	0	10.9805	10.4062	9.71009		10.434	11.0453	10.8853	10.124		9.64131	11.1378	13.5702			11.1053		10.8964	10.3764		11.1187	10.2187	10.6307	10.9801	10.2742		10.5514	10.7377	10.4054	10.5785			10.6017	10.5562	9.98937	10.8272	10.1098		10.7768	10.358
MSD2_HUMAN	Q6P1R3	Myb/SANT-like DNA-binding domain-containing protein 2	2	2	0.97049	0.130559	0.987915	-0.0831256	0	0	13.0669			17.1694		17.1129					13.143	17.1087															16.0957												15.6212
ADA12_HUMAN	O43184	Disintegrin and metalloproteinase domain-containing protein 12	32	32	0.886997	0.0461846	0.674122	-0.0824403	0	0	13.3119	13.4039	12.8059	13.3013	12.1449	12.372	12.034	13.1328	12.5333	12.0041	13.5564	13.1464	12.9192	12.8027	13.5737	12.5014	12.3776	13.5135	11.3246	13.729	12.8292	14.3893	12.399	13.1715	13.4348	13.0526	14.0315	12.7629	12.0776	12.8126	12.7495	13.7567	12.859	12.8141	14.1221	11.8121	12.3214	12.567	13.4608
CD109_HUMAN	Q6MZI7	CD109 antigen	13	13	0.958367	-0.0269124	0.663012	-0.0817841	0	0	12.2284	11.9123	10.8251	11.8048	11.0071	11.9752	10.3298	12.8381	14.6202	11.4595	11.3723	11.6411	11.1969	12.4939	11.5115	10.8849	11.9351	11.8203	12.0672	11.3993	11.3815	11.8983	12.9363	11.8417	11.7545	12.6148	12.0452	11.3629	12.6682	11.8819	12.2324	11.9297	11.7697	12.9528	11.5541	11.7783	12.8019	11.3552	11.3083
VCAM1_HUMAN	P19320	Vascular cell adhesion protein 1	17	17	0.000102715	-0.0978875	0.475089	-0.0813647	--	0	11.7261	11.6405		10.5835	10.7845	11.4711	10.85	10.4217	10.918	10.7947		11.5995	10.828	10.3149	11.1408		10.7736	10.5888	10.5526	10.9181	10.317	10.6632	11.603	10.6979		11.1728	10.9026	10.9061	10.7874	11.5473	11.3266	12.3341	11.2698	10.6171	11.4515	11.3484	10.9665	10.8956	11.2537
CR2_HUMAN	P20023	Complement receptor type 2	8	8	0.551234	0.106339	0.708702	-0.0809648	0	0	16.0256	16.8188	15.5299	15.73	15.8166	16.2733	15.1338	16.3014	16.9252	16.3525	16.8383	16.7191	15.7279	15.8887	15.9504	16.2274	17.574	16.1656	16.7929	15.7328	16.1665	16.8169		16.6519	16.5959	17.3024	14.5349	16.2534	16.9984	16.8953	16.931	16.7762	16.6559	16.23	16.5621	16.8319	16.9561	16.7597	16.7234
HPPD_HUMAN	P32754	4-hydroxyphenylpyruvate dioxygenase	5	5	0.64043	0.156043	0.874553	-0.0800004	0	0	15.029				14.6319	13.7426	13.8028	9.34441	14.5039	15.0894	13.4716	14.5511		16.6324	14.5018	14.4116	14.5239	14.2444	14.3525			14.3241	13.2573	14.1383	13.9294	13.7729	14.073	13.894	14.0176	14.0944				14.4876		14.243	14.2668		14.0853
PLXD1_HUMAN	Q9Y4D7	Plexin-D1	3	3	0.0847025	-0.306639	0.777232	-0.0799539	0	0	10.7188					10.8373	9.89975					11.2097										10.9968	10.7359	10.5839	10.6727					11.0884		11.3951	10.8228		10.6865	10.7657	10.4787
SPRC_HUMAN	P09486	SPARC	7	7	0.997123	0.0274641	0.971888	-0.0788964	0	0		9.78739										11.8524																	9.99088								9.5877
LZTS1_HUMAN	Q9Y250	Leucine zipper putative tumor suppressor 1	2	2	0.753955	-0.260102	0.967345	-0.0783842	0	0			11.5819											11.9974										12.1705	12.032		10.8373	13.7206	12.4991	12.1212
UBC12_HUMAN	P61081	NEDD8-conjugating enzyme Ubc12	2	2	0.843479	0.0435432	0.571045	-0.0780099	0	0	13.4124	12.8573	13.6056	13.042	13.1476	13.4566	13.0114	13.7191	14.0497	13.499	13.4124	13.5578	14.0566	14.2334	13.2365	13.665	13.5132	13.7167	13.7833	13.6582	13.749	14.2821	12.8179	14.0388	13.5637	14.0538	12.1999	13.5078	13.6802	13.1477	14.0657	13.9178	14.0783	14.4196	13.5023	13.7145	14.1252	13.6904	13.0855
ANTR1_HUMAN	Q9H6X2	Anthrax toxin receptor 1	3	3	0.755893	-0.0387125	0.315376	-0.0779444	0	0	13.0377	12.4951	12.5132	12.3508	12.2849	12.9662	12.3085	12.6783	12.7129	12.7594	12.7085	12.8049	13.0453	13.1403	12.7642	12.8396	13.0549	12.5886	12.7311	12.5814	12.3474	12.7465	12.6354	12.6661	12.6388	12.8633	12.3384	12.7156	12.761	12.9073	12.8245	12.9441	12.7795	13.1753	12.9529	12.8907	12.7853	13.1106	12.3041
IL6RB_HUMAN	P40189	Interleukin-6 receptor subunit beta	5	5	0.990186	-0.0158216	0.759181	-0.077154	0	0	13.0068	11.7544		11.3148	11.8847	12.138			12.0028		12.0352	11.6059					11.7914				11.9951	12.2071	11.6609	11.8964		12.5758	12.2504		11.6012	12.4114	11.5088	11.9317	11.8967			12.313	12.387		11.9768
BLMH_HUMAN	Q13867	Bleomycin hydrolase	7	7	0.418964	0.0903579	0.517481	-0.076969	0	0	11.283	11.4868	11.3181	12.2528	11.1339	10.7971	11.6414	11.6145	11.8855	11.6124	11.5665	11.1712	11.4633	12.0356	11.1886	11.823	11.3009	11.4663	11.4885	11.0299	11.5574	11.6142	11.5029	11.7818	11.1745	11.6035	10.6535	11.3369	11.8092	11.4039	10.8721	11.5612	11.4591	10.9895	11.5668	11.8789	11.7073	11.0971	11.1857
PCD18_HUMAN	Q9HCL0	Protocadherin-18	3	3	0.824087	-0.0416448	0.512487	-0.0765504	0	0	13.8036	13.0397	13.701	13.6953	12.9775	13.5805	13.7293	13.3262	13.391	13.9247	13.0513	13.3805	13.1969	13.5556	13.4454	13.6234	13.5301	12.6725	13.804	13.897	13.4257	14.1703	12.7816	13.4368	13.2124	13.0645	12.3951	13.4186	13.3473	13.3115	13.2671	13.2008	12.736	13.6695	13.1398	13.6729	13.6364	13.6105	13.4105
SNX6_HUMAN	Q9UNH7	Sorting nexin-6	2	2	0.00901031	0.713663	0.942185	-0.0765131	+	0	11.4422	13.0119						11.9628		12.2141	12.3029			11.4434	11.4311				14.1034	12.2015	11.1349		13.2361	13.1875		12.3388	12.2193	11.032	11.5834	12.425			14.9352	11.5455	12.1322		12.5977
EZRI_HUMAN	P15311	Ezrin	14	4	0.916859	-0.0428887	0.747983	-0.0764093	0	0	13.1712	12.6433	12.6593	12.8848	11.4557	12.9862	11.9008	13.606	13.0439	13.2411	12.8803	12.7632	12.0976	12.6938	12.3804	12.5348	11.849	13.5751	13.054	12.6735	14.2196	13.1261	12.2574	12.9809	14.3065	13.3928	13.6712	13.0368	12.7282	12.854	13.5744	12.9312	13.3084	12.697	13.1749	12.9176	13.0583	13.3628	12.4713
KCRB_HUMAN	P12277	Creatine kinase B-type	3	1	0.996851	0.0127811	0.857029	-0.0763054	0	0	9.55329		11.0638		10.0983	10.589			10.312					9.9741					10.5208		10.299	11.0494			10.5113				10.6832	10.6072		10.8257
COL10_HUMAN	Q9Y6Z7	Collectin-10	6	6	0.992106	-0.0186136	0.876671	-0.0761641	0	0		12.4742	12.2547	12.7096	11.9718		10.5545	11.8982	13.1746		13.4194	13.2692	11.8707	13.3662	11.6572	13.3171	11.8213		12.0185	11.1888		11.554		12.7903	13.1761			12.6476		11.8114		13.538	13.7174	11.4725	11.7819				13.1713
ATRN_HUMAN	Q9NTQ3	Attractin	62	60	0.666561	-0.0432869	0.291375	-0.0752948	0	0	16.3524	16.0336	15.973	16.176	15.4783	15.5937	16.2555	16.2978	16.1059	15.7485	16.6599	16.1795	16.0503	15.8993	16.0601	15.9639	16.1566	15.924	16.1866	15.9005	15.8705	16.1353	16.2093	15.9697	16.3872	16.3903	15.893	16.0796	16.4993	15.9586	15.7629	16.5455	16.2366	15.9387	16.2215	15.9114	16.3656	15.9526	15.9037
ANXA4_HUMAN	P09525	Annexin A4	10	9	0.0209666	-0.191019	0.506633	-0.0746096	-	0	12.4607	12.443	11.2746	12.0785	12.1718	12.5631	11.4134	11.603	12.2292	12.1546	11.5346	12.299		12.3904	12.2304	12.1904	12.0583	11.9435	11.9887	12.2221	11.5364	12.2302	12.1663	12.1124	12.1182	12.3901	12.2956	11.6622	12.1696	12.2939	12.1144	13.4238	12.8881	12.1613	12.1631	11.4124	12.2963	12.7707	12.3257
FCN2_HUMAN	Q15485	Ficolin-2	3	3	1	-0.000185604	0.970628	-0.0737709	0	0																																	11.76
KIT_HUMAN	P10721	Mast/stem cell growth factor receptor Kit	2	2	0.0180454	-0.00751461	0.554404	-0.0735427	--	0	13.4068	12.7803	13.5113	12.8009	13.0485	12.8699	13.0949	12.3914	12.8479	13.5543	12.9924	12.8457	12.6154	13.0117	14.2621	13.2711	13.4998	12.7062	12.9923	14.5882	12.4599	13.8921	13.1308	12.8722	12.6016	12.4485	13.1807	12.5955	12.5886	13.0358	12.7293	13.081	12.8066	12.8043	13.3228	13.1305	12.5764	12.6953	12.7698
PSA5_HUMAN	P28066	Proteasome subunit alpha type-5	2	2	0.345884	-0.210298	0.878558	-0.0708885	0	0	13.1662	13.5562	12.58	13.1503	11.7921	14.0351	13.7867		12.2346	11.9301	14.2875	13.0136	13.6363		11.9251	11.7516	12.5839	12.9256			12.2996	12.5127	13.2868	13.4194	12.15	13.0682	12.8843	13.7532	13.2096	14.1181		13.3661	12.5309		13.4194	13.7277	12.4966	12.4134	12.919
SYTC_HUMAN	P26639	Threonine--tRNA ligase, cytoplasmic	2	2	0.4006	-0.854497	0.990342	-0.0700325	0	0					11.3498																11.563				12.2636
PUR9_HUMAN	P31939	Bifunctional purine biosynthesis protein PURH	3	3	0.00327958	-0.31223	0.703195	-0.0662122	-	0	10.914	11.4768	11.0929	11.3253	10.662	11.1918	10.7565	10.7184	10.4632	10.2382	10.571				10.9062		11.0379		11.0031	11.3747	11.111	10.7965				11.2544	11.2606	10.7343		10.938		11.1142	11.8819	10.7208		11.1949	9.92408
IDS_HUMAN	P22304	Iduronate 2-sulfatase	2	2	0.500507	0.872966	0.852564	-0.0661586	0	0				9.22021																				9.24881
C4BPB_HUMAN	P20851	C4b-binding protein beta chain	9	9	0.679022	0.0699443	0.68152	-0.0656239	0	0	12.7315	12.8727	12.6778	12.1395	12.1183	12.9298	12.3103	12.8788	13.1294	12.6886	13.4219	13.0371	13.1287		12.7674	13.4547	11.4957	12.5653	12.4472	12.2914	12.2054	12.7292	12.7946	12.5257		12.821	12.7039	12.2674	12.9144	13.0413	11.9627	11.8978	12.6082	12.2987	13.6259	13.3241	12.9001	12.9918	12.6863
SBP1_HUMAN	Q13228	Selenium-binding protein 1	10	10	0.127661	-0.255889	0.861869	-0.0651831	0	0	14.2538	13.4079	12.6424	14.0727	13.5053	14.1076	14.7682		12.4429	13.75	13.7154	14.0253	13.9464		13.9859		14.005	13.269	12.7838	13.804	13.0355	13.2916	13.396	13.7932	13.2456	12.6528		13.1109	12.8712	12.6223		14.2248	13.4879	13.6572	14.0349	13.8853	12.7166	14.482
K2C1_HUMAN	P04264	Keratin, type II cytoskeletal 1	26	1	0.999998	-0.000130333	0.645757	-0.0651698	0	0	18.1861	17.8229	18.0188	17.8167	17.9638	18.312	17.3917	17.9796	17.8057	17.9509	18.6277	17.8981	17.509	17.6575	17.8403	17.9362	17.6655	17.8839	18.016	17.4696	17.5582	17.9555	17.7741	17.7368	18.5903	18.2893	17.8861	17.7291	18.0491	18.0238	17.7261	18.7017	18.1571	18.1393	17.1821	17.9989	18.1952	17.9145	17.7883
FETUA_HUMAN	P02765	Alpha-2-HS-glycoprotein	53	53	0.934047	-0.0171558	0.375972	-0.0650424	0	0	20.7984	20.4136	20.4595	20.4473	20.3127	20.6372	20.338	20.6419	20.3867	19.8245	20.6596	20.9471	20.6123	20.5694	20.2554	20.6164	20.7519	20.2966	20.2898	19.9467	20.1657	20.579	20.3617	20.632	20.6789	20.7585	20.405	20.4769	20.7871	20.885	20.5951	21.0638	20.3781	20.685	20.5649	19.9377	20.4415	20.7141	20.4157
NENF_HUMAN	Q9UMX5	Neudesin	2	2	0.997987	0.00529288	0.726775	-0.064652	0	0		11.3629	12.2264	12.1568	11.571	12.1238	11.4224	11.5207	11.5473	11.681	12.6687		12.1119	11.9917	11.0371	12.6822	12.1335		11.5866	11.6829	11.1536	11.4846		12.1892	12.0153			12.0702	12.1462	11.9834	11.8654	11.872	11.6222	11.4226	11.7635	12.3068	12.3426	11.5967	10.9128
SYSC_HUMAN	P49591	Serine--tRNA ligase, cytoplasmic	2	2	0.274419	-0.40198	0.969369	-0.0644124	0	0						12.3701		12.2889		13.325				13.2372				11.513				12.7216							11.64
PTPRG_HUMAN	P23470	Receptor-type tyrosine-protein phosphatase gamma	6	6	0.994684	0.0284769	0.968109	-0.0643897	0	0					10.2467					9.07213				9.92479	9.88003										11.0522				9.29337	9.82875					10.7183
NAMPT_HUMAN	P43490	Nicotinamide phosphoribosyltransferase	6	6	0.947517	-0.0176186	0.486542	-0.0640944	0	0	13.1644	12.4927	11.8635	12.7353	12.4574	12.3709	11.5604	12.9994	12.8657	12.4191	12.3724	12.3916	12.7034	12.3081	12.5307	12.7932	12.2468	12.319	12.7544	12.6273	12.3353	12.7448	12.3869	12.7442	12.3882	12.9956	12.4621	12.5587	12.7088	12.8246	12.332	12.8239	12.7829	12.4416	12.5872	12.5717	12.6062	12.5266	12.553
ARHG6_HUMAN	Q15052	Rho guanine nucleotide exchange factor 6	3	3	0.997217	-0.00917776	0.868439	-0.0640186	0	0	19.5958	18.8022	20.3329	19.6747	19.9281	20.0281	20.032	18.6998	20.3735	20.1604	21.15	21.0149	19.4512	19.7286	20.3896	19.0121	19.4985	20.7616	20.5848	20.0987	21.3569	19.0609	20.4961	20.4596	20.4894	20.9781	18.5883	20.1334	20.8424	20.1249	20.547	21.0874	20.8164	20.8837	20.6874	20.6579	21.2895	20.717	19.7505
NCHL1_HUMAN	NCHL1_HUMAN	NCHL1_HUMAN	19	19	0.983489	0.0150184	0.723615	-0.0640128	0	0	11.9606	12.3745	11.8641	12.2666	12.3534	12.0282		11.7237	11.9549	11.6741	12.6029	11.9875	10.9551	12.2153	12.2061		11.9846	12.033	13.1271	12.1182	10.5425	12.2754	11.9752	12.3626	12.0471	11.9773	11.7286	12.0459	12.3128	12.1053	11.4199	12.6875	13.3569	11.985	12.3421		12.7401	11.7319	12.547
1433E_HUMAN	Q7M4R4	14-3-3 protein epsilon	12	10	0.999995	0.000227618	0.652559	-0.0638976	0	0	13.2716	13.8994	13.8244	12.8487	13.4459	13.2568	11.654	13.0759	13.5868	13.1109	13.133	13.6067	13.1242	13.016	13.6538	13.5623	13.4202	13.1793	13.328	13.361	13.0679	13.5959	12.6547	13.5209	13.6851	13.7855	12.3923	13.2478	13.6762	13.5482	13.3379	13.8935	13.6462	14.5953	13.2864	13.3309	13.6986	13.0769	13.2063
VASN_HUMAN	Q6EMK4	Vasorin	6	6	0.302279	-0.10078	0.59413	-0.0638849	0	0	12.9849	13.3736	12.9734	12.3612	12.6794	13.1053	11.9457	12.8875	12.6829	12.3277	12.0874	13.0432	12.3937	12.833	12.6578	13.0048	13.234	12.6919	12.6928	12.6309	12.6257	13.2294	12.8759	12.4742	12.9882	13.2588	12.7623	12.8871	12.5998	13.5222	12.8204	13.3699	12.9232	12.4675	13.0397	12.8118	12.2428	12.6551	12.9801
CADH5_HUMAN	P33151	Cadherin-5	16	15	0.988566	-0.0106592	0.661413	-0.0631432	0	0	14.8163	14.5924	14.3112	14.7529	14.0508	14.4414	13.3563	14.1238	14.2702	14.3021	14.3466	14.2489	14.9079	14.8688	14.4546	14.795	14.3635	14.3531	14.6147	14.4917	14.0769	14.5937	14.1295	13.9541	14.5594	14.455	13.369	14.449	14.7099	14.3587	14.5162	14.7466	14.334	14.1036	14.652	14.2611	14.8806	14.4814	14.2225
CALM_HUMAN	Q96HK3	Calmodulin	5	3	0.99564	-0.00699582	0.693635	-0.0631074	0	0	12.9337	12.3845	12.287	11.3292	12.3107	12.1426		13.3589	12.999	12.7929	13.1171	12.5685	12.1415	12.0257	12.5742	12.6581	12.46	13.1846	13.2308	12.934	13.2996	12.2472	12.0693	12.4341		13.5714	12.1072	12.3081	13.3277	12.6252	12.3706	12.8656	12.8202	13.1681	12.6083	12.0942	13.1217	12.3616	11.9627
FA20A_HUMAN	Q96MK3	Protein FAM20A	2	2	0.994708	-0.0377805	0.992953	-0.0627241	0	0					14.5145																13.6567
MYH4_HUMAN	Q9Y623	Myosin-4	3	1	0.0713319	0.812659	0.782549	-0.0625538	0	0	9.58879				10.0715	10.507											10.2475					10.784								10.3961						10.2926	10.3045
MON2_HUMAN	Q7Z3U7	Protein MON2 homolog	3	2	0.664572	-0.0792953	0.767367	-0.0620835	0	0	19.6282	18.5001	19.1497	19.1705	18.3412	19.0091	18.6597	19.564	19.8059	18.9747	19.6751	19.0616	20.5967	18.7519	18.5543	18.9501	19.2036	19.0988	19.4515	18.7041	18.8366	19.123	19.2663	19.1128	19.0138	19.7791	18.5908	18.6511	19.6977	18.9403	18.8294	19.0772	18.6009	19.1005	18.9529	19.0679	19.8407	18.9732	18.719
CAD11_HUMAN	P55287	Cadherin-11	3	3	0.014765	-0.00532346	0.835363	-0.0616007	--	0	10.1287		10.4345		10.0756	10.7361		10.5579		11.1166	10.1732				11.0535		10.2059	11.142	11.1884	11.0808	11.368		10.4532	10.2162	10.9557	10.6159	10.4646	10.4661	10.5444		9.88695	10.6765	10.6968			10.6785	9.84445
SPB9_HUMAN	P50453	Serpin B9	5	5	0.457353	0.191279	0.929008	-0.0614493	0	0			10.558	10.3296					10.03								11.8885				10.0501	10.3553		9.94947					10.5201	10.5714			10.4988				9.95671		9.86475
MICA1_HUMAN	Q9HAA1	Protein-methionine sulfoxide oxidase MICAL1	2	1	0.553075	-0.353269	0.967454	-0.0593335	0	0					11.1226				13.1004						11.4297			12.312	11.6565	11.0939					11.8198			11.6227	12.4002				13.4309
PEBP1_HUMAN	P30086	Phosphatidylethanolamine-binding protein 1	6	6	0.00249774	-0.126715	0.821932	-0.0591723	--	0	12.8263	13.1052	12.0266	12.4177	12.6907	12.7062	12.0644		13.5826	13.1149		12.4721		12.4878	12.9131	12.6844		13.1181			12.303	12.4101	13.1038			13.7277	12.6271	11.9741	13.453	12.9392	12.8334	14.3893	13.6412				13.4388	13.4514	13.0611
AMBP_HUMAN	P02760	Protein AMBP	53	53	0.809759	-0.0244441	0.300801	-0.0584605	0	0	20.6248	20.384	20.5688	20.3207	20.2843	20.6182	20.1365	20.8414	20.5726	20.3912	20.5353	20.7315	20.489	20.4401	20.3748	20.973	20.3515	20.676	20.5982	20.6162	20.7343	20.6847	20.5334	20.2179	20.6861	20.6017	20.6656	20.785	20.7229	20.4141	20.4997	20.6196	20.6982	20.6575	20.6947	20.1446	20.6081	20.7358	20.598
PDE8A_HUMAN	Q96T71	High affinity cAMP-specific and IBMX-insensitive 3',5'-cyclic phosphodiesterase 8A	2	2	0.996028	0.0195118	0.954799	-0.0575558	0	0	9.04564		10.2142	9.93268		10.9418		9.80027		11.6381	10.9725		10.4342	10.7345	10.7677			11.6214	11.6324	11.178	11.0909					12.2202			12.1089			10.6795			11.331		10.2348
TFR1_HUMAN	P02786	Transferrin receptor protein 1	13	13	0.953401	-0.0830494	0.969923	-0.0574312	0	0		12.8886		13.1913		12.3158		11.5036	12.5989		12.8754				12.1676					11.9322		12.4649	12.538			10.4501			12.8288	12.2526		12.6477				12.7741		12.6468
ARPC4_HUMAN	P59998	Actin-related protein 2/3 complex subunit 4	2	2	0.460368	-0.0907515	0.721818	-0.0570889	0	0	12.6421	12.7702	12.0911	12.0452	11.3443	11.9931	12.1528	12.4347	12.1268	11.8995	11.6586	11.6824	11.9596	12.9302	12.2103	11.6781	12.6937	12.9892	11.8807	12.6176	12.8586	11.7995	12.3284	12.2841	11.8932	12.096	12.2054	11.947	12.6388	12.3438	11.9017	13.4061	12.6112	12.5101	12.1361	12.1823	12.3908	11.7467	11.996
PDC6I_HUMAN	Q8WUM4	Programmed cell death 6-interacting protein	6	6	0.87391	0.045445	0.797592	-0.0569724	0	0	13.9312	13.9422	14.9182	14.8224	14.1669	14.7424	14.7553	14.3042	13.7739	15.0506	15.9629	14.606	14.7574	14.8034		15.3598	15.2925		14.6915	14.6672	14.7844	13.9651	14.4483	14.9776	15.251	13.9041	13.6142	15.131	14.5469	14.7554	14.9651	14.7608	14.7426	14.9618	14.7088	15.2062	14.6317	15.1504	13.7207
ANGL3_HUMAN	Q9Y5C1	Angiopoietin-related protein 3	11	11	0.523249	-0.197924	0.939282	-0.0565958	0	0	12.1636	12.2137	12.3799	12.621	12.0362	12.5568	12.4121	11.929	11.906	12.4232	12.4343		12.8493	12.8072	11.8352	12.5043	12.5134	14.9099	12.3394	12.6587		12.0058	11.5664		12.4673	12.8195		7.39983	12.8293		11.618	12.4039		11.8935		12.1219	12.3235	12.5014	11.7852
FCRL5_HUMAN	Q96RD9	Fc receptor-like protein 5	9	8	0.696223	0.052583	0.647953	-0.0563393	0	0	14.0028	14.1932	13.7035	13.5767	13.6574	13.8868	13.9818	13.7879	14.0617	14.1711	15.2526	13.6682	12.6555	14.1207	13.9062	13.9415	13.8599	13.9583	13.8886	14.6271	13.9569	13.5046	13.6106	14.1114	14.1095	14.2634	14.029	13.5521	14.1817	14.1149	14.0349	14.4552	14.1646	14.0674	14.4044	13.399	13.7464	13.9196	14.0334
ANXA6_HUMAN	P08133	Annexin A6	18	16	0.999703	-0.00184162	0.749455	-0.0559965	0	0	15.3924	14.9946	14.8372	14.6511	14.7882	15.5731	14.1934	15.2578	15.5195	15.4699	15.5199	15.4461	15.2311	15.4086	14.7049	15.1742	15.2387	14.8824	15.4482	14.7307	14.6477	15.1574	14.7148	14.9401	15.4767	15.794	14.2639	15.2462	16.0802	15.2203	15.8196	15.5416	15.0959	15.7927	15.0768	14.9889	15.3275	15.2082	14.4545
BGH3_HUMAN	O43219	Transforming growth factor-beta-induced protein ig-h3	33	33	0.655294	-0.0545007	0.628674	-0.0558475	0	0	10.9551	11.2882	10.9487	10.6029	10.727	10.9824	10.6312	11.3188	10.9245	11.0147	11.3004	11.1182	10.8349	11.5917	10.9009	10.6719	10.7998	11.1648	10.798	11.0213	11.1804	10.7719	11.0329	10.5222	11.4296	11.2531	10.9811	10.6873	11.2318	10.869	11.079	11.2093	10.6973	10.649	10.859	10.9871	10.5251	10.8182	10.6934
EPCR_HUMAN	Q9UNN8	Endothelial protein C receptor	6	6	0.657367	-0.0683194	0.74411	-0.0558083	0	0	16.2603	16.9044	15.9602	16.4414	16.4746	16.3186	15.9905	15.6386	16.2078	16.0887	15.8184	17.0303	15.92	16.2894	16.6205	16.7215	16.0816	16.3482	16.3617	16.5057	15.7555	16.8272	16.124	16.0409	16.5551	16.8808	16.3833	16.1568	16.3531	16.5825	16.6087	17.22	16.5143	15.853	17.0162	15.2657	15.9643	17.4725	16.4818
EMAL2_HUMAN	O95834	Echinoderm microtubule-associated protein-like 2	3	3	0.727677	-0.0704665	0.811286	-0.0556086	0	0	12.5836	12.5834	13.1537	13.3354	12.9395	13.5707		13.5283	13.1992	12.4415	13.4474	13.636	13.3625	14.336	13.3134	13.5395		12.5192	13.0793	13.4913	12.4996	13.651	12.8067	13.5166	13.2014	13.359	12.3321	12.8454	13.2936	13.2354	13.2686	13.0716	13.5686	13.9881	12.7066	13.2559	13.3018	13.2751	12.8836
CA2D1_HUMAN	P54289	Voltage-dependent calcium channel subunit alpha-2/delta-1	5	5	0.814313	0.124213	0.958763	-0.0546395	0	0	10.3085	14.1791	14.8924	14.3698	12.2783	13.8038	13.2981	14.6042	13.6424	12.5655	14.7084	15.2989	14.7172	14.5614	11.737	15.3645	11.9086	11.4014	11.4921	11.2394	13.5207	15.1221	10.9189	14.4901	14.9368	14.824	11.9508	14.797	14.678	14.3008	14.739	15.1412	14.9143	13.4659	14.7041	14.8902	15.2154	14.6234	13.7507
TXNL1_HUMAN	O43396	Thioredoxin-like protein 1	5	5	0.164933	-0.280645	0.916131	-0.0543667	0	0	12.8335	12.0472	11.5045	11.1145	13.2685	12.5231	12.0667		11.7487	10.8205	10.8811	12.7426	12.8088		10.7468	11.9729	12.5277		10.6307	10.7117	11.1238	13.0265	12.9584	12.0829	11.5375	12.5668	12.7796	13.1723	12.8434	12.5786	11.7327	12.7067	12.1522	11.5085	13.092	12.7411			12.2112
TAGL_HUMAN	Q01995	Transgelin	11	11	0.0306388	-0.193896	0.724459	-0.0542452	-	0	16.5251	16.6209	16.4292	16.1584	16.2747	16.3684	16.0524	16.7911	16.3288	16.348	16.8941	16.4638	16.355	16.3957	16.8387	17.1766	16.556	17.002	16.3902	16.2697	16.1833	16.9508	16.5277	16.4598	16.6405	16.519	16.1406	16.0219	16.8714	16.6802	16.8741	17.4748	16.6727	15.7207	16.6685	16.236	16.5022	17.3072	16.6109
FA10_HUMAN	P00742	Coagulation factor X	35	32	0.0018429	-0.178148	0.507744	-0.0528236	-	0	15.2766	15.1031	15.2106	15.7821	15.5336	14.6469	15.1469	15.5271	15.3379	14.9275	15.1714	15.3087	15.2152	14.9962	15.3761	14.9797	15.3032	15.5982	15.1151	15.4458	15.0243	15.4276	15.576	15.3686	15.3338	15.394	15.3633	14.9479	15.5849	14.8382	14.6906	15.6624	15.3605	15.409	15.3017	15.6068	15.1992	14.7659	15.2106
C1QA_HUMAN	P02745	Complement C1q subcomponent subunit A	18	18	0.856611	-0.0330954	0.666435	-0.0527138	0	0	12.7561	13.0045	12.6213	12.4463	12.6119	13.2884	12.5857	12.4511	12.6966	12.2019	12.4006	12.1377	12.9117	13.0587	12.624	12.9445	12.3693	12.9535	13.1001	12.7642	12.7731	12.8076	12.5399	12.5268	12.7539	13.0027	12.6436	12.5135	12.8973	12.7538	12.6154	13.1887	12.3029	12.4834	13.0504	12.3509	12.6412	12.9744	12.5907
EPHA1_HUMAN	P21709	Ephrin type-A receptor 1	2	2	0.827694	-0.101819	0.944978	-0.0516898	0	0	9.57536	11.1686	10.8202			10.2348		11.1751	11.2386	10.8644					11.3582			10.9738	11.0366	11.071	10.0279		9.99429	11.2914				11.294			11.2558		11.1951	11.6947		11.6481
ZN665_HUMAN	Q9H7R5	Zinc finger protein 665	3	2	0.962819	-0.0536531	0.953768	-0.0516665	0	0		12.2878	11.9241		11.4958												12.0588					11.7726					11.6059			12.1407		12.9169							12.6713
DYH9_HUMAN	Q9NYC9	Dynein heavy chain 9, axonemal	5	5	0.22602	-0.216952	0.895781	-0.0509534	0	0	11.9779		11.5458	12.2606			11.907		11.8032	11.6666	12.2048	13.3112		12.3624		13.4012			12.5267	11.7894			12.3209	11.9973		11.4941			13.4227	12.3355	12.3785	12.2997	11.7883	12.1742		12.6346	12.1719	12.5287
TTHY_HUMAN	P02766	Transthyretin	8	8	0.879492	0.0422005	0.828123	-0.0504128	0	0	12.2555	11.8414	13.2576	12.3271	11.3166	12.4886	11.7315	12.126	12.2053	11.8115	11.7835	12.8136	12.2983	11.8207	11.5961	12.7097	11.9046	12.2786	11.3958	11.8296	12.3306	11.9421	12.3383	12.311	12.0584	12.7686	11.4454	12.1864	12.2933	12.4904	12.8344	12.0451	12.6549	12.0836	13.1815	11.1514	12.2358	12.4377	12.7227
MINT_HUMAN	Q96T58	Msx2-interacting protein	3	3	0.756631	0.0806455	0.887797	-0.0503409	0	0	12.8916	12.6141	12.5719	11.6672	12.1153	12.5424	10.9366	13.3206	12.4418	11.9801	13.0638	12.1798	13.0279	12.554	12.7383	12.9711	13.0588	12.2397	12.374	11.1825	12.4842	13.5126	11.2952	13.0706	12.4463	13.3738	10.7584	12.7664	12.8244	12.435	13.135	12.9174	12.193	13.7768	12.6143	12.3421	12.1605	12.5589	12.7957
ALDOC_HUMAN	P09972	Fructose-bisphosphate aldolase C	5	2	0.982296	0.0181553	0.867673	-0.0501508	0	0	18.1104	19.8116	17.3534	17.3235	17.044	17.5446	16.7126	18.7124	17.6596	17.0159	18.1391	18.2509	18.9517	17.446	17.87	17.9162	17.751	17.9828	17.4292	17.62	18.0537	18.0285	17.9918	17.7778	17.732	18.3926	19.914	19.4625	17.4946	17.9966	18.4186	18.1631	17.864	18.3023	17.5154	17.5199	17.1121	17.9016	17.3155
COPB2_HUMAN	P35606	Coatomer subunit beta'	2	2	0.852203	0.114214	0.970235	-0.0492652	0	0				10.5479																	9.9051		10.0203				10.0777										10.388
AFAM_HUMAN	P43652	Afamin	99	99	0.760499	0.0421629	0.682376	-0.0487999	0	0	19.3816	19.1062	18.9762	18.6248	18.4646	18.7061	18.4313	19.9183	19.0692	18.4657	19.3706	19.5621	19.6555	19.078	19.1462	18.954	18.9723	19.4348	18.9682	19.2819	19.5727	18.6493	19.3019	19.0284	19.0977	19.6769	19.2743	19.3751	18.7176	19.1348	19.889	19.2727	18.1859	19.7555	19.1217	18.9391	19.0729	19.2682	18.9635
1433T_HUMAN	P27348	14-3-3 protein theta	8	4	0.704602	-0.114456	0.932293	-0.0475813	0	0	12.1479	12.7331	12.9519	12.2323				11.3031	12.071	11.5915	12.2156	12.0566		11.1567	10.5647			12.0863	12.3422	11.7815		12.159	11.404	11.3307	12.3829			11.7508				11.4707	12.2938	13.1617				12.3028
TLN1_HUMAN	Q9Y490	Talin-1	124	114	0.571308	-0.0480295	0.562968	-0.0475503	0	0	16.997	17.0844	16.5757	16.3197	16.4618	16.5793	16.3589	17.0888	16.5553	16.952	16.7548	16.9677	16.8837	16.3554	16.6134	16.9117	16.687	16.8428	16.8302	16.6019	16.0374	16.9503	16.7233	16.4024	16.8711	16.9309	16.6668	16.8005	17.5188	16.7837	16.8321	17.3298	16.8254	17.256	17.0675	16.8597	16.8442	17.1284	16.7635
RELN_HUMAN	P78509	Reelin	14	14	0.591174	0.0795676	0.822023	-0.0470076	0	0	12.8732	14.1814	14.4996	13.5593	14.2777	14.766	15.0785	14.0445	13.3504	14.7215	13.9998	13.2133	13.5797	14.1845	15.3495	14.4883	14.7326	14.5312	14.6417	14.0915	14.4158	14.2116	14.0361	14.4445	14.6288	14.1677	13.7894	14.512	14.1716	13.7213	14.2864	14.6284	14.4635	14.5496	14.3942	14.1624	14.3651	14.1652	14.8709
MINP1_HUMAN	Q9UNW1	Multiple inositol polyphosphate phosphatase 1	12	12	0.99183	-0.011698	0.869111	-0.0462051	0	0	16.5767	15.9659	16.1477	15.7274	15.5644	16.0918	15.7984	15.9498	16.6085	15.2321	15.9238	16.3884	15.9798	17.0757	13.9925	16.0108	16.6351	16.3104	15.6017	15.2114	16.2032	16.1871	16.018	15.8127	15.858	16.1798	15.6617	16.0082	16.038	16.2417	15.785	16.2821	16.059	16.4555	15.8304	15.749	16.2268	16.2188	15.6917
1433Z_HUMAN	Q6IN74	14-3-3 protein zeta/delta	16	11	0.998811	0.00512452	0.904501	-0.0460977	0	0	13.139	13.7389	13.5564	12.9914	13.0109	13.1304	14.6513	12.1275	12.7331	12.775	12.9394	12.9797	13.7478	12.3983	12.1405	12.7513	13.0831	15.2247	12.7978	12.843	12.3418	13.1501	12.3951	12.3144	14.2836	12.6584	11.8735	12.6972	12.7519	12.7312	12.4409	12.5605	13.0459	14.105	12.7067	12.9957	13.057	13.3558	12.4145
NIF3L_HUMAN	Q9GZT8	NIF3-like protein 1	4	4	0.936837	0.0373458	0.902455	-0.0457502	0	0	13.8435	14.374	13.4834	13.4132	12.8709	13.7196	12.4614	14.4581	14.3629	13.7157	13.568	14.514	13.1524	13.7618	13.6989	14.6039	14.1387	12.8525	13.8515	13.6659	13.794	14.7509	12.9148	13.5505	12.9874	15.5749	11.9701	13.9528	14.3858	13.4123	14.2041	14.1234	14.2242	14.1563	13.6217	14.0827	14.4927	14.5493	14.1561
CATZ_HUMAN	Q9UBR2	Cathepsin Z	5	5	0.902578	-0.0353555	0.835631	-0.0453043	0	0	12.5967	12.8736	13.7658	13.6013	12.9062	13.2592	13.4323	12.9156		13.474	14.0496	13.7723	14.137	13.4047	12.7285	14.1109	13.761	12.5287	13.1553	12.9748	13.0226	13.1411	12.9405	13.839	13.5656	13.5149	13.0459	13.5236	13.313	13.4104	13.4349	13.1823	13.0733	13.0386		13.5896	13.6008	13.7507	12.4359
PAPOA_HUMAN	P51003	Poly(A) polymerase alpha	2	2	0.923807	0.0517844	0.940396	-0.0448088	0	0	12.9645	14.3769	13.7654	12.8459	12.8815	13.424	11.7188	14.9408	14.0648	12.93	14.2936	13.3695	12.3053		13.6752	14.1706	13.3234		13.6079	14.8057	13.8607	14.6324	11.5855	13.2675	13.9829	14.8839	12.9318	13.2447	13.3066	13.603	13.4006	14.6978	14.0319	13.3482	13.8494	13.2095	13.9809	13.3143	14.4857
DYH10_HUMAN	Q8IVF4	Dynein heavy chain 10, axonemal	4	4	0.913953	0.0466524	0.902132	-0.0446923	0	0		12.0542		10.7533							10.8898				10.1442		10.7599			10.7772												11.3235
NCF4_HUMAN	Q15080	Neutrophil cytosol factor 4	3	3	0.954676	0.0413512	0.954562	-0.0445224	0	0			11.1624			11.4442	9.43673	11.445	11.2384	12.2075	11.3864			10.2987		11.7502		11.5008	11.6438	11.0465				10.7289		12.2767		11.2146	11.8815				10.308			11.6056	12.0594
ASPG_HUMAN	P20933	N(4)-(beta-N-acetylglucosaminyl)-L-asparaginase	6	6	0.356403	0.192541	0.946666	-0.0437137	0	0	10.5334	11.2872		11.2886		9.06705	10.5036	10.93	10.7935	10.2377	11.6399	9.93492	10.2241	10.6956	10.468	12.1156	10.8848	9.32413	11.5198	10.3763	11.2872		10.7067	10.0418	11.0398	11.2063	10.23	12.2204	11.1133	11.3998		11.7273	10.2129	10.8097		9.66781	11.0763	11.6452	10.007
GRP78_HUMAN	P11021	78 kDa glucose-regulated protein	26	25	0.581557	-0.0540587	0.691839	-0.0433214	0	0	11.9913	11.6894	11.878	11.4609	11.902	12.1689	11.8426	11.6943	11.7569	11.7133	11.989	11.7809	11.6423	12.3468	12.1257	11.9606	12.2405	11.9171	12.3084	11.8506	11.6416	11.9184	12.0222	11.8533	12.1257	11.4753	11.3807	11.8029	12.2895	11.8702	11.7865	12.2897	12.0696	12.2786	11.7861	11.5217	12.0906	12.1356	11.6395
COR1A_HUMAN	P31146	Coronin-1A	17	15	0.999461	0.00831845	0.981424	-0.0432174	0	0	10.5754	12.2446	12.3874	12.487	9.92476	11.6101	8.9947	10.657		10.9628				11.3531	8.66174		11.7989			9.17074			11.0195			13.7106	10.5414		9.86743	11.8363		12.9902	10.4727		11.2219	10.5268	11.1509		12.3062
TRFE_HUMAN	P02787	Serotransferrin	83	81	0.904505	0.0605706	0.948108	-0.0430239	0	0	14.1091	14.7211	14.7191	14.769	14.0644	15.0595	13.9271	15.0013	16.7414	14.8582	14.1991	16.4086	14.4226	14.823	16.6519	15.2551	14.5556	15.1195	14.7837	18.5137	14.4204	16.6771	14.882	14.1128	14.4901	14.3525	18.4286	14.8008	14.7015	15.1356	14.9569	16.0649	14.062	15.2113	15.2606	14.8432	14.9981	15.0044	14.7567
NDKB_HUMAN	P22392	Nucleoside diphosphate kinase B	4	1	0.901514	-0.0986114	0.975486	-0.0428183	0	0	12.2262			10.1668		10.4044		10.9798	11.1215					11.4016		11.2626								10.7202		11.3328			11.0618				11.3987				12.2257	11.3158	11.2914
C1R_HUMAN	P00736	Complement C1r subcomponent	55	54	0.380501	-0.0866518	0.777614	-0.0423757	0	0	17.2547	17.0188	16.8127	17.0487	17.3699	17.4931	16.8988	16.5369	16.3176	17.2814	16.2247	16.498	17.1309	16.8448	16.4137	17.1265	16.498	16.4443	16.9766	16.8909	16.4115	16.6405	16.2695	16.2507	16.8881	16.3707	16.2737	16.7897	16.7017	16.5147	16.4074	16.9709	16.4401	16.6473	16.7905	16.9505	16.3791	16.5484	16.4105
TRI48_HUMAN	Q8IWZ4	Tripartite motif-containing protein 48	2	1	0.655418	-0.258917	0.99555	-0.0422471	0	0							10.7352													12.8874																			10.2428
PURA2_HUMAN	P30520	Adenylosuccinate synthetase isozyme 2	2	2	0.966404	0.0206687	0.863528	-0.0417901	0	0	13.4058	13.7251	12.8657		12.975	13.1273		13.6125	13.8922	13.7676	12.9253		13.2871	13.1853	13.8145	13.5643	13.6327	13.2453	13.541		13.5263	12.9524		13.2946	13.9218			13.1529	14.1692	13.3964	13.3118	13.5475	13.2533	13.469	13.3198	13.4497	13.374	13.4041	13.7838
ZA2G_HUMAN	P25311	Zinc-alpha-2-glycoprotein	41	41	0.51271	0.0546605	0.666426	-0.041322	0	0	16.3003	18.6268	18.761	18.8066	18.8428	19.1133	18.7754	19.0904	19.0251	18.7454	18.9688	18.8804	18.8412	18.6468	19.0248	18.9758	19.0545	18.6965	18.331	18.8186	18.4953	18.532	18.9331	18.8332	18.8024	18.8796	18.6414	19.3742	18.739	18.5174	18.8906	18.9472	18.8465	19.0586	19.0533	18.7171	18.8531	19.0489	19.1532
CNTN4_HUMAN	Q8IWV2	Contactin-4	4	4	0.314921	-0.121034	0.870544	-0.0399901	0	0	10.5888	10.8754		10.6218	10.5349				10.5173						10.2333					10.9632	10.2501		10.8438	10.4015			10.5843	10.6469		10.5925		11.5895	10.7276	10.3581					10.5584
SPON1_HUMAN	Q9HCB6	Spondin-1	3	3	0.855999	-0.0998978	0.971567	-0.0392827	0	0	11.2454	11.7858	11.9499	11.4773				11.7261						10.7097				11.143	11.8175	10.8991	10.528	11.7958		11.1065	11.9499		11.6316		12.1617			11.0685	11.4884	12.1115				12.2957	11.5989
BST1_HUMAN	Q10588	ADP-ribosyl cyclase 2	6	6	0.531726	-0.105954	0.914765	-0.0388728	0	0	11.3105	11.3119	12.2592	11.5771	11.2314	11.3804	11.2513	13.3218	13.257	11.7871	11.8913	11.3249	11.6164	11.7305	12.0514	11.6665	11.5615	11.2052	11.7479	12.2715	10.9938	11.6007	11.5178	11.555	11.7555	12.349	11.9742	11.7273	12.6838	11.7074	12.5556	11.8346	13.0411	11.1628	11.8235	11.4991	13.4964	12.6919	11.6249
FBLN7_HUMAN	Q53RD9	Fibulin-7	2	2	0.00413439	-0.427874	0.944996	-0.0384798	-	0	12.4992	11.8259	11.7089	12.9491	12.1583	11.8836	12.4115	11.1309	13.063	11.7922	12.1586	12.9006	11.689	12.1577	13.0963	12.8628	11.3209	12.1772	11.7964	11.8026	11.181	11.6411	12.481	12.0282	11.8671	13.4795	12.934	11.5617	13.0384	12.341	12.6113	13.9857	13.6042	11.8266	12.6691	11.3607	12.7476	13.6524	12.9701
GOLM1_HUMAN	Q8NBJ4	Golgi membrane protein 1	8	8	0.976119	-0.0121886	0.800816	-0.0362892	0	0	11.7918	12.1656	12.1232	11.5656	12.1615	11.8794	11.0247	12.4727	12.1199	11.6844	11.8883	12.1595	12.16	11.9044	12.3025	12.5077	12.2179	12.1128	12.2146	12.2511	11.4956	12.9608	11.8569	11.7551	12.1708	12.5219	11.6497	12.1831	12.094	11.9343	12.6972	12.2855	12.217	11.8907	12.5841	11.8808	12.2364	12.3493	12.1734
PON3_HUMAN	Q15166	Serum paraoxonase/lactonase 3	9	7	0.316521	-0.105757	0.863635	-0.0361981	0	0	9.97142	9.8674	9.87732	10.0911	10.7685	10.9296	8.96941	10.0663	10.4986	10.0872	10.4697	10.6031	10.5365	9.95253	10.3642	11.6167	10.1663	9.75115	9.50544	10.2969	9.76535	10.1758	10.2545	9.64242	10.0275	10.4404	9.49037	10.0545	10.9768	10.6889	10.2926	9.74522	10.2426	10.3004	11.0598	10.116	10.1911	10.4693	10.7192
PAMR1_HUMAN	Q6UXH9	Inactive serine protease PAMR1	3	2	0.873209	-0.0794052	0.973629	-0.0355189	0	0			13.2643	13.2608		12.7416	13.2524	12.4366	12.4478		14.9294	13.1859	13.1743	12.4251	11.2464	12.8796	13.2571	12.1648		12.9723			12.8912	13.3069		12.259	10.361	12.6907	14.0295	12.7362	13.0814	12.4872	12.6055	12.8365	12.829	13.7947	13.6375	13.7086	11.1267
F198A_HUMAN	Q9UFP1	Protein FAM198A	4	4	0.0305867	-0.120994	0.980199	-0.0352483	--	0	11.4385		11.3118			12.1324	11.6218			11.3482			11.7593		10.2532		11.9406			10.8412	10.6131		11.6464	11.6752			11.1999									12.2733
PTPRF_HUMAN	P10586	Receptor-type tyrosine-protein phosphatase F	9	9	0.492286	0.243358	0.987124	-0.0352027	0	0										10.4914		11.4049																										11.6901
STK24_HUMAN	Q9Y6E0	Serine/threonine-protein kinase 24	2	1	0.805991	-0.218156	0.987368	-0.0348003	0	0			11.8509						11.5058					12.1072				12.2878									12.3812
ITIH2_HUMAN	P19823	Inter-alpha-trypsin inhibitor heavy chain H2	134	133	0.908158	0.0187671	0.72336	-0.0338241	0	0	19.8026	19.98	19.882	19.7049	19.5572	20.1002	19.2991	20.2098	19.8553	19.6005	20.022	20.0562	19.7468	19.8931	19.7333	20.0866	19.8277	20.3081	20.2255	20.0764	20.4128	20.1252	19.741	19.7514	20.2774	20.3182	20.2284	19.914	19.9843	20.0153	20.0199	20.1447	20.3697	20.034	20.1977	19.5337	20.0577	19.9369	19.9168
CTGF_HUMAN	P29279	Connective tissue growth factor	2	2	0.71192	-0.134406	0.978639	-0.0331507	0	0	11.5434	11.4298	12.04	12.4186	11.3378		11.6505	13.5813	13.1227		14.0382	12.8827	13.0272	12.0264	11.0521	14.2584	12.327			12.2379		12.0445		12.8053	12.1072	12.8627		11.9335		12.0022	11.9446		11.3176		12.2451	13.6583	13.4044	12.4965	11.9645
GELS_HUMAN	P06396	Gelsolin	81	81	0.76491	-0.0349706	0.783605	-0.0325509	0	0	17.5605	17.4678	17.0847	17.4701	17.4953	17.4063	17.0992	17.3138	17.2082	16.6906	17.4679	17.4504	17.4642	17.3444	17.638	16.6428	17.2742	17.4749	17.2074	17.6207	17.3425	17.266	17.309	17.4485	17.4198	17.4082	17.4223	17.4758	17.3752	16.9961	17.3146	17.2872	17.5521	17.3301	17.571	17.1341	16.853	16.9735	17.1314
ZFAT_HUMAN	Q86X64	Zinc finger protein ZFAT	2	2	0.547624	0.072946	0.870041	-0.0325194	0	0	10.7691			10.72		10.8716		10.4941	10.9286	10.6488	11.1658			11.3898				10.9766		11.4986	10.9046		10.9347	11.0324			10.4754		11.1369	11.226		11.1942	11.0832	11.1302		11.0114	11.2756
ANGT_HUMAN	P01019	Angiotensinogen	67	66	0.883515	0.0235609	0.784703	-0.0323008	0	0	20.535	20.3305	19.9129	20.2395	20.1467	20.0292	20.0071	20.0849	20.4503	20.143	19.8566	20.1841	20.6593	20.2282	20.4112	20.2267	20.318	20.2591	20.5023	20.4196	20.1074	20.1775	20.5748	20.4169	20.6305	20.2459	20.2809	20.5067	20.3577	20.4577	20.4862	20.7215	20.6383	20.4963	20.6666	19.7244	20.3621	20.4824	20.3411
TAOK3_HUMAN	Q9H2K8	Serine/threonine-protein kinase TAO3	2	2	0.159596	-0.796693	0.996339	-0.032227	0	0														18.111				18.2994	18.6877			18.2602			18.6714									17.8508	18.6076
IBP5_HUMAN	P24593	Insulin-like growth factor-binding protein 5	11	11	0.794408	-0.0562211	0.928226	-0.0321286	0	0	11.0723	11.3374	11.7169	11.4699	10.8059		11.1339	12.066	11.0701	10.7711	12.0049	11.7632	12.2362	11.9264	11.7305	12.4411		11.8347	10.8962	10.9363	11.611		11.3863	11.2669	12.1002	12.0571	11.7328	10.9948	11.8825		10.8805	11.4029	11.8838	11.5168	11.2207	11.11	11.6667	10.9761	10.6484
CO3A1_HUMAN	Q6LDJ2	Collagen alpha-1(III) chain	4	4	0.99525	0.00586827	0.855983	-0.0314574	0	0	12.0218	11.2928		11.8363	11.5749	11.8271		11.6113	11.833	13.1016	12.0988	11.4486	11.689	11.6774		11.5528	11.4031			11.2867	11.7905	11.8041	11.098	11.6134	12.1612	11.9527	11.3478	12.0359	11.8247	11.5434	11.2539	11.6276	11.1904	11.609	11.8603	11.1987	12.0469	11.5878	11.4172
VSIG4_HUMAN	Q9Y279	V-set and immunoglobulin domain-containing protein 4	4	4	0.143363		0.878345	-0.031422	0	0										10.492										10.508
FHR1_HUMAN	Q03591	Complement factor H-related protein 1	37	7	0.939769	-0.0186804	0.837144	-0.0309584	0	0	19.5042	19.5737	19.307	19.0886	19.461	18.2733	19.3479	19.4558	19.7815	19.6278	19.575	19.8755	19.8558	19.0148	19.4302	19.1888	19.4698	19.4514	19.6635	19.6708	19.7033	19.3936	19.2954	19.4406	19.367	19.6457	19.3146	18.7295	19.8272	19.7783	19.635	19.3609	19.4208	19.5631	19.2065	19.7295	19.7534	19.7195	19.5247
AGRG6_HUMAN	AGRG6_HUMAN	AGRG6_HUMAN	11	11	0.664194	-0.0869684	0.944506	-0.0305539	0	0	12.0421		12.0898	11.6287		12.2157	11.8678	12.1581	12.3095	10.6502	11.957	11.241			11.8559		11.9798	12.3585			10.7563	12.6887	12.2424	12.1025	12.8094	13.048	11.8912	11.7714	12.444	12.7391	12.5427	13.1013	12.4495		12.1064	11.9185		12.4821	12.7124
RNAS4_HUMAN	P34096	Ribonuclease 4	4	4	0.0357595	-0.254698	0.945129	-0.0302809	-	0	12.136	12.2946	12.8911	11.3657	13.6046	12.5993	11.4949	12.7845	12.3735		12.7705	12.5621		11.2101	11.3697	13.229	13.246	12.6251	12.0607	12.2202	12.7096	12.0999	12.0013	12.8913	13.6439	11.9917	11.7062	11.9172	13.8654	12.2656	12.6887	12.624	11.7168	12.3007	12.4409	12.4628	12.4609	12.9732	11.7836
PGBM_HUMAN	P98160	Basement membrane-specific heparan sulfate proteoglycan core protein	29	29	0.618964	0.0522786	0.845744	-0.0296568	0	0	12.7896	12.9804	12.9461	12.7668	12.5692	12.851	12.1767	13.0814	13.1194	12.9718	12.8935	12.5791	12.5708	12.9819	12.8051	13.0817	12.5491	13.0987	13.7795	13.0184	12.8757	12.828	13.085	12.4406	12.8369	13.8819	12.9477	12.2531	13.4238	13.3381	13.0767	13.335	13.3196	13.1822	12.7941	13.1433	12.879	12.6796	12.8407
AMPN_HUMAN	P15144	Aminopeptidase N	26	26	0.989211	-0.0129262	0.941956	-0.0294208	0	0	11.597	11.0486	10.7884	9.73857	10.8467	11.0515	10.1137	11.3977	11.0313	10.7871	11.4334	10.567	13.1483	11.3074	11.106	11.2566	11.5003	10.744	11.0656	11.267	10.5632	10.9403	10.6251	11.8181	11.2745	11.6931	10.301	11.3114	11.6414	10.608	11.2275	11.8057	11.5851	12.4705	10.8476	11.094	11.1773	11.7455	11.0893
ZYX_HUMAN	Q15942	Zyxin	8	8	0.88741	-0.0413619	0.948221	-0.0268859	0	0	12.5747	12.8078	13.0918	13.0319	14.3237	13.2515	12.3281	13.2349	12.8366	13.7288	13.2968	13.5097	13.5249	13.0217	12.8516	14.0028	12.7774	13.0933	13.6179	13.0272	12.5661	13.104	12.3834	12.7138	13.3605	13.7812	12.258	12.8737	13.9393	12.7453	13.3983	13.1578	12.1384	13.4213	13.566	14.1339	13.6652	13.3552	13.3741
MGP_HUMAN	P08493	Matrix Gla protein	2	2	0.973598	0.0466203	0.991964	-0.0265383	0	0		8.73894	11.6611	11.0323	11.1301	8.94856			10.9097	11.3646	11.7211				11.7206	11.5408	11.2807	11.7825	11.4411	8.84362	11.6378	11.6917			11.3279	11.093	10.7572	6.09031	11.3916	11.5852		9.41923	11.1974		12.1425	11.5871	10.7613	11.3381	11.2798
MK01_HUMAN	P28482	Mitogen-activated protein kinase 1	2	1	0.910557	0.141323	0.996007	-0.0261044	0	0							11.211					12.7926	11.8231					11.3988		10.6284									10.9615		12.5526
IBP2_HUMAN	P18065	Insulin-like growth factor-binding protein 2	8	8	0.511362	-0.0828893	0.928407	-0.0258609	0	0	18.2739	18.2842	17.8378	17.5191	17.7863		17.9481	17.363	18.326	17.4067	18.5721	18.145	18.5187	17.8863	17.7064	18.4919	18.0081	18.4461	17.9848	17.7404	17.7933	18.598		18.1853	18.2426	18.5637	18.0106	17.8774	18.7898	18.0626	18.3986	18.8441	18.1801	17.843	18.1401	18.2087	18.3185	18.2816	18.0522
UB2L3_HUMAN	P68036	Ubiquitin-conjugating enzyme E2 L3	3	3	0.988322	0.0272469	0.989507	-0.025203	0	0	13.3024	13.2076	12.5789	13.7964	12.1946	12.7663	16.1325	13.2518	13.9599	12.6099	13.7927	15.9288	13.4956	12.8798	12.6607	12.4449	12.5547	12.7066	12.6342	12.9902	12.5928	12.3749	16.9329	13.2067	12.5094	13.6728	12.6961	12.4774	13.5444	13.4033	12.8482	13.3559	12.8128	15.7515	13.0743	15.1132	13.6015	18.3345	11.6157
VNN1_HUMAN	O95497	Pantetheinase	13	12	0.578074	-0.0822011	0.947902	-0.0249183	0	0	10.7018	10.6886	9.75513	10.6278	9.69705	9.86502	9.7942	10.6291	10.9319	10.1982	10.6351	10.2284	10.1932	11.1404	10.6089	10.4635	9.88982	10.395	10.1077	10.1825	9.78368	10.6539	9.8917	10.2207	10.2888	11.4373	10.8792	10.4504	10.5655	11.0032		10.717	9.74112	10.6039	11.03	9.50921	10.185	10.3592	10.299
HPT_HUMAN	P00738	Haptoglobin	9	7	0.0180454	-0.00644924	0.956616	-0.0248485	--	0	11.9258	12.1394	11.985	10.7568	11.9374	11.9496	10.2229	12.0559	12.2468	11.6271	12.562	12.6937	11.2499	11.4504	11.7522	12.333	11.705	11.5542	11.9255	12.1278	11.5955	12.2053	9.95761	11.8537	11.3757	13.5147	10.8805	11.9265	11.6073	11.4446	11.8897	11.9652	12.2463	11.8355	11.9454	12.0516	11.1766	12.1221	12.2768
NADE_HUMAN	Q6IA69	Glutamine-dependent NAD(+) synthetase	2	2	0.840194	-0.417357	0.998727	-0.0247221	0	0	15.1054			15.9771			16.4573	15.2158					16.9805	15.8721																					16.1255
NOTUM_HUMAN	Q6P988	Protein notum homolog	11	11	0.999947	-0.00064079	0.919569	-0.0244216	0	0	11.1801	11.5965	11.3141	11.3505	11.1802	11.923	10.7892	10.9644	11.3652	10.9439	11.962	11.9177	11.5332	12.1614	11.7472	11.6842	11.8728	11.2817	11.2206	11.0705	11.3777	11.5699	11.3972	11.1405	11.855	11.89	11.4984	11.5866	11.9251	11.6436	11.2172	12.1505	11.2801	11.0382	11.3148	11.3511	11.1582	11.9592	11.2576
ATF6A_HUMAN	P18850	Cyclic AMP-dependent transcription factor ATF-6 alpha	5	5	0.427346	-0.191125	0.986067	-0.0238029	0	0	12.4261	12.2796	13.385	11.3925	10.2004	11.6851	11.6993	14.0753	12.7513	10.498	11.4922	13.3554	11.5734	12.7712	13.8956	13.3781	12.2713	11.8586	13.5729	12.0508	14.0008	11.7519	14.0601	13.6691	12.2115	12.2928	11.1543	12.0359	14.0762	11.638	11.9697	13.3561	12.3604	14.1903	11.3654	12.7569	12.1802	12.3162	11.7065
HS90A_HUMAN	P07900	Heat shock protein HSP 90-alpha	25	12	0.536972	0.0613119	0.906431	-0.0234493	0	0	12.9741	14.3634	14.2659	14.2033	14.133	14.0751	13.6163	13.3128	13.4586	13.8649	13.9276	13.9284	14.0328	13.2675	13.5589	14.03	14.2082	13.7552	13.8743	13.5745	13.371	13.8637	13.8293	14.3797	14.1138	14.245	13.5492	14.2996	14.2761	14.2081	14.0985	14.3038	14.1281	14.0739	14.3508	13.8729	14.0289	14.2499	13.8331
CNTN1_HUMAN	Q12860	Contactin-1	15	15	0.889898	-0.0294771	0.924651	-0.0233585	0	0	13.2056	13.7656	12.8366	12.8512	13.1373	13.4272	12.4368	13.6378	13.3698	13.2326	13.6698	13.6114	13.1803	13.4121	13.4218	13.6448	13.6658	13.1391	13.1341	13.1207	13.3075	13.3005	12.9806	13.284	13.2459	13.5622	12.748	13.4062	13.5328	13.4299	13.5677	14.1014	14.417	13.6716	13.6173	13.1401	13.3155	13.4149	13.3913
FA20C_HUMAN	FA20C_HUMAN	FA20C_HUMAN	6	6	0.955798	0.0312541	0.975257	-0.0226873	0	0	12.8639	14.047	11.6041	11.3863	11.4002	13.303	11.6844	11.7072	11.5969	10.6095	11.9367	11.9455	12.3693	11.2914	11.2504		12.1939	12.9513	10.6538	11.9259	12.5463	12.5318	12.4763	12.2129	11.4643	11.7949	12.0485	12.4613	11.784	12.7319		13.1197	12.6256	12.379	12.962	11.8675	10.8605	11.6279	12.359
PACN2_HUMAN	Q9UNF0	Protein kinase C and casein kinase substrate in neurons protein 2	3	3	0.841863	-0.0803047	0.986231	-0.0226639	0	0				9.97648				10.1385	10.0156	10.5025	11.0171					11.3526								10.4612	10.2969	9.90294			10.97	10.0545						10.9495	10.7127		9.44798
CALR_HUMAN	P27797	Calreticulin	11	11	0.971567	-0.0249771	0.977642	-0.0215664	0	0	11.2093	11.9036	11.2096	10.7392					11.2323		11.1643	11.4814		10.2757						11.1828	10.4934	10.9102	10.1422	10.8193		11.2045	11.1607		10.9837	11.0107		11.1134	11.3995	11.9901	11.3349		10.7421	11.4557	9.88369
FUCO_HUMAN	P04066	Tissue alpha-L-fucosidase	7	7	0.472712	-0.187113	0.989523	-0.0211526	0	0			11.4223			10.8324				11.7845	11.6277				11.4476		12.1467		11.8514	10.8532	11.5678			11.3508					11.9251			11.7907	11.9688		11.8664
COTL1_HUMAN	Q14019	Coactosin-like protein	8	8	0.992397	-0.0241804	0.993104	-0.0211491	0	0	11.9392		12.2596	11.7878	15.6494		15.2648		11.7185					11.0274	12.2718	12.0215	15.7196	11.7563		11.448	11.2547	12.7206	11.6376	11.1092	11.5114	11.4918	10.3386	11.2969	11.5373	11.8944		13.3298	11.4023	10.7839	11.6598	11.6832	11.7167	12.0078
GMFG_HUMAN	O60234	Glia maturation factor gamma	4	2	0.0910647	-0.223158	0.976219	-0.0207042	0	0	13.6544	14.1987	13.5443	14.1379	13.882	13.8866	12.8957	13.466	14.2894	13.3283	13.1023	14.1914	13.3704	13.7684	14.1384	13.553	13.4802	12.8699	13.2012	13.4655	12.6161	13.88	14.2466	13.651	13.8678	14.4119	14.159	13.737	13.8492	13.6786	14.0696	15.0346	15.1859	13.3505	13.1885	12.7071	14.0311	14.5361	13.9535
PARVB_HUMAN	Q9UGT3	Beta-parvin	7	7	0.00169643	-0.351263	0.988443	-0.0204337	--	0	11.3619	11.4847			11.6217	12.7396	11.9957	11.6993	12.0641	11.4067	12.7342	11.6812	11.9284	11.498	11.5849			12.7021	11.4835		11.7489	11.7327	12.3567	13.0418	11.7781	12.7976	10.4838	12.2556	12.4456	10.4631	11.8231	12.6695	12.4741	13.0135	11.5198	12.0339	12.5997	12.3174	10.3782
B4GA1_HUMAN	B4GA1_HUMAN	B4GA1_HUMAN	5	5	0.0206392	-0.34671	0.994146	-0.0200401	--	0	11.1789					12.6816														11.1801								10.6281							11.2479
MYH9_HUMAN	P35579	Myosin-9	23	16	0.410965	-0.0668604	0.916904	-0.0199531	0	0	17.5462	17.7723	17.9041	17.3449	17.2984	17.4696	17.1808	17.3565	17.9426	17.3166	17.4341	17.9453	18.4595	17.2381	17.6129	18.0114	17.9709	17.8229	17.4037	17.6269	17.5511	17.836	17.4443	17.6876	18.2054	18.0231	17.5477	17.3735	17.8686	17.454	17.9091	18.0261	17.8364	17.9991	18.054	17.487	17.9511	17.8406	17.4766
APOF_HUMAN	Q13790	Apolipoprotein F	4	4	0.226473	-0.36036	0.0242563	-0.0198894	0	++										10.9325	10.8382			10.7608	11.9355					13.0533									10.8319
CO2_HUMAN	P06681	Complement C2	55	54	0.963603	0.00983571	0.855696	-0.0197574	0	0	16.4606	16.1627	16.2603	16.2238	16.1993	16.0738	16.4157	15.9764	16.566	16.3618	15.6175	16.1504	16.1205	16.2671	16.1871	16.4361	16.0861	15.7175	16.0918	16.2159	15.8997	16.0851	16.0722	16.236	16.1351	16.2019	15.8919	16.1471	16.457	16.386	16.2022	16.2406	16.3746	15.906	16.4122	16.2884	16.0558	16.2283	15.9831
ANR12_HUMAN	Q6UB98	Ankyrin repeat domain-containing protein 12	3	3	0.221209	-0.224315	0.988281	-0.0196792	0	0	10.9293	11.3415	12.7953	12.1788	12.4553	12.4287	11.9417	12.3109	12.552	11.811	14.0177	11.4116	12.138	11.9132	11.2007	13.8846	13.0909		12.07	11.9662		12.7104	10.7916	12.3802	12.7341	13.3916	10.1143	12.5185	13.2496	12.2657	11.9298	12.2049			11.9825	13.4456	12.7596	12.2766	11.8407
SEPR_HUMAN	Q12884	Seprase	8	7	0.422025	-0.420376	0.997916	-0.019601	0	0		10.3077		9.19954	14.1541	11.6836	9.75555	11.2036	10.6892	10.2954	11.0853			11.5158	14.7176	12.3582		9.86369		14.7812	15.185	10.7965	10.4922	10.3816	14.6378		10.5937	14.6237		10.7819		11.2679	10.2149	10.2559		11.8503	10.2251
A1BG_HUMAN	P04217	Alpha-1B-glycoprotein	57	57	7.26e-05	-0.205811	0.906642	-0.0181084	-	0	20.2807	19.9705	20.1553	20.1819	19.5949	20.1973	19.7756	20.202	20.2655	20.4637	20.0848	20.2739	19.5541	20.1181	20.0095	20.2391	19.7939	20.0469	20.0966	20.1909	20.1367	20.4213	19.9883	20.3213	20.0618	20.427	20.1998	19.8039	20.0179	20.0164	20.0208	20.4349	20.3036	20.1522	20.3034	19.9236	20.2666	20.2741	19.9493
A2MG_HUMAN	P01023	Alpha-2-macroglobulin	54	33	0.174005	0.26412	0.990657	-0.018108	0	0	17.6847	18.3422	15.8842	16.3158	16.0045	16.6511	16.7536	17.6329	16.5509	17.6208	18.6043	17.492	17.289	17.0328	17.088	17.1767	17.2067	17.209	19.2823	17.2195	17.2445	16.9619	18.4809	18.734	16.3667	17.8593	17.6498	17.4395	18.2118	18.0143	17.0726	16.2737	19.8788	17.6686	17.995	16.6467	18.5651	17.6364	15.7781
RIMKA_HUMAN	Q8IXN7	N-acetylaspartyl-glutamate synthetase A	2	2	0.914362	0.123138	0.998201	-0.0179631	0	0	12.1382	15.865	13.7306	13.7716	13.6723	14.9501	12.5876	16.8265	16.8542	15.2131		12.6322		14.1305	16.53	14.0433	17.3701	11.9902	12.2061	12.1406	13.3487	16.668	16.261	14.5156	13.6084	17.3014	11.7671	14.5035		17.4044	13.0316			12.7729		12.7852	14.3074	13.233
LYAM1_HUMAN	P14151	L-selectin	6	6	0.341085	-0.0792578	0.943553	-0.017508	0	0	12.3364	12.1468	12.2289	12.0478	11.8078	12.4135	12.1208	12.1575	12.2321	12.0382	12.2132	12.4204	11.8795	12.2421	12.1587	12.1474	12.3328	12.089	12.0787	11.8641	11.6479	11.9067	11.6493	12.1002	12.4102	12.3506	11.9789	12.2901	12.0078	12.1906	12.1395	12.261	12.3389	11.8083	12.6416	12.4301	12.1992	11.7645	11.9356
MA2A1_HUMAN	Q16706	Alpha-mannosidase 2	15	15	0.793752	0.0466773	0.969969	-0.0164579	0	0	11.0103	11.3453	11.2582	11.2672	11.2026	11.4277	10.9561	11.5373	11.8237	10.9186	11.233	11.9297	11.7934	11.3026	11.0552	10.9358	11.1759	11.3187	11.5159	11.3785	11.1643	11.6322	11.6504	11.2751	11.2518	12.2238	11.3079	11.539	12.1512	11.2902	12.0564	12.3652	11.8259	11.9502	12.2456	11.5557	11.6655	12.3868	10.6333
TCPG_HUMAN	P49368	T-complex protein 1 subunit gamma	5	5	0.966261	-0.0286825	0.988284	-0.0163954	0	0	14.4426	14.2731	13.2368	12.7851	13.8587	13.4399	12.1881	14.5572	14.0391	13.9093	15.2975	13.393	14.6443	13.0754	14.4053	13.7934	14.0614	14.0325	13.2162	13.8577	13.1648	13.9836	12.8844	13.6162	14.0835	14.4538	14.3324	13.527	15.2012	12.9288	13.4527	13.8756	13.2775	13.512	13.778	13.0515	13.6364	13.6233	13.6968
CRBG3_HUMAN	Q68DQ2	Beta/gamma crystallin domain-containing protein 3	2	2	0.58752	-0.13342	0.990361	-0.0159464	0	0		10.9114																												11.5709					11.4142		11.7425
CREL1_HUMAN	Q96HD1	Cysteine-rich with EGF-like domain protein 1	3	3	0.555976	0.273288	0.996765	-0.0146714	0	0										12.6677				13.0895			13.345	12.4433	12.6161	12.6727														13.0968
AHSA1_HUMAN	O95433	Activator of 90 kDa heat shock protein ATPase homolog 1	2	2	0.428744	0.321732	0.997614	-0.0144689	0	0	10.3407		8.49626			10.5302									9.74509	8.97267						10.2591	10.0804				9.83673									9.93493
PGM1_HUMAN	Q96J40	Phosphoglucomutase-1	9	9	0.911913	0.0241956	0.969892	-0.0134613	0	0	11.3065	11.4067	11.3245	11.5773	11.2921	11.586	11.7099	11.4873	11.3165	11.3076	11.2717	11.3853	11.1101	11.5634	11.6669	12.9623	12.4099	11.5735	11.8613	11.1679	11.5985	11.6917	11.6646	11.3481	11.8421	11.8564	11.3556	11.4379	11.2737	11.793	11.6756	12.1224	11.7063	11.6545	12.175	11.315	11.331	11.8266	11.4456
RARR2_HUMAN	Q99969	Retinoic acid receptor responder protein 2	4	4	0.999575	0.00261612	0.988236	-0.0132557	0	0	11.6724	12.8502	12.7122	13.1288	12.2657	12.6982	11.4745	12.9272	12.7515	12.2596	13.3371	12.8785	12.9591	12.5869	12.0476	13.9981	12.6441	12.0498	12.2999	12.6849	12.148	12.8343	11.5869	13.2362	12.8254	12.3976	11.215	13.2839	13.3025	13.0028	12.652	12.6457	12.4662	12.7512		13.1014	13.3677	13.6159	12.3763
MIF_HUMAN	P14174	Macrophage migration inhibitory factor	4	4	0.021291	-0.276224	0.993337	-0.0131642	--	0	13.4882	12.1681	11.9646	11.7119	13.2713	13.233		10.7917	12.1163	11.6742	11.8443	12.6706	11.9872		11.2556	11.6774	11.7911	11.447		11.5874	11.3039	12.8108	12.9987	11.8991	11.5668	12.259	12.0576	12.2552		12.964		12.516	12.1593	11.3231	13.1289	13.3365			12.1128
PTPRJ_HUMAN	Q12913	Receptor-type tyrosine-protein phosphatase eta	9	9	0.343496	0.0999738	0.982099	-0.0123403	0	0	12.1395	12.1016	12.2389	11.8147	11.7984	12.0417	11.1023	11.3454	11.8289	11.6453	11.7119	12.4473	11.3114	12.2815	12.3163	12.3706	12.3908	11.8656	11.9425	12.3182	12.445	13.1064	10.9011	11.8751	12.3299	11.7077	11.6562	12.5584	11.8802	12.1636	12.9852	12.1277	12.1364	11.9286	13.0968	12.0275	11.5105	12.2995	12.0528
ISM2_HUMAN	Q8N501	Isthmin-2	9	9	0.755599	-0.11333	0.996446	-0.0123391	0	0	13.5296	15.14	12.5745	15.5701	15.328	15.3207	14.2277	13.0441	14.7874	14.9675	14.2692	16.1562		15.197	15.2867	14.5084	14.7163	12.4556	14.6337	14.2472	13.7424	14.9998	15.5254	14.921	15.2722	15.3779	15.6434	14.6167	15.2324	15.3088	15.3643	16.6297	15.7016	13.7226		14.352	15.7843	15.4423	15.6519
QSOX1_HUMAN	O00391	Sulfhydryl oxidase 1	30	30	0.766131	0.0361731	0.967884	-0.0122767	0	0	12.2792	13.0009	12.7693	12.9599	12.4606	12.6975	12.314	12.9016	12.8046	12.4321	13.097	13.0854	13.0803	13.1104	12.6945	13.1471	13.0453	12.7377	12.9374	13.6868	12.3005	13.0765	12.5535	13.1884	13.0635	13.2366	13.0013	12.9629	13.3306	12.8509	13.0704	13.1614	13.7818	12.6182	13.248	12.7779	13.0314	13.0431	12.6513
HEG1_HUMAN	Q9ULI3	Protein HEG homolog 1	6	6	0.00949178	-0.661902	0.997612	-0.012036	-	0					12.5427	13.7333				13.4983	13.5831		12.9301		12.773	13.2134	12.6065	14.5095	13.8205	13.537	13.1631				13.6039	13.4566	12.6577		13.7182	13.2319		12.8901	13.4901	13.9974		10.9571	13.5654		13.5058
PLMN_HUMAN	P00747	Plasminogen	144	123	0.828975	0.0259881	0.958377	-0.0120266	0	0	19.1868	19.3239	18.9792	18.6193	18.7706	19.1246	19.0687	19.0279	19.2377	18.8793	19.38	19.1273	19.3645	19.0615	19.111	19.1189	19.0686	19.2392	19.1936	18.9033	19.2453	19.2411	18.9231	19.167	19.3398	19.3473	19.2738	18.954	19.1306	19.6187	19.3009	19.1528	19.3563	19.4306	19.5481	18.5596	19.1606	19.2786	19.071
NRP1_HUMAN	O14786	Neuropilin-1	10	10	0.996293	0.0100947	0.993018	-0.0120236	0	0	10.8796			10.8148		12.3779		11.079	11.2823	10.7666	11.2352	11.4019		11.5211	11.2949	11.678	12.351	10.4574		11.1344			10.6625	10.9017	10.757		10.3935		10.4999	10.9037		12.7982	11.3986	11.3772		11.5608	10.9617	12.2121	10.7412
PAI2_HUMAN	P05120	Plasminogen activator inhibitor 2	9	8	0.32151	0.261794	0.997198	-0.0118525	0	0	10.4723					10.433		10.386	10.8417		11.5761			10.1737	10.0545					10.4344	10.1058		10.2003				10.1278				12.0653			11.3844		10.616	10.7288
PTGDS_HUMAN	P41222	Prostaglandin-H2 D-isomerase	13	13	0.176255	-0.194477	0.993067	-0.0116926	0	0	10.2923	10.1545	10.1985	10.4515	10.4445	10.6335	10.1941	10.2126	9.85615	11.3888	10.6661	10.339	10.1726	10.7279	10.8753		10.553	10.4306	10.1032	10.958	10.4415	10.4763	10.4089	9.856	10.1616	10.3526	10.1673	10.4687	10.2348	9.82764	10.1518	10.2178	10.2973	10.5314	10.3502	9.77338	9.57987		10.5319
SPB10_HUMAN	P48595	Serpin B10	5	5	0.649209	-0.0871788	0.990429	-0.0115245	0	0	9.93453	10.9886	11.0269	10.9887	10.8387	11.3123	10.757		10.4961	11.3384	10.5298	10.9555		11.1768	11.4064		10.3036	11.142	11.2576	11.378	10.9253	10.9645					10.6898	11.2436	10.5028	10.5199		11.7678	10.0561	10.0806	11.1831	11.0816			10.436
S10AC_HUMAN	P80511	Protein S100-A12	7	7	0.894159	-0.0523971	0.99492	-0.0108782	0	0	13.4806	13.0535	12.6813	13.0935	12.6404	12.8952	12.5263	12.6301	13.3284	13.1295	12.0932	12.8321	12.7562	13.0555	12.8983	12.1538	12.9454	12.3439	12.9158	12.7113	12.8161	12.1693	13.2148	12.7905	13.2069	13.9046	12.8244	12.0616	12.2198	13.1697	12.7154	13.9227	13.7088	12.5453	12.7694	12.321	13.1267	12.8227	12.7802
HUWE1_HUMAN	Q9NSL6	E3 ubiquitin-protein ligase HUWE1	2	2	0.965608	0.0591068	0.999048	-0.0106871	0	0	12.4717										12.2023	12.6731												12.5323		12.4425					13.0965
PLXB2_HUMAN	O15031	Plexin-B2	4	4	0.973686	0.0706912	0.0215076	-0.0104507	0	--										10.5717					10.5912						10.4073		10.7405				10.5465						11.1641
CADM1_HUMAN	Q8N2F4	Cell adhesion molecule 1	3	3	0.538634	0.0669307	0.987135	-0.00928818	0	0	14.0736	13.8171	13.5468	13.87	13.9855	13.8132	13.3193	14.0846	13.8831	14.3939	13.8347	14.2981	14.7009	13.292	13.9591	14.2504	13.5438	14.2745	14.2992	13.7197	13.6951	13.7991	14.1196	13.6864	13.9739	13.3841	13.7598	13.7009	13.8338	13.8382	14.3093	14.0899	13.8858	13.6945	13.8175	14.1348	13.7062	14.0913	13.7344
SYUA_HUMAN	P37840	Alpha-synuclein	3	2	0.0343955	-0.239143	0.99909	-0.00903894	++	0		10.8661																		10.9691		10.3873												11.0686				10.1173
PNPH_HUMAN	P00491	Purine nucleoside phosphorylase	12	12	0.999925	-0.000751228	0.990113	-0.00845582	0	0	12.7252	12.8219	12.5758	12.4183	12.4038	12.4951	12.0492	12.5436	12.691	12.4101	11.4832	12.5818	12.6045	12.5141	12.6255	12.8615	12.5143	12.3617	12.6091	12.1572	12.5328	12.5863	12.0944	12.2567	12.5932	12.5824	12.5893	13.2046	12.9005	12.7521	12.5434	12.9749	12.6496	12.4651	12.9656	12.8701	12.9967	12.7943	12.5954
APMAP_HUMAN	Q9HDC9	Adipocyte plasma membrane-associated protein	3	3	0.709974	-0.109267	0.997781	-0.00838353	0	0			11.6514	11.297		12.2226	11.5075				12.4446		11.2941	12.2553	11.0895		12.1939	11.0689	11.5801	13.4804		11.4938		11.3368		11.6073			11.9524	11.3662		12.6815				11.444			11.7567
LMNA_HUMAN	Q96JA2	Prelamin-A/C	2	2	0.688351	0.0824567	0.997334	-0.00678378	0	0	12.7583	12.5498	12.4019	12.3055	12.5147	12.1139	11.6741	13.3804	13.5567	12.5751	10.9962	12.7754	12.6311	13.301	11.9804	13.3739	12.3792	12.229	12.2263	11.8967	12.0049	12.8129	11.684	13.1663	12.2344	12.8883	11.4563	12.9375	13.3933	13.0736	13.1968	12.7255	12.9065	13.7798	12.7248	12.6833	11.5911	12.7029	12.6489
CFAI_HUMAN	P05156	Complement factor I	64	63	0.779088	-0.0252357	0.981543	-0.0066841	0	0	13.7594	13.6459	13.4229	13.4419	13.5398	13.5915	13.5546	13.417	13.7781	13.6397	13.7134	13.5535	13.6707	13.3554	13.6377	13.8561	12.5091	13.5819	13.8048	13.5275	13.7109	13.7271	13.5634	13.3386	13.6257	14.0724	13.4153	13.2043	13.7283	13.6295	13.5019	13.5334	13.5947	13.3661	13.2337	13.7801	13.3287	13.7793	13.5471
MRC1_HUMAN	P22897	Macrophage mannose receptor 1	27	27	0.732411	-0.0376613	0.993246	-0.00537533	0	0	12.3489	12.5367	12.3202	12.6453	12.1374	12.3147	12.0407	11.9902	12.2573	12.0755	12.2156	12.2898	12.3431	12.5961	12.286	12.4458	12.5298	12.2832	12.01	12.396	11.8382	12.6455	12.4562	12.3441	12.4381	12.4923	11.9893	12.0406	12.0293	12.6637	12.7753	12.4418	12.9853	12.5844	12.9182	12.1933	12.1243	12.4737	12.1646
LAMA2_HUMAN	P24043	Laminin subunit alpha-2	14	14	0.389858	-0.175429	0.999019	-0.00527982	0	0	13.9071	14.1561		13.7534	13.7952	13.5056		12.4255	13.6057	14.143		13.4419	12.0905	13.5224	14.3183	13.1896	13.2646	14.0286	13.7321	13.7702	13.1352	13.4762	14.1053	12.7133	13.7953	13.6348	13.6292	13.3892	13.2233	13.6653	13.613	15.0609	14.3385	13.0203	12.9521		13.4198	13.8949	14.1922
PDLI1_HUMAN	O00151	PDZ and LIM domain protein 1	10	10	0.93386	-0.0903601	0.999824	-0.00390992	0	0	11.357			11.0163		10.8713	10.462		10.7242						10.4061		16.2686					11.3745	10.5695		11.0776										10.9644	11.0118	11.6868	10.9115
PYGL_HUMAN	Q641R5	Glycogen phosphorylase, liver form	14	13	0.68029	0.0695601	0.999033	-0.00336428	0	0	12.3564	12.7321	12.0053	12.6498	12.8402	12.446	12.372	12.7709	12.7645	12.4466	13.2406	13.0288	12.595	12.5628	12.7573	12.825	12.6952	12.2177	12.6196	12.7769	12.9164	13.3779	12.7453	12.5444	12.9888	13.4498	12.2151	13.2958	13.2017	12.5907	12.4973	12.9689	13.0527	12.8326	13.032	12.5087	12.5762	14.1547	12.6806
THBG_HUMAN	P05543	Thyroxine-binding globulin	39	38	0.951403	0.0142725	0.998223	-0.00262825	0	0	17.5759	17.4479	17.3001	17.4463	17.3109	17.4831	17.4854	17.3296	17.6486	17.4652	17.7181	17.7338	17.773	17.4097	17.8728	17.8374	17.7426	17.337	17.8341	17.8168	17.2493	17.3698	17.8851	17.7184	17.7219	18.0722	17.3244	17.7865	17.8071	17.8927	18.3384	17.6057	17.346	17.3886	17.3591	17.9752	17.6723	17.7944	17.2409
DIAC_HUMAN	Q01459	Di-N-acetylchitobiase	11	11	0.558008	0.0816263	0.999537	-0.00220754	0	0	14.5486	15.163	14.8775	14.0507	14.9586	15.1225	13.4444	15.783	15.1696	14.672	14.9436	15.0531	15.1577	14.9807	14.8709	15.5699	15.3347	14.8387	14.7138	14.8615	14.5938	15.4684	13.7997	15.4596	14.8335	15.4012	13.718	14.9803	15.4582	15.0849	15.3779	15.5198	15.1409	14.8328	15.0998	14.7413	15.1385	15.0562	14.8846
ILK_HUMAN	Q13418	Integrin-linked protein kinase	9	9	0.789506	0.0454022	0.999492	-0.00200563	0	0	11.4339	12.0076	11.9238	11.342	11.7118	11.7616	10.0583	11.6797	11.7775	11.4888	11.9249	11.8294	11.7821	12.0178	11.527	12.5592	11.9403	10.943	11.5761	11.5017	11.5864	11.4763	11.3033	11.7862	11.6186	11.4138	10.767	11.8385	11.8647	12.0967	11.6608	12.106	11.5893	11.624	12.0998	11.9398	11.9315	11.7765	11.677
KCRM_HUMAN	P06732	Creatine kinase M-type	10	8	0.956387	0.0175747	0.999468	-0.00183023	0	0	10.7572	11.5853	11.4009	11.5641	11.2028	11.3319	10.8285	11.5092	11.6194	11.0185	11.1948	11.5741		11.0787	11.0315	11.4465	11.3966	11.0627	11.1624	11.1005	11.0397	11.5649		11.4296	11.6195	11.5677	11.025	11.3986	11.738	11.6628	11.6576	11.8923	11.5593	11.6849	11.573	11.3531	11.6621	11.4453	11.536
FETA_HUMAN	P02771	Alpha-fetoprotein	3	3	0.3983	-0.112592	0.99981	-0.00162414	0	0			13.9612	14.1949	13.9281	13.6395	13.5918	13.073			13.6159	13.7083	13.2073	14.0954	14.1054	13.7924		13.5273	13.3738	13.6622	12.6286		13.8074	13.6954	13.9025			13.8121	13.9857	13.8926	13.7304			13.3326	13.1706	12.988	13.9546	14.316
SDPR_HUMAN	O95810	Serum deprivation-response protein	10	9	0.990676	-0.00797263	0.999695	-0.00139064	0	0	11.4113	11.3689	11.5014	11.1407	11.0981	11.3958	10.3684	10.8928	11.6038	11.7248	12.012	11.3063	11.7356	11.4737	11.0151	11.2154	11.4458	11.5582	11.4017	11.0461	10.6961	11.3269	11.309	11.3084	11.4744	11.8145	11.0587	11.159	11.6716	11.5638	11.6097	11.5805	11.5921	11.5931	11.3938	11.0733	11.4302	11.6709	11.3331
PLST_HUMAN	P13797	Plastin-3	7	1	0.0227239	-0.297208	0.99998	-0.000619838	-	0	17.5208	17.3702	18.0477	16.974	17.3426	17.208	16.4549	17.3874	17.8692	17.0264	16.7554	17.1064	16.6434	16.9501	17.0131	16.9353	16.5126	17.5424	17.3577	16.5031	16.8965	16.6982	17.3004	16.8289	17.4566	18.135	17.1025	16.8413	17.822	17.3139	17.2535	17.8849	17.2999	16.5571	16.5683	15.9472	17.3315	17.4692	17.4537
MARCO_HUMAN	Q9UEW3	Macrophage receptor MARCO	3	3	0.698442	-0.286123	0.999998	-0.000552392	0	0			16.567		17.1588					17.7043		16.6559	16.9322		16.781			17.8159	17.3499		17.0473			10.1552	17.5362	18.3849		17.5376	18.9247			16.6934			16.7654	17.3456	16.2122
FA7_HUMAN	P08709	Coagulation factor VII	9	9	0.118435	-0.122514	0.00173277	-0.000180838	0	--	11.3306	11.1847	11.3382	11.4168	11.2826	11.2435	11.0173	11.3485	11.6946	10.8494	10.9203	11.3708		11.571	11.6159	11.3054	11.4513	11.8357	11.6677	11.803	11.5708	11.6966	11.285	11.7264	11.8914	11.642	12.1033	11.3539		11.4147	11.2011	12.022	11.8399	11.7819			11.1402	11.7492	11.313
FA11_HUMAN	P03951	Coagulation factor XI	36	33	0.948195	0.0148687	0.999995	-0.000143111	0	0	13.1406	13.0522	12.9907	12.7381	13.2331	12.8635	12.6956	12.9281	13.3453	13.0417	13.1509	12.9258	12.8583	12.7997	12.9656	13.1154	13.042	13.2359	13.0142	13.0685	13.2208	12.8235	13.0335	12.5884	13.085	13.1083	12.5143	12.9353	13.2924	13.2113	12.8377	12.8784	12.8625	13.1448	12.9986	13.144	13.1175	13.1424	12.9308
HXK3_HUMAN	P52790	Hexokinase-3	8	6	0.448407	-0.133869	1	3.31e-06	0	0		11.0708	10.7491	10.816	10.7176	10.912	10.8313			10.7638	11.135					10.9101		10.748		11.3687	10.596			10.439				10.4423	10.6533	10.8309	10.9117	11.1183	10.5909	12.1381		10.635
FBLN1_HUMAN	Q9UC21	Fibulin-1	45	45	0.965317	0.0283283	0.999999	0.00014405	0	0	16.2833	16.0376	16.2787	16.8144	14.976	15.8283	15.3269	15.8324	15.0781	15.2043	15.6061	15.4501	15.5589	15.7496	15.6949	15.5742	14.2862	15.9593	15.4887	15.3703	16.7101	17.2652	15.5596	15.4311	16.7518	15.4371	17.0081	16.344	15.1687	15.9536	16.1352	15.6575	16.3763	15.0388	16.4684	17.8011	15.2324	16.2848	15.8177
COMP_HUMAN	P49747	Cartilage oligomeric matrix protein	22	18	0.963461	0.0175425	0.99998	0.000394948	0	0	14.0854	13.9626	13.696	13.6806	13.5804	14.1922	13.7387	13.4802	13.4525	13.8458	14.1764	13.9491	15.6767	14.1552	14.07	14.1818	13.7762	14.2134	14.6699	14.1277	14.4587	13.9204	13.7234	13.7461	14.3853	14.6928	13.1973	14.5305	14.2284	13.5256	14.1101	14.2282	13.8583	14.0102	13.9271	13.697	14.2319	14.1399	13.4643
CNDP1_HUMAN	Q96KN2	Beta-Ala-His dipeptidase	36	35	0.999914	-0.00151019	0.999984	0.000635181	0	0	12.6229	13.3399	13.3757	12.1965	13.4085	13.2978	12.0353	12.6233	13.5364	13.1689	13.7481	13.9314	11.9432	13.1157	14.0558	13.5642	14.1136	13.9722	13.5501	13.0337	13.5641	14.2914	14.2638	11.123	13.8201	12.9856	14.1596	13.3487	13.1583	13.1545	13.3321	13.2321	13.1818	13.4627	11.8989	12.7083	12.6719	13.2281	13.7753
PPM1B_HUMAN	O75688	Protein phosphatase 1B	2	1	0.999248	0.00457049	0.999967	0.000897036	0	0	11.8406	12.0312	12.2722	11.8833	12.3076		10.7402	11.9227	12.236	12.1765			11.265	11.6989	11.1989	12.096	11.9562	13.2946					10.7575	11.956	11.3226			12.0011		12.3142	11.5862		11.4703	12.2669		12.8247	12.188	11.929	11.9661
PDIA1_HUMAN	P07237	Protein disulfide-isomerase	13	13	0.630637	-0.0430381	0.999677	0.00109738	0	0	12.1207	12.0249	11.9578	11.3936	11.9481	12.6034	11.7044	12.2993	12.1096	11.8838	12.1948	12.2876	11.9733	11.616	12.2393	12.1213	12.3895	11.8053	12.1113	12.3745	11.9202	11.5955	12.1881	12.2985	11.5744	12.3809	12.0346	12.1697	12.139	12.3441	12.1084	12.7	11.9502	11.8219	12.2931	11.9239	12.2445	11.9181	12.0195
C1QB_HUMAN	P02746	Complement C1q subcomponent subunit B	25	25	0.998819	0.0025596	0.999512	0.00160549	0	0	16.9215	16.902	16.6561	16.6867	16.914	17.2499	16.8118	16.6993	16.7577	16.5025	16.8386	16.6396	17.3762	16.9916	17.05	17.1482	16.6376	16.7968	16.9198	17.1585	16.9481	17.076	17.012	16.8885	17.0466	16.758	16.8206	16.5235	16.9386	16.873	16.8504	17.2109	16.7539	16.4317	17.0497	16.7838	16.6653	17.0998	16.7943
HPHL1_HUMAN	Q6MZM0	Hephaestin-like protein 1	3	1	0.992621	-0.00773614	0.999624	0.00170021	0	0	18.2042	18.1036	18.2556	18.1147	18.3244	17.9112	18.0405	17.9752	18.5106	18.4281	19.1588	18.6272	18.4665	17.7607	17.7706	18.4046	18.3943	18.4541	18.5758	17.872	18.1858	18.4622	18.0542	18.4288	18.3532	19.0898	17.8839	18.4609	19.0479	18.7195	18.4451	18.4937	18.498	18.4484	18.8475	18.7855	18.8239	18.9476	18.0223
PDIA5_HUMAN	Q14554	Protein disulfide-isomerase A5	3	3	0.0343955	-0.0223836	0.999562	0.00194656	--	0	11.2465	11.1767	11.2907	10.3268	11.3516	11.1105	11.0129	10.4639	11.1327	11.4898	11.191			10.9592	12.0199		10.8672	11.3422	11.438	11.6549	11.1943	10.9459	11.7678	11.2547	11.5102		11.0428	11.0276	11.2269	11.1729		11.8939	11.6944	10.7876	10.8621	11.3275	10.8017	11.1689	11.8986
RYR2_HUMAN	Q92736	Ryanodine receptor 2	3	1	0.0233359	0.72887	0.999999	0.00203529	++	0														12.9585
KAD2_HUMAN	Q8TCY3	Adenylate kinase 2, mitochondrial	7	7	0.289507	0.13142	0.999637	0.00212582	0	0	14.3709	15.0759	14.0017	13.9446	14.6897	14.8534	15.9367	14.3467	14.519	13.3611	14.8166	14.8353	14.8621	15.5176	14.6637	13.9402	15.3519	14.9042	13.7403	15.0853	14.5549	15.4133	14.366	14.194	14.8192	15.3588	14.1395	14.5421	14.5951	14.5417	14.9934	15.4759	15.237	14.561	15.2661	14.2448	14.1811	14.555	14.4248
IGHG2_HUMAN	P01859	Ig gamma-2 chain C region	7	1	0.0176087	-0.270454	0.999663	0.00219878	-	0	14.085	13.1971		13.0831	12.8909	13.1367	12.8105	11.7177	12.6619	12.11	12.7561	13.0915	13.4217	11.8494	12.3219	12.7538	12.8468	12.2927	11.4113	11.5097	12.9618	13.3272	12.7322	12.4931	13.093	12.9986	12.614	12.8609	12.49	13.7371	11.9813	12.8614	13.1272	10.6236	12.8098	12.9205	12.0028	12.1369	12.647
ATF6B_HUMAN	Q9H3V9	Cyclic AMP-dependent transcription factor ATF-6 beta	2	2	0.0799627	0.187476	0.999517	0.00237515	0	0	13.0369	13.337	12.9337	12.714	13.0423	13.2523	12.5809	13.611	13.2302	13.4995	13.2626	13.7629	13.11	13.5563	13.855	13.558	13.4626	13.9685	13.6187	14.3562	13.8755	13.5791	12.1807	13.3092	13.8282	13.748	12.3125	13.6279	13.6421	13.3857	13.7742	13.6271	13.4627	13.7012	13.19	12.4716	13.9252	13.5991	13.642
CSPP1_HUMAN	Q1MSJ5	Centrosome and spindle pole-associated protein 1	2	2	0.46221	0.259584	0.00926546	0.00245002	0	--				10.3684		10.627		10.1292			11.4566			10.8562														11.2421	11.2582
PCP_HUMAN	P42785	Lysosomal Pro-X carboxypeptidase	5	5	0.885829	-0.031439	0.999143	0.00259231	0	0	13.4425		12.6496	13.2382	12.9305	13.0996	12.4294	12.8048	12.6363	12.28	12.6776	13.4948	12.8587	13.6097	13.219	13.1673	13.2086	12.83	12.8272	12.9554	13.0769	11.6007	12.8382	12.8641	13.0147	12.9644	13.1687	13.1252	12.9919		13.062	13.4257	12.4035	13.1457	13.2724	12.1871	12.6683	13.3766	12.9943
NCAM2_HUMAN	O15394	Neural cell adhesion molecule 2	6	6	0.757313	0.0573601	0.998906	0.0034675	0	0	10.3417	10.4655	10.2781	10.1007	12.6059	10.6119	10.7097	10.5772	10.5896		10.6202	10.5887			12.6891	10.6832	10.6748		10.7763	11.2002	9.7567	10.8024	11.0236	10.5238		10.8176	10.6314	10.6852	10.5668	10.6928		11.2932	10.579	10.6331	11.3176	10.2131	10.6159	10.468	10.6819
A1AT_HUMAN	Q86U18	Alpha-1-antitrypsin	42	38	0.779138	0.0951638	0.999561	0.00383142	0	0	12.2886	12.3319	11.5901	11.5507	12.2757	11.9306	12.1315	11.4636	12.3545	11.8862	11.1861	11.5666	11.9756	11.2302	11.615	12.5273	11.8737	11.3954	12.1256	11.9423	11.51	12.0494	11.5207	11.4671	12.223	15.9822	12.0105	11.9011	12.6653	11.3828	11.5624	11.9966	11.7675	11.162	12.1345	11.9577	11.9982	12.0343	11.6714
RN123_HUMAN	Q9H5L8	E3 ubiquitin-protein ligase RNF123	3	2	0.807124	0.0439512	0.998139	0.00397523	0	0	19.1421	18.8696	18.4439	18.6557	18.7464	18.5531	18.422	18.849	19.4044	19.2347	19.268	19.3031	19.298	18.7543	18.5345	19.0522	18.983	19.3209	19.6043	18.8484	19.2641	18.2249	18.8711	19.3943	19.1043	19.6802	18.388	19.1763	19.5345	19.3741	19.3358	19.5272	19.3854	19.5843	19.2545	18.8184	19.4871	19.6355	18.8309
PGFRB_HUMAN	P09619	Platelet-derived growth factor receptor beta	3	3	0.686047	0.0611463	0.998067	0.00423089	0	0	10.7602	11.9458	11.6105	10.9393	11.1744	11.6386	9.82853	11.5418	11.8361	11.3519	11.0507	11.6756		11.6098	11.8876	11.8518	11.2302	11.9399	11.9885	12.1641	12.0299	12.118	10.4436	11.1809	12.1805	11.8039	10.7057	11.8009	11.8708	11.9863	11.4976	11.8289	12.0216	11.3973	12.001	11.5692	11.7274	11.5388	11.8549
PTPRK_HUMAN	Q15262	Receptor-type tyrosine-protein phosphatase kappa	3	3	0.00576825	-0.0333826	0.997856	0.00491773	--	0	11.0113	11.0814	11.4671	11.3202	11.7025	11.5147	11.8875	10.7544	11.3944	12.0466				11.6252	11.5138	12.2141		11.9429	11.3797	10.81	11.1723	11.7015		10.9744	11.8737	12.7085	11.0551	11.2534	11.2728	11.4388		12.1055	11.5143	11.45	11.4962	11.8965	11.1098	11.0569	11.519
ANXA2_HUMAN	P07355	Annexin A2	5	1	0.983346	-0.0150309	0.998099	0.00511044	0	0	10.0458	10.9449	10.6465		10.2727	10.4616		10.1852	10.3676	9.69909		9.6505			10.1294	10.1259	10.8047	10.3259		10.3499	10.2075			10.2805		10.4485		10.2593	10.0511		10.2501	11.0323	10.8685	11.134			10.1281	10.3979	10.5592
SNAA_HUMAN	P54920	Alpha-soluble NSF attachment protein	3	3	0.994618	0.0101339	0.0307123	0.00554704	0	--	10.2623					10.2326	10.2966	9.5691	10.0969	10.5097	10.187			10.8043	10.7594		9.96807	10.8406	10.5	10.2125	10.5592		10.3193				10.5521									10.1845	10.1979
TPM3_HUMAN	Q9NQH8	Tropomyosin alpha-3 chain	17	5	0.411919	-0.114596	0.997451	0.00574496	0	0	11.5804	11.1963	11.2877	10.3255	12.5024	11.2417		11.6038	10.4836	10.8576	11.013	10.9235	11.7188	10.8141	10.5879	11.6147	11.1056		11.4586	10.9747	11.2296	11.9807	11.2149	10.8079			10.9238	11.5316	11.4486	11.146	11.2306	11.6641	11.1875	11.9599	11.1651	10.9054	11.1556	11.5586	11.1296
TLN2_HUMAN	Q9Y4G6	Talin-2	11	1	0.99137	0.0167824	0.998443	0.00705065	0	0	12.6917	12.3618	12.4267	12.2789		12.5367	11.5816	15.0433	13.0042		12.8629	12.3418	12.9163	11.8443	16.6424	13.4385		12.7173		11.8994	14.2771	12.7688	12.4658	12.4473	12.8026			11.8617	13.1762	12.2035	12.4062	12.6382	12.3696	12.9442	12.2542	12.4062	12.9622	12.9132	11.9189
NEO1_HUMAN	Q92859	Neogenin	2	2	0.505963	0.107844	0.997031	0.0070539	0	0	9.64447	11.2612	12.1574	11.4411	11.0441	11.2489	10.5889	11.0445	11.0205	11.267	12.293	11.5157	11.1633	11.1782	10.8386	12.6461	11.668	10.4114	11.1423	11.1357	11.1714	11.705		11.4028	11.4448	10.9466	9.99968	11.8552	11.6375	11.4359	11.6313	10.9914	10.7364	10.879	11.7725	11.7927	11.4997	11.4415	11.1162
RHBT1_HUMAN	O94844	Rho-related BTB domain-containing protein 1	2	2	0.58959	-0.126369	0.997636	0.00744353	0	0	9.97089		10.3087	10.3609		11.0601		10.6981	9.73457	9.45607							10.0386			10.4058		10.4595	10.3015	10.0547			10.4212	10.5403	10.2153	9.99863		10.8807	10.4578	9.7722			10.468
C1QC_HUMAN	P02747	Complement C1q subcomponent subunit C	10	10	0.809093	0.0344836	0.989526	0.00746009	0	0	18.2783	18.0208	17.6193	17.6621	18.011	18.16	17.7468	17.9857	17.9696	17.2601	17.7311	17.724	18.4702	18.1285	17.7546	18.4313	17.821	17.8209	17.966	17.9845	17.7654	18.0554	17.9269	17.9144	18.1275	17.7829	17.8748	17.7796	18.1662	17.9134	18.2047	18.1945	17.7315	17.685	18.1856	17.6932	17.9743	18.2019	17.8067
EF1B_HUMAN	P24534	Elongation factor 1-beta	2	2	0.339675	-0.0951747	0.992219	0.00747416	0	0	12.1129	11.9325	12.0719	12.1782	11.9826	11.846	11.787	11.324	11.6824	11.5175	12.0303	11.2088		11.6554	11.2761	12.3821	11.3474	11.1725	11.3329	12.0281	11.6334	12.0706	11.6162	11.9443	11.1912	11.3267	11.2654	11.7776	11.8588	11.9863	11.2948	11.7647	11.638	11.3216	11.1356	12.1578	11.7997		11.5192
PLXA1_HUMAN	Q9UIW2	Plexin-A1	2	1	0.989223	0.0233172	0.998818	0.00752713	0	0		12.2177	12.4936	10.9642		12.1686		11.858	11.9869		12.3468	11.4146	11.4837						11.1771	12.569		11.9891		11.5132		12.4968	11.8039					11.5889	12.1767		11.9582	11.1949	11.4341		11.9296
TSP3_HUMAN	P49746	Thrombospondin-3	3	1	0.708754	0.202224	0.998976	0.00951618	0	0											10.2862			11.2607										11.3829									11.1054	10.2634
ASM3A_HUMAN	Q92484	Acid sphingomyelinase-like phosphodiesterase 3a	5	5	0.854434	0.0366096	0.987871	0.00963434	0	0	12.2565	11.912	11.8684	11.8486	11.8004	12.3773	11.1931	12.0655	12.1693	12.3592	11.4638	12.134	11.4402	11.6108	11.8841	12.2242		11.1754	11.7114	11.624	11.4412	11.798	11.8095	11.5582	11.6587	12.4263	11.2647	11.4128	12.352	12.224	11.9552	12.0482	11.895	11.7424	12.5478	12.448	12.324	11.9132	12.0724
PSB8_HUMAN	P28062	Proteasome subunit beta type-8	3	3	0.0383871	0.417273	0.997558	0.0100575	+	0	11.0681	12.5249			11.3647	10.5452		11.6494		11.6016	12.3225	11.152	10.9756	11.2544	11.1391		11.6989	11.1655	13.2061	11.6444	10.9768		12.5514	12.5096		12.4497	11.6286	12.0117	11.8261	12.0564			14.0859	11.7021	12.1058			11.2363
LDLR_HUMAN	Q53ZD9	Low-density lipoprotein receptor	7	7	0.322646	0.105331	0.986451	0.0109647	0	0	10.9401	11.6843	12.5135	12.208	11.8109	12.036	11.7191	12.2992	11.8308	12.1361	12.3763	12.4592	12.8364	12.7247	11.9899	13.1689	12.5135	11.6871	12.1489	12.5513	11.1311	12.3036	11.8422	12.2049	12.3566	11.7248	11.7873	11.9654	12.0692	12.2257	12.5259	11.6582	12.3287	11.8715	12.0068	12.3899	12.4718	12.3503	11.9067
TALDO_HUMAN	P37837	Transaldolase	10	10	0.794853	-0.315208	0.99974	0.0113629	0	0			11.6509	11.7879																				9.90464									11.2093				10.3075
TGM2_HUMAN	P21980	Protein-glutamine gamma-glutamyltransferase 2	2	2	0.717221	0.095547	0.995683	0.0114748	0	0	12.2475	12.2231	11.9179							11.3673	12.8062							12.9967			12.0219		12.2343	12.2893		12.9117	12.2033			12.7358					12.681		11.9917		11.799
DSC2_HUMAN	Q02487	Desmocollin-2	4	4	0.593169	0.160256	0.0313158	0.0117207	0	--		12.0879			11.5851			9.76196	10.4808		11.0086		10.7394	10.5389				11.5146		11.1164	10.4786	10.8319								11.3335				12.1285		10.8171
LCP2_HUMAN	Q13094	Lymphocyte cytosolic protein 2	2	1	0.612651	0.426366	0.999456	0.012327	0	0						16.671																16.3244
NOTC2_HUMAN	Q04721	Neurogenic locus notch homolog protein 2	5	4	0.863246	-0.0566511	0.991431	0.0129833	0	0	12.8319	12.7643	12.447	12.148	12.2443	12.286	12.2777	11.6687		12.134	13.2791	13.0207	12.2346	11.7398	12.9111	13.3498	11.8894	12.2561	11.6631	13.1417	12.7873	12.2717	13.8422	12.8509	12.615	13.4124	12.6235	12.2679	12.9778	13.5654	11.5858	13.185	12.7524	11.7065	12.8851	13.0233	12.402	12.8282	11.8304
CAPG_HUMAN	P40121	Macrophage-capping protein	4	4	0.607017	-0.173981	0.996587	0.0148639	0	0				11.0388								11.9056		11.8629		11.9134		12.4911												11.6919	11.9122
KIF2A_HUMAN	O00139	Kinesin-like protein KIF2A	3	3	0.902013	-0.0302427	0.972334	0.0151929	0	0			10.35			10.2458		10.2489			10.3242				10.3102		10.5353			10.6634	10.1954		10.2994	10.5831									10.4583	10.0508
GDIR1_HUMAN	P52565	Rho GDP-dissociation inhibitor 1	6	6	0.998776	-0.00849551	0.995629	0.0152524	0	0		10.5517	10.1858				10.2781		10.147					10.3483				9.35684	9.82027		10.2333			9.55454		10.6362		11.7496		10.6928			9.93238	10.912		11.9999			10.2871
TFPI1_HUMAN	P10646	Tissue factor pathway inhibitor	4	4	0.911401	-0.036876	0.983392	0.0152596	0	0	12.634	13.608	14.2152	13.0778	13.5005	14.1906	13.1577	12.7633	13.6638	13.952	12.8385	13.6722	13.1451	13.8754	13.5135	13.7887	13.7743	13.7084	13.9794	13.7918	13.7757	14.1502	11.9163	12.9416	13.5006	13.2953	12.9631	12.9684	13.2927	13.7417	13.3255	13.718	12.9872	13.1369	13.921	13.6312	12.7429	13.4304	13.958
FAT2_HUMAN	Q9NYQ8	Protocadherin Fat 2	2	2	0.581945	0.0838644	0.979349	0.0158376	0	0	12.9611	14.3537	14.7178	13.2819	14.5185	13.9547	13.0792	13.3894	14.1655	14.0438	13.1801	14.1629	13.3526	13.9921	14.4295	14.3026	14.5706	13.7586	14.202	13.7292	13.6293	15.2858	12.6418	13.55	14.1649	13.6837	12.835	14.061	13.8472	14.4568	14.2106	13.9608	13.91	14.1225	14.4603	14.2224	13.7639	13.9961	14.163
FA9_HUMAN	P00740	Coagulation factor IX	21	18	0.283797	-0.059519	0.904934	0.0158869	0	0	14.7796	14.6564	14.8235	15.2604	14.6299	14.9998	14.7517	15.1607	15.1098	15.0459	14.5165	14.6011	15.0542	14.6977	14.692	15.1008	14.5328	14.703	15.1776	14.8977	14.7886	14.6137	14.5976	14.5599	14.8309	14.8426	14.5531	14.847	14.2753	14.864	14.6545	14.7275	15.031	15.0587	14.8514	14.8211	14.9469	14.9563	14.8084
CO8B_HUMAN	P07358	Complement component C8 beta chain	51	50	0.939285	0.0147283	0.925935	0.0159437	0	0	17.245	17.3594	17.3454	16.9298	17.1927	17.729	17.1398	17.3131	17.3337	17.551	17.4964	17.6286	17.5677	16.9483	17.3316	17.7573	16.6205	17.3793	17.1503	17.7062	17.5543	17.2981	17.4244	17.1391	17.1194	17.238	17.346	17.3725	17.2983	17.5979	16.9104	17.3241	17.0683	17.7426	17.4776	17.4874	17.4016	17.5368	17.3634
FA8_HUMAN	P00451	Coagulation factor VIII	10	10	0.935766	0.0184376	0.948771	0.0159952	0	0	11.3341	10.884	10.7656	11.1287	10.9628	11.2519	10.3797	11.2666	10.2209	10.8248	11.4273	11.0661	11.0175	11.3489	10.8478	10.7442	11.0406	10.8294	10.9862	11.251	10.7725	10.647	11.2339	10.9089	11.0977		10.6073	10.9861	11.2913	10.813	11.1201	11.2595	10.9326	10.8692	11.1075	11.1378	10.3057	11.191	10.567
CHLE_HUMAN	P06276	Cholinesterase	18	18	0.762917	-0.041053	0.954717	0.0164762	0	0	12.8171	12.7742	13.0043	13.0576	12.3227	12.4934	12.9462	13.5751	12.9366	12.3215	12.7863	13.4378	13.0816	13.2045	13.3207	13.3887	12.74	12.5531	12.6809	13.5915	13.4816	13.1875	13.0041	12.8981	12.5547	12.9239	13.2212	13.2166	13.1448	12.904	13.3935	13.672	12.6393	13.1174	12.695	12.5851	12.5575	13.0804	12.5199
FSTL1_HUMAN	Q12841	Follistatin-related protein 1	6	5	0.915016	-0.0425875	0.983784	0.0166774	0	0	11.8208	10.7503		10.5289	11.0122	10.984		11.0769		11.3244	11.6943	10.9888		11.6208	11.4318		11.7269	10.853	10.9392	10.8782		10.5453	11.6493	11.6101		11.8229	10.9233		11.3517			11.6205	11.4281	11.4742			10.6669
NAR3_HUMAN	Q13508	Ecto-ADP-ribosyltransferase 3	2	2	0.65837	-0.0969434	0.984036	0.0169753	0	0	9.59877					9.84695		9.91456			10.3134			9.90198			9.88651					9.75516		9.78915		10.311	9.55155		10.0677
HCLS1_HUMAN	P14317	Hematopoietic lineage cell-specific protein	3	3	0.00137274	-0.0840814	0.00176078	0.0172446	--	--	11.7556	11.8104	10.8778	11.3524	11.2198	11.5151	10.2991	10.3139	11.8235	11.8234	11.045	11.2791	11.2701	11.0133	11.9316	11.6209	11.6602	11.7802	11.4163	11.3599	11.6484	11.4935	11.7371	11.0506	11.8307	11.7976	11.3513	10.6816	11.3574	11.8496	10.8332	12.4681	12.0953	11.5843	10.9532	11.2963	11.2775	11.8562	11.7327
PPIP2_HUMAN	Q9H939	Proline-serine-threonine phosphatase-interacting protein 2	3	3	0.459323	-0.0902035	0.961635	0.019429	0	0	10.549	10.4172	10.7165	10.995	10.8773		10.8827	10.2316	10.8504	11.2828		11.3193		10.9827	10.8963	11.5457		10.1994	10.736	11.0014	10.2677	10.7275	10.1706	10.6547		10.3354	10.2606	10.8694	10.8261		11.2233	10.8278	10.4964	10.7032	12.1053	11.5636	10.7613	10.7645	10.7192
WRN_HUMAN	Q14191	Werner syndrome ATP-dependent helicase	3	3	0.926559	-0.0454575	0.986394	0.0200426	0	0			12.9567	12.6241		12.7403				12.0774	14.1921	14.6542	14.6773	13.2456			12.9071	13.4886	13.6711	13.7091			13.7257	13.5616				13.5427	13.2796	11.6215	14.5345	13.4451		14.5614	13.1376	13.4304	13.7955	14.2966
HBD_HUMAN	P02042	Hemoglobin subunit delta	24	7	0.473477	0.162942	0.98667	0.0208822	0	0	11.9941	13.1426	12.0776	13.9405	12.1811	15.1265	13.1021	14.9457	13.1532	12.6335	12.7757	13.4339	13.167	13.6543	12.7958	13.2906	16.0513	12.2394	13.5234	12.5286	12.8227	13.0892	11.6898	12.8095	13.3482	13.534	12.3585	12.23	13.0672	13.3798	13.3622	13.1405	12.875	11.7961	13.065	13.1701	11.5132	13.818	14.3952
NRCAM_HUMAN	Q92823	Neuronal cell adhesion molecule	11	11	0.40171	0.0985797	0.954981	0.0209452	0	0	12.2879	12.3074	12.4336	12.1007	10.9963	12.1905	11.8413	12.3004	12.6446	12.0749	12.4888	12.277	11.9428	12.13	12.4101	12.7931	11.9362	12.3058	12.363	12.7742	12.634	12.5687	12.6233	12.4657	12.3499	12.8511	12.1686	12.0454	12.6611	12.4069	12.4759	12.6486	12.4926	12.0029	13.0878	12.2057	11.9299	12.6299	12.0888
TFF3_HUMAN	Q07654	Trefoil factor 3	6	6	0.997475	-0.00811508	0.981635	0.0216261	0	0	13.0396	12.4778	11.9606	12.4551	12.641	12.4022	12.2689	12.2875	13.3663	12.2912	13.0302	13.714		12.5409	13.2202	13.3494	13.3814	12.508	13.4513	12.908	12.2842	13.2473	12.3212	12.3196	12.3322	12.8774	12.6257	12.7143	13.2466	12.6073		13.8015	12.6589	12.7417			12.5906	13.3305	13.0647
UBR4_HUMAN	Q8WV67	E3 ubiquitin-protein ligase UBR4	3	2	0.290772	0.222154	0.984502	0.0238197	0	0	11.9441	12.2292		13.6846	11.9937	12.0441	13.2572	14.7021	12.0244	11.5588		12.1684			12.2175	12.6114	12.1719	11.9936	12.5742	11.8874					12.7761		13.0261				12.5202			11.7179			12.1288
DSG2_HUMAN	Q14126	Desmoglein-2	6	5	0.406499	-0.0724029	0.895701	0.0243993	0	0	14.1167	13.7083	13.9218	14.215	13.8426	14.7999	13.4701	14.601	14.0119	13.9247	14.7322	14.1791	14.3074	14.0872	14.1373	14.1562	13.5696	13.992	14.3337	14.3192	14.1707	13.843	13.9867	14.357	14.1126	14.5208	13.9739	13.7054	14.7453	14.0728	13.9827	14.0189	13.914	14.0359	14.1578	14.4359	14.9382	14.1796	13.6308
AOC1_HUMAN	P19801	Amiloride-sensitive amine oxidase [copper-containing]	18	18	0.936694	-0.0252993	0.930271	0.025954	0	0	11.9184	12.2912	12.4982	12.1554	11.6844	12.9764	12.165	12.5239	12.342	11.8175	11.928	12.178	13.078	12.4939	12.1493	12.4365	12.2179	12.2626	11.9134	12.6782	12.2313	12.0822	11.6791	12.135	12.7093	12.4691	12.0385	12.15	12.1379	12.5271	12.8582	13.2242	12.7825	12.4428	12.5855	11.8602	12.8207	12.1053	12.2373
HSP13_HUMAN	P48723	Heat shock 70 kDa protein 13	4	4	0.913058	-0.0506285	0.974503	0.026064	0	0	14.1684	14.2931	13.6001	13.0274	12.767	13.725	11.9185	15.6397	14.4762	14.9396	14.3807	14.1773	13.6107	14.6917	13.6745	14.0283	13.6969	14.3182	14.2523	13.7221	14.4627	13.095	12.6076	14.487	14.234	15.6676	12.8909	14.5724	15.4051	14.0851	14.5361	13.8347	14.5546	15.6312	16.5138	13.2929	14.6556	13.8576	13.7733
MDHM_HUMAN	P40926	Malate dehydrogenase, mitochondrial	2	2	0.97933	0.0264746	0.98073	0.0260653	0	0		12.2362	12.1144	11.8304	10.9657	11.9183		12.1575	11.8835	11.7472		11.9385		12.4967	12.1156	12.3161	12.1671	11.8378	12.2878	12.0468	12.0326	12.0079		11.531	12.5204	11.9835	10.9875	10.0614	11.319	12.1701	11.8925	12.4064	12.0901	14.7439	11.568	12.1402	11.5798	12.0737	12.4397
PSA_HUMAN	P55786	Puromycin-sensitive aminopeptidase	3	1	0.985266	-0.0186865	0.972506	0.026214	0	0	11.3101	11.2017	10.8359	11.6319	11.5473	11.9567		10.9671	11.8289	12.199		12.0167	11.0065	11.7375	11.006	12.6761	11.3428	10.9601	11.5979	11.2543		11.4721		10.9526		11.4669	11.0459	11.2261	11.4632	11.1266	11.403	11.6209	10.9565	10.9586	12.754	12.209		11.376	11.6871
TRAT1_HUMAN	Q6PIZ9	T-cell receptor-associated transmembrane adapter 1	2	2	0.995756	0.0177391	0.991167	0.0268773	0	0	9.5703	9.83447				10.1397				9.33157				9.90198							9.53406						9.85201						10.2288			9.39194
K2C5_HUMAN	P13647	Keratin, type II cytoskeletal 5	9	3	0.68688	-0.106714	0.975763	0.0269851	0	0		14.2181	13.7362	13.4141	13.2029	14.1072	13.599			13.6554	13.3906			13.2694	13.4744	13.4281	13.5097	12.9974	13.4218	12.5562	13.4503	14.0307	14.3977		13.9192	15.1042	13.8922	14.0959	15.6095	13.9106	12.623	14.6171	13.9279		13.9599	13.5763			13.9341
HMCN2_HUMAN	Q8NDA2	Hemicentin-2	6	6	0.774405	0.0570977	0.938157	0.0271837	0	0		10.7453	11.0128	11.0039	11.179	11.3628	11.2439	10.9904	11.3797	10.7533		11.2561	11.6545	10.9888	11.247	11.0376	10.925	11.0311	11.4576	10.6234	10.5945	11.5267	11.0367	10.8289	11.5864	10.7736		8.25015	11.51	11.2634	10.9504	11.256	11.1804	11.2007	10.9565	10.5739	11.0633	11.5487	10.9233
PPB1_HUMAN	P05187	Alkaline phosphatase, placental type	9	1	0.904247	0.0265509	0.88511	0.0285451	0	0	11.3198	12.2019	11.7882	11.3149	11.1341	11.5852	11.4592	11.8438	12.2634	11.5078	11.2005	12.6132	12.5919	11.304	11.8941	11.7389	11.708	12.1342	11.6112	11.6545	11.3775	11.6147	11.6384	11.2465	11.9982	11.6681	11.5284	11.4229	11.7051	12.0427	11.6217	12.1252	11.8313	11.8391	12.2098	11.2131	11.1976	11.4575	11.9477
MASP1_HUMAN	Q9UF09	Mannan-binding lectin serine protease 1	27	26	0.649969	-0.0471447	0.843097	0.0287608	0	0	12.8549	12.3101	12.1873	12.2594	11.914	12.4279	11.385	12.479	12.3246	12.2981	12.331	12.9419	11.924	12.3762	13.0099	12.721	11.9174	12.6615	12.374	12.8881	12.6157	12.697	12.7303	12.5742	12.5475	12.6017	12.7289	12.1498	12.3624	12.285	12.4234	12.9941	12.6698	12.6428	12.4098	12.0308	12.169	12.6741	12.5556
HS90B_HUMAN	P08238	Heat shock protein HSP 90-beta	15	1	0.0131122	0.364499	0.9666	0.0289732	+	0		11.3343	11.2368	11.3301	10.78	12.3424	10.6608	9.50043	10.4022	10.0978	10.089	10.5418	10.2011	10.2574	10.4534		11.4393	10.6239	10.8003	11.385	9.95863	11.4902	10.679	11.3619	11.5884		10.4148	11.2705	10.0217	11.1062	11.0694	11.2747	11.5247	11.1551	11.4391	10.3019		10.975	10.7951
CATS_HUMAN	P25774	Cathepsin S	6	6	0.781259	-0.043645	0.878552	0.0298251	0	0	10.7043	10.5322	10.8175	10.9387		10.6335	10.7003	10.9716	10.8924	10.9999	10.2789	10.8627		10.6964	10.9455	11.1824	10.9154	10.7513	10.7549	10.9321	11.0411		10.9209	11.1128	11.0849	10.9846	10.7261	10.8167	10.8561	10.812	11.043	11.3287	11.0219	10.9521	11.4362	11.5727	10.5829
CLIC4_HUMAN	Q9Y696	Chloride intracellular channel protein 4	5	4	0.470931	-0.124668	0.953517	0.0299794	0	0	14.0807			12.9959	13.016					13.0786	14.2982		13.9347		13.0119		13.4865	13.2578	13.2465		13.3286				13.4239	14.2965	13.7542							13.34		13.377	13.3535	13.5856	13.7432
VINC_HUMAN	P18206	Vinculin	66	66	0.966196	-0.0192068	0.914489	0.0302811	0	0	11.5032	12.2426	11.5366	11.0597	10.7686	11.5618	10.1274	11.3182	11.2265	11.2405	11.2669	11.5814	10.3343	11.1126	10.705	11.7416	11.066	10.9645	10.9917	11.5403	11.0467	11.7596	11.0843	11.197	11.1195	11.5571	10.8919	11.4128	11.6236	11.3768	11.2351	11.7983	11.8194	12.6016	11.849	11.0448	11.0957	11.9057	11.141
PPIB_HUMAN	P23284	Peptidyl-prolyl cis-trans isomerase B	12	10	0.0709528	0.29483	0.967634	0.0303272	0	0	15.4945	16.0241	15.585	15.871	14.4442	14.6034	14.587	14.9176	14.9301	15.0607	15.528	15.4013	14.9279	15.5136	14.7122	15.3948	15.1872	16.0132	15.41	15.4556	16.4178	16.4776	15.1896	15.1415	16.0038	15.0485	14.9618	16.7853	14.1686	15.5233	16.7561	15.0037	15.7797	14.8122	16.4458	17.5607	14.5837	16.6626	15.8155
PRP6_HUMAN	Q9NTE6	Pre-mRNA-processing factor 6	3	3	0.818673	0.0439577	0.899572	0.0307084	0	0	11.7427	11.8653	11.5011	11.0522	11.5345	11.7832	11.594	11.0082	10.787	11.5544		11.7081		11.5849	11.2906	12.1423	11.73	11.4343	11.7265	11.9997	11.2419	11.6777	11.9942	11.73	11.9173		11.6063	11.9423		11.9819	11.5778	12.3768	12.2919	11.893	12.4375	11.839	10.9006	11.7994	11.4426
BTD_HUMAN	P43251	Biotinidase	16	16	0.999075	-0.00197514	0.791694	0.030845	0	0	13.7122	13.199	13.3327	13.2749	12.8915	13.6919	12.9292	13.321	13.113	13.3586	13.4275	13.418	13.1576	12.6975	13.8499	12.7887	13.2211	13.5343	13.232	14.0042	13.5724	13.4784	13.2963	13.0623	12.8205	13.4406	13.5767	13.4115	13.3139	13.6096	13.4526	14.141	13.5156	13.4796	13.4413	13.5232	13.1666	13.3504	13.4846
C1RL_HUMAN	Q9NZP8	Complement C1r subcomponent-like protein	18	17	0.993077	-0.00496879	0.752006	0.0313333	0	0	15.1316	14.4778	14.4177	13.9239	14.4484	14.4282	14.5075	14.4619	14.3765	13.9839	14.8432	14.6402	14.4512	14.0112	14.5031	14.6087	13.7415	14.2281	14.3822	14.9884	14.3918	14.4626	14.5067	14.7118	14.5894	14.9248	14.4072	13.7452	14.7636	14.5466	14.6031	15.0357	14.5542	14.3884	14.474	14.0986	14.4347	14.8655	14.5039
PDE5A_HUMAN	O76074	cGMP-specific 3',5'-cyclic phosphodiesterase	4	4	0.288159	-0.197766	0.965074	0.0318644	0	0	13.684	15.3056	13.5594	14.3249	13.8982	13.873	11.7682	14.2195	14.514	13.9953	12.2556	14.1175	13.2777	14.699	14.3132	14.2718	12.9176	14.1605	13.2247	13.65	11.5834	14.5994	13.1977	14.2743	14.2003	13.5143	12.7617	14.4833	13.8851	14.1051	14.7956	15.7935	15.2076	14.7837	13.1909	11.8879	14.2575	14.2602	14.9751
CFAB_HUMAN	Q9BX92	Complement factor B	136	136	0.961053	-0.0134798	0.791932	0.0320778	0	0	14.459	14.1027	14.4489	14.3658	14.6414	14.6051	14.4427	14.1651	14.5973	14.8613	14.3675	14.7043	14.3408	13.9661	14.2447	14.7842	14.1767	14.1381	14.6025	14.2861	13.7949	14.3727	14.116	14.2971	14.5079	14.5995	13.7862	14.2631	14.6127	14.5515	14.4858	14.4867	14.1431	14.4329	14.5693	15.0765	14.5489	14.6037	14.2879
PA2G4_HUMAN	Q9UQ80	Proliferation-associated protein 2G4	5	5	0.65951	-0.0939436	0.949209	0.0323689	0	0	12.6788	13.0576	12.274	12.3541	12.2923	12.2449	10.4558	11.6001	12.8778	11.8507	11.2386	12.0591	11.762	12.8652	12.4209	12.0795	11.9491	11.892	11.6935	11.9381	11.0517	12.2865	11.7155	12.4785	12.0458	12.44	11.0887	12.3716	12.1573	12.6778	11.55	13.9923	13.282	13.1211	11.8174	11.3541	12.4313	12.4709	12.6808
MTAP_HUMAN	Q9H010	S-methyl-5'-thioadenosine phosphorylase	2	2	0.185321	-0.232784	0.948366	0.0329078	0	0	11.239	11.3022		11.4818		11.5545			11.4622	10.7725		11.7292						12.1085	11.8388	10.6374	11.1641	10.9638	11.2899	11.8619		11.8299	10.675		11.7782	11.7714		12.9241	11.6244	11.3288		11.078		11.14	11.3088
CO8A_HUMAN	P07357	Complement component C8 alpha chain	44	44	0.645559	0.0390386	0.718612	0.03303	0	0	17.9949	17.6008	17.5866	17.2833	17.5798	17.723	17.5516	17.8124	17.9462	17.9	18.1479	18.1025	17.7623	17.2196	17.6109	18.0055	16.966	17.8479	17.7038	17.6992	17.8505	17.3856	17.6852	17.4368	17.6317	17.6386	17.5314	17.85	18.0782	17.9386	17.5799	17.6391	17.5743	17.9667	17.8516	17.8908	17.8101	18.029	17.3316
ISK5_HUMAN	Q96PP2	Serine protease inhibitor Kazal-type 5	10	10	0.387137	-0.122711	0.926903	0.033101	0	0	13.5758	13.2708	12.6783	13.278	13.0177	13.3543	11.9537	14.265	13.8388	13.0146	13.6609	13.5591	13.7838	13.5127	12.0696	14.1876	12.8514	12.8196	13.2072	12.9802	12.4386	13.3378	12.4427	13.355	12.8535	13.6146	12.256	13.1012	13.8009	13.2285	13.4461	13.3307	13.1974	14.0517	13.1158	13.0923	13.7367	13.2304	12.8266
PSB1_HUMAN	P20618	Proteasome subunit beta type-1	7	7	0.934801	0.0305208	0.908093	0.0333934	0	0	11.171							10.8746	10.312			11.3708		11.5963	10.8512					11.1689	10.8481		10.9218	10.9213		11.1712				11.211				10.6431					11.1115
CO8G_HUMAN	P07360	Complement component C8 gamma chain	17	17	0.792566	0.0299451	0.730728	0.0340489	0	0	16.7971	16.4024	16.4988	16.3815	16.5825	16.6907	16.5111	16.6909	16.5774	16.719	16.741	16.7213	16.6978	16.2273	16.704	17.015	15.6356	16.517	16.3248	16.9349	16.662	16.7782	16.8748	16.4858	16.4427	16.4632	16.5913	16.6497	16.5215	16.7671	16.5844	16.4302	16.4334	16.694	16.5912	16.8707	16.7717	16.7617	16.3734
TPM2_HUMAN	P07951	Tropomyosin beta chain	15	2	0.458988	-0.117297	0.928761	0.0346049	0	0	14.902	15.0675	14.2487	14.2741	14.4856	14.616	13.9737	15.5594	14.601	14.6843	14.3299	15.0268	14.6425	14.9998	14.8311	14.7243	15.0741	14.6544	14.3517	14.2923	14.086	14.7243	14.6639	14.6247	14.6309	14.7477	13.7006	15.0636	14.7933	15.1565	15.4829	16.1246	15.5397	15.8108	14.5174	13.7485	15.4142	15.3352	15.1071
TGFB1_HUMAN	P01137	Transforming growth factor beta-1	2	2	0.905051	-0.05361	0.958659	0.0359116	0	0			11.2888			11.0883			10.9516		11.0644	11.716				11.858	11.0757			11.2886		11.024		10.4618	11.3821							11.6517	11.1147	10.9644	11.7642	10.984	10.757
ENPL_HUMAN	P14625	Endoplasmin	21	15	0.985474	0.0151424	0.91175	0.0359226	0	0	10.6148	10.9484	10.6989	11.1012	10.8215	11.2103	10.265	11.1086	11.1708	12.1293	11.2719	11.5304	11.4357		11.504	10.7394			11.2525	11.5096	10.6992	10.5815	10.8168	10.0147		11.3432	10.1976	10.671	11.0262	10.741	11.0937	11.0938	10.7818	10.5825		11.681	11.0161	11.6688	10.3661
SKAP2_HUMAN	O75563	Src kinase-associated phosphoprotein 2	3	3	0.992751	-0.00853099	0.867784	0.037194	0	0	17.94	17.3488	17.0163	17.1206	17.0343	17.7971	16.6725	17.5651	17.8921	17.0365	17.9078	17.8105	18.3936	17.4706	16.922	18.0332	17.0869	17.3132	17.5789	17.3076	17.4411	16.8555	17.6913	17.6841	17.3479	18.0399	17.3024	17.0981	18.1408	17.4028	17.9832	17.9575	17.4137	17.4115	17.9226	17.5778	17.7042	18.1866	17.2297
POSTN_HUMAN	Q15063	Periostin	13	13	0.821813	-0.0811823	0.951623	0.0373907	0	0	12.7546		12.8437	11.2341		12.8755	11.0447	12.699	13.0565	11.809	13.5428	12.1881	10.2318	12.6913	12.2738		12.6741	12.838	13.0735	11.7689	12.6935		12.9035	12.9737	13.454	14.0551	13.1788	13.021	14.0074	11.9381	13.0395	12.962	13.0031	12.7447		12.5826	13.4104	12.8255
ECM2_HUMAN	O94769	Extracellular matrix protein 2	4	4	0.989453	-0.0347495	0.983704	0.0374248	0	0	20.3581			19.7697					19.5634													19.3614		19.3965			18.6324						19.2829				19.6799
TPM4_HUMAN	Q9UCS3	Tropomyosin alpha-4 chain	30	16	0.507473	0.0977137	0.892165	0.0378908	0	0	12.0375	12.8449	11.5353	10.5959	11.2772	11.6907	12.1128	12.8056	11.6616	12.0043	12.0344	11.7627	12.1053	11.3741	11.3853	11.9447	12.0707	13.5094	11.9635	11.398	11.4234	12.3431	11.3757	11.7089	11.9051	12.6036	11.3728	11.6697	12.4441	11.4035	11.9171	11.9077	11.9363	12.8841	12.1778	11.2708	11.6573	12.2708	11.3902
PIGR_HUMAN	P01833	Polymeric immunoglobulin receptor	3	2	0.949892	-0.0292889	0.897235	0.0386992	0	0	19.0598	19.2238	19.0628		18.8143	18.8248		17.9496			18.7956	19.2893	18.9319			19.2567	18.6298			18.05			18.9018	18.8146	19.0631	18.7624		19.1774	19.1822			18.4373		19.0444	19.3678	18.7072	18.5238		19.1026
PEDF_HUMAN	P36955	Pigment epithelium-derived factor	35	34	0.913773	-0.0201274	0.702234	0.0392142	0	0	17.3791	16.7724	16.3881	17.0353	17.0961	17.4624	17.3656	17.0825	17.1377	16.9716	16.7873	17.1184	17.3988	16.6498	17.3054	17.2342	16.5319	16.8145	17.107	17.2891	17.291	16.4494	17.2839	17.0532	16.8456	17.2892	16.7987	17.0605	17.1915	16.8618	16.8503	17.0623	17.5291	17.4949	17.0452	16.8712	16.778	17.4618	17.0193
TPM1_HUMAN	Q6DV90	Tropomyosin alpha-1 chain	14	3	0.621066	0.109961	0.926429	0.0395872	0	0	11.7313	11.7522	11.8587	11.3277	13.2252	12.1222	11.549	12.616	11.3164	12.719	10.8096		11.8476	10.7567	12.4939		12.3158	12.1511	12.0515	11.495	11.7505	12.0004	12.4597	11.9621				10.6815	11.9694	12.1186		13.0008	11.5965	12.1444	12.0197	11.4213
RHG18_HUMAN	Q8N392	Rho GTPase-activating protein 18	5	4	0.664335	0.0691065	0.866389	0.0396566	0	0	13.2722	14.0035	12.8034	12.3331	13.318	13.6484	11.8619	13.5699	13.7871	12.9786	13.0703	13.8226	12.4655	13.289	13.6819	13.5245	13.7905	13.1065	13.6085	13.5746	13.4673	14.2135	12.3083	13.2284	13.2434	13.4169	12.344	13.5471	13.2835	13.425	13.5535	13.9459	13.7857	13.71	13.292	13.6959	12.7432	13.4455	13.9798
TENX_HUMAN	Q9UMG7	Tenascin-X	25	16	0.609391	0.0778772	0.865912	0.0405924	0	0	14.4126	14.4312	14.3824	13.94	15.0797	14.4852	13.4115	13.8859	14.4983	14.035	13.8682	14.6894	12.8892	12.9525	14.3521	13.9044	14.6403	13.9839	13.6447	14.0834	14.3391	14.9677	14.3159	14.6325	14.3984	13.9974	14.1169	14.9399	14.0963	14.3331	14.665	15.0857	14.6753	14.4822	14.6143	14.6482	13.8035	14.0551	14.3835
GPVI_HUMAN	Q9HCN6	Platelet glycoprotein VI	3	3	0.354724	0.121004	0.874659	0.041476	0	0	16.0805	15.5325	15.3906	15.3089	14.6843	15.3236	13.9114	16.3519	15.9742	15.3539	15.4335	15.9263	15.7244	16.4202	15.1148	16.2154	15.7645	15.1981	15.4783	15.3179	15.6782	15.758	14.7618	15.9593	15.3632	15.7057	14.1964	15.573	15.3972	15.5579	16.0484	15.4554	15.6008	16.6693	15.3001	15.9197	15.6395	15.3568	15.4583
SORCN_HUMAN	P30626	Sorcin	2	2	0.903791	0.0714754	0.963076	0.0417399	0	0	12.2531	13.566	12.0105	13.4075	12.2657	11.9448	9.83581				11.2626			11.9921	11.7103		11.5932		10.6878	12.1786	11.3443	12.123	10.1935	11.8991	11.6461		10.5378	12.1553		10.8344		11.9297	12.7003	13.2572		11.2962	10.8335	12.8806	10.6682
IL27B_HUMAN	Q14213	Interleukin-27 subunit beta	2	2	0.738538	-0.110034	0.955445	0.0419643	0	0		11.7711	11.6587	11.5138	12.0378	13.5155	11.5365	12.4891	12.7179	12.9349	13.2616		12.6952	12.4987	11.9133	12.2592	14.5189	11.3254	13.6021	11.5167	11.9941	11.8364	11.2906	13.4178	12.4185	13.3328	11.7708	12.1278	12.3194	12.4768	12.194	12.4268	13.1589	13.2987	11.7883	11.2632	12.7676	12.6299	12.0121
PVR_HUMAN	P15151	Poliovirus receptor	7	7	0.348387	-0.107389	0.837082	0.0423373	0	0	11.7898		11.3564	11.1419		10.9067		11.7712	11.696	11.9095	11.3825	11.9978		11.4348	11.7823	12.0822	10.5321	12.0403	11.3933	11.5814	11.4233	10.7781	11.4492	11.4433	11.7902	11.6778	11.7992	11.5713	12.0662	11.4553		11.8576	11.8477	11.9613		11.5437	10.8242		10.8465
SYDC_HUMAN	P14868	Aspartate--tRNA ligase, cytoplasmic	3	3	0.838696	0.0617553	0.900662	0.042714	0	0	13.9331				14.6151		14.9197		14.5557		14.3094	13.9185	14.2236			13.9625	14.5111					15.7491	14.072		13.5779				13.7604						15.3013				14.6457
NCF2_HUMAN	Q9BV51	Neutrophil cytosol factor 2	2	2	0.0736687	-0.195173	0.844381	0.0428753	0	0		9.84126	9.93868			10.3994		9.15349	10.3317	9.47638	9.64369	10.3636			9.43681	10.6431		9.86164		10.3379	9.83309	9.7654		9.86993			9.37568			10.1038	10.1772			9.21395	10.5439	10.1577	9.5986	10.9955	9.96561
CATB_HUMAN	P07858	Cathepsin B	3	3	0.0510322	0.235936	0.884856	0.0433538	0	0	12.155	12.4032	12.7197	11.5917	12.31	12.0643	11.0544	12.6573	12.3891	12.5161	11.5316	12.5364	12.1739	12.8932	12.272	13.2023	12.0195	12.6672	12.6188	13.1236	12.7264	12.2186	11.3224	12.372	12.8146	13.1039	11.3091	12.947	12.8575	12.6489	12.5892	12.4879	12.3279	13.5049	11.9014	11.7177	11.7412	12.3195	12.901
MGAT1_HUMAN	P26572	Alpha-1,3-mannosyl-glycoprotein 2-beta-N-acetylglucosaminyltransferase	3	3	0.23343	-0.156187	0.880104	0.0434078	0	0	13.4918		12.9629		12.3667	13.1909	12.9766		13.2371	13.5601		13.1035	12.6887			13.359	12.8267		13.0843	13.4721	13.2607						13.3522				12.8653	13.1571		13.1329	13.3595	11.9965	12.9596
AATC_HUMAN	P17174	Aspartate aminotransferase, cytoplasmic	4	4	0.854635	0.187714	0.991376	0.0437694	0	0														9.86397					9.69511		9.66851					10.6046
CAH3_HUMAN	P07451	Carbonic anhydrase 3	4	4	0.872909	-0.133966	0.98502	0.0443248	0	0															10.8197					10.91		10.9578								10.8556						10.6341
LG3BP_HUMAN	Q08380	Galectin-3-binding protein	17	17	0.999916	-0.000833788	0.763439	0.0468779	0	0	11.4416	10.9855	11.2334	10.3015	10.1973	10.7751	10.3899	10.6603	10.1465	10.0806	10.5475	10.4891	10.2369	10.4894	9.67392	10.6015	11.3542	10.4886	10.6585	11.1231	10.5039	11.2173	10.403	10.2603	11.01	10.3067	10.9366	10.5471	10.9131	11.4258	10.4218	11.0346	10.5715	10.576	11.2968	10.3825	10.8619		10.7354
RTN4R_HUMAN	Q9BZR6	Reticulon-4 receptor	2	2	0.972685	-0.0251959	0.886017	0.0490454	0	0		10.4584	10.4341	10.1296	10.1356	9.71057		10.1649	9.52334	9.41692	10.6985		10.6231	10.6154	9.9137	10.8726	10.0316				9.5972	10.5824		10.4007				10.9071		10.4971	10.9117	10.0249	10.502	10.5995		9.23865	9.42585		9.77754
MFAP5_HUMAN	Q13361	Microfibrillar-associated protein 5	3	3	0.552315	-0.0897376	0.826404	0.0490858	0	0	11.5604	11.2222	10.1243	11.2331	11.4962	10.89	10.5649	11.6654	11.7457	11.9539	12.8322	11.6323	11.771	12.1329	11.8431	11.9769	11.4843	12.1444	11.7015	12.0369	11.4733	11.4763	11.1515	11.8282	11.4901	11.6847	11.2803	12.3058	12.6835	10.7121	12.1698	11.9628	10.1661	12.2458	12.3713	11.6642	11.7833	11.7019	10.8079
ARPC3_HUMAN	O15145	Actin-related protein 2/3 complex subunit 3	8	8	0.525098	0.0951525	0.834672	0.0493521	0	0	12.7381	13.1357	11.9613	12.0919	11.6869	12.4946	11.6415	12.7338	12.1895	12.2076	12.8184	12.406	12.7063	12.733	12.1935	12.4159	11.6666	11.7559	12.3409	13.0725	12.2625	12.5127	12.4332	12.67	12.3207	13.1359	11.9069	12.4778	13.1049	11.7183	12.4494	12.8372	12.1422	12.8289	14.2395	12.3235	11.7283	12.5307	12.2603
ZN311_HUMAN	Q5JNZ3	Zinc finger protein 311	2	2	0.722053	-0.34624	0.811244	0.0503657	0	0																											9.51658
ADIPO_HUMAN	Q15848	Adiponectin	4	4	0.150081	-0.238555	0.906898	0.0506742	0	0	13.5149	14.0952	14.2673	13.9051	13.6335	14.9527	12.9049	14.4655	14.7784	14.054	15.5016	14.7046	14.4202	14.2364	15.3819	13.3124	14.5313	15.6901	13.9683	15.0163	14.9304	15.0242	13.9407	14.1558	15.9891	14.6322	15.0025	15.7566	14.8254	13.6619	14.5559	14.1862	13.6054	14.5126	15.6707	14.3787	13.8904	13.4216	14.6727
ERP44_HUMAN	Q9BS26	Endoplasmic reticulum resident protein 44	2	2	0.584733	0.186015	0.967868	0.0509963	0	0								11.9842	11.7986	10.7862						11.9434			11.3615		11.747					12.1303				11.4069	11.8124	11.7187	12.2805		12.1068	11.4871	11.3399		11.6874
BIN2_HUMAN	Q9UBW5	Bridging integrator 2	6	6	0.847129	0.0327566	0.653071	0.0512244	0	0	13.3448	13.2061	12.9756	13.2844	13.1466	12.732	12.5614	13.7958	13.5977	13.567	12.9638	13.0408	12.9727	13.3601	13.1791	12.9269	12.9046	12.6973	13.0087	13.0568	12.6175	13.3428	13.2429	13.6077	13.0595	13.5181	12.8336	13.2618	13.3745	13.4488	12.8211	13.1613	13.1004	13.3182	12.8588	13.4536	13.5236	12.797	13.0441
MANF_HUMAN	P55145	Mesencephalic astrocyte-derived neurotrophic factor	5	4	0.392182	0.133531	0.857947	0.0516658	0	0	12.8038	13.0835	13.2176	12.8835	13.0622	13.2309	13.1336	12.3758	11.9099	13.3453	11.7855	12.9945	11.2483	13.4798	13.6646	13.511	13.1171	12.7434	13.3089	14.372	13.5038	13.5947	13.6061	13.25	13.4635	11.2789	13.009	13.1223	12.0308	13.3758	13.4671	14.0332	13.1443	13.1507	13.7917	13.1628	11.9966	12.9187	12.7137
CHM4A_HUMAN	Q9BY43	Charged multivesicular body protein 4a	2	2	0.193472	-0.424842	0.0369175	0.0518998	0	--					10.8315																10.4186											10.7979
IL1R2_HUMAN	P27930	Interleukin-1 receptor type 2	2	2	0.0224526	0.280157	0.861575	0.0527014	+	0	14.1385	14.7461	14.2037		14.4496	14.3365	13.2748	15.7333	14.3357	13.8859	14.8747		13.783	14.4929	14.233	14.5408	14.8441	13.7926	14.19	13.6449	13.7796	15.4088	13.4267	14.8986	14.1148	14.7698	13.5433	14.7144	15.1186	14.6764	15.6387	14.5659	14.7324	15.0861	14.194	14.3166	14.5875	14.6447	14.7078
DOPO_HUMAN	P09172	Dopamine beta-hydroxylase	10	10	0.897055	-0.0231123	0.55178	0.0535411	0	0	16.9466	16.9968	16.7733	16.7209	17.0024	16.7343	16.6986	17.0777	16.7053	16.5605	17.4119	17.5199	16.6799	16.8995	16.714	17.0618	17.0798	16.387	17.2052	16.6973	16.858	17.1719	16.7775	16.8608	16.8164	16.894	16.8551	17.0584	16.7635	17.3578	16.93	17.075	16.9715	16.4439	17.2331	16.9492	16.9027	17.1819	16.6861
APLP2_HUMAN	Q9BT36	Amyloid-like protein 2	2	1	0.510424	-0.113437	0.86253	0.0540263	0	0	10.1892							10.7114		9.98781				10.7041	10.4952			10.9247	10.4245	11.1535	11.161		10.4522				10.6927							10.8842
VASP_HUMAN	P50552	Vasodilator-stimulated phosphoprotein	8	8	0.779483	0.054794	0.758417	0.0545155	0	0	12.4325		10.8818	11.8035	11.7825	12.2615	11.1572	11.7316	11.643	11.2432	10.4654	11.6477	10.9184	11.5863	11.3167	11.8682	11.6602			11.1132	10.3277	12.0601	11.7024	11.8979		11.6963	11.914	11.772	11.3712		11.5553	12.1503	11.9697	11.0004	11.9313	11.369	11.6345		11.388
PLDX1_HUMAN	Q8IUK5	Plexin domain-containing protein 1	2	2	0.247423	-0.144336	0.804741	0.0546011	0	0	13.8465	13.1372	14.1311	13.0224	13.6805	13.9924	12.8101	12.3394		13.8666	13.9368	13.3938	13.7051				13.9676			14.7498	13.7933	13.6023	13.8014	13.2392		13.405	13.6169	12.9745		13.6307	13.1371	14.1292	13.581	13.638	13.6423	14.3818	12.9463		13.2852
VTNC_HUMAN	P04004	Vitronectin	68	67	0.870367	0.0179178	0.269845	0.0554167	0	0	14.5282	14.0276	14.0782	13.7305	14.1749	14.1916	13.8269	13.9593	14.2094	13.9774	14.05	14.4773	14.2109	13.7441	14.0602	14.2135	14.0127	14.113	14.32	14.173	14.1552	14.102	14.0015	13.9726	13.987	14.3935	14.1279	14.232	14.0698	13.9386	14.1418	14.3927	14.3696	14.146	13.8318	14.0268	13.4187	14.3999	14.0554
ALDOB_HUMAN	P05062	Fructose-bisphosphate aldolase B	15	13	0.172063	0.148123	0.757029	0.0555698	0	0	17.1604	17.6411	17.5045	18.4459	17.6981	17.8534	16.9894	18.1714	17.8661	17.1981	18.1391	18.1437	18.7339	17.446	17.2109	18.5653	18.3621	16.5491	17.3682	16.9826	17.9778	17.6519	16.9978	17.7778	17.5184	18.2683	16.6908	18.3734	17.831	17.8633	18.3884	17.953	17.1804	18.0641	17.5154	17.8342	18.2464	17.9016	17.338
DUS3_HUMAN	P51452	Dual specificity protein phosphatase 3	2	2	0.993406	0.0146972	0.911089	0.0555741	0	0								10.2262						10.3886							9.8667
CO6A3_HUMAN	Q53QF6	Collagen alpha-3(VI) chain	42	42	0.446333	0.0530896	0.397521	0.055638	0	0	15.3053	15.8511	15.637	15.5603	16.4154	16.057	15.5419	15.4556	15.7486	15.3154	16.0091	15.6649	16.0382	15.8947	15.7977	16.0496	15.7604	15.8607	15.4026	15.7057	15.8188	15.8332	15.693	15.6705	15.6089	15.9226	15.8952	16.1872	15.6091	16.0525	16.0674	16.0629	16.0498	16.0243	15.805	15.9097	15.6831	15.7979	15.958
FBLN3_HUMAN	Q12805	EGF-containing fibulin-like extracellular matrix protein 1	20	20	0.979666	0.0119074	0.622103	0.0561005	0	0	12.1659	11.9801	11.8833	11.874	11.6981	12.3885	11.5038	11.8494	11.6536	11.4231	12.2257		12.1065	11.8652	12.1693	11.7159	11.7447	12.1214	12.4887	12.1735	11.6576	12.1995	12.5074	12.2418	12.3675	11.9948	12.1566	12.0973	12.0595	11.7683	12.7467	12.4645	12.4471	11.9572	12.3135	12.5237	11.5524		12.0459
MST1L_HUMAN	Q2TV78	Putative macrophage stimulating 1-like protein	15	1	0.813417	-0.040199	0.00604519	0.056892	0	--	11.9625	11.8927		11.8441	12.057	12.2022	11.516	11.9106	12.3088	11.778	12.4578	11.7687		11.1249	12.121			11.6641	11.7408	12.3127		12.1958	11.7757	11.8091	11.8486	11.3206	11.9748	11.6757	12.5696	12.0743		12.3327	12.2261	12.1633	12.1836	11.6531	11.9407	11.0547	11.8847
PSB5_HUMAN	Q86T01	Proteasome subunit beta type-5	4	4	0.936212	0.0491234	0.914799	0.0571364	0	0	11.7826	11.7983	10.5884		11.4865	11.3061	11.4685	10.5723	10.9135	11.4651		11.2093		11.4837		11.2307		9.73875				11.2801	11.4545	11.1985	11.2432		11.3712	11.4206	10.7979	11.5993	11.1801	11.9473	11.9795	11.0427			11.3109	11.3397	11.2935
ANXA3_HUMAN	P12429	Annexin A3	15	15	0.415802	0.683651	0.00472362	0.0575663	0	++			12.4818	12.7445
RADI_HUMAN	P35241	Radixin	14	2	0.625281	0.154862	0.92877	0.0582688	0	0	10.3943	11.1236	11.3219	11.7485	10.5184	11.1547	9.69155	11.9904	10.8442	10.2424	10.826				10.4605		11.7124	12.1768	11.1793	10.3757	10.4339	10.6732	10.7518	11.6513	10.6704	13.8115	10.4652		10.792	10.5837		11.2939	11.8554	12.0142	10.6957	10.7342	10.9283
ALDOA_HUMAN	P04075	Fructose-bisphosphate aldolase A	21	18	0.771583	-0.0447487	0.630038	0.0586687	0	0	17.8137	17.9379	18.3904	18.3872	17.3465	17.6622	17.7101	18.1335	17.536	16.6278	17.9839	17.8416	18.4142	17.4846	17.5153	17.9162	17.5769	17.6058	17.7771	17.5297	17.7741	17.804	17.4447	17.5878	17.9775	17.973	17.6813	17.7809	17.4484	17.8664	18.1595	17.758	17.7873	18.3569	17.9528	17.4275	17.116	17.898	17.3155
PLOD1_HUMAN	Q02809	Procollagen-lysine,2-oxoglutarate 5-dioxygenase 1	3	3	0.0482686	-0.00665863	0.000465625	0.0593562	--	--	11.4559	12.1515	11.5729		11.4873		11.7321	11.1441	11.4891	10.9206		12.5594			11.5841	12.5572	11.8105	11.9108	11.7151	11.6169	11.2138	10.89		11.3791		12.1952		11.2489	11.701	11.6206	12.5022	12.6525	11.7816	10.5771	12.8019		11.4706	12.6965	12.0101
GDIB_HUMAN	P50395	Rab GDP dissociation inhibitor beta	13	9	0.98417	0.0109917	0.620001	0.0595451	0	0	11.4778	11.7004	11.1732	11.214	11.2195	11.3555	10.7864	11.4425	11.7194	11.1031	11.6883	11.8652	11.2666	11.8811	11.2972	11.9366	11.9231	11.056	10.7649	11.4457	11.2006	11.7534	11.7143	11.7939	11.6229	11.5731	10.9237	11.7872	11.4147	11.4157	11.8804	11.9287	11.9879	10.8501	11.8158	11.5252	11.3556	11.8947	11.5135
IL1AP_HUMAN	Q9NPH3	Interleukin-1 receptor accessory protein	11	11	0.605499	0.0794525	0.731286	0.0595686	0	0	11.0819	11.7532	10.9616	10.827	10.9043	11.0357	10.6822	11.1911	11.2363	11.3104	11.3012	11.1635	11.6252	11.2111	11.0095	11.7716	10.9228	11.0396	10.8293	11.661	10.7215	11.8081		11.28	12.0522	10.7723	11.28	11.3292	11.2625	9.89398	10.9871	11.9187	11.0061	11.5101	11.3263	11.7683	11.2197		10.9414
GMPR1_HUMAN	P36959	GMP reductase 1	2	2	0.257083	0.296075	0.935648	0.0604761	0	0	11.2581	14.2525											11.1105					12.9997		10.9691	11.8705		11.49	10.4549			11.4047			11.9164			11.3937	11.2367	11.8351				10.7885
CA123_HUMAN	Q9NWV4	UPF0587 protein C1orf123	2	2	0.643268	0.504014	0.993663	0.0606813	0	0	16.5948											17.6595	17.0397	16.4707			16.9478			9.14377				13.3852					17.0824	17.4541	16.9843	16.4494			15.8962		17.044	17.0979	16.5382
SAP_HUMAN	Q53Y86	Proactivator polypeptide	5	5	0.122054	0.124531	0.571573	0.0606929	0	0	11.3005	11.8517	11.5048	12.1279	11.5166	11.876	11.6095	11.8671	12.2063	11.7356	12.6675	12.42	12.1938	12.4398	11.7746	12.4972	12.0206	12.3711	11.5683	12.1283	11.8251	11.4529	12.1778	11.8779	11.6918	11.9466	11.5906	11.52	11.784	12.2498	11.9797	12.3431	11.0857	11.724	11.7744	11.6331	11.7261	12.1204	11.0826
ATS16_HUMAN	Q8TE57	A disintegrin and metalloproteinase with thrombospondin motifs 16	3	3	0.839765	0.0598138	0.831779	0.060881	0	0		10.6846	10.7183			10.5242		12.1009	10.5233		11.1673	12.3666	11.9294	10.9364	10.9167	11.2913	10.7336	11.2269	11.0121	10.9362	11.4894	10.7781	10.0816	11.1076		11.929	9.88667	10.7776	11.3248	10.3658	12.4088	11.1451		12.385	11.0483	11.3953	11.5106	11.3381	10.2251
FUCO2_HUMAN	Q9BTY2	Plasma alpha-L-fucosidase	9	8	0.995928	0.01101	0.853008	0.0612815	0	0	10.5607	13.0359	12.726	12.679		12.1852		12.923	12.6346	12.4661	12.9599	13.0718	12.7964	11.5302	11.5844	13.0754				13.7434	12.5418			12.9394		12.6594	13.0449		12.9337			13.2234	12.8011	12.9068	13.2339	12.6762	12.7109	13.408	12.7122
FHR5_HUMAN	Q9BXR6	Complement factor H-related protein 5	26	22	0.996042	0.0053554	0.565508	0.0615863	0	0	12.267	11.3746	11.9122	12.185	11.5706	12.5903	11.6916	11.7373	11.6297	11.8311	11.8532	11.8307	12.3147	12.3844	11.7365	12.6898	11.6725	11.7868	11.6889	11.6888	12.1342	12.0724	11.9994	11.6418	11.8045	12.0848	11.6463	11.5892	12.0464	12.0038	11.4773	12.54	11.8442	11.5778	12.1017	12.719	11.9113		11.7877
ERP29_HUMAN	P30040	Endoplasmic reticulum resident protein 29	2	2	0.793534	-0.257106	0.98616	0.062361	0	0						10.4835	9.44389			10.7979					11.295			10.1907		10.5469					11.2086
COFA1_HUMAN	P39059	Collagen alpha-1(XV) chain	2	2	0.674921	0.0466902	0.500949	0.0624257	0	0	10.5186	10.9414	10.1198	10.8821	10.4095	11.0109	10.3402	10.6958	10.3653	10.6798		10.9161		10.8056	10.8299		10.4059	10.7566	10.6395	11.1501	11.0094	10.6362	10.4302	10.5314	10.7406		11.1546	10.6526	10.9152	10.547		11.3293	10.6153	10.8225		10.9263	10.4455		10.0206
PDIA3_HUMAN	P30101	Protein disulfide-isomerase A3	17	17	0.848147	0.0818798	0.89303	0.0624305	0	0	11.8526	12.4402	12.099			12.5377	13.7653	10.6315	11.7303	12.6664	11.5865	12.9188		11.8838	12.1016	12.1904		12.4236	12.1409	12.074	12.5368	12.6399				13.7501	12.6036			11.9222	12.2548	16.423		12.6258		12.6754	12.5635	12.0128
SODE_HUMAN	P08294	Extracellular superoxide dismutase [Cu-Zn]	4	4	0.554025	0.0902057	0.719472	0.0637315	0	0	10.4226		10.9821	10.7781		10.8803	10.6771	9.87059	10.2864	11.2673	9.7944	10.2216		11.1653	11.6406	10.784	10.8529	10.8938	10.9848	11.4169	10.4145	11.3762		10.4971	10.6434		10.9795		10.4614	10.6622	10.5966	10.5857	10.5926	10.5122		11.0628	10.5132
MDHC_HUMAN	P40925	Malate dehydrogenase, cytoplasmic	6	6	0.978293	-0.0189067	0.785642	0.0640773	0	0	10.6128	10.8701		10.4394		11.1125	11.3494	10.1638		12.1772				11.2553	11.3755	11.2429	11.35	11.1425	11.2095	11.9385	10.9671	11.3645	11.4302	11.1637			10.7838	10.8606				11.4085	11.2913	11.0038	11.4526	11.251			11.0482
PCYOX_HUMAN	Q9UHG3	Prenylcysteine oxidase 1	16	16	0.93728	0.0242267	0.605989	0.0666238	0	0	14.259	14.3891	14.0389	14.4134	14.3246	14.2522	13.5738	13.6898	14.0523	13.8979	13.8244	14.5059	12.7654	14.5862	14.8227	14.4359	13.8993	14.1203	14.0934	14.243	14.1527	14.1083	14.1257	13.7703	14.2795	14.4912	14.1469	14.8488	14.3549	14.4308	14.1787	15.5874	14.8163	13.8668	13.9627	14.0368	14.0123	14.6269	14.4456
C163A_HUMAN	Q86VB7	Scavenger receptor cysteine-rich type 1 protein M130	17	17	0.842648	-0.0480904	0.70604	0.067305	0	0	15.5124	14.9662	14.9855	14.4319	14.9262	15.3879	14.5627	15.0982	15.5039	14.8112	15.7351	15.2528	15.2071	14.6827	14.5328	15.1291	15.1057	16.2158	15.2569	14.4106	14.5329	14.7773	14.6766	15.5063	15.877	14.9752	15.0398	14.8013	15.577	15.3528	15.0249	15.4741	14.82	15.1814	15.2373	15.4065	15.6037	15.3587	15.5093
CSPG4_HUMAN	Q6UVK1	Chondroitin sulfate proteoglycan 4	7	7	0.61393	-0.0982086	0.77195	0.0674305	0	0		10.7234	10.4468			10.7152	9.80389	10.458	11.1921	10.0174	10.8466			10.8301		11.3317				11.1043		10.9578		10.7879		10.1097			11.226	10.6791		10.7396	10.6351		11.3777	10.5266	10.7225		10.972
CD14_HUMAN	P08571	Monocyte differentiation antigen CD14	15	15	0.986675	-0.0109077	0.577976	0.069167	0	0	12.8152	12.1091	12.047	12.0884	12.3562	12.6858	11.6639	12.795	12.1608	12.907	12.3933	12.5697	12.6017	11.9926	12.7313	13.0648	11.6584	12.3452	11.3548	12.5807	13.1992	12.7982	12.3338	12.1034	12.4966	13.0462	12.2538	12.3188	12.8267	12.454	12.2638	12.6618	12.764	12.6564	12.3683	12.1552	12.3678	12.4552	12.2404
TITIN_HUMAN	Q8WZB3	Titin	5	4	0.11385	0.183723	0.70049	0.0697916	0	0	12.3381	13.5181	13.1225	12.6903	13.6776	13.2331	12.0239	13.0596	12.9567	12.9183	13.2213	13.2504	13.2453	12.9346	13.5994	13.1763	13.7378	12.9004	13.9389	12.9377	12.7125	13.4746	12.0972	12.9257	13.042	12.7223	11.6401	13.318	13.0765	13.4825	12.6412	12.9669	12.9839	12.8255	13.2378	13.5333	13.1129	12.7739	13.1788
CD44_HUMAN	Q9UCB0	CD44 antigen	4	4	0.987225	0.00778367	0.351723	0.0704892	0	0	12.1303	11.8524	11.818	12.3374	11.8549	12.2254	11.7204	12.6272	12.3106	12.2218	11.9617	11.457	12.0874	12.1194	12.2327	12.1238	11.9772	11.6526	11.7803	11.9198	11.6736	11.8628	12.0077	12.1052	12.435	11.8709	11.8984	12.0282	12.4151	11.6756	12.067	12.2119	12.4187	12.0269	12.7875	12.2233	12.2664	12.0971	11.7883
TREA_HUMAN	O43280	Trehalase	2	2	0.199466	0.204966	0.864963	0.0706085	0	0			11.3106	11.1873		11.2268			10.9294								11.3533				10.7756	10.9178		10.9677										11.2332			11.4557
PIMT_HUMAN	Q99625	Protein-L-isoaspartate(D-aspartate) O-methyltransferase	5	5	0.876078	-0.0405436	0.657695	0.0710469	0	0	14.856	14.0633	14.1289	13.61	14.3405	15.2096	14.5107	14.3168	13.8719	13.6957	13.6016	13.8937	15.6034	14.9131	13.704	14.9059	14.2981	13.6014	13.8897	13.713	14.0329	13.8633	14.5326	14.0851	14.3948	13.5852	13.6674	14.0338	14.3373	13.9835	14.1214	14.389	13.8709	14.0059	14.9315	14.3961	14.0402	14.2228	13.4818
PROZ_HUMAN	P22891	Vitamin K-dependent protein Z	16	15	0.545715	0.105689	0.740031	0.0715811	0	0	12.7067	11.7568	12.9306	12.1182	11.3548	12.2315	12.9483	11.4029	12.5259	10.9368	12.1198	12.3853	13.0238	12.1022	12.4115		11.6662	11.3659	12.8338	12.6765	12.2142	11.7288	13.1215	12.5528	11.6491	11.9487	12.5541	12.8348	12.3913	12.492	12.2797		12.7767	13.0644	12.9081	12.531	12.2782	12.5742	13.1058
GFRA2_HUMAN	O00451	GDNF family receptor alpha-2	2	2	0.995876	-0.00880957	0.755946	0.0718992	0	0	11.9947	12.5608	11.5816	10.9911	11.7255	12.6432	10.3305	13.4366	12.7573	11.7938	12.3819	11.9292	11.9249	12.9291	12.1047	12.6029	12.9035	11.2173	11.7527	11.824	11.0584	13.0384	10.7296	12.7984	11.9475	12.3581	11.5764	12.6184	12.4391	12.4651	12.719	12.7334	12.3917	13.9208	12.2521	12.0748	12.4495	12.3254	12.3402
FLII_HUMAN	Q13045	Protein flightless-1 homolog	2	2	0.420172	0.166714	0.856255	0.0719522	0	0	10.7257	11.0725			11.0849			10.5964		10.5607	11.0393	10.9379	11.5465	11.4275	11.8496	11.1354	11.1373	11.277	12.4662	11.1474		11.4239		11.8982		11.0313	11.4811	11.148		12.0061				10.9942			10.2535	11.7663	11.4496
FAT4_HUMAN	Q6V0I7	Protocadherin Fat 4	2	1	0.891602	0.0551621	0.818957	0.0720101	0	0	11.5775	11.1681		10.9673		11.8509		11.3934	11.3659		11.8251									10.6123			11.6256			11.7885	10.2159	11.979	12.0753	10.9214		11.4416	11.4679	11.7456		11.2603	11.3854		10.1176
A2AP_HUMAN	P08697	Alpha-2-antiplasmin	53	53	0.794288	0.0282113	0.224749	0.0724141	0	0	18.8873	18.6691	18.7925	18.6027	18.6383	18.9552	18.8471	18.5604	18.6221	18.6659	18.6708	18.5794	19.1907	18.7467	18.7869	19.3197	19.2802	18.8136	18.7768	18.3342	18.6076	18.7853	18.4584	18.8283	18.8935	18.5525	18.5666	18.995	18.7048	19.0656	18.8488	19.1271	18.8009	18.8401	19.0514	17.2406	18.4606	19.1262	18.659
AOC3_HUMAN	Q16853	Membrane primary amine oxidase	6	3	0.918971	-0.0482664	0.799474	0.0728561	0	0	11.4992	10.1989	10.0514	10.1397		9.9325		10.7945		10.404	10.1895	11.0446		10.6787	11.4339		10.5971	10.7671	10.2556	11.869	10.7726	11.384	10.6402	12.1696	11.3345	11.0783	10.3598	10.5429	10.417	10.6622		11.428	10.8228	10.1089				10.4208	10.428
ARP3_HUMAN	P61158	Actin-related protein 3	11	10	0.582517	0.108063	0.775615	0.0734863	0	0		12.3592	11.7056	11.8322		12.623	12.2651	12.1144	12.1105					12.3685	11.8686		12.1497		12.5033	11.9912	11.2463	11.7685	12.0546	12.1921	12.1687		11.9659		12.7116	12.2367			12.2179	12.0932			12.2105	12.1482	12.6349
TSP2_HUMAN	P35442	Thrombospondin-2	4	1	0.579453	-0.108643	0.750436	0.0745111	0	0	10.561	10.4341	10.2475	9.84995	11.1504	11.0698	9.99876	10.8137	10.1288		10.3247		10.2224	10.6342	9.2826	10.9209	10.2493	10.1799	10.7036	9.70468		10.9421		11.0095	10.0643	11.0734			11.218		10.3991	11.2457	10.3101	10.2265		10.727	9.84253	10.2293	10.1358
CAZA1_HUMAN	P52907	F-actin-capping protein subunit alpha-1	3	2	0.13097	0.245433	0.808546	0.0754253	0	0	11.4997	11.6268	11.6951	11.3524	11.7215	11.412	10.973	11.8685	11.4417	10.7707		12.1263		13.13	11.7317	13.0221	12.1492	10.8518	11.4062	12.036	11.9452	12.8712		12.3587	11.1956	12.233		12.9491	11.233	11.6314	12.807	11.4078	10.7639	12.8427	11.653	11.4771	11.2095	11.2529	11.5651
TENN_HUMAN	Q9UQP3	Tenascin-N	6	6	0.774174	-0.0687372	0.703116	0.0761158	0	0			11.7509	11.7738	11.4091	12.1595	11.7923	11.7392	11.968	11.7898	11.4814	11.3974		11.4573	9.51551					11.4136	11.3897	11.2015		11.5936		11.6016	11.1641	11.2801	12.2504	11.9176	11.44	12.0582	12.0785	12.2669	11.8834	12.2454	11.7314	12.7804	11.4914
PTX3_HUMAN	P26022	Pentraxin-related protein PTX3	5	5	0.825475	0.230026	0.97868	0.0766423	0	0	10.8409					11.9081			11.9143				11.3837			13.3019	12.1396					5.33506		11.8776			12.6088			12.2803	11.4161		11.848		12.2956	11.7867	10.4455	11.278
F13A_HUMAN	P00488	Coagulation factor XIII A chain	45	44	0.957791	0.0163529	0.386708	0.0768563	0	0	17.3292	17.3858	16.855	16.5391	17.2464	16.885	16.6491	16.7729	16.7838	16.3528	17.0478	17.1277	17.0166	16.9462	16.9634	17.2274	16.8851	17.0105	16.8359	16.7156	16.7572	17.1358	16.5697	17.042	16.9093	16.6457	16.9226	16.487	17.3051	16.528	16.6685	17.068	17.4488	17.0139	17.3042	16.7889	16.8049	17.6267	16.8303
MBL2_HUMAN	P11226	Mannose-binding protein C	18	18	0.608287	-0.1001	0.732678	0.0769324	0	0	12.239	12.379	11.9543	12.6563	12.465	13.1773	11.8484	12.6235	12.1395	11.1369	13.1204	13.798	12.4157	11.4796	12.5371	12.8381	11.8849	11.167	12.234	12.359	13.0533	13.4647	12.0909	12.4227	13.1737	13.7774	11.7462	12.4769	13.1464	13.1813	12.5038	13.2272	12.5557	12.6587	12.6094	12.873	12.44	11.4802	13.2518
APOE_HUMAN	P02649	Apolipoprotein E	51	50	0.0139342	-0.386034	0.809115	0.0780941	-	0	18.0995	17.5291	16.5984	17.5568	16.8621	16.8233	16.1995	16.4724	17.4006	17.1358	16.4642	17.9907	17.5222	16.507	16.4207	17.0569	15.9931	18.6317	18.1417	16.9781	17.5654	17.3794	18.1056	17.8369	17.1903	17.9634	17.9389	15.9289	17.3634	17.9201	17.1016	19.2072	17.4024	16.3435	15.8173	16.9431	16.3948	17.7213	17.6086
PGRP2_HUMAN	Q96PD5	N-acetylmuramoyl-L-alanine amidase	25	25	0.247534	-0.146776	0.647281	0.0781967	0	0	17.6093	17.1283	16.1401	16.9039	16.5628	16.9002	16.8836	17.4334	16.1252	16.6006	16.3733	17.2974	17.0987	17.0935	16.8045	16.5144	16.5973	16.6878	16.8141	17.3083	17.1625	17.1238	16.2533	16.9684	15.6168	16.8771	17.0655	16.0204	16.9716	16.5032	16.1855	17.3488	16.5847	16.6353	16.6013	16.3316	16.4314	16.059	16.6388
AMPL_HUMAN	P28838	Cytosol aminopeptidase	3	3	0.444555	-0.249874	0.927189	0.0782845	0	0						10.7668																															10.7118
CO3_HUMAN	P01024	Complement C3	116	113	0.993372	0.00807239	0.530819	0.0783241	0	0	16.0364	16.1997	16.03	16.0428	15.6027	15.9571	15.1917	15.7074	16.1848	15.5552	16.4209	16.3218	15.9038	15.9853	15.8716	16.1685	15.8389	16.1749	16.328	16.0322	15.8081	16.5616	16.0322	16.389	15.8661	16.2889	15.8409	15.9619	16.1851	16.0442	15.8089	16.0697	15.9676	15.7891	16.2427	15.6222	15.8518	16.0431	15.7223
LAMB2_HUMAN	P55268	Laminin subunit beta-2	5	4	0.984477	-0.0385712	0.93723	0.0786372	0	0	9.22407		8.79209	9.90113			9.97562	10.1841	10.7181	12.2412	10.0425							11.7181	11.309			8.89567	9.40694		11.6788	10.5382			11.193			11.2362	10.2979				10.7838
OLFL3_HUMAN	Q9NRN5	Olfactomedin-like protein 3	4	4	0.778377	0.0435851	0.433921	0.078958	0	0	11.6919	12.3456	10.4692	12.5023	12.0435	12.6223	11.6505	11.3165	11.8807	11.355	11.6073	12.2876	12.1202	12.0712	12.0881	12.4852	11.7876	11.7532	11.8891	11.9453	11.6938	11.8081	10.9899	11.6837	12.1509	11.539	11.2335	11.737	11.9917	12.0944	11.65	12.2913	11.1652	12.0795	12.0373	11.7382	11.7923	11.801	11.5756
MMP2_HUMAN	P08253	72 kDa type IV collagenase	9	8	0.762512	0.0507146	0.460333	0.079938	0	0	11.8447	11.2759	11.5276	11.9355	11.225	11.5663		11.4831	11.7489	11.0316	10.8029		11.9513	11.4729	11.9626	11.548	11.6568	11.0706	11.3068	11.617	10.7461	12.0773	11.6226	11.3158		11.3955	11.3805	11.3857	11.9331	12.1508	11.3401	11.8047	11.76	11.6549	11.8094	11.3193	11.3716	11.9361	11.2879
CSF1R_HUMAN	P07333	Macrophage colony-stimulating factor 1 receptor	12	12	0.875444	0.0377638	0.54709	0.0801911	0	0	12.8877	12.8729	12.1069	13.071	11.5568	12.4068	11.8407	12.5985	12.1816	12.7719	12.992	12.3205	12.2068	12.4245	13.0447	13.2991	12.0649	12.8624	12.0566	13.2333	12.3389	13.2871	12.7133	12.4627	12.9003	13.6019	12.9331	12.9663	13.0107	11.9338	12.6244	12.9136	12.6095	12.1403	13.3677	12.2363	12.1275	12.6342	12.6704
L1CAM_HUMAN	P32004	Neural cell adhesion molecule L1	10	10	0.577128	-0.110291	0.728305	0.0812816	0	0	15.6844	15.7468	15.306	15.6097	15.2608	15.6316	13.8603	15.531	15.3715	15.6862	15.3353	16.2539	15.7775	15.1952	15.0986	14.9565	15.271	17.1896	16.255	14.2378	16.1461	15.6078	16.65	16.3082	16.0323	16.1849	15.8933	14.6888	16.2025	15.965	15.9963	17.6493	15.79	15.8659	15.1902	15.5558	14.521	16.4172	15.832
PIPNB_HUMAN	P48739	Phosphatidylinositol transfer protein beta isoform	2	2	0.913715	0.0234611	0.313953	0.081576	0	0	10.9645	11.2377	11.1219	11.2069	11.312	11.2237	10.6659			11.1573	11.2155	11.0485		11.2129	11.636	11.7203	11.1588	11.0069	11.6901	11.1265	11.138	11.0382	10.8914	11.2276	11.8156	11.4652	10.7746	11.0447	11.3135	11.2118		11.134	11.17	11.0766	11.3159	11.065	11.5083	11.4285	10.9688
TRI51_HUMAN	Q9BSJ1	Tripartite motif-containing protein 51	2	1	0.363716	0.238326	0.885698	0.0823364	0	0		11.2958		10.5578				12.3601	12.1701	10.1713	11.2005			10.7357	10.7464			11.242	10.2058	10.2938	11.408			10.8935	10.8814	11.7196			12.1527	10.8764			10.6092	11.1865		11.8012	11.9979
PRG2_HUMAN	P13727	Bone marrow proteoglycan	17	17	0.388116	0.214547	0.858377	0.0823974	0	0	17.4475	18.4537	16.0631	17.4659	17.2105	16.8597	16.7477	18.3265	16.6893	16.0841	15.6874	16.6223	17.0294	18.2526	16.1535	16.0942	17.6232	16.8813	18.0052	17.9131	17.3175	17.9988	17.5073	16.9919	18.9568	18.0137	18.1551	17.682	18.7782	15.2605	16.1703	17.5245	17.383	16.165	18.3579	16.9773	16.7775	17.0655	17.875
ENPP2_HUMAN	Q9UCR1	Ectonucleotide pyrophosphatase/phosphodiesterase family member 2	39	37	0.982883	0.0145718	0.568033	0.0827416	0	0	12.2513	12.3143	11.4541	11.6616	11.8379	12.1624	11.4182	11.7174	12.0146	11.3563	12.9484	12.7718	12.5867	11.8648	12.5991	12.3126	11.64	13.0874	12.5591	13.1487	12.2271	12.7953	12.7454	12.0202	12.1501	13.6243	13.2723	12.1145	12.6378	12.8859	12.3673	13.4054	12.362	12.0762	12.1535	11.5832	11.8687	12.2476	11.9695
PTPRB_HUMAN	P23467	Receptor-type tyrosine-protein phosphatase beta	2	2	0.518107	0.086348	0.529896	0.0828551	0	0	13.7915	14.245	14.4087	14.6572	14.674	15.2	13.7426	14.8569	14.9919	15.0508	14.6538	14.7661	14.0056	15.25	14.7165	14.3343	14.839	15.2376	15.2795	14.6225	14.8547	13.5046	14.6316	15.2855	15.6516	15.1362	14.8585	14.5725	14.6924	15.212	15.1349	14.7427	15.2017	14.931	14.5697	14.6637	15.3895	14.9225	14.7129
TCO1_HUMAN	P20061	Transcobalamin-1	2	2	0.549213	-0.0759067	0.473078	0.0831491	0	0	11.5988	11.5583	11.5092	10.9808	11.1884	11.7068	11.0213	10.7984	11.2252	12.057	10.9869	11.1113	10.5855	11.8133	12.0043	11.5693	10.8888	11.8366	11.8572	12.1371	11.8698	10.8521	11.3188	11.7323	12.2298	11.3021	11.3704	11.4174	11.5696	11.1106	11.1207	11.3302	11.381	11.9927	11.251	11.279	11.2216	11.2684	11.1142
G6PE_HUMAN	O95479	GDH/6PGL endoplasmic bifunctional protein	11	11	0.738889	-0.0533275	0.448749	0.0835365	0	0	11.9303	12.321	12.0051	11.6558	12.1977	12.3607	12.2336	11.547	12.0425	11.6689	12.9634	11.9207	12.0809	12.3119	12.115	12.6523	12.8412	12.0442	12.4919	12.2169	11.5607	13.0417	11.696	12.0317	11.8819	12.3684	11.8925	11.9701	12.7534			12.4992	12.5264		12.5793	12.7574	12.1773		12.6407
R4RL2_HUMAN	Q86UN3	Reticulon-4 receptor-like 2	4	4	0.99279	-0.00798237	0.449649	0.0837752	0	0	13.6774	14.1143	13.2035	13.2977	13.5124	13.3988	12.5747	13.1819	13.9009	13.0104	13.0057	13.6208	13.65	13.7274	13.6579	13.8688	13.332	13.194	13.3097	13.3408	13.1273	13.7533	13.2573	13.7876	13.6092	14.1517	12.7383	13.7836	13.8098	13.7462	13.7074	13.8593	14.3087	13.8478	13.2243	12.9114	13.6934	14.2397	13.7857
SEM7A_HUMAN	O75326	Semaphorin-7A	13	13	0.956567	-0.0278229	0.648204	0.0842198	0	0	12.0739	11.8938	11.7961	12.2226	12.426	11.8438		12.2306	12.0946		13.095	12.5273	12.6148	11.8582	10.7944	12.0481	12.1678	12.4611		11.93	11.2912		11.7649	12.2798	12.7594	12.7892	10.593	11.8508	12.9053	11.8414	11.334	12.9495	12.0201	13.1824	12.8101	12.0605	12.6931	12.3541	11.5505
PROS_HUMAN	P07225	Vitamin K-dependent protein S	39	39	0.769427	0.0439058	0.377544	0.0842609	0	0	13.0809	12.4023	12.2273	12.4168	12.1435	12.5474	12.0045	13.0789	13.1464	12.3476	13.0561	12.4865	13.4456	12.5195	12.4077	13.0081	12.308	12.118	12.596	12.59	12.6328	12.614	12.551	12.5227	12.3485	13.1113	12.7809	12.3218	13.3492	12.603	12.3406	12.9536	12.4619	12.5948	13.2671	13.0683	12.9974	12.4129	12.6263
APOD_HUMAN	P05090	Apolipoprotein D	10	10	0.496872	-0.138935	0.746613	0.0843893	0	0	11.9414	12.0507		11.9545	11.7838	11.6465		11.008	11.9542	11.6095	12.3622	11.3441			11.4604	11.4482		12.0937	11.8235	11.8283	11.8081		11.8934	11.2607		12.391	11.9509		12.5064	11.5832	11.5783	13.1092	11.6829				12.2085		12.3462
HEXA_HUMAN	P06865	Beta-hexosaminidase subunit alpha	6	5	0.0861923	0.191625	0.568127	0.0864756	0	0	11.1414	12.0033	11.3687	11.4034	11.3397	11.2944	10.3762	12.2818	12.5724	11.0673	11.9995	11.6264	11.8965	11.399	11.3028	12.2711	11.5401	11.3455	11.4332	11.0272	11.4132	11.3407	11.0584	11.8797	12.0263	12.4035	11.3057	11.9943	12.3079	12.1224	12.6164	12.1954	11.9201	12.4713	12.2281	10.5919	12.4141	11.9312	11.8715
PMGE_HUMAN	P07738	Bisphosphoglycerate mutase	8	8	0.827139	-0.0587191	0.66898	0.0868225	0	0	12.9017	12.3851	13.2516	12.6291	12.2383	12.6768	11.7447	12.0498	11.8728	12.027		12.609		12.2781	12.6361	13.4144	12.1726	12.9591		12.7387				12.7763	13.1372	12.4426	12.3636	12.3178	11.6171		12.4223	13.1108	13.0547	12.2352		11.7418		12.3405	12.2098
PLEK_HUMAN	P08567	Pleckstrin	9	9	0.367752	-0.407635	0.938609	0.087543	0	0		10.4224	10.0346			10.5926			10.3452						8.70515					11.0569		11.0297					10.8038					12.0532	11.1974	11.2321
GDIR2_HUMAN	P52566	Rho GDP-dissociation inhibitor 2	13	13	0.244063	0.10709	0.359855	0.0883429	0	0	13.2134	13.3013	13.7125	13.1229	13.4544	13.6334	12.7435	13.5821	13.0391	13.1973	12.8081	13.9328	13.8137	13.2544	13.553	13.5632	13.6933	13.4266	13.5815	13.9312	13.9858	13.4837	13.5919	13.1613	13.7695	14.1959	13.1325	13.6682	13.6173	13.5124	13.5249	13.8197	13.894	13.4075	13.8948	13.0479	13.383	13.9008	13.2598
TYPH_HUMAN	P19971	Thymidine phosphorylase	7	7	0.468436	-0.306677	0.906148	0.0887893	0	0			10.9899	11.7114		11.2946				11.4429	12.7958			9.62295	13.0705	11.9622						12.0067	11.831			12.4908			11.667			11.8795		11.2283
DIAP1_HUMAN	O60610	Protein diaphanous homolog 1	3	3	0.138493	0.310107	0.907834	0.0895874	0	0		11.7743			11.2333				10.663								10.8529					10.8601												11.6381
GPX1_HUMAN	P07203	Glutathione peroxidase 1	2	2	0.862668	-0.0930766	0.834073	0.0898756	0	0		9.87741		9.88296					10.0325	9.93987				10.0014						10.4391				9.53815										9.6042				10.3166
KMT2C_HUMAN	Q8NEZ4	Histone-lysine N-methyltransferase 2C	4	4	0.939881	-0.0742942	0.927936	0.0904926	0	0	12.2729			10.7127		10.627		12.3821		10.6298	12.2814			11.6921	12.7396					12.9554		13.392	10.5816	12.0826	12.5928	12.0334	11.7522	12.5219	12.5309	10.6531		12.9819	12.6188	11.5021	12.5077		10.5887	12.5049	11.1825
ENTP5_HUMAN	O75356	Ectonucleoside triphosphate diphosphohydrolase 5	2	2	0.997325	-0.0121243	0.844333	0.0909367	0	0	13.3757	11.0088	13.0698	9.84593	12.7003			12.807					12.4693	12.3919	13.0904		12.7664	12.6101	12.6137	14.3627	13.1092		11.8585	13.2455	13.3418	14.0219	10.9992	11.9804	12.7438	10.7523	12.5389	13.8702	12.1602			11.243	12.9319	12.084	10.676
PITH1_HUMAN	Q9GZP4	PITH domain-containing protein 1	2	2	0.0538762	0.337387	0.798001	0.0923985	0	0		11.0685					9.62554	10.344		10.1581	11.8236		10.583		9.88796		10.2983	9.35669		10.4173	9.43895		10.4781	10.6547	10.3517	11.2164	10.3048	10.4054	10.5064	10.7542	9.73885		11.6559	10.2054	10.7598		10.538	10.4694
COR1C_HUMAN	Q9ULV4	Coronin-1C	7	6	0.331242	0.0981046	0.350578	0.0932703	0	0	18.7741	19.4379	19.6873	18.7184	19.69	19.1273	19.3505	18.9777	19.1888	19.219	19.146	19.0918	18.6545	18.8479	19.1603	19.4758	19.1983	19.6755	20.0686	18.8001	19.4351	19.5822	19.4285	18.7567	20.3421	19.9501	19.0784	19.0962	19.8903	19.1495	19.1482	19.3441	19.2132	18.889	19.7042	19.5038	19.0644	19.3804	18.9391
CHAD_HUMAN	O15335	Chondroadherin	3	3	0.999369	-0.00600825	0.842011	0.0935697	0	0		10.9414				10.3639		11.4981						11.408							10.6956	11.1648	10.8689		11.8046	10.684	11.1418		10.9805						11.7706		11.4066
CILP2_HUMAN	Q8IUL8	Cartilage intermediate layer protein 2	4	4	0.351591	0.123752	0.527302	0.0942127	0	0	10.4627	11.0834	10.9727	10.8746	10.2528	11.2541		11.3446	11.1268	10.6603		11.131			11.2041	11.3977	10.758	10.9623	10.9117	10.2928		11.107	10.8802	10.5859	10.7295	10.8665	11.3287	11.272	10.9782	11.0106	10.713	11.4748	10.0637	10.64	10.9621	10.7993	10.3676	10.5049	10.8603
TETN_HUMAN	P05452	Tetranectin	16	16	0.381943	0.0731619	0.196404	0.0943697	0	0	15.4863	15.384	15.2719	15.5617	15.4932	15.6671	15.2828	15.9018	14.8181	14.9183	15.4586	15.3881	15.8815	15.6746	15.5134	14.9229	15.4689	15.5411	15.5722	15.8217	15.3227	15.3185	15.5267	15.3545	15.6162	15.1903	15.237	15.6565	15.1671	15.382	15.6761	15.6935	16.1812	15.4338	15.621	15.7106	15.1673	15.4135	15.4292
PDIA6_HUMAN	Q15084	Protein disulfide-isomerase A6	4	4	0.00815079	0.0252059	0.53068	0.0957324	--	0		10.4916	10.3141	10.2264	10.4549	10.6648	9.67359			9.48098					10.0163		10.3201	10.1041		10.2033	10.0823	10.5424	10.3245	9.7009	10.9981		10.3951	10.4544		10.4388	9.30872		10.4314		10.9503	9.97043		9.99291	10.34
HEXB_HUMAN	P07686	Beta-hexosaminidase subunit beta	9	8	0.970849	0.0235539	0.611131	0.0957784	0	0	14.1456	13.2593	12.803	13.3146	12.9158	12.8825	13.5159	12.8296	13.18	13.5892	11.5056	13.1562	11.724	13.8068	13.7197	13.5563	12.8554	12.9107	13.3204	13.6048	13.2134	12.7707	13.6005	13.3196	13.3672	12.5513	13.4549	13.5167	13.5299	13.2788	13.5335	13.9005	13.1244	13.0828	14.0222	13.3325	13.1891	13.2171	13.2054
ATD3B_HUMAN	Q5T9A4	ATPase family AAA domain-containing protein 3B	2	2	0.606194	-0.377035	0.970398	0.0960702	0	0												12.7788				13.0221							10.3813														12.2294	12.358
EGLN_HUMAN	P17813	Endoglin	13	13	0.0617865	0.336203	0.759661	0.0978154	0	0	12.234	13.0325	11.6914	13.0305	13.0129	13.1965	11.9779	13.0231	12.0625	12.8514	12.8866	12.5061	12.6687	11.8305	13.0469	12.5391	13.1821	12.6819	13.1913	12.7812	12.0901	12.6718	12.4372	14.0184	11.2824	13.8473	12.3081	11.5398	13.6482	12.0652	10.5187	12.8733	14.3042	13.0833	12.0397	13.7535	13.4904	12.8861	12.3648
K2C7_HUMAN	P08729	Keratin, type II cytoskeletal 7	5	2	0.488505	0.3117	0.921117	0.100144	0	0	18.6659	18.0106	18.4803	17.6331	17.0731	15.0099	17.5052			17.6792	19.2	18.1171	18.2901	18.3869	17.013	19.0426	18.2253	14.576	17.7391	16.7554	17.4342	19.2027	18.6377	16.6279	16.0148	17.6273	18.9078	18.6177	17.4096	19.0498	16.4932	19.1299	18.4679	17.3288	19.1131	18.1522	15.9973	18.6848	17.6725
TARSH_HUMAN	Q7Z7G0	Target of Nesh-SH3	7	7	0.984158	0.0844866	0.979405	0.100948	0	0			12.8292	15.9762		17.8602		16.1317		16.9108			16.0009		10.522		12.0279		17.8163	17.6203	11.6058			17.998	17.6209	12.5674		14.8686	13.6582			16.1907		16.7635			13.7206
PI16_HUMAN	Q6UXB8	Peptidase inhibitor 16	12	12	0.960153	0.0237744	0.443009	0.101008	0	0	11.7162	10.8556	10.4878	11.4655		11.5805	11.5017	12.2697	11.1288	10.7048	11.9887	10.7505	11.7042	10.7335	10.9217					10.8902	10.7235	11.674	11.0692	11.2611	11.203	11.8052	10.8844	11.5324	11.3124	11.5168	11.1023		11.781	11.4087	11.3671	11.4837		11.5331	11.1036
PAK2_HUMAN	Q13177	Serine/threonine-protein kinase PAK 2	2	1	0.00741676	0.776786	0.902356	0.101063	+	0		14.2389		10.8573	11.5889		11.38	14.2283	11.4449	12.8264	14.3994	13.0751	13.058	13.4944		12.1231	13.3802	12.3794	15.1147		12.2133	12.9491	13.1515	15.1629	11.8382			13.6177	13.7973	13.1616	12.9532	11.6818	16.4201	14.259	13.21	11.4236		13.1487	11.1467
LIRA3_HUMAN	Q8NHJ2	Leukocyte immunoglobulin-like receptor subfamily A member 3	3	3	0.637843	0.162837	0.822439	0.102625	0	0	11.3101	11.328	10.681	10.8646						10.4216												10.914	10.871	11.178			9.91939							11.2808		11.5168	10.7368
KAPCA_HUMAN	P17612	cAMP-dependent protein kinase catalytic subunit alpha	2	1	0.999918	-0.000882126	0.300944	0.104111	0	0		10.6228	10.8509	11.1989	10.8313	11.076		10.1269	10.1942	10.9293		11.0779	11.3953	10.9217	10.8872	11.1648		11.0921	10.9774	10.5487	10.4947	10.7152	10.7147	10.667	10.7505		10.7609	10.8438		11.0484	11.5453		11.0788	10.712	11.1793	10.7798		11.3041	10.8505
SH3L3_HUMAN	Q9H299	SH3 domain-binding glutamic acid-rich-like protein 3	4	4	0.452365	0.18973	0.0163224	0.104649	0	--	11.7821	13.4637	13.0591	12.3284	12.4935	12.6924	10.0255	11.4546	13.2551		11.7463	11.8539		11.579		12.8772	12.0483	12.0249		12.3823	11.2386		11.9368				10.5758			11.6771		12.3733	12.3173	13.9086	12.6874	11.6841		11.5836
PEPD_HUMAN	Q8TBN9	Xaa-Pro dipeptidase	11	11	0.26585	-0.136008	0.390702	0.105062	0	0	10.933	11.2858	11.9537	11.3458	11.1884	11.9193	11.9528	10.9204		11.7428	11.8707	11.4056	11.579	11.3519	11.4948	12.081	12.2277	11.6026	11.5587	11.613	11.3955	11.5091	11.1992	11.4592	11.78	10.6839	11.1934	12.1122		11.6122	11.3342	12.1328	11.724	12.1264		11.8564	11.2847	11.4613	11.1475
Z658B_HUMAN	Q4V348	Zinc finger protein 658B	2	2	0.388454	0.117247	0.548978	0.105601	0	0								9.66714	9.81665	9.90618	10.6523		11.2118	10.4353	10.4647		10.4551	10.175		10.401	9.8629		10.3481	9.94756			9.88667				10.3204		10.2524	10.2126		10.2048
NECT3_HUMAN	NECT3_HUMAN	NECT3_HUMAN	5	5	0.826397	-0.0894606	0.710773	0.106384	0	0	12.538		11.3675	12.2501	12.0349	12.0414	11.0763	12.0567	12.8011	12.864	13.0941			12.2329	11.5288		11.3859	13.0308	13.0222	11.8581	11.7138	11.8376		11.367	12.112	13.5638	12.3673	11.8367	13.4759	12.6195	12.1653	14.3637	12.0296	12.5119	11.6203	12.8731	12.6761	12.9323	12.3811
NRX2A_HUMAN	Q9P2S2	Neurexin-2	2	2	0.857366	0.101298	0.870889	0.106924	0	0		10.5941												10.2027	9.95733				10.6293			9.9697		10.0094									10.5553
GDIA_HUMAN	P31150	Rab GDP dissociation inhibitor alpha	7	3	0.323069	0.132934	0.434673	0.108341	0	0	12.5423		12.4459	12.2152		12.4484	11.7658	13.2989	13.063	12.3322	11.6496	13.3157		13.1115		13.2654		12.2615	13.1883		13.2864		11.4747	13.5736		12.6728	12.2388	13.1749	12.7435	12.1052	12.4562	12.7027	13.3167	13.2579	12.2825	12.854	12.1074	13.2235	12.8557
AT2A3_HUMAN	Q6JHX1	Sarcoplasmic/endoplasmic reticulum calcium ATPase 3	2	2	0.975015	-0.051855	0.907716	0.108474	0	0		12.0903																10.5497					10.237	10.2488										10.9912
FIBG_HUMAN	Q9UC63	Fibrinogen gamma chain	47	47	0.158702	0.245559	0.668313	0.108618	0	0	14.8223	15.1017	14.3301	15.1624	13.6938	13.181	13.9137	15.4309	15.8089	14.1893	15.0892	14.3939	14.5276	14.1317	14.6453	14.4819	13.5382	15.1854	14.1514	13.8699	15.3765	14.7316	13.9907	14.559	14.5703	14.9632	14.6831	13.6006	15.9229	14.9532	14.081	13.5621	14.8571	14.4406	14.9178	16.0864	15.6668	14.3329	14.525
SODC_HUMAN	Q6NR85	Superoxide dismutase [Cu-Zn]	4	4	0.937082	0.072749	0.856832	0.108728	0	0						12.1068		10.9334	11.1406						11.2764		11.4527			12.056		11.89	11.1286			11.094	10.947			11.4012								12.728
CBPA1_HUMAN	P15085	Carboxypeptidase A1	2	2	0.980327	-0.0146104	0.335003	0.108988	0	0	14.6355	14.6944	14.4851	15.0868	14.341	14.8749	14.1416	15.2664	15.2071	14.8503	15.1802	15.1273	15.0445	15.6901	15.2432	15.3478	15.3415	15.0784	15.0328	14.5882	14.8729	13.3857	13.8177	15.272	15.5403	14.969	14.9514	14.9548	15.4051	15.0944	15.0306	15.089	15.0871	15.247	14.9732	13.2471	14.7496	15.4706	14.467
ASGR2_HUMAN	P07307	Asialoglycoprotein receptor 2	2	2	0.742201		0.182665	0.109327	0	0
PLIN3_HUMAN	O60664	Perilipin-3	5	5	0.917454	0.0375797	0.476117	0.10954	0	0	15.0206	14.2516	13.699	14.4567	13.9001	14.3989	11.2707	14.4302	14.6407	14.4779	14.4042	14.9262	14.8822	14.6858	13.8135	14.5167	14.0321	15.0538	14.7719	14.5305	14.2874	14.2436	14.0889	14.8058	14.407	15.7386	14.1126	13.8207	14.7848	14.4185	14.4986	15.3472	14.8517	14.7945	14.8668	14.0916	14.287	14.6556	14.4954
NDKA_HUMAN	P15531	Nucleoside diphosphate kinase A	5	2	0.298114	-0.288941	0.780437	0.11003	0	0	10.6575	10.8988		10.1668		10.4044		10.9798	11.1215		10.2404			11.4016		11.2626								10.3421		11.3328			11.0618				11.3987				10.7991	11.3158	11.2914
COR1B_HUMAN	Q9BR76	Coronin-1B	4	4	0.853292	0.0752753	0.690035	0.110819	0	0	12.5034	11.9127	11.0923	12.1411	11.4586	11.7079	11.075		11.968	11.9949	12.1448	11.4374		11.6585	11.4123	11.8843		11.7566	11.6968	10.9646	11.3878	11.9364	11.9638	11.5791		12.2061	11.6637	11.8064	5.00528	12.0288	11.8603	11.7096	12.0046			11.8534	12.3985	12.3174
MYG_HUMAN	P02144	Myoglobin	3	3	0.343976	0.619955	0.730494	0.11109	0	0				10.8901																								11.7105
ACLY_HUMAN	P53396	ATP-citrate synthase	3	3	0.397394	-0.0862079	0.203668	0.111448	0	0	12.7837	12.0653	12.5872	12.8277	12.033	13.2487	12.026	11.9267	12.2368	12.5286	11.8225	12.2373	12.3296	12.2914	12.1432	11.7275	13.0891	12.2094	11.872	11.9587	12.5808	11.5132	12.581	11.9058	12.3064	12.3879	12.2854	12.7499	12.3409	12.1088	12.3019	12.4008	12.1929	12.6562	12.6318	12.3747	12.2008	12.345	12.1365
NAR4_HUMAN	Q93070	Ecto-ADP-ribosyltransferase 4	3	2	0.36112	-0.78896	0.296136	0.111827	0	0																					13.5485
NBPF7_HUMAN	P0C2Y1	Putative neuroblastoma breakpoint family member 7	2	1	0.562689	0.10636	0.541468	0.111972	0	0		10.5861	10.4622	9.72412	10.0808	10.4855	9.70076	9.88258	9.62386	8.88693	10.4239				9.93974		10.6802	10.0975	10.8724	10.3409	10.1319	10.159			10.3398		9.49239		10.4114	10.7663					10.5168	9.86921	10.4504		9.70898
UROM_HUMAN	P07911	Uromodulin	5	5	0.910703	0.0271464	0.193069	0.112205	0	0	11.7702		10.9767	11.4825			11.1895				11.686			11.8653	11.5961					11.8123	11.4567	11.3269	12.0953	11.604		12.0583	11.7996		12.0089	11.6165			11.617	11.3753			11.4675
MARE1_HUMAN	Q15691	Microtubule-associated protein RP/EB family member 1	2	2	0.956441	-0.0417296	0.681832	0.112895	0	0	12.4049			10.9832	11.6041			12.8746									12.4363										11.2816				12.0098	12.2685			11.9482			12.5593	12.0632
FGL1_HUMAN	Q08830	Fibrinogen-like protein 1	8	8	0.633194	-0.123573	0.650822	0.112931	0	0	11.5597	12.1556	11.238	11.5953	11.0605	11.2422		10.7324	11.4274	11.2615	11.1161	11.9963	10.6907	11.2632	11.0041	11.2255	10.8677	11.7158	12.1811	10.5258	10.6283	11.0557	11.636	11.9018	11.5654	12.4945	12.0988		12.0721	11.74		13.6347	11.5197	12.2994		11.2638	10.428	11.9485	12.3678
GPX3_HUMAN	P22352	Glutathione peroxidase 3	16	13	0.472791	-0.0729342	0.164176	0.113338	0	0	14.9654	14.2854	14.576	14.6872	14.2495	14.9606	13.6885	14.7137	15.1382	14.6253	14.7573	14.3513	13.8044	13.9071	14.6819	14.3446	14.5097	14.5424	14.8256	14.8451	14.539	14.8678	14.6423	15.0006	14.2591	14.7568	14.9798	14.6398	14.4623	14.733	14.8716	14.56	15.2611	14.3679	14.8403	14.9721	14.9961	14.9392	14.8336
LAMP2_HUMAN	P13473	Lysosome-associated membrane glycoprotein 2	5	5	0.996554	-0.00938598	0.602138	0.114482	0	0	10.1704		10.8257	11.2981	10.622	12.2036	10.0858	11.1379	11.0444	10.7747	11.0884	11.2494		10.5187	11.1252			10.7867	12.0778	11.7105	10.7417	9.95161	11.8621	11.4236	9.59213	11.8319	11.4748		11.9598	9.15337	10.9441	11.026	11.8293	11.7211		11.0616	11.3527		11.2595
IQGA1_HUMAN	P46940	Ras GTPase-activating-like protein IQGAP1	4	4	0.652086	0.285546	0.917628	0.115026	0	0																11.3968
PPIA_HUMAN	Q9UC61	Peptidyl-prolyl cis-trans isomerase A	16	12	0.534724	0.0832597	0.290368	0.116067	0	0	16.4048	16.9098	16.7547	16.4882	16.2541	16.1716	15.9159	16.102	15.6393	15.4575	15.7609	16.0854	15.6659	15.9295	16.0464	15.7497	16.0428	15.4703	16.0017	16.682	15.957	16.4557	15.8869	15.8094	16.7405	16.57	15.8947	16.2491	15.4912	16.1241	15.6545	16.2622	16.2448	16.3391	16.5159	15.7616	15.6637	16.5897	16.1127
HPSE_HUMAN	Q9Y251	Heparanase	3	3	0.446321	0.186339	0.0236109	0.116098	0	--	10.9286	11.3578	10.9114		10.7727		10.6512	10.485	10.8784		11.0212					10.8569						10.9771				11.2663			11.0156				10.538	10.7237	10.9329	10.4712			10.7678
APOL1_HUMAN	Q96PM4	Apolipoprotein L1	17	17	0.999285	-0.0035453	0.42592	0.120436	0	0	12.8215	13.2383	12.9232	12.3092	13.2141	12.7428	11.9709	12.6604	13.0174	12.5323	12.6905	12.9865	12.7994	12.848	12.4969		12.2772	13.1452	13.0006	12.5363	12.4285	12.998	12.8855	12.7515	13.1022	13.2975	13.3336		12.52	13.0496	12.8987	14.1974	13.0437	12.7449	12.9238	13.1281	12.9868	13.1696	12.7122
ITB1_HUMAN	Q8WUM6	Integrin beta-1	5	5	0.624683	0.0758033	0.294187	0.120707	0	0	12.7759	12.1837	11.8861	11.8296	12.6454	12.7318	11.5835	12.9321	12.4718	11.8348	11.8485	12.5319	12.5266	12.4394	12.1593	12.9055	12.207	11.7606	12.1969	12.4719	12.355	12.1738	11.7429	12.8464	11.937	12.7825	11.9447	13.105	12.2474	12.3548	12.6104	12.4588	12.4519	14.1659	12.4213	12.7563	11.9745	12.6534	12.3696
CD166_HUMAN	Q13740	CD166 antigen	4	4	0.811653	-0.0801675	0.624807	0.121301	0	0		12.0609	11.8791	11.4385		12.3238		10.8346		11.0718	11.5176		10.9092		11.9124	11.8614	11.8276	11.8784	11.7106	11.5813		11.7794		11.5839	12.3325	11.7021	11.349		11.0814	12.1652		12.8462		11.7969					12.2597
C4BPA_HUMAN	P04003	C4b-binding protein alpha chain	48	48	0.412725	0.217895	0.741237	0.121896	0	0	14.339	12.6705	14.4176	14.7749	13.002	14.09	14.5392	14.9838	15.6365	12.2192	14.4798	14.7201	15.9948	12.1319	12.8254	15.2989	13.7889	12.8511	13.5	13.2972	14.5456	14.6913	14.3313	13.9145	12.9778	14.8319	14.2517	13.7137	15.8547	14.5749	13.8668	13.9452	14.5682	13.7746	15.7455	16.8471	15.1417	14.4585	13.8422
IPSP_HUMAN	P05154	Plasma serine protease inhibitor	15	14	0.933156	0.0946115	8.28e-05	0.123245	0	++					10.7553	11.5025	9.40115				11.0974			12.4419		10.8229	11.763																			10.0355		11.9092
SEM3F_HUMAN	Q13275	Semaphorin-3F	4	4	0.407199	0.122508	0.386645	0.123281	0	0	15.7597	15.8284	14.9377	15.2657	15.2299	14.8353	15.2216	14.5515	15.1126	15.4372	15.5066	15.0476	15.4617	15.5185	14.9288	16.2695	15.0783	15.1137	15.4471	15.2497	14.3881	14.4802	15.4393	15.1224	15.563	15.0009	14.7161	15.7125	15.4763	15.2325	15.2908	15.2997	15.3449	15.4744	15.879	15.9465	15.2346	15.8675	14.8807
LDHB_HUMAN	P07195	L-lactate dehydrogenase B chain	12	11	0.922625	0.0229034	0.0944803	0.12758	0	0	17.4129	17.747	17.5116	17.2097	16.6825	17.5824	16.7572	17.1058	17.5937	17.1383	17.6113	17.6773	16.6448	17.0733	16.8727	17.1217	17.2814	16.9256	16.924	17.2473	16.6988	17.5167	16.9825	17.3512	17.5797	17.7749	16.7519	17.2213	17.6133	17.1357	17.6191	17.6196	17.6682	18.1378	17.7254	16.9166	17.373	17.5208	17.0875
ARPC5_HUMAN	O15511	Actin-related protein 2/3 complex subunit 5	6	6	0.751665	0.0928257	0.584753	0.128274	0	0	10.9938	11.4253	10.8441	10.8457		11.0307			10.6189	10.5453		11.7452	11.8242									11.2978		10.5961	12.4562	11.4079	10.6365		11.2839							10.6561
MICA2_HUMAN	O94851	Protein-methionine sulfoxide oxidase MICAL2	2	1	0.0870971		0.66951	0.128862	0	0									10.1752																								10.5057
NOE2_HUMAN	O95897	Noelin-2	4	4	0.212629	0.160037	0.338061	0.129628	0	0	16.6233	16.6733	16.2195	15.6521	16.8757	16.4855	15.5898	17.3077	16.9172	16.4594	16.1713	16.3477	16.2099	16.7602	15.7755	16.8644	16.6888	16.489	16.6044	15.3604	16.3019	16.8066	14.9826	16.9255	15.9465	16.5282	15.2395	16.8098	16.4035	16.5557	16.8511	16.9271	16.711	17.7989	15.5901	16.4494	16.012	16.4501	16.8704
KPYM_HUMAN	Q96E76	Pyruvate kinase PKM	30	28	0.988485	-0.0149799	0.417266	0.130179	0	0	16.6913	17.1426	17.775	17.5051	17.4826	17.6565	16.6044	16.7673	17.0288	17.4939	17.6302	17.6407	17.4702	16.5106	16.8829	16.792	16.6833	17.0259	17.5699	17.0519	16.8341	16.9347	16.5194	14.2125	16.984	17.8494	16.1285	17.5452	18.0425	16.7595	17.3453	17.5211	16.9845	16.7148	16.8183	17.2434	14.2106	17.0265	16.6197
HGFL_HUMAN	P26927	Hepatocyte growth factor-like protein	39	25	0.979442	0.0121463	0.0919601	0.13428	0	0	13.4044	13.0428	11.6814	13.1924	13.2608	13.2693	12.8066	13.1477	13.4249	13.0877	13.6676	12.939	12.7359	12.3546	13.3453	12.3886	12.2052	12.9237	12.9532	13.5063	12.2906	13.2986	13.0465	12.8989	13.0877	13.4104	13.1611	12.8864	13.7358	13.1685	12.935	13.5238	13.4425	13.324	13.4996	13.0584	12.9033	12.3381	13.1426
EF2_HUMAN	P13639	Elongation factor 2	6	6	0.172325	0.812925	0.963661	0.134302	0	0						11.1714		10.4073
CAPZB_HUMAN	P47756	F-actin-capping protein subunit beta	2	2	0.906112	0.0342314	0.213502	0.135224	0	0		11.1011	11.1451	10.8237	11.2356	11.6694		10.651	10.9324	10.5575	10.2344			11.3593	10.5343	11.5217	10.9818	10.6181	11.1072		10.6227	11.0969		10.7405		10.5755	10.6531	10.8966	10.8932	11.1959	11.1449	10.8498	11.1032	11.3111		10.7716	11.348		11.2044
SPRL1_HUMAN	Q14515	SPARC-like protein 1	13	13	0.865556	-0.0439469	0.253359	0.136522	0	0	15.1815	13.9289	13.1751	13.293	14.0396	13.4888	14.4404	14.0489	13.267	13.117	14.2338	13.7513	14.0992	14.0436	14.1628	13.2904	14.4739	13.919	13.2979	13.7102	13.7018	14.1083	14.1191	13.7433	13.9136	14.4627	14.11	13.8032	14.6613	13.5063	13.1342	14.7178	14.7239	13.8536	14.3389	13.6324	13.8505	14.6465	14.2252
KPCB_HUMAN	Q9UE50	Protein kinase C beta type	3	1	0.891601	-0.183861	0.924138	0.139526	0	0			11.359		13.3622	11.4563				11.9568					13.6525			14.354	14.2793	12.1995	13.3244				13.7791	14.7508			13.7284
RGS10_HUMAN	O43665	Regulator of G-protein signaling 10	2	2	0.627348	0.160636	0.682224	0.141499	0	0			17.696		18.9299	16.3138	18.3423			19.0554	18.2233	19.0919	18.9878		19.355	19.0361	17.0497	19.7066	19.7167	17.8779	18.7678			18.4643	19.2557	20.3667		17.5814	18.7668		18.5641	17.6138			18.6912	18.7693	18.4943	18.8984
CBPQ_HUMAN	Q9Y646	Carboxypeptidase Q	4	4	0.999529	0.00827358	0.866108	0.142086	0	0		11.7019						12.768	13.4739			11.2864		10.1469	11.9294			15.447				11.5273	12.5258	12.3346									12.1332			11.5489		13.1693
PPGB_HUMAN	P10619	Lysosomal protective protein	5	5	0.856681	0.0697545	0.451568	0.146077	0	0		11.3345	10.5691		11.044	11.7982	10.1706	12.0023	10.9907		11.6664	11.4583			10.9379		11.0819	11.9874		10.9924		10.8505		10.9811	10.4984	12.803	11.4038			12.1852	11.5648		11.7748
PTPRM_HUMAN	P28827	Receptor-type tyrosine-protein phosphatase mu	4	4	0.437157	-0.187995	0.535093	0.146368	0	0	12.6571		12.4959	12.0004	11.6407	12.7844	11.5233	11.9007	10.5732	11.4945	12.7631		11.2753	14.2993		12.6212	12.1353			12.7538		11.5868	11.5439	11.7493	12.1439		12.4644	11.8281	12.0702	12.9466	11.5335	11.8129	11.7557		12.0603	11.9134	11.609	12.8136
UBP34_HUMAN	Q8N3T9	Ubiquitin carboxyl-terminal hydrolase 34	2	2	0.218466	0.12215	0.1065	0.146896	0	0	12.3926	13.0474	13.1277	13.4692	12.8182	12.9334	12.2856	13.964	13.1817	13.0893	13.5937	13.7254	13.6541	13.4006	13.4398	13.769	13.0817	12.7291	12.6265	13.4763	12.9914	12.4879	13.1652	13.7011	13.1846	13.6907	12.7644	13.3271	13.418	13.0281	13.6755	13.4704	13.4147	13.5309	13.3512	13.3286	13.1774	13.7655	13.1505
CALX_HUMAN	P27824	Calnexin	3	2	0.934473	0.129071	0.894974	0.147448	0	0					10.3265					9.82845	11.4037				10.8453		10.5383	10.5791	10.4523		10.4482	11.0982	11.2425		10.6778		10.8608							4.00347
TNNI3_HUMAN	P19429	Troponin I, cardiac muscle	2	1	0.89628	0.0592081	0.451712	0.148827	0	0	13.242	12.5321			12.7711				13.432			13.0656								12.6053				12.3029			12.7141				12.6802				12.5633				12.379
1433G_HUMAN	P61981	14-3-3 protein gamma	7	4	0.854222	-0.1113	0.73864	0.148953	0	0	10.3327	12.7331	12.7756	12.5011		8.92856		11.3031	11.7737		12.0584	12.0566			11.8823	8.82759		12.3511		11.411	11.2472	12.159	11.404	11.3307		12.8822	11.0018	11.8683					12.2938	12.762	8.56052		12.7049	12.3028
HPBP1_HUMAN	Q9NZL4	Hsp70-binding protein 1	2	2	0.873466	0.0479394	0.25519	0.150404	0	0		10.5487	11.4245		11.0829		11.6445	10.5341	11.0357		10.0412	11.512	11.3263		10.0545	11.9639			10.838		10.6408	10.9017	10.6916	11.2815		10.726	10.6483	11.4632	10.8629	11.1338	11.3407	11.0721		11.5935	11.3794	11.3105	11.3531	11.5201
TRY1_HUMAN	Q9HAN4	Trypsin-1	2	1	0.795935	0.0702719	0.348274	0.150828	0	0	13.7323	15.2683	15.5231	15.2513	15.5054	15.7259	14.2454	15.1876	14.9634	16.146	15.3316	15.0864	16.2416	15.3226	15.4433	15.3085	14.6765	15.6433	15.4435	14.4995	15.0298	15.3464	15.7997	15.1499	15.2541	14.6148	15.4578	15.2162	14.326	15.5391	16.0586	15.1044	16.2114	15.1097	15.5764	15.6462	15.1773	15.6302	15.5113
P20D1_HUMAN	Q6GTS8	Probable carboxypeptidase PM20D1	2	2	0.602449	0.270503	0.886481	0.151008	0	0									9.57623						10.4957												9.77518
FYCO1_HUMAN	Q9BQS8	FYVE and coiled-coil domain-containing protein 1	2	1	0.817041	0.106629	0.729966	0.151105	0	0										11.9708			12.4844			11.7822	11.2089					11.744	12.9757		13.9805	12.6735				12.161			12.7119
COIA1_HUMAN	Q96T70	Collagen alpha-1(XVIII) chain	3	3	0.239302		1	0.151758	0	0																				11.1615
WASC5_HUMAN	WASC5_HUMAN	WASC5_HUMAN	2	2	1	-3.66e-05	0.667409	0.152849	0	0	11.1279			10.825			10.3874		12.8123	10.6207	10.9256	12.0514		11.1883	10.9107					11.4005		10.858	11.1089	11.2336			10.8855		11.8446				11.2333	10.8699		10.6142	10.2112	10.9928
CATD_HUMAN	P07339	Cathepsin D	8	8	0.533947	0.118485	0.365859	0.153296	0	0	11.8714	12.5285	12.0934	11.792		12.6979				11.2236	12.1562			10.8176	11.0169	12.0276	12.2738	12.0221	11.9746	11.5737	11.8392	12.1992		11.5889	12.0754	11.817	12.0435	11.4367	11.733	12.7793	10.9601	13.2525	12.1435		11.7617		11.7962		12.8108
ARF4_HUMAN	P18085	ADP-ribosylation factor 4	3	2	0.239302		1	0.153489	0	0
TSP4_HUMAN	P35443	Thrombospondin-4	23	18	0.952979	0.0178666	0.0379817	0.153875	0	+	11.8394	11.8614	12.0173	11.5907	11.7181	12.3613	10.9163	11.8284	11.6175	11.6195	11.559	11.7799	12.0936	11.9304	11.347	12.2312	11.6056	11.3496	11.9345	10.9821	11.368	12.2485	11.6994	12.068	11.8869	11.6766	11.2935	12.0739	12.0981	11.5005	12.1469	12.1463	11.6596	11.7717	12.1384	11.646	11.7966	11.9192	11.7237
LCAP_HUMAN	Q9UIQ6	Leucyl-cystinyl aminopeptidase	31	30	0.477516	0.119698	0.282778	0.15601	0	0	11.2953	10.7142	11.2528	11.4706	10.2755	10.2677	10.1304	10.7552	10.6016	10.502	10.7105	11.7353	10.9756	10.5743	10.9483	10.9711	10.9915	11.5333	10.2376	12.0111	11.4489	12.0197	11.2706	11.0623	11.8024	12.0775	12.2615	11.6318	11.1808	10.4025	10.4325	11.7857	11.1795	10.3361	12.1252	10.43	11.1633	11.0943	11.2112
MA2B2_HUMAN	Q9Y2E5	Epididymis-specific alpha-mannosidase	2	2	0.241061	0.148177	0.212218	0.156419	0	0	11.8222	11.9348	12.1754	11.6698	12.1415	12.0029		12.2204	11.3792	11.8842			11.1877	12.455	12.2204	12.3987	11.3759	12.9331	12.4898	12.3338	13.0132	11.5713	11.6844		13.0926	12.8588		12.2169	12.7755	11.6526	12.3083	12.0636	11.9341			10.8772		12.2186
TIE1_HUMAN	P35590	Tyrosine-protein kinase receptor Tie-1	3	3	0.831266	-0.10435	0.536766	0.157254	0	0						12.4999							12.4614				12.1683										11.8909											12.7269
MYOF_HUMAN	Q9HBU3	Myoferlin	2	1	0.199518	0.280276	0.536481	0.157992	0	0								8.92535		10.2709					10.3546				9.46701		9.30247		10.0494	9.43733					9.50186			9.78249	9.15358	9.64458		9.12425
RNAS1_HUMAN	Q9UCB5	Ribonuclease pancreatic	3	3	0.920678	0.0639338	0.0239343	0.158142	0	--	11.3678					10.202		11.422		14.0337	11.9882			10.9513	10.9798		12.7614			10.9532							10.6076		14.209				10.763			11.0347	11.0516		11.4073
LEP_HUMAN	P41159	Leptin	3	3	0.527026	-0.285776	0.734103	0.158305	0	0		10.7351	10.2265								10.8771				10.2556																		10.3324		11.1973	10.6857	10.1589
DHE4_HUMAN	P49448	Glutamate dehydrogenase 2, mitochondrial	3	1	0.0439583	-0.0201821	0.0371576	0.159828	++	++		10.3558					9.87851	10.7491																10.2127	10.0499					9.68525			10.3667
CATA_HUMAN	P04040	Catalase	24	24	0.934882	-0.0322507	0.199888	0.160143	0	0	11.3538	11.3262	11.5966	11.633	11.2389	12.7793	11.4429	11.5366	11.5394	11.1046	11.3187	11.4149	12.0759	11.0686	11.6462	11.4463	11.9936	11.154	11.4746	11.4394	10.7701	11.1519	11.9484	11.0831	11.2327	11.721	10.8168	11.6719	11.0804	11.9258	11.1999	11.5972	11.0788	11.5625	12.049	11.4803	11.6548	11.7249	10.1987
SCFD1_HUMAN	Q9UNL3	Sec1 family domain-containing protein 1	2	2	0.0122467	0.349148	0.329209	0.161794	+	0	11.6404	11.8568	10.8852	10.921	11.271	11.1676	11.0745	11.7309	11.3017	11.8256	12.0218	11.4039	10.8616	12.7626	12.8878	12.9629	12.5376	11.3294	11.9487	11.89	11.131	12.7792	11.1439	11.5434	11.8146	11.4564	10.8321	12.5312	11.7896	11.1915	12.6388	12.0335	11.7086	11.5315	11.8062	11.333	11.3094	11.7618	11.5295
ARP2_HUMAN	P61160	Actin-related protein 2	6	6	0.685868	-0.235425	0.865635	0.163389	0	0								10.8144	10.954						10.8449							10.4959		10.1005		11.5172				11.6761							10.3921
ANGI_HUMAN	P03950	Angiogenin	10	10	0.92663	0.0223895	0.02425	0.164188	0	+	11.3463	10.677	10.7642	10.9072	11.1808	11.0137	11.3149	11.3219	11.1327	10.7808	10.9336	11.2766	11.1068	10.9248	11.265	11.2379	10.4335	11.341	11.5079	11.1723	10.987	10.9191	11.4849	11.0183	10.4664	11.3723	10.7592	11.1912	11.5696	11.3774	10.6074	11.5838	11.1933	11.2126	11.1605	10.2913	11.1998	11.4502	10.677
CAP1_HUMAN	Q01518	Adenylyl cyclase-associated protein 1	20	17	0.954554	-0.0382232	0.403113	0.167252	0	0	13.4477	13.1774	13.425	13.0152		13.3343	10.4608		13.7678	13.854	14.0839	13.8117	12.9391	12.4813	13.123	13.726	13.5475	13.7657	14.0435	13.3782	13.0088	11.326	13.6905	13.2478	13.466	13.7596	10.8025		13.7256	13.2375	12.4927	13.8215	14.1713	13.452	13.4952	13.7357	13.8296	14.2398	13.5527
WDR1_HUMAN	O75083	WD repeat-containing protein 1	20	20	0.974255	0.0168884	0.0883628	0.16809	0	0	11.11	11.3317	11.4286	11.3113	11.8603	11.8599	11.0259	11.4396	10.8457	11.5525	10.9291	11.011	10.7063	11.141	11.3899	11.1979	12.1748	11.5028	11.6681	11.1305	11.6964	11.3341	10.8013	11.1557	11.499	11.1434	11.5615	11.4605	11.0971	11.5328	10.6742	11.7525	11.3903	11.5598	11.6942	10.7727	10.8891	11.2872	11.3115
AMER2_HUMAN	Q8N7J2	APC membrane recruitment protein 2	2	2	0.99528	-0.011909	0.384269	0.168126	0	0	11.3866		10.2978			10.9455		11.1309	11.3564	11.9374	11.5023			10.888	10.7001			11.0837		11.3272	10.7481			11.9185	11.8484								11.9153	11.7722		12.8166	11.2688
ARC1B_HUMAN	O15143	Actin-related protein 2/3 complex subunit 1B	5	4	0.9009	-0.0647491	0.451584	0.170131	0	0	14.4764	13.6033	12.9256	13.1447		13.3744					13.0082	13.7968			13.2818			13.8204		13.3142		14.2523	14.5638		14.0754	14.7682	13.8995	14.1332	15.7472	14.285					13.7393	13.5674
ROCK2_HUMAN	O75116	Rho-associated protein kinase 2	5	5	0.486087	0.078675	0.0369925	0.172325	0	+	20.2026	19.7029	19.4778	19.6104	19.6736	19.6577	19.8129	19.7619	19.9168	19.956	19.7947	20.1322	19.8145	19.228	19.6005	19.9352	19.4389	20.1205	20.3188	19.4479	19.9958	19.3171	19.9792	19.6346	19.9382	20.1486	19.8178	19.9149	19.844	19.3662		19.8187	20.1132	19.811	19.2797	19.9491	19.2937	19.8902	19.5051
TKT_HUMAN	P29401	Transketolase	25	25	0.297703	0.377126	0.738649	0.17237	0	0	9.87854	10.2313	13.198	12.924	10.141	10.2949	9.8221	9.57856	11.0238	9.0266				9.39169	9.77993				10.5978	10.1577	9.59683		9.36847	9.2987	10.0563	10.1238	10.3511			10.467		12.8156	10.5739	9.78894	10.0843		10.6091		9.77819
IGJ_HUMAN	P01591	Immunoglobulin J chain	2	2	0.703697	0.188814	0.775614	0.172374	0	0						11.1205																	10.2226
PDC10_HUMAN	Q9BUL8	Programmed cell death protein 10	2	2	0.98695	0.035399	0.885101	0.172929	0	0	10.9722							10.6567	12.1323		10.9021				10.7383	11.5214				11.3549		11.3246	11.1867				12.2218						10.8634
GRAM2_HUMAN	Q8IUY3	GRAM domain-containing protein 2	2	2	0.362052	-0.409334	0.840074	0.172981	0	0						11.9603	10.6397				11.0204							11.1425											10.7764				11.4699			10.6284
FCN1_HUMAN	O00602	Ficolin-1	3	3	0.993825	0.0222773	0.486541	0.173414	0	0										11.8177						11.8849				11.9052																	11.1876
DPP4_HUMAN	P27487	Dipeptidyl peptidase 4	7	7	0.235854	0.32398	0.635453	0.174424	0	0	15.4692	16.0923	13.5745	15.5513	14.6274	15.3527	15.6361	17.0399	15.0692	14.5888	14.1952	15.152	14.7666	16.4126	13.2498	15.2392	14.634	15.8467	16.491	14.6527	16.3708	15.3752	16.0275	15.2285		17.314	15.2672	16.3837	17.5246	13.4918	13.5577	16.3964	15.0112	14.9388	16.3998	14.0168	15.4674	15.4959	15.8952
PLSI_HUMAN	Q14651	Plastin-1	3	1	0.257093	0.0848441	0.00461222	0.174462	0	+	12.0354	11.7964	11.8557	12.107	11.9981	12.0535	11.6195	11.4745	11.7487	11.907	11.4675	12.2309	11.8263	11.9888	12.46	12.2967	11.5018	11.7273	11.8664	12.7482	12.2204	11.8131	12.183	11.8377	11.8577	11.5951	11.9186	12.0631	11.8197	11.8255	11.9468	12.3435	12.1925	11.5026	12.1046	12.1096	10.9812	12.4548	11.4198
CAH8_HUMAN	P35219	Carbonic anhydrase-related protein	2	2	0.457636	0.133914	0.27221	0.174885	0	0	11.7979	13.0152	12.2652	12.5905	11.7015	12.9329	11.6216	11.5721		11.8955	10.9264	11.8263		12.0997	11.8159	12.1923	12.157	12.1799	12.4342	12.1487	12.277	12.3312		11.6972		12.1238	12.8722			13.0247	11.5488		12.3032	12.1962			11.596
SPTB2_HUMAN	Q01082	Spectrin beta chain, non-erythrocytic 1	4	3	0.748232	0.186696	0.760871	0.175089	0	0	13.3743	12.24	13.2402	13.447	13.8675	14.8158	14.279		12.2734		12.881	14.2146	16.289	13.588		16.692			14.59	13.2053	15.0258	11.4244	13.9245	14.3699	14.4337	14.3582	13.923	14.4064	12.5125	13.2799	16.183	11.6899	13.1115		15.0737	13.6232		16.3211	12.7803
DPYL3_HUMAN	Q14195	Dihydropyrimidinase-related protein 3	2	1	0.995554	0.0172812	0.00135731	0.175276	0	++	10.198			10.8365					9.63466					10.5635		11.019									10.2846						10.5459					10.8308
CXCL7_HUMAN	P02775	Platelet basic protein	7	7	0.493459	0.199906	0.559748	0.176434	0	0	14.5855	15.3981	14.7153	13.4221	10.9126	12.2203	11.2604	11.806	14.4704	12.3853	14.766	14.4046	12.6347	15.4797	13.3643	12.5891	13.8825	13.1318	12.0016	14.3431	13.5931	14.5495	14.2251	16.185	12.0367	13.7306	13.3296	14.4812	13.3129	12.1465	13.0188	13.9073	14.5141	15.5773	14.2193	14.0996	11.5304	14.952	13.1832
BIEA_HUMAN	P53004	Biliverdin reductase A	5	5	0.256425	0.170179	0.219593	0.177285	0	0	11.9545	12.8942	12.0442	11.7138	12.551	11.2126	10.8079	12.7455	12.7933	11.7208	12.3826	12.972	10.9443	12.2469	12.6502	12.8575	12.2972	12.0243	12.0128	12.6009	12.704	12.7955	11.8387	12.1557		12.6234	11.3797	12.6577	11.5765	12.2937	12.8753	12.8774	12.6854	12.8441	12.4391	12.747	11.5754	13.0842	13.0633
CFA77_HUMAN	CFA77_HUMAN	CFA77_HUMAN	2	1	0.239302		1	0.178022	0	0																													11.9026									11.5954
CO5_HUMAN	P01031	Complement C5	168	168	0.211926	0.0676694	7.28e-05	0.17819	0	+	17.1705	16.8772	16.8192	17.3659	16.9214	17.1867	16.2714	16.9149	16.8729	16.6244	16.7911	16.8436	17.2378	16.9433	16.8447	17.3485	16.6715	16.664	16.6836	16.5054	16.7278	16.8956	16.6696	16.8894	16.9238	16.5632	16.9876	16.7775	16.7191	16.8781	17.0709	16.5319	16.5788	16.7085	17.0543	17.0164	17.1877	16.8935	16.7813
STRAP_HUMAN	Q9Y3F4	Serine-threonine kinase receptor-associated protein	3	3	0.0783441	0.227105	0.189002	0.178195	0	0	13.4301	14.3578	14.5956	13.0888	14.7846	13.7078	12.8516	14.2311	14.9571	14.5473	14.4775	14.435	13.2473	13.9546	15.1717	14.5058	14.5129	14.2044	14.9405	13.7141	14.2999	14.2554	13.3044	14.0977	15.4474	14.3526	12.9462	14.1968	12.0268	14.4595	14.6419	14.1536	14.3739	14.5052	15.3209	14.5464	14.4603	14.6937	14.4738
MYL9_HUMAN	P24844	Myosin regulatory light polypeptide 9	3	1	0.814574	0.0907202	0.438309	0.180454	0	0	11.187	10.6354		11.2145	10.7563	10.6577	9.88754	10.7642	11.4665	10.0953	12.0017	11.5143	11.2956	12.7954	10.6397	12.263		10.3339	10.2132	10.8507	10.4095	10.9071	11.4836	11.004			10.3519		10.593		11.3415	11.3901	11.1706	10.7524	11.8393	12.6201	11.3858		10.678
CYTC_HUMAN	P01034	Cystatin-C	9	9	0.935507	0.0198481	0.00724467	0.181414	0	+	12.8929	12.4346	12.2307	12.4006	12.66	12.3907	12.3176	12.6634	12.5887	12.2155	12.4614	12.7571	12.8326	12.6509	13.083	12.546	12.0898	12.8336	12.4702	12.8331	12.8937	12.5248	12.8196	12.4998	12.6646	13.1467	12.8937	12.5793	12.908	12.3375	12.2826	13.1384	12.7389	12.5343	12.8387	12.2446	12.5901	12.4888	12.4554
SYWC_HUMAN	P23381	Tryptophan--tRNA ligase, cytoplasmic	5	5	0.815961	0.268343	0.913613	0.182308	0	0						7.46093									10.6559					10.0861	10.947					9.72188
BHMT1_HUMAN	Q93088	Betaine--homocysteine S-methyltransferase 1	2	1	0.862306	-0.0579163	0.272065	0.183047	0	0	12.3716		12.117	11.267	11.2545		11.266	13.0669	13.0828	12.8766	12.3989	12.2275		12.4577	12.4959		12.2979	11.9715		12.7805	12.4284	12.6418	11.291	12.6427	11.7326	13.1148	10.9481	11.621	11.5251	12.9145	12.5898	12.5845	11.1805	12.5225	11.9267		11.9583	11.6465	12.5676
NCAM1_HUMAN	Q59FL7	Neural cell adhesion molecule 1	11	11	0.48183	0.148133	0.256196	0.185192	0	0	11.0359	12.3977	11.4961	12.7363		12.3991	11.8194	11.6997	11.767	12.3204	11.1767	12.0929			12.527		12.1353	11.2482		11.0072		10.9443	12.4724	11.2988	11.6352	13.291	12.2762	12.0595	11.4577			12.3675	11.7628	11.6386	12.5867	11.7448	11.058	11.6835	11.0826
GAPR1_HUMAN	Q9H4G4	Golgi-associated plant pathogenesis-related protein 1	2	2	0.724948	-0.208866	0.740288	0.185238	0	0										11.3692				11.8504	11.9579					11.3742					12.2657
UBA1_HUMAN	P22314	Ubiquitin-like modifier-activating enzyme 1	7	7	0.981446	0.0374488	0.706936	0.186659	0	0								11.0417	11.6805		12.2999						11.5091						11.2109				12.3072
CRAC1_HUMAN	Q9NQ79	Cartilage acidic protein 1	14	14	0.694607	0.0558093	0.0225967	0.187424	0	+	14.3958	13.4984	13.778	13.6758	14.0322	13.715	13.11	14.4133	13.4511	13.8219	13.7332	13.7288	14.5588	13.4722	13.8168	13.9263	13.3623	13.2925	13.7005	13.8087	13.2739	13.8298	13.5968	13.6656	14.4369	14.06	13.5634	14.0105	14.1303	14.1754	13.7621	14.2075	13.2653	13.6605	13.3933	14.0812	13.3793	13.748	13.8127
TYB4_HUMAN	P62328	Thymosin beta-4	11	10	0.881521	-0.0581448	0.272262	0.188083	0	0	20.1979	20.7918	21.4626	20.7934	21.0296	19.9432	21.0022	18.9909	20.1981	19.1441	20.3303	20.368	19.6085	20.3324	19.2333	20.2399	19.5647	19.6443	19.615	20.3021	19.8537	20.0937	20.204	19.8535	19.9688	20.082	19.4618	20.2481	19.5629	19.3293	19.6668	20.2792	20.4457	21.7221	20.2335	19.3036	20.3258	20.9726	19.3617
TCPQ_HUMAN	P50990	T-complex protein 1 subunit theta	7	7	0.810505	0.0500125	0.0587119	0.189753	0	0	13.5116	11.9515	12.7496	12.2524	12.0531	13.0506	11.6921	11.5954	12.8932	12.7323	13.1452	12.6164	12.8074	12.8288	12.5432	12.7987	12.6981	12.6667	12.9683	12.8155	12.3987	12.6303	12.162	12.6064	12.9296	13.1769	12.7511	11.9208	13.4651	12.5846	12.3187	13.0247	12.4967	12.7985	12.6438	13.4194	13.2866	12.8819	12.1621
DSC1_HUMAN	Q08554	Desmocollin-1	2	2	0.411572	-0.122479	0.130159	0.190233	0	0	13.3954	12.7345	11.4574		12.3671	12.4327	11.697	11.9618	12.636			12.365	11.6925	12.3829		12.2921		12.1247	11.9537	12.3282	11.2993		12.6604	11.9884	12.1601	12.6063		11.9831	12.1298	12.4513	12.3529			11.9087	11.7763	11.3476	12.0926	12.767	12.6661
AKA12_HUMAN	Q02952	A-kinase anchor protein 12	2	2	0.314829	0.252404	0.349743	0.190447	0	0														10.8113						10.7645
SN12L_HUMAN	Q6IEE8	Schlafen family member 12-like	2	2	0.764046	0.0812272	0.19514	0.19102	0	0	10.5019	10.5649		9.81889	10.4062	10.8357			10.0325					10.2269				10.3945				10.9305	10.7498	10.609		10.7787	10.0857	10.8318		10.4585		11.4489	10.5566	10.917			10.1902
MPRI_HUMAN	P11717	Cation-independent mannose-6-phosphate receptor	25	25	0.629334	0.0795909	0.0735421	0.191086	0	0	10.6093	8.95398	10.3094	10.1536	10.8755	10.9624	10.3818	10.0822	10.0478	10.1701	10.3674	10.8125	10.6007	9.70727	10.5502	11.1766	10.7254	10.162	9.8793	10.442	10.5693	10.7297	10.1829	10.5852		11.245	10.5509	10.4	10.6819	11.8271	10.4982	11.3369	10.5136	10.4781	11.023	10.9059	9.95485	11.1048	9.06132
SPIT1_HUMAN	O43278	Kunitz-type protease inhibitor 1	6	6	0.262465	0.157502	0.141757	0.191187	0	0	13.5186	13.8494	13.8727	12.6985	14.148	14.1418	13.9296	13.9152	13.351	13.4253	13.7388	14.1365	13.8458	13.2418	13.0965	14.1616	13.8269	14.0391	13.6781	11.1847	13.3827	15.531	12.2073	14.1231	13.1566	14.1541	12.8805	13.7107	13.8864	13.6257	14.2914	14.2706	13.7736	15.187	13.4522	13.532	14.391	13.9767	13.744
CAGE1_HUMAN	Q8TC20	Cancer-associated gene 1 protein	2	2	0.944966	-0.0618462	0.637408	0.191198	0	0				11.5773			10.8632	10.7969	11.5208	10.331	10.7983	11.6206	11.3392		10.2971									10.3572		11.5958			11.1785							10.2202	11.1429		11.5452
FABP5_HUMAN	Q01469	Fatty acid-binding protein, epidermal	2	2	0.987266	0.026263	0.466105	0.191467	0	0	11.8531	12.5247	14.1422	12.4555				11.9506	12.2896	10.6488	11.9886	12.2614		11.8062	10.8018		11.6859			12.4902	11.1544	12.5522	11.6649	11.5911		11.4429	10.8147	12.5216	11.5093	11.5993	12.2882		12.5433	13.8493	12.2632			13.1152
SEPT7_HUMAN	Q16181	Septin-7	8	8	0.636124	0.0658172	0.0289578	0.192389	0	+	11.5232	11.441	11.8035	11.2093	11.1821	11.9944	11.4065	12.0825	12.1255	11.2001		11.8765	11.9487	10.8749	11.448	12.1353	10.9763	11.4355	12.1301	11.9232	11.5686	11.5293	11.696	11.1699	11.7644		11.5047		12.006	11.7878		11.299	11.601	11.8917	11.4854	12.3546	11.8723	12.7519	11.8635
GSHB_HUMAN	P48637	Glutathione synthetase	8	7	0.00281216	1.19642	0.755744	0.1933	+	0		11.4212	11.74	11.6268	11.675		11.7845	10.5674	11.6932					11.5731	10.4891					10.9743			11.177					11.5828	11.7312				10.9922	11.9074			12.0484		11.9762
C1S_HUMAN	Q9UCV3	Complement C1s subcomponent	63	61	0.58035	0.0495937	0.000706698	0.1937	0	+	14.4683	13.9085	14.0352	14.1355	14.4509	14.433	14.0334	13.7495	13.3708	14.0994	13.419	13.8031	14.2267	13.7955	13.5196	14.2895	13.623	13.3081	13.904	13.772	13.898	13.928	13.8276	13.5639	13.9677	13.4021	13.8368	14.2126	14.1464	13.5952	14.0014	14.1707	13.9494	13.9594	13.8776	14.2723	13.8254	14.2122	13.6154
B3GN2_HUMAN	Q9NY97	UDP-GlcNAc:betaGal beta-1,3-N-acetylglucosaminyltransferase 2	4	4	0.123556	0.234553	0.190152	0.194136	0	0	10.812	10.9055	10.7113		10.8216		10.1799	10.4977	9.4705		10.6502	11.2191	11.1701		10.6369	11.2123		9.89562	10.3329		10.1772			10.7535	11.0133				10.9438	9.81837			10.3197	11.3674	11.0357	10.2048	10.7535	11.1249	9.83833
MRC2_HUMAN	Q9UBG0	C-type mannose receptor 2	4	4	0.562493	-0.163965	0.333521	0.194442	0	0			9.98985							10.4099																								10.9048
FLNB_HUMAN	Q9UEV9	Filamin-B	5	1	0.0136708	-0.397835	0.0473551	0.196313	--	--	12.835							13.3935	14	13.0468	12.5414	13.3921			12.7953				12.6705	12.6306	11.982			12.2504	10.7712	13.9415		11.1339	11.9904		13.4088		13.3409		12.8007	12.3054	11.6932	13.9206
FBLN4_HUMAN	O95967	EGF-containing fibulin-like extracellular matrix protein 2	2	2	0.0436241	0.189865	0.0301192	0.197436	+	+	13.2478	13.8158		13.4071	14.1007	13.2287	12.7285	12.4756	13.0721	13.4187	12.9341	13.1745	12.885	13.5122	13.7662	13.2745	13.1287	13.0691	13.2651	12.9008	12.96	13.5166	13.082	13.0248	13.8425	13.0483	13.0924	13.7483	14.0796	13.7773	12.9215	13.7357	12.5573	13.2684	13.3945	13.2304	13.2754	13.8353	12.7244
PLF4_HUMAN	P02776	Platelet factor 4	6	3	0.468783	0.210438	0.495317	0.197738	0	0	12.4437	14.4648	12.6535	11.4262	10.3587	11.1416	10.7002	10.9311	11.8934	10.5161	12.4387	12.887	10.805	14.4477	11.7446	10.9316	12.9952	11.7589	10.5265	13.5264	12.5223	13.4901	12.5697	14.4132	11.7715	12.653	11.9051	12.8839	11.447	11.2704	11.2143	13.0124	13.5975	14.1341	12.7216	11.8885	10.0144	13.2857	11.6788
UBE2N_HUMAN	P61088	Ubiquitin-conjugating enzyme E2 N	2	1	0.997337	-0.00934199	0.330989	0.198148	0	0	11.6825	11.9383	11.3886	10.533		11.2438		13.5769	12.0315	10.3628	13.0399		12.7124	11.4088	10.8699	11.6933	11.5622	11.4989	11.1401	11.1275	11.4161	11.5849	11.3394	12.4091	11.4931	12.7279		11.3525	11.5882	11.5016	12.2433	11.8304	10.9721	13.5636		11.703	11.3619		11.7064
MIME_HUMAN	P20774	Mimecan	4	4	0.784111	0.07556	0.183355	0.198247	0	0	11.8198	10.7704		10.8104		11.7732		11.0452	11.8592	11.8804	10.8961	11.5397	10.9092	11.7822		12.1033	11.1402			10.8467	10.6649	12.3427				11.4445	11.7907		11.3998	11.8837	11.3503	11.5835	11.197	10.6263	11.6168	12.2164		11.7627	11.0875
HGFA_HUMAN	Q04756	Hepatocyte growth factor activator	20	20	0.751207	-0.0660285	0.0860975	0.198385	0	0	10.603	10.3793	9.53842	10.5471	9.9932	10.4867	9.6057	10.4711	9.65119	9.78941	10.3157	10.4101	11.2251	10.3347	9.55859	10.8122	10.0792	9.45066	9.87761	10.6314	10.0864	10.3036	9.82882	10.0523	10.6035		10.0447	10.032	9.91364	9.97371	10.4174	10.6962	10.018	9.89972	10.5777	10.361	10.0528	9.92363	10.1085
CAMP_HUMAN	P49913	Cathelicidin antimicrobial peptide	8	8	0.823927	0.117084	0.0037134	0.198819	0	--	11.0494	10.569		9.91268	10.9251	10.7162				11.0886				10.589		11.2996				10.6867							10.0454			11.1938	10.9857	12.2197	10.2908						11.2903
CADH2_HUMAN	P19022	Cadherin-2	5	5	0.986689	-0.0133109	0.0497502	0.199112	0	+	10.4687	10.9731	10.6544	10.5906	10.5976	11.1837	10.1925	10.6776	9.81953	9.99799		10.7075		11.2707	10.8457	11.4922	10.6349	10.5079		10.1507	10.3757	10.5246	9.96294	10.7313	10.9787	11.3114	10.7516	10.7354	10.994	10.5325	10.7171	11.2521	10.8421	11.3803	11.1257		10.6033	11.1759	11.2291
REG1A_HUMAN	P05451	Lithostathine-1-alpha	2	1	0.359838	-0.233878	0.479239	0.199494	0	0	10.0323	9.86012	10.0916	10.5537		10.3684		9.49862	10.0381	10.2876	10.0843			10.2337	10.4099		10.0379	10.2871		10.7853	9.96839	10.963	9.49968	9.67115		10.5548			10.183	10.1244		10.0523	10.1546			12.2043	10.6576
SPP24_HUMAN	Q13103	Secreted phosphoprotein 24	4	4	0.10056	0.362384	0.00235012	0.200218	0	--	11.921	10.0196	11.1069	10.6195					12.103	11.117	11.3648	13.0921	11.8266	11.0384				11.1185	11.3778		11.5886		10.0368	9.96883			10.694			10.3853			9.28209	10.4964				11.4284	11.2768
HNRPK_HUMAN	P61978	Heterogeneous nuclear ribonucleoprotein K	2	2	0.998355	0.0129897	0.764885	0.200262	0	0	11.0299					11.0286					10.3494													10.8166			10.4928										11.4352
THIO_HUMAN	P10599	Thioredoxin	3	3	0.948759	0.098763	0.784967	0.202791	0	0	12.4113	11.7231	11.8699	12.2686		11.9727	11.3945	10.7126	11.3503		12.558	11.0494	10.9776	10.2774	10.5302	12.4091	12.4543			15.1979		12.1186	11.7374		10.5357	12.6796	11.8789	12.4215		12.4665	11.5646	19.1058	11.6149	11.0216	12.3293	11.0258		11.6405	12.2069
IGF1_HUMAN	P05019	Insulin-like growth factor I	7	6	0.609468	0.0930613	0.117964	0.205291	0	0	11.2562	11.6068	11.1296	10.6717			10.2739	11.3369	11.2372		10.8364	11.9798	11.308	11.8845	11.6182			12.0829		12.2177	11.6876	10.254	11.2583	11.1067	12.2646	11.0221	10.8258	11.2322		11.2007	11.4093		11.2347	11.008		10.5503	10.3128	11.2061	10.7824
ZEP1_HUMAN	P15822	Zinc finger protein 40	3	3	0.0458037	0.216879	0.133309	0.205836	--	0		11.1325			11.2041				11.0721			11.522	11.0242	11.1364	11.0078			10.7447												11.112
SAMP_HUMAN	P02743	Serum amyloid P-component	14	14	0.996738	0.00961059	0.226025	0.208085	0	0	16.6562	14.0737	15.0237	13.9213	14.2582	15.0066	14.8175	14.8081	15.6242	13.9458	17.9213	14.6543	17.5086	14.6323	14.8369	15.1256	15.1809	14.9322	14.1655	14.8048	15.099	14.9212	15.1689	14.5099	14.9203	16.4117	14.2033	15.5976	15.5945	14.2612	16.2972	16.7072	15.6295	15.3676	15.9973	17.1103	15.5854	15.5346	14.8396
ROA2_HUMAN	P22626	Heterogeneous nuclear ribonucleoproteins A2/B1	5	5	0.994678	0.0384632	0.00543865	0.208223	0	++																													11.5302
ODFP2_HUMAN	O60631	Outer dense fiber protein 2	2	2	0.919061	0.111774	0.713703	0.209463	0	0		12.4683						11.0501											10.4986		10.7351														12.5178		11.8858		11.3342
FA49B_HUMAN	Q9NUQ9	Protein FAM49B	4	2	0.296709	-0.19229	0.219721	0.20973	0	0	12.3345	12.4478	13.1642	15.6345	12.8476	12.6242	12.196	12.4357	11.9031	12.9179	11.8382	12.8987	11.8024	12.8268	13.0017	12.8857		12.1877	12.0423	12.2892	13.632	13.1442	12.7304	12.2094	13.1766	12.295	12.4657	13.7952	13.5004		12.2487	12.8321	12.975	12.4335	13.0496	12.551	11.9803	12.6822	12.0453
TBCA_HUMAN	O75347	Tubulin-specific chaperone A	2	2	0.338455	0.322954	1	0.210736	0	0																									11.4012
K1C16_HUMAN	P08779	Keratin, type I cytoskeletal 16	7	2	0.857698	0.0747841	0.398722	0.211208	0	0				11.3338	11.4016		11.7764	11.8576	11.569		11.3408				11.766					11.094			11.3305	11.5711	11.8758	12.1408					11.9298	12.1037				11.4883			10.9869
EPHA4_HUMAN	P54764	Ephrin type-A receptor 4	3	3	0.729957	0.193584	0.655897	0.211679	0	0			12.2298		12.7209	12.5909	10.3781				13.6167			12.345	12.1767		11.6892	13.0303						12.2155							12.5801		13.5959	12.4588		12.4905	15.267	13.5726
SODM_HUMAN	Q9P2Z3	Superoxide dismutase [Mn], mitochondrial	2	2	0.409764		0.227645	0.211896	0	0		11.0892
PSA4_HUMAN	P25789	Proteasome subunit alpha type-4	4	4	0.476548	-0.18916	0.457852	0.212474	0	0	11.9632								13.3411	14.3865	14.3104				14.349			14.5851	14.5266	14.3655	14.8864	13.2316	13.3654		14.6522	14.2302	14.0865		14.0149			15.251	13.9796				13.7521
DBNL_HUMAN	Q9UJU6	Drebrin-like protein	5	5	0.179794	0.380579	0.573377	0.213049	0	0	11.2954	10.7265	14.9467	10.3553		10.3067	10.4036		12.6894	11.4835	11.0693	11.9127	11.5615	11.8887	10.3539	12.2916	11.4551		12.7933	11.0635		10.8061	11.1735			12.872	10.3483	11.787		10.681		11.8088	14.2882		11.5474				10.5427
APOC4_HUMAN	P55056	Apolipoprotein C-IV	11	11	0.721715	-0.117666	0.33365	0.213375	0	0	13.49	11.487	13.2489	12.1762	12.1643	13.9991	11.0407	12.2689	11.4934	13.5838	11.3227	10.7672	13.1996	11.656	12.5631	13.941	12.7563	13.9465	14.2066	12.2684	13.4686	11.7121	12.1059	11.9968	12.5444	13.0328	13.1382	11.3415	12.4512	11.958	12.5545	13.8319	12.1402	11.4565	10.713	10.6634	12.4091	11.9665	13.1692
SPA11_HUMAN	Q86U17	Serpin A11	9	9	0.856862	0.0670752	0.170719	0.213867	0	0	11.1421	10.9446	11.1122	10.3096	11.7962	12.0677		10.4312	11.7787		11.6645		10.5786			11.2354	10.4984		10.8863	11.5439								10.6515	11.7224			12.4451	11.057			12.2456	11.982	11.3173
NEGR1_HUMAN	Q7Z3B1	Neuronal growth regulator 1	2	2	0.997902	0.00586975	0.0936972	0.214044	0	0	11.9522	13.2198		12.0527			12.6434	11.5704	11.8405	11.6636				12.0207			12.7271	13.1382	13.0732	11.8412	12.0739	12.5041	13.0531	13.0115	12.4282	13	12.1653	11.8418		12.8293			13.0805	12.8173		12.3788	11.948		12.9813
HS902_HUMAN	Q14568	Putative heat shock protein HSP 90-alpha A2	7	1	0.143997	0.891974	0.861404	0.2147	0	0	10.5981			10.771		11.6565		10.7574	11.695	11.2235	11.7077	10.9575		10.6936		11.2401							11.3636				10.891		11.7212						11.6592	11.7464
THOP1_HUMAN	P52888	Thimet oligopeptidase	3	3	0.0173994	0.314289	0.0956918	0.216963	+	0																				10.9005
BMP1_HUMAN	Q99422	Bone morphogenetic protein 1	7	4	0.500507	-0.0712944	0.440545	0.216984	0	0										9.721					10.5362								10.6099				10.2022
ECM1_HUMAN	Q8IZ60	Extracellular matrix protein 1	36	35	0.983078	-0.00936176	0.000402814	0.218421	0	+	12.7548	12.7434	12.4103	12.1979	12.2589	12.9553	12.4788	12.8585	12.8916	12.2344	12.2971	12.6499	12.6417	12.3667	12.5447	12.738	12.7784	13.2067	12.566	12.753	12.4071	12.6277	12.5775	12.3324	12.8354	12.2049	12.5923	12.366	12.6848	12.8212	12.4203	12.8798	12.6662	12.4546	12.4995	12.7534	12.5222	12.4204	12.2407
CPN2_HUMAN	P22792	Carboxypeptidase N subunit 2	25	25	0.81602	0.0377313	0.00246632	0.219248	0	+	16.4476	16.0852	16.0904	16.4997	16.1196	16.1074	16.218	16.3675	16.4852	16.1244	15.1048	15.8532	15.7651	16.3891	15.2539	16.0445	15.9532	16.4529	15.0123	16.0158	16.7086	16.1772	16.4455	15.8021	16.4363	15.7511	16.9362	15.9786	15.9465	16.0634	15.9208	15.5855	16.475	16.0929	16.6713	16.5107	16.0536	15.1671	16.1376
ANGL6_HUMAN	Q8NI99	Angiopoietin-related protein 6	2	1	0.126518	0.836511	0.863983	0.22079	0	0									10.0184		10.9309
LASP1_HUMAN	Q14847	LIM and SH3 domain protein 1	8	7	0.921064	0.061527	0.329548	0.224294	0	0	10.6453	10.3261	10.1722	10.0167	10.5454	10.8103	10.6266		10.4215	9.9545	10.3782	10.8254		10.5553	10.6702	7.57065	10.5633	10.396	10.4155		10.1266	10.8057	11.04	10.0738	11.3673	10.6369	10.6213	10.0097	10.8603	10.5434	10.853	11.0259	10.7798	8.04053	11.6523	11.6586		11.0797
RBP2_HUMAN	P49792	E3 SUMO-protein ligase RanBP2	2	2	0.954023	0.0393541	0.352832	0.224426	0	0									10.488					10.8033	10.2568	11.7673						11.2378			10.7486									10.653					11.0015
CO9_HUMAN	P02748	Complement component C9	62	60	0.723784	0.0508944	0.00375938	0.224572	0	+	17.9466	17.7752	17.7631	18.4294	17.3525	18.0924	17.7705	17.5525	17.4464	17.5941	18.0935	17.8404	18.0955	17.4566	17.6607	18.1118	17.2399	16.9248	17.6971	17.4302	17.4225	17.5387	17.9566	17.7609	17.4364	17.6182	17.3984	17.8737	17.657	17.9625	17.909	17.4888	17.4268	17.5163	17.7147	18.0777	18.0533	18.1661	17.8278
LAT1_HUMAN	Q01650	Large neutral amino acids transporter small subunit 1	2	2	0.0181527	0.297822	0.284446	0.227408	--	0	9.79628		10.4054	10.5446	9.92453	11.2971	10.2284			10.362	10.9013	11.3139			10.5661		10.4249	11.0757		10.6381						11.5256	10.2659			10.8503				10.526		10.0438	10.7234		10.8219
POTEJ_HUMAN	P0CG39	POTE ankyrin domain family member J	6	1	0.984184	-0.0215519	0.178609	0.228356	0	0	16.0335	16.8489	17.8946	17.2728	13.4672	15.896	15.5547	14.9316	15.1521	14.4579	15.8649	16.2091	15.0777	15.2699	14.8469	15.4409	15.5347	14.6933	14.5972	15.7407	15.5801	16.5397	15.1464	15.4827	15.3654	15.1761	14.4156	16.0445	15.0264	15.6511	15.7037	15.7888	15.9657	17.1346	15.9511	14.7389	15.4748	16.1107	14.914
CC151_HUMAN	A5D8V7	Coiled-coil domain-containing protein 151	2	2	0.339361	0.398373	0.714428	0.228667	0	0						11.2646				10.8827											10.9662	11.0417		11.3568											10.8174	11.3866
ADA17_HUMAN	P78536	Disintegrin and metalloproteinase domain-containing protein 17	2	2	0.814533	-0.474008	0.951477	0.230266	0	0			10.4643	10.343																11.8847							10.898
PGCA_HUMAN	P16112	Aggrecan core protein	3	3	0.725324	-0.079432	0.0708242	0.232231	0	0	14.5008	13.0424	13.8883	14.2292	14.0711	13.4314	13.7502	13.9632	13.3759	13.7844	14.814	13.109	14.1142	14.216	13.5598	14.7451	14.4024	12.6655	13.5465	14.4427	13.0756	12.4699	12.8516	13.0192	13.6289	13.956	12.192	13.4993	14.2336	13.2331	13.5517	14.2719	12.3823	12.9814	13.2717	15.1634	13.5364	14.3205	13.1163
RAB1A_HUMAN	P62820	Ras-related protein Rab-1A	2	1	0.400794	1.2763	1	0.233109	0	0																					11.7289
CLH1_HUMAN	Q00610	Clathrin heavy chain 1	3	2	0.0538083	0.607233	0.552975	0.23361	0	0									10.9339					12.6531					12.3112									12.4104			11.8985					12.8684
PAPP1_HUMAN	Q13219	Pappalysin-1	90	89	0.319203	0.25802	0.371398	0.23404	0	0	12.6394	13.2366	11.0447	12.3476	11.5784	12.3243	12.1249	13.0485	11.2062	11.3192	10.8675	12.0086	11.3921	13.3692	10.8388	11.5516	11.9498	12.1527	12.516	13.0515	12.9087	13.1624	12.8575	11.5536	13.9793	12.9993	13.4784	12.9103	13.1269	10.304	10.5434	12.2668	11.7251	10.9727	13.7993	10.7617	11.4241	12.0108	12.7273
CDD_HUMAN	P32320	Cytidine deaminase	3	3	0.0533504		0.440545	0.234174	0	0										10.127
CLIC1_HUMAN	O00299	Chloride intracellular channel protein 1	8	7	0.731932	0.0640861	0.0203813	0.234508	0	+	10.5438	11.4606	11.219	10.7969	10.8557	11.3884	10.6202	11.7234	11.2657	10.6877	10.9339	11.0387	10.0157	11.6592	10.9024	12.0035	11.1026	10.7362	11.0928	11.0501	10.7546	11.63	10.6103	11.0898	11.1638	11.2879	10.1397	10.9958	11.3565	11.1263	10.9769	11.0581	11.0559	10.9506	11.6086	11.8858	11.1469	10.9928	11.1756
CAC1A_HUMAN	Q99792	Voltage-dependent P/Q-type calcium channel subunit alpha-1A	2	2	0.996271	-0.0193572	0.477228	0.235802	0	0						11.2879					9.66923		10.5417												10.7984			10.0407						10.2514		10.6267
MERTK_HUMAN	Q12866	Tyrosine-protein kinase Mer	3	3	0.735924	0.0745807	0.0365854	0.23819	0	+			11.2228	11.4976	11.2513	11.5116			11.2035	11.1388	10.3134			11.5635		11.4922	10.7028	11.3387	11.2863	10.7749	11.2224		10.9749	11.018	11.5569	11.3704	11.3239	10.8024		11.1025	11.1831						10.8556
CADH1_HUMAN	P12830	Cadherin-1	8	8	0.685052	-0.256803	0.661491	0.239142	0	0		11.6169		11.748	12.4135	11.7035									12.4497			12.9926								11.199			12.8087			12.3968
RASA3_HUMAN	Q14644	Ras GTPase-activating protein 3	2	2	0.239302		0.427249	0.239482	0	0																																				10.0302
ZPI_HUMAN	Q9UK55	Protein Z-dependent protease inhibitor	30	30	0.433532	0.0843375	0.00226151	0.239557	0	+	13.7912	13.2233	13.9574	13.8572	13.7755	14.7413	14.2208	13.6009	13.8498	13.9947	13.9295	13.8672	14.1485	13.63	13.8724	13.799	13.4566	13.4356	14.1797	14.3235	13.8644	13.1594	14.0171	13.6851	13.7267	13.7452	13.8288	13.9415	13.875	13.9158	12.8498	13.6571	14.156	14.3223	13.8594	14.4028	13.8421	14.0333	14.0252
TRFM_HUMAN	P08582	Melanotransferrin	2	1	0.982925	-0.117072	0.93642	0.24175	0	0						11.5352									11.0183					12.5019							14.2045
DCD_HUMAN	P81605	Dermcidin	3	3	0.53989	-0.25573	0.446354	0.243054	0	0				10.8936		11.5492			11.7985	10.4128				10.3955				10.5149	10.8051	10.7574													11.6276				11.3963
PDIA4_HUMAN	P13667	Protein disulfide-isomerase A4	7	7	0.500721	0.423646	0.789575	0.244418	0	0	15.0184	13.1033	12.075	11.8108		12.0367		11.9069	11.9614	12.1699		13.0207	12.8521	12.5563	11.9105	13.1714	17.1747	12.3861	12.6972	17.5659	12.8028	12.4098	15.8902	12.4243	12.5081	13.2453	12.9581		13.1814	13.3405		12.5554	12.6734		12.7033	12.6892	13.6871		12.8953
OAF_HUMAN	Q86UD1	Out at first protein homolog	2	2	0.733208	0.134059	0.281159	0.244582	0	0	10.7287																	10.9572		10.4391						10.8752											10.1725
G6PD_HUMAN	P11413	Glucose-6-phosphate 1-dehydrogenase	11	10	0.131551	0.206124	0.0558471	0.247134	0	0			12.3673	12.2059		12.6593		13.773	12.8674	12.8517	13.3297	13.068	11.8561		12.8534	13.4183	12.9412	11.9564	12.9372	13.2273	12.1688	13.4577		12.6558	12.1073	13.0316	12.1335	11.9307	13.343	12.3931	12.9745	12.9508	13.3226	12.7338	12.8822	12.2197	12.5751		12.1426
VGFR1_HUMAN	B3FR89	Vascular endothelial growth factor receptor 1	5	5	0.834666	-0.084803	0.284608	0.247545	0	0	10.8556	11.8374	10.4837	11.5317	11.9532	11.9851	11.5589		10.1309	11.87	10.6595	12.0255		11.8119		12.5195	12.2085	12.0611	12.3887	10.3735	11.045	11.2364	11.413	10.5051	11.9327		11.6169		11.2216	12.0035		11.8009	12.1898	12.1901		11.1498	9.64755	12.8801	11.6283
GSTO1_HUMAN	P78417	Glutathione S-transferase omega-1	10	10	0.960139	-0.0291149	0.0602526	0.248389	0	0	12.6382	12.7967	12.8936	12.5877	13.196	13.1344	12.403	12.2847	12.9715	11.6966	13.483	12.7938	12.9128	12.9878	11.7495	13.2074	14.2383	12.0192	12.1742	12.5311	11.6469	14.8478		12.6629	12.3338	13.1819	11.6667		12.9143	12.9509		14.3356	12.1867	12.8039	12.8305	13.3703	12.173	12.9373	13.2997
SREK1_HUMAN	Q8WXA9	Splicing regulatory glutamine/lysine-rich protein 1	3	3	0.960239	0.0357615	0.151745	0.248398	0	0	10.757	11.4716	9.77846	11.3162	11.6076	10.2421	10.3124	12.1984	11.4772	11.6983	11.3703	11.6077	11.0186	11.3763	11.5573	10.8152	9.99331	11.3738	11.6116	11.9299	10.805	11.0812	11.5038	9.96727	11.1904	12.1467	10.6637	11.1019	12.4022	11.5694	11.0472	11.7009	11.4959	10.5884	11.5303	11.0051	12.4537	11.3487	9.48808
GANAB_HUMAN	Q14697	Neutral alpha-glucosidase AB	12	12	0.999709	-0.00179343	0.00676101	0.25056	0	+	11.5689	12.3996	11.3179	11.2779	11.5469	12.4171	11.6814	11.6183	11.1499	11.7273	11.515	11.9677	12.6995	11.3577	11.6702	12.6361	11.6528	11.9929	11.7333	12.1891	10.9806	12.3501	11.6288	12.1379	12.0238	11.8064	11.4871	12.1155	12.1018	11.5077	11.9953	12.098	11.7261	11.8061	12.3995	12.3265	11.9795	12.1899	11.8377
NSF1C_HUMAN	Q9UI06	NSFL1 cofactor p47	2	2	0.904531	0.085583	0.322	0.251268	0	0									11.9547		12.8691		13.133							12.1443							12.1418				12.9903
G3PT_HUMAN	O14556	Glyceraldehyde-3-phosphate dehydrogenase, testis-specific	3	1	0.149205	0.301734	0.222951	0.253007	0	0	10.2664	10.4886	10.8459	10.9971		10.9587		12.2036	11.8768	9.75186	11.0976		11.1607	11.0193	10.3171	11.7375		10.7527		10.4656	11.063	11.296		11.3636		11.0387	10.4796	10.6041	11.8308	11.0899	11.043	11.416	10.9191	11.5256	11.3443	11.5934	11.7995		10.4414
PPM1A_HUMAN	P35813	Protein phosphatase 1A	3	2	0.948359	-0.0594316	0.413742	0.254162	0	0	13.0612		15.3692	15.0116		11.4569	12.3037		12.6035	10.8962	11.5855		11.8317	13.0001	11.2835	11.9953		13.2284	11.5915	12.566	11.8634	13.7933		11.5426	11.6998	12.6048		12.7482	12.9602		11.9079	12.6105	12.8645	14.623	12.5668		10.355	12.5232	12.0189
IBP4_HUMAN	P22692	Insulin-like growth factor-binding protein 4	8	8	0.883001	0.0334418	0.00143348	0.254433	0	+	10.2696			10.1592	10.0037			10.3957	9.78704		10.1447			9.93043	10.0959			10.3397	10.2195	10.2934	10.1524	10.146		10.3836		10.8306	10.4221	10.3207	10.6628			10.3248	10.0356	9.97807			9.84543
CFAD_HUMAN	P00746	Complement factor D	10	10	0.872247	0.032792	0.000770577	0.256748	0	+	12.3419	11.5657	11.7964	12.0496	12.0808	11.9749	11.886	12.3013	11.8945	11.9834	12.3404	12.0607	12.6233	12.5277	12.8119	12.3239	11.5334	12.5979	12.2293	11.9646	12.5705	12.0302	11.9199	11.9251	11.9804	12.3959	12.0359	12.2406	12.4395	12.0473	11.6645	12.154	11.9891	12.3068	12.1123	12.1131	12.0466	11.4585	11.9992
SNED1_HUMAN	Q8TER0	Sushi, nidogen and EGF-like domain-containing protein 1	4	4	0.599456	0.548375	0.888072	0.25711	0	0				11.3567										10.9751	10.2826
C1TC_HUMAN	P11586	C-1-tetrahydrofolate synthase, cytoplasmic	3	3	0.314541	0.747082	0.814909	0.257867	0	0	11.3268		10.9462																			12.123					11.1786
DYHC1_HUMAN	Q14204	Cytoplasmic dynein 1 heavy chain 1	2	2	0.158389	-0.231576	0.12423	0.258466	0	0		19.4522		19.4145	19.1423	19.3401		18.5662	18.2209	19.4711				19.0996	20.1682		19.9313	20.1865	20.2109	18.9545	19.892	18.6174	19.3529	18.62	19.2437	20.415	18.9355	18.6021	18.171	18.9388	19.6807	19.2828	19.0282	18.3208	19.2764	18.9235	18.5087	18.8697	18.8088
LKHA4_HUMAN	P09960	Leukotriene A-4 hydrolase	13	13	0.554317	0.184976	0.210818	0.260855	0	0	10.1936		10.7455	10.6983					9.01356						10.1204	11.6717					10.6795				10.4508		10.3576					11.0149	10.2037					10.837	9.7105
FKB1A_HUMAN	P62942	Peptidyl-prolyl cis-trans isomerase FKBP1A	3	3	0.955152	0.0644597	0.405056	0.262673	0	0			11.4472	11.2898																						11.1128								10.2921
LAMC1_HUMAN	P11047	Laminin subunit gamma-1	11	11	0.629719	-0.155422	0.287242	0.262744	0	0	17.9161	17.9575	17.4867	17.1389	17.1717	18.1597	17.0193	17.9984	18.198	17.1816			17.08	17.8976	17.4477	18.5259	18.2299	17.3586	17.8743	17.5165		16.354	16.7233	17.5982	17.4924	17.5321	16.0466	17.5781	17.8437	16.0467	17.6424	18.5365	17.1617		14.7348	18.4713	15.9359	18.0308	17.7458
LYSC_HUMAN	P61626	Lysozyme C	11	11	0.808131	0.0497185	0.00493074	0.263782	0	+	13.1629	12.3934	13.0915	13.3981	11.8988	12.8491	12.3959	12.7707	11.9035	11.829	12.6171	12.5524	12.7569	12.8588	12.798	12.6992	11.6783	12.0552	12.4723	12.928	13.1395	11.8879	12.3662	12.9734	12.4329	12.6739	12.6347	12.5402	13.2557	12.5985	12.4145	12.7206	12.6232	12.7131	12.8583	12.1707	12.6749	12.6326	12.392
GGH_HUMAN	Q92820	Gamma-glutamyl hydrolase	9	9	0.981852	0.0241976	0.0923993	0.264558	0	0	10.9567		10.9511	11.1252	11.2658	11.4642	11.2861	10.7184	12.4274		11.2535		11.7321		11.7012	11.5631			12.2405								11.7677	10.5563	12.0348	12.2304	10.6346	10.3099			11.3688	11.8638	10.2816		10.9117
GLGB_HUMAN	Q04446	1,4-alpha-glucan-branching enzyme	2	2	0.722053	0.0566606	0.482806	0.265299	0	0																							10.4933
LUM_HUMAN	P51884	Lumican	25	25	0.357458	0.10622	0.00264237	0.266877	0	+	15.9676	15.2438	14.9869	15.5967	15.3496	15.5052	15.2137	16.113	14.648	14.6338	15.3202	15.2989	15.5946	15.6032	15.517	14.4628	14.8467	14.9458	14.5829	15.5328	15.0329	15.2168	15.5178	14.9306	15.6131	15.5384	15.2003	15.35	15.5315	14.6583	14.8836	14.701	15.844	14.7995	15.4102	14.9685	14.5078	15.1019	14.9122
TENA_HUMAN	P24821	Tenascin	14	14	0.980915	-0.0223879	0.0602034	0.270116	0	0	12.9321	12.2469	12.4761	11.903		12.6665	12.002	13.3642		12.4129		11.7867	11.7762	12.8605	12.9523		12.6402	11.9063	12.1133	12.6666	12.5191	13.0261	12.4683	12.586	12.6892		12.301		12.8413			12.5388	12.6093	12.4022		12.3398		12.1913	11.9521
KCY_HUMAN	P30085	UMP-CMP kinase	2	2	0.49883	0.246076	0.355772	0.27195	0	0		10.9274	11.0486	11.6009		10.9935			10.4622	12.4329	10.9167			11.4023									10.8766						10.3412		10.3108	11.6533	11.8641	11.4172	11.5929		10.3665		9.53265
E41LB_HUMAN	Q9H329	Band 4.1-like protein 4B	2	2	0.843832	0.0796199	0.11831	0.271998	0	0	12.4366	11.5317			12.3994	11.9884		11.6985	11.2531	12.6604	11.7205	11.422			12.0475	12.8192			11.7353	10.7786	10.733	12.1066	12.0742			12.7853		11.7257	11.8232	12.2985		13.1605	11.3335		12.7801	12.2587	11.4892	11.6759	10.854
SAA4_HUMAN	P35542	Serum amyloid A-4 protein	9	9	0.0500526	-0.348132	0.134843	0.274222	0	0	15.8233	14.8047	14.4695	14.1	14.539	15.1632	13.9054	13.1353	14.7972	15.3588	12.9009	13.9194	13.4115	13.3707	14.3061	14.7966	13.51	14.3766	14.9732	13.8773	14.309	13.7264	14.2822	13.454	13.1579	14.5322	14.1576	13.1368	13.1811	14.7752	13.478	16.2767	14.2158	13.4039	13.5671	13.5853	15.1816	13.9624	14.9101
HMCN1_HUMAN	Q96RW7	Hemicentin-1	6	6	0.962011	0.0272764	0.0179481	0.274445	0	+		11.2073			10.9796	11.5687		11.3444	11.052	10.7671	11.6056		11.6966		10.8843	11.7582	11.4725	12.2943		10.5736				11.1966				11.3692	11.5036		11.1293		10.8009	11.3307		11.5454	11.1436	11.5187
LIS1_HUMAN	P43034	Platelet-activating factor acetylhydrolase IB subunit alpha	3	3	0.740243	0.229412	0.719563	0.275469	0	0			10.2978
INSRR_HUMAN	P14616	Insulin receptor-related protein	2	2	0.945604	-0.0596978	0.30446	0.276814	0	0	13.207	13.1361	13.1811	12.7936	13.3117	13.2382	12.3976	14.2464	13.9944	13.4241	13.6758	13.7674	13.5137	13.7111	13.3942	14.1778	13.621	13.5064	14.0358	13.5917	13.2195	12.7466	12.8641	13.9025	13.9741	14.5528	11.9655	13.9279	14.085	13.9667	14.5248	13.7923	13.3775	14.0536	13.343	14.0447	18.4065	13.9411	13.1883
PLSL_HUMAN	P13796	Plastin-2	43	36	0.472419	0.0841718	0.000751323	0.277258	0	+	11.9132	12.1536	12.6281	12.7421	11.9834	12.1246	11.6195	11.4745	11.6661	11.5302	11.6387	12.2309	12.0474	11.8149	12.0258	12.3126	11.9856	11.7273	11.5623	12.4644	11.8304	11.8131	12.279	11.8377	11.8506	11.5951	11.9186	12.0631	11.7608	11.9346	11.9468	12.3435	12.1788	11.5026	12.2052	11.7395	10.9812	12.4548	11.4466
NGAL_HUMAN	Q92683	Neutrophil gelatinase-associated lipocalin	6	6	0.994896	0.0399668	0.675734	0.279855	0	0			13.3053			10.1291															13.2537															13.2665
TIMP1_HUMAN	P01033	Metalloproteinase inhibitor 1	4	4	0.272778	-0.237586	0.075807	0.280572	0	0	10.132			9.86694		10.9698				9.84416																	10.9123	10.2918				10.9122		10.0806		11.1393			10.8331
RN216_HUMAN	Q9NWF9	E3 ubiquitin-protein ligase RNF216	2	2	0.637922	-0.144173	0.192258	0.283868	0	0	11.3856	11.2597	12.9827	11.9024	11.7012	10.7429		11.3836		11.0539	10.8277	11.2246		11.4542	10.8434	11.5184	12.1816	11.445	11.5117	10.8406		10.2996		11.7422	11.7416	12.2249	10.775	11.7305	11.6374	10.3947		12.3509	12.4999		12.042	12.5128		11.3403	11.2269
CBPN_HUMAN	P15169	Carboxypeptidase N catalytic chain	23	22	0.999825	0.00113517	0.000114242	0.28417	0	+	16.3235	15.8178	15.878	16.1498	15.9633	16.147	16.1906	16.0649	16.0884	15.9491	14.5988	15.3878	15.5137	16.0974	14.6497	15.405	15.8058	16.0964	15.2102	15.1919	16.3332	15.8656	15.8883	15.4373	16.2153	15.9057	16.6659	15.3209	15.7453	15.803	15.5372	15.3174	15.8617	16.0703	16.667	16.3227	15.965	14.9679	15.9923
EXT2_HUMAN	Q93063	Exostosin-2	7	7	0.973272	0.0355077	0.23227	0.285736	0	0						10.4876			10.2149													10.3171												10.1208		10.5593	10.251
MYH11_HUMAN	P35749	Myosin-11	6	1	0.998738	-0.0227258	0.00173277	0.287159	0	++						12.5464				10.6408
CORO7_HUMAN	P57737	Coronin-7	2	2	0.500507	-0.163094	0.790492	0.288036	0	0
LDHA_HUMAN	Q9UDE8	L-lactate dehydrogenase A chain	13	12	0.934465	-0.0453725	0.0755868	0.288912	0	0	12.8892	13.4595	14.2702	14.2979	11.4881	12.803		12.2188	12.4564		12.9829	12.8992	11.7332	12.152	11.8295	12.3157	12.554	11.6973	11.9575	12.6555	11.9056	12.1684	12.4204	12.5947	13.5315	12.9669	11.591	12.6106	12.8062	12.2445	12.2734	13.2942	13.1062	13.6298	12.6087	12.1266	11.2559	12.4984	12.8897
EXT1_HUMAN	Q16394	Exostosin-1	2	2	0.00773878		0.427401	0.289136	--	0			10.8689																			10.3662											11.2755	10.4843
ISK1_HUMAN	P00995	Pancreatic secretory trypsin inhibitor	2	2	0.785751	-0.151165	0.343023	0.294211	0	0	9.62831		10.1263	9.38968		10.503	9.61554		10.063											11.0385									10.4281								10.3596
NECT1_HUMAN	NECT1_HUMAN	NECT1_HUMAN	2	2	0.893667	0.110061	0.264809	0.297983	0	0					10.5644				11.7481	10.4369																										10.5576
NELL2_HUMAN	Q99435	Protein kinase C-binding protein NELL2	4	4	0.702615	-0.181467	0.660671	0.298363	0	0																									11.2137				11.4577				10.1462						10.7788
LEPR_HUMAN	P48357	Leptin receptor	2	2	0.298639	0.264059	0.196224	0.299795	0	0	11.0989	11.8558		11.0287		11.4011	10.6407	11.7758	10.0534		14.6528		12.6971	12.1742	11.5648		10.668	10.9896	11.0295	12.0579	11.563	11.878	11.7273	10.8209	12.8524	12.0724	12.2186	11.6064	11.9536			11.1736	10.7083		12.6503		10.2005		11.6109
CD97_HUMAN	P48960	CD97 antigen	2	2	0.992757	-0.0304484	0.485933	0.300644	0	0		16.5833						15.8983			16.5789		16.935									16.2945
QSOX2_HUMAN	Q6ZRP7	Sulfhydryl oxidase 2	3	3	0.970087	-0.0348801	0.103484	0.304237	0	0	12.3602	11.808	12.6505	11.2402	10.8065	13.559		12.0117	11.0644	12.8291	10.6954	10.8015	12.9987	11.1883	11.3065	13.6462	12.1502	13.1469	13.7651	10.7934	12.7177	11.3701	10.9536	11.6848	11.9893	12.7784	11.6647		11.8509	11.5661	12.5515	13.3731	11.334	11.4907			12.009	11.2468	12.2049
HMGB2_HUMAN	P26583	High mobility group protein B2	3	2	0.561174	-0.277042	0.499484	0.305007	0	0			11.4584	11.3431				11.0914	10.6512							12.2956															10.7491			11.4627		12.0055
RAC2_HUMAN	P15153	Ras-related C3 botulinum toxin substrate 2	3	1	0.0115491	0.838412	0.489827	0.30698	+	0	13.3206	13.2922	11.849	12.2559		13.5398	17.3093	9.50647			10.483			11.6743			11.9389	11.7896			11.2777	12.6487	11.4259	11.0271	11.6964	14.0386	12.2687	12.407		11.7026		11.359	11.9755		12.3362	13.4396		11.0011	12.5534
XRCC4_HUMAN	Q13426	DNA repair protein XRCC4	2	2	0.921013	0.0721986	0.249866	0.308442	0	0				12.9563	12.0254		10.4757			11.4415				11.6576			11.4606	11.308			11.0807	11.0255			12.094		11.1819	11.477		11.7939		12.3413				10.8985			11.8485
CAN1_HUMAN	P07384	Calpain-1 catalytic subunit	8	8	0.989032	-0.0405923	0.541802	0.310904	0	0	12.9424	11.3081	13.6365	11.2786	14.5281	11.7768	14.1146	10.2294	12.4213	14.5643	11.8131	11.7658	11.6867	12.6302	15.0374	11.6495	11.5017	15.5571	15.8564	12.7843	14.713	11.7878		11.3367	15.4983	14.6418	11.3035	14.58	14.4752	11.3807		15.1836	10.8762	11.5577	11.4649	11.866	11.3305		14.29
ERF3A_HUMAN	P15170	Eukaryotic peptide chain release factor GTP-binding subunit ERF3A	4	2	0.0579486	1.27224	0.855137	0.321471	0	0		10.1489		9.0258		10.4532	14.8448		9.55064		10.1432						9.58713			10.0897		10.3263					9.59969						10.6671						9.88089
PTN6_HUMAN	P29350	Tyrosine-protein phosphatase non-receptor type 6	7	7	0.841702	0.225956	0.481542	0.324153	0	0	10.7698					11.2219					11.8151											10.9756
CEAM1_HUMAN	Q9UQV9	Carcinoembryonic antigen-related cell adhesion molecule 1	2	2	0.0971651	0.425222	0.264726	0.324411	0	0	9.58209								9.38304					10.2922				9.74934			9.46427		9.98406				9.20859						9.93515			10.3071
CBLN1_HUMAN	P23435	Cerebellin-1	2	2	0.999845	0.00430496	0.444636	0.326416	0	0				10.5205												10.9847																		10.2714
CERU_HUMAN	P00450	Ceruloplasmin	285	282	0.0637413	0.148276	7.86e-06	0.328537	0	+	14.746	14.9268	14.9887	15.311	15.5063	15.595	14.6751	14.9075	14.9901	15.2663	15.4748	15.3968	14.9324	15.3386	15.3877	15.3805	15.1287	15.2188	15.1449	15.0203	14.5277	14.8344	15.5375	15.2867	15.6229	14.5756	15.285	14.707	15.2525	15.5439	15.1946	14.5732	15.4109	15.0624	15.695	15.5581	15.0661	15.4394	15.162
DAF_HUMAN	Q14UF3	Complement decay-accelerating factor	4	4	0.132129	1.12507	0.798342	0.328973	0	0						11.5065	10.9894			12.7216								13.1205	13.1864	14.2411	12.4619				12.5682					11.1966			11.2399
GPNMB_HUMAN	Q14956	Transmembrane glycoprotein NMB	3	3	0.160897	0.501538	0.415869	0.329278	0	0		12.0669		11.3201				13.0954	12.5281	10.4544	10.685									11.801		12.4822		11.1789					12.7601				11.5575
DKK3_HUMAN	Q9UBP4	Dickkopf-related protein 3	3	3	0.728837	-0.191669	0.0119871	0.330672	0	--	13.2192	12.8781	12.3833		12.6388	13.5734	12.9862	13.4334	12.2296			13.5573		14.8292	13.1319	14.3977	13.6038	13.2483	13.5596		13.248	13.3305	13.948	13.593	13.6126	12.9461	13.1756	13.5279		13.6181	15.0897	13.3306	12.395	15.2258		13.1438			12.714
APLP1_HUMAN	P51693	Amyloid-like protein 1	2	1	0.96786	0.137765	0.81641	0.331472	0	0	19.2915		17.2459					18.5406	18.3738		18.6491								18.3731		11.7781		18.8881	19.0285	12.099				19.3201				17.7949			18.1577		19.2214	17.5314
PAPP2_HUMAN	Q9BXP8	Pappalysin-2	7	7	0.602527	-0.290195	0.0242563	0.332557	0	++						12.6086													10.95							11.5607			12.2915		10.8428								10.9006
CD5L_HUMAN	O43866	CD5 antigen-like	15	14	0.704837	0.0977108	0.0230146	0.33418	0	+	13.8436	13.6144	13.5036	13.7949	13.1892	13.7054	13.3532	13.6105	13.6388	12.0761	13.4626	13.9422	13.8582	13.4756	14.1218	13.8364	13.3049	14.0776	13.3222	13.9506	13.642	14.0236	13.6759	14.6986	12.9649	14.0862	13.8976	13.6049	13.6622	13.2151	14.0228	14.1955	13.8557	13.6536	14.3788	13.1097	13.6323	14.3945	13.3795
ACTBL_HUMAN	Q562R1	Beta-actin-like protein 2	15	1	0.947107	-0.0465519	0.0687237	0.338251	0	0	15.843	16.0954	16.653	15.5269	13.0822	13.5906	12.0257	14.2462	15.2916	13.015	15.1534	15.2168	14.2374	13.8444	14.1362	13.8054	13.4814	14.3461	13.7948	14.6627	14.816	15.4764	14.8569	14.5363	14.7678	14.9565	13.8156	14.608	15.4446	14.0161	14.5819	14.946	15.3991	16.2015	15.0582	14.1101	13.3329	15.7111	13.8814
HYOU1_HUMAN	Q9Y4L1	Hypoxia up-regulated protein 1	15	15	0.928128	0.0500402	0.0405851	0.339022	0	+	11.5636	11.881	11.6391	11.855	12.5254	12.0104	11.547	11.3112		11.4945	12.0201	12.1245		12.0141	11.8571	12.7411	11.864	11.8077	8.65394	12.6188	11.703	8.88114	12.1367	11.8509	12.2119		12.1497	12.2736	11.2128	12.4164	12.0682	12.5468	11.8864	11.6723	12.5596	11.8623	11.163	12.4961	8.69248
DDR1_HUMAN	Q5ST11	Epithelial discoidin domain-containing receptor 1	3	3	0.556139	-0.169216	0.0801889	0.342568	0	0	12.4127	11.2515	11.8464	12.6875	13.1778	13.3083	12.331	12.5972	11.5777		13.7497			12.9464	11.4247	13.7254	13.3075		11.2642	11.7704	11.2467	12.0723		11.1523	11.8609	12.1413		11.3768	12.8938	11.616	11.6169	13.0371		12.2247	11.1812	14.5032	11.6618	12.4972	11.4753
TPIS_HUMAN	P60174	Triosephosphate isomerase	15	15	0.635821	-0.196456	0.210956	0.343298	0	0	10.1403	10.5174	11.2993	10.5378	9.97459	10.7139	8.82355		9.94369	9.51178	9.66732			10.3706	9.72151	11.1147	10.0699			9.85078		10.6586	10.5886			11.0283	10.682		10.4418	10.2613		11.0688		10.2734	10.3419	10.7362	10.2435	10.1611
KLKB1_HUMAN	P03952	Plasma kallikrein	63	59	0.497279	0.121688	0.00614799	0.343773	0	+	14.5053	13.4579	13.7621	14.4053	14.6268	14.3695	15.191	14.2583	14.0756	13.9126	15.0877	13.2157	13.5028	15.1604	13.9137	15.0899	15.6379	14.0184	13.6583	14.5024	13.623	13.7931	13.5587	13.712	14.1818	13.866	13.7647	13.444	13.731	13.6591	13.6192	15.4811	13.6507	13.7044	13.4491	13.8154	14.1797	14.8069	13.7925
ADHX_HUMAN	P11766	Alcohol dehydrogenase class-3	4	4	0.994916	-0.0309286	0.535674	0.344935	0	0		12.787		12.1344		12.1634					12.0356							12.5847			11.5592		12.6097				12.0162						13.3521						12.4388
CAZA2_HUMAN	P47755	F-actin-capping protein subunit alpha-2	2	1	0.722053	0.224298	0.384153	0.347565	0	0			10.2805	10.0211																															10.7838
GLU2B_HUMAN	P14314	Glucosidase 2 subunit beta	7	7	0.984709	-0.0262069	0.0784094	0.35139	0	0	14.2178		14.7561	14.3317		15.3707			14.0504	12.6141	13.8144			13.04		11.6646	14.5335	13.13	13.2773	13.8056		12.981	13.5193	13.8362		13.3699	11.4629	13.4529	14.143	13.5398			14.1841	16.2641		13.3213	12.5696	14.8596	12.2482
ROBO4_HUMAN	Q8WZ75	Roundabout homolog 4	2	2	0.819904	-0.117119	0.166079	0.354245	0	0	12.2761		13.1041	11.5276	13.8799	14.1833			14.0287	13.2084	12.6808	12.0704		13.9589		13.7321	13.6014	11.7062				13.0203		12.8424				13.5712		12.5336	12.6962		11.8074	13.191			12.9611	13.694	13.2423
ITIH3_HUMAN	Q06033	Inter-alpha-trypsin inhibitor heavy chain H3	70	68	0.529202	-0.09459	0.00033689	0.359707	0	+	14.9761	15.1377	14.4115	14.8151	14.4211	15.6047	13.9026	14.4797	14.8164	14.3187	14.7103	14.7203	13.477	14.9181	14.6755	14.8898	13.9313	14.5063	14.638	14.6712	14.712	14.8069	14.8538	14.6955	14.958	15.221	15.4379	14.5688	15.1906	14.3137	13.8174	14.4942	15.1186	14.98	15.0003	14.8933	15.1992	15.2311	14.8867
DCNL1_HUMAN	Q96GG9	DCN1-like protein 1	2	2	0.945122	0.0341879	0.00196066	0.359816	0	+		10.1079	10.4809		10.9074	11.4845	9.78499	10.4621	10.3852	10.8227	11.1784		11.3103	10.8787	10.1071		10.3592	9.13997	10.7792	10.6521	10.251	10.7292		10.8289		10.5893	9.87175	10.9109		10.6948	10.6423		10.1688	10.9954		11.2305	10.2997	10.6831	10.3621
B2MG_HUMAN	P61769	Beta-2-microglobulin	7	7	0.971645	0.0210732	0.000772676	0.360744	0	+	15.3745	13.4187	13.5567	14.1418	14.1191	14.1658	14.0293	15.5948	15.5323	14.7012	15.6231	14.6473	15.0637	14.8373	14.4648	15.0239	13.9709	15.4468	14.7607	14.3318	14.815	14.1352	14.5315	14.7813	14.3131	15.1968	14.1665	14.5006	15.2842	14.4478	14.3602	14.8345	14.8477	15.363	14.7907	14.7853	15.0331	14.9842	14.2742
THTM_HUMAN	P25325	3-mercaptopyruvate sulfurtransferase	2	1	0.314616	-0.201068	0.0214336	0.364649	0	+	13.3774	12.9536	12.5018	12.2727	12.8306	13.0509	11.7796		11.8955	12.9782		11.7952		11.5837	12.5289	12.7946	10.9492	12.3102	12.9901	12.5087	12.5717	11.3263	12.547	11.1567	11.3411	11.6532	12.6793	11.4751	10.9636	12.6451	11.3978	14.3305	12.1708	10.8096	11.4785	11.2054	12.4324	12.1428	12.9226
LYVE1_HUMAN	Q9Y5Y7	Lymphatic vessel endothelial hyaluronic acid receptor 1	6	6	0.983726	0.0672882	0.451915	0.369736	0	0	13.9691		13.9352	13.7347				13.7426	13.2733	12.9993	12.7617				13.5673					10.1461							13.4692	14.3855	13.4076							14.3319
ITIH5_HUMAN	Q96K70	Inter-alpha-trypsin inhibitor heavy chain H5	8	8	0.882292	-0.182996	0.0333417	0.372724	0	--		11.0691		10.7053		11.22									18.0815					9.98276										9.89524		12.8888		12.8381					11.4726
B3GN8_HUMAN	Q7Z7M8	UDP-GlcNAc:betaGal beta-1,3-N-acetylglucosaminyltransferase 8	4	4	0.340945	0.149919	0.00123638	0.376694	0	+	10.6477	10.4864	11.8415	10.6543	10.6439	11.3078	10.0823	10.0774	10.2829	10.172	10.6998	12.0624	11.8907	10.2839	10.0987	10.5862				10.2354			10.6243	10.8913					10.8879	10.9197	11.4403	11.9142	11.2577	10.6729	12.1882	11.4629	10.0819	11.1547
K1C17_HUMAN	Q8N1P6	Keratin, type I cytoskeletal 17	7	1	0.968608	0.0449435	0.171013	0.377841	0	0				11.4813				11.8576	11.569		11.3408													11.5711		12.0914				11.9002	11.9298		10.8093
SIA4A_HUMAN	Q11201	CMP-N-acetylneuraminate-beta-galactosamide-alpha-2,3-sialyltransferase 1	2	1	0.126837	0.902209	0.690036	0.381026	0	0																14.1539	15.5828							15.3721								11.8664	10.8295
FACR1_HUMAN	Q8WVX9	Fatty acyl-CoA reductase 1	2	2	0.999715	0.00335227	0.0322154	0.382259	0	+				10.4942				10.3584	10.7085		10.6422																		10.8776								10.6826
LYAM3_HUMAN	P16109	P-selectin	2	2	0.407414	0.12924	0.000571392	0.383895	0	+	11.8697	10.7817	10.1359	11.2775	11.8375	11.9902	10.7953	11.6264	11.294	10.0531	12.1887	11.2054	11.2289	11.8847	11.4772	11.7227	10.8807		9.66038	10.8902		10.98	10.8028	10.7431	11.3891	11.5179	10.3773	12.0703	11.2198	11.1266	10.8245	12.6114	10.8444	10.7729	11.1982	11.9669	11.6053	11.6914	11.0542
DOPD_HUMAN	P30046	D-dopachrome decarboxylase	4	1	0.592896	0.244754	0.155799	0.385366	0	0			10.5389	11.1703		11.6962		10.5495	10.7032	9.99016	9.98439				10.5512		10.0546									10.8579				10.6781
PXDN_HUMAN	Q92626	Peroxidasin homolog	2	2	0.0761498	0.432442	0.111822	0.393322	0	0								10.9064		10.6398																								10.5923			10.327
MMRN1_HUMAN	Q13201	Multimerin-1	8	8	0.552283	0.161078	0.021736	0.399971	0	+		10.8608				11.3583	10.4675										11.0403						11.1101										10.854				10.5679
G3P_HUMAN	P04406	Glyceraldehyde-3-phosphate dehydrogenase	19	17	0.999562	-0.00446155	0.0373289	0.404897	0	+	14.1531	15.0055	16.156	15.9197	15.2959	13.2158		14.8727	14.8853	15.2794	14.0687	14.3806	15.1306	14.5483	14.2618	16.0628	14.8346	12.3182	15.113	14.927	12.9174	14.4287	13.356	14.6793	14.7133	14.3977	10.6053	14.9183	14.9944	14.5843	15.2685	14.6354	14.251	15.4148	14.8404		14.6255	15.1685	14.7924
ITA2B_HUMAN	P08514	Integrin alpha-IIb	2	2	0.280806	0.319224	0.274625	0.408602	0	0					9.69949										9.83345			10.1318
GRN_HUMAN	Q9BWE7	Granulins	4	4	0.775929	0.168879	0.262167	0.413116	0	0			10.9301	11.07		11.3234					10.4257															10.8606
S10AB_HUMAN	P31949	Protein S100-A11	5	5	0.70306	0.635372	0.0282907	0.415245	0	++			13.0529	13.4955
LYAG_HUMAN	P10253	Lysosomal alpha-glucosidase	2	1	0.0215694	-0.497108	0.119179	0.416568	--	0	13.1067	9.97209	9.33557	10.1868		12.6941		10.0997	10.885	11.0456	11.8921			9.62775		10.3462			11.8114	10.1123		9.64296	9.79085	11.7238		11.1832	9.60802		11.2685	9.7504			10.4408			11.785	10.8662	10.5122
PILRA_HUMAN	Q9UKJ1	Paired immunoglobulin-like type 2 receptor alpha	2	2	0.444634	0.197526	0.0190541	0.418147	0	+	10.5169	10.8035			10.8478	10.956																10.7552	11.6146	10.7612			10.9997		10.8168	11.3725			11.191			10.8917
UGPA_HUMAN	Q16851	UTP--glucose-1-phosphate uridylyltransferase	3	3	0.904943	0.0837516	0.0615479	0.421715	0	0				11.3646		12.1038	10.4156	11.7736							11.4451				11.958						12.0943							12.7825	11.8055
NP1L1_HUMAN	P55209	Nucleosome assembly protein 1-like 1	3	2	0.998029	-0.00643559	0.000728537	0.423975	0	+	11.1083	11.9637	11.6663	11.7127	12.1529	12.8669	11.1984	11.3559	11.9199	12.4881	10.2012			12.0024	11.7094	12.6681	11.4237	11.5432	12.4443	12.2205		11.9697	10.6884	11.8886	12.1609	11.8275		12.2863	12.2069	12.1251	12.5034	11.9004	11.4717	11.8242	12.4068	13.078	11.9334	11.9939	11.7365
TSP1_HUMAN	P07996	Thrombospondin-1	49	46	0.999995	0.00034014	0.00212965	0.425035	0	+	10.8155	11.6345	11.3509	10.6052	10.8522	10.521	10.4282	9.50723	10.9868		11.1298	10.7292		12.6314	10.2167		10.7051			10.5682	10.3653	11.3378	9.58855	12.5464	10.8136	10.6819	9.48677	10.7039	10.6881		10.2269	11.4822	11.0215	11.8955	11.4284	10.7011	10.93	11.1613
AACT_HUMAN	Q6NSC9	Alpha-1-antichymotrypsin	101	97	0.982444	0.0135717	3.79e-06	0.42525	0	+	21.443	21.3307	21.3343	21.5098	21.9875	22.7003	21.5871	21.0969	21.363	21.7997	21.6206	21.2056	21.8654	21.1685	21.1173	21.8724	21.2577	21.0699	21.6313	21.5877	21.1592	21.4159	21.323	21.37	21.531	21.3597	20.7053	21.87	21.7117	21.6451	21.5672	21.5383	21.1613	21.2371	21.5261	22.481	21.4902	21.875	21.3092
LIRB5_HUMAN	O75023	Leukocyte immunoglobulin-like receptor subfamily B member 5	3	3	0.0826909	0.745373	0.287208	0.426645	0	0			12.3392	11.8019												12.2335				10.5967
MER34_HUMAN	Q9H9K5	HERV-MER_4q12 provirus ancestral Env polyprotein	2	2	0.100302	0.527226	0.016368	0.430135	0	+	10.3614		9.81533	10.1471	10.5514			10.2031	10.4049											10.0897					10.3424		10.2022
AGRA3_HUMAN	AGRA3_HUMAN	AGRA3_HUMAN	2	1	1	1.06816	0.948184	0.432166	0	0				10.174																							10.0627						10.3219
DJC13_HUMAN	Q9BWK9	DnaJ homolog subfamily C member 13	2	2	0.143591	-0.592834	0.266992	0.432332	0	0		10.4795	10.7822		12.4751	13.4311	12.9945		11.4854																		12.9581			10.5049		13.5615							13.4906
TFPI2_HUMAN	P48307	Tissue factor pathway inhibitor 2	2	2	0.158992	-0.767443	1	0.43658	0	0																									10.8512
FABPH_HUMAN	P05413	Fatty acid-binding protein, heart	2	2	0.292394	0.212751	0.0769858	0.438488	0	0															10.5799					10.673
ITIH4_HUMAN	Q14624	Inter-alpha-trypsin inhibitor heavy chain H4	132	130	0.928894	0.036322	0.000109616	0.44367	0	+	18.3177	17.657	18.4477	18.2677	19.235	19.1682	18.1994	17.6396	18.3255	17.9721	19.0803	18.0785	17.9028	18.7459	17.5933	19.1577	19.0118	17.4046	17.8156	18.0488	17.0272	18.5406	18.0276	17.8574	18.0198	17.8656	18.7564	17.7485	18.3787	18.1805	17.3357	18.694	17.952	17.305	17.4386	19.0918	18.4119	19.1221	18.1153
AFAD_HUMAN	Q9NU92	Afadin	2	2	0.409764		0.632765	0.444335	0	0
CR1_HUMAN	P17927	Complement receptor type 1	2	1	0.999849	0.00270776	0.0811	0.445896	0	0														10.5403	10.5185					10.6017
CAD13_HUMAN	P55290	Cadherin-13	3	3	0.217917	0.361609	0.0726389	0.447142	0	0			10.6161	10.1599		11.5172		11.3852	11.2319		10.8633			10.1492		11.2829				9.74699				11.0078			10.6449		10.9752				10.8466			11.3081	10.4324
PTPRC_HUMAN	P08575	Receptor-type tyrosine-protein phosphatase C	4	4	0.0533504		0.17998	0.449211	0	0										10.5538																							11.191			10.7552
KAD1_HUMAN	P00568	Adenylate kinase isoenzyme 1	4	4	1	0.36312	0.182665	0.455636	0	0			11.8485
UGGG2_HUMAN	Q9NYU1	UDP-glucose:glycoprotein glucosyltransferase 2	3	2	0.343976	-0.746868	0.326721	0.45731	0	0
PSMD2_HUMAN	Q13200	26S proteasome non-ATPase regulatory subunit 2	3	3	0.254854	0.441889	1	0.458481	0	0
TBCD1_HUMAN	Q86TI0	TBC1 domain family member 1	2	1	0.319393	0.434935	0.00646733	0.461392	0	++					10.5662	10.1874				10.6378										11.0502																10.9724
AGRIN_HUMAN	O00468	Agrin	3	3	0.981836	0.0285295	0.011353	0.472132	0	+	13.3326	13.8531	13.1401	12.9969	13.1807	12.3975	10.3797	11.4786	12.4748	11.4168	10.8304	13.5185	11.8832	13.9264	10.8701	12.0913	12.6842	11.1672	12.9275	13.2894	12.0923	13.1658	11.3831	12.2365	11.8905	12.3128	10.9402	12.4611	12.5255	12.4416	12.7239	14.0619	12.9934	13.992	12.7658	11.6916	10.7268	13.2698	12.6284
NOTC1_HUMAN	P46531	Neurogenic locus notch homolog protein 1	2	2	0.179348	-0.458644	0.224008	0.47335	0	0		13.6659	12.8514	12.5961													13.1898	13.3865			12.9711	12.4317								13.4596				12.8081
FCGBP_HUMAN	Q9Y6R7	IgGFc-binding protein	92	92	0.771105	0.0718933	6.03e-05	0.485936	0	+	11.451	12.8042	12.4866	12.1008	12.9839	12.6624	12.2035	12.2059	12.1649	12.4145	11.5055	12.532	13.3478	12.2743	12.3257	13.0698	12.3488	12.4718	12.4822	12.6162	12.0378	12.6239	12.2191	12.3768	12.8011	10.7504	13.1876	13.5813	12.2759	12.5973	12.8897	12.7035	12.2727	13.3659	12.9585	12.5743	12.3358	13.0682	12.5751
FINC_HUMAN	Q96KP7	Fibronectin	139	139	0.0672285	0.444338	0.0351328	0.488552	0	+	13.037	15.7008	11.0916	10.5455	11.2191	10.6566	11.9148	12.1655	12.0829	10.2304	11.2287	12.2957	12.3083	11.6723	11.4116	10.3748	11.981	14.562	10.5876	13.6847	13.3139	12.8685	12.831	12.6258	11.1213	11.2221	12.9183	11.189	12.0466	13.7492	10.6412	10.6687	13.2957	13.3348	13.1751	12.5394	11.56	11.8584	12.7205
C1QR1_HUMAN	Q9NPY3	Complement component C1q receptor	2	2	0.591197	0.135155	0.00215083	0.490156	0	+	15.2749	13.9404	14.0037	14.8283	15.522	15.292	14.7319	15.1976	14.2614	14.3213	15.9993	13.4349	14.4434	15.1314	14.6808	15.5653	15.4299	13.5557	14.4871	15.1766	14.1043	13.7958	14.1559	14.4	14.867	14.2374	13.4519	14.6082	14.8266	13.6035	14.3722	15.5603	14.9427	13.1641	14.0783	15.0084	14.1148	15.7697	14.3188
TXND5_HUMAN	Q8NBS9	Thioredoxin domain-containing protein 5	2	2	0.985466	-0.0781534	0.661522	0.503524	0	0																																11.7447
DESM_HUMAN	Q8NEU6	Desmin	5	1	0.233945	0.720372	0.441402	0.507101	0	0	18.6659	18.0106	19.078	19.1661		12.0424	18.5408			18.3775	19.0377	18.1171	18.2901	18.3298	16.313	19.0426	19.2936	10.7103	10.9424	15.633		19.2027	18.6377	16.6279	14.4861	15.0997	18.9078	19.1376	15.3395	19.2383	16.4363	19.4885	18.4679	17.3288	19.1131	18.1522	15.9973	18.6848	19.1212
PRAP1_HUMAN	Q96NZ9	Proline-rich acidic protein 1	4	4	0.979733	0.100034	0.760193	0.50791	0	0		11.2668							12.5801		11.5512				11.4273			11.6218				12.6675			11.2065							11.4356		11.7907
ANX11_HUMAN	P50995	Annexin A11	3	2	0.983948	0.0723102	0.299043	0.508277	0	0				12.7131				10.6791			11.9808				9.90089									10.5821		13.4881				12.9546			12.6943	12.6308
MOES_HUMAN	P26038	Moesin	39	27	0.767638	0.0960462	0.00156959	0.508515	0	+	10.9574	10.6517	11.3707	11.6043		10.0392			10.6988			10.9545		10.6912		11.2913				10.825		9.87983	10.3501	10.6069			10.1655			10.1331	10.6011	10.8436	10.5847	11.6875	10.4214	10.1815		10.7511	10.1751
MUC2_HUMAN	Q02817	Mucin-2	2	2	0.570096	0.197063	0.0490208	0.509272	0	+											11.804													10.38			10.1697	11.2162			10.7317	11.1134				11.0592	10.8638
IGHA1_HUMAN	P01876	Ig alpha-1 chain C region	2	1	0.24606	0.414903	0.125183	0.520191	0	0						10.8526																												10.4248			9.28285
PROF1_HUMAN	P07737	Profilin-1	18	18	0.993457	0.0211105	0.0320424	0.522073	0	+	11.9173	13.2634	13.9966	14.1073					11.6744		11.3671	12.1883		11.7794	10.8007			10.9802		12.6311	11.6839	12.4143	11.7976	11.6135	11.2473		10.8895	12.2423	11.1479		12.2312	11.8412	12.0308	13.3485				12.6596
A4_HUMAN	Q8WZ99	Amyloid beta A4 protein	7	5	0.922612	0.188098	0.509591	0.529944	0	0		18.1272	17.2459			17.8673		18.4492		15.7589	19.2839			18.2101					16.7697		11.7781		17.9681	18.4917	12.099								17.7949			18.1577		19.2214	17.7569
PEO1_HUMAN	Q96RR1	Twinkle protein, mitochondrial	2	2	0.722053	0.956587	0.0174317	0.532577	0	+				10.9611			10.8792													10.8603														11.2002
A2GL_HUMAN	P02750	Leucine-rich alpha-2-glycoprotein	28	27	0.80688	0.0752742	0.000110965	0.536457	0	+	18.5796	17.4647	17.917	18.0693	18.9945	19.8998	18.0836	18.0292	18.2333	19.0785	17.8511	17.9171	18.1154	17.8819	18.1362	18.6931	17.72	17.5931	18.5135	17.7121	17.8615	17.7809	18.1973	17.7481	18.2536	17.37	17.1929	19.2968	18.053	18.1367	18.5846	17.8812	18.3902	17.4574	17.7229	19.4118	18.2757	18.4867	17.5643
ACTA_HUMAN	P62736	Actin, aortic smooth muscle	35	1	0.971627	0.0485131	0.0374785	0.541437	0	+	15.6528	16.2705	17.2179	17.148	12.1094	13.1483	11.2183	12.6404	14.2776	12.2599	14.4707	15.9622	13.348	14.0915	13.4364	13.6498	13.3119	13.3505	12.6688	15.1103	14.392	15.896	14.5985	14.0688	13.8322	13.6971	13.5846	14.5285	14.1253	13.7431	14.5238	14.4838	15.6896	16.8961	15.1103	13.6004	12.2619	15.8294	13.1763
BEND3_HUMAN	Q5T5X7	BEN domain-containing protein 3	2	2	0.175789	1.25265	0.653443	0.549533	0	0					10.2536				10.1759					9.59946		12.3272	9.813			10.3449			10.4244	9.85168										10.0536	13.2569
ITLN1_HUMAN	Q8WWA0	Intelectin-1	5	4	0.559136	0.226597	0.0652779	0.553043	0	0		11.0082				11.1377		11.1811		10.7412																	10.6564			11.0469			11.6014						11.0766
B3AT_HUMAN	P02730	Band 3 anion transport protein	4	4	0.398043	0.941479	0.680979	0.553346	0	0						10.9289									12.1246			17.1668	10.6214	14.0635
PKHL1_HUMAN	Q86WI1	Fibrocystin-L	3	3	0.00259793	2.02996	0.439154	0.566048	+	0			11.3021																	12.5214			12.2803				12.4037
OIT3_HUMAN	Q8WWZ8	Oncoprotein-induced transcript 3 protein	3	3	0.876664	-0.173162	0.268792	0.585681	0	0			12.0728	12.1759		11.3857									12.0085
S10A4_HUMAN	P26447	Protein S100-A4	3	3	0.912105	0.130069	0.218961	0.589106	0	0			11.9452	12.0172		12.6922		11.866	11.5093																							11.3713
IC1_HUMAN	Q96FE0	Plasma protease C1 inhibitor	55	54	0.813038	-0.10879	0.00445855	0.591731	0	+	17.6769	14.9965	16.6392	17.4847	18.0037	17.5852	17.9571	16.578	15.2547	16.1042	18.4279	15.4728	16.6115	17.5504	16.2837	17.7955	17.8996	14.2749	15.8924	17.336	14.8982	15.2155	15.3608	15.0133	16.4756	16.0666	14.6086	16.3882	17.0187	15.5267	15.5213	17.2923	15.2699	15.0113	15.27	18.9754	14.7088	17.2991	15.6828
PGK1_HUMAN	P00558	Phosphoglycerate kinase 1	27	23	0.988913	-0.0150229	3.5e-06	0.600821	0	+	15.1206	14.6246	14.1584	14.5542	14.9511	15.8563	13.7828	16.0235	14.5316	14.9006	15.9745	14.931	16.2969	14.8786	14.1256	15.397	14.1624	14.6396	15.1159	14.3665	14.7018	14.6311	14.4081	15.1416	14.5802	14.1487	13.902	15.8273	14.2872	14.3908	15.7301	15.2624	14.9582	14.5241	14.795	16.4539	15.0666	15.1107	15.0673
EHBP1_HUMAN	Q9NWI9	EH domain-binding protein 1	2	2	0.486132	0.270697	0.00926546	0.603232	0	--		10.664							11.3063	11.5541								12.8133	12.0657				10.5097		11.1122	11.2183			11.0794
GSTP1_HUMAN	P09211	Glutathione S-transferase P	10	10	0.699086	0.248157	0.108872	0.603269	0	0	9.96701		11.4751	11.5398		9.73543																10.1727					9.66578					9.70033		10.1879
TCTP_HUMAN	P13693	Translationally-controlled tumor protein	3	2	0.722053	-0.1293	0.649575	0.60714	0	0								10.121													9.5972	10.2359
VWF_HUMAN	P04275	von Willebrand factor	103	103	0.308029	0.159048	3.22e-06	0.607501	0	+	10.9119	11.2661	11.0486	11.397	9.85528	10.9745	9.78118	11.3728	10.8714	9.5532	10.8209	10.8681	10.6537	10.4834	10.9305			11.0734	10.6968	10.6068	11.4206	11.1318	10.2844	10.9319	11.1716	10.6892	11.4764	10.7439	10.8763	10.2459	10.2843	10.8849	11.7913	11.1103	11.4609	12.8837	10.2812	10.54	10.0043
APOC3_HUMAN	P02656	Apolipoprotein C-III	23	23	0.634245	-0.168727	0.00479682	0.609918	0	+	17.6333	17.2634	16.3855	16.0559	16.9314	16.6783	16.1738	15.1063	16.1751	17.1708	15.3442	16.653	16.1726	16.5808	16.6059	17.2365	16.6464	17.6223	17.8488	17.38	17.5834	16.0798	16.8069	16.005	17.0479	16.4403	17.4878	15.3281	16.3379	16.4478	16.0855	18.8422	16.5332	16.2507	14.0385	15.099	16.854	17.4064	18.3236
OLFM4_HUMAN	Q6UX06	Olfactomedin-4	2	2	0.952506	-0.0761651	0.101865	0.613258	0	0														10.4375	10.3334					11.0007	10.1368													10.9564
CO5A1_HUMAN	P20908	Collagen alpha-1(V) chain	3	3	0.288934	0.63158	0.376681	0.615185	0	0											13.0527			11.7285	9.59403									11.869									11.3585	11.8767			11.9041
LYAM2_HUMAN	P16581	E-selectin	2	2	0.409764		0.106094	0.61585	0	0																11.2035
TYK2_HUMAN	P29597	Non-receptor tyrosine-protein kinase TYK2	2	2	0.869986	-0.164607	0.103402	0.616691	0	0						10.5765					10.826				10.1902			10.5351
HNRPF_HUMAN	P52597	Heterogeneous nuclear ribonucleoprotein F	2	1	0.0709364	0.751245	1	0.616874	0	0					11.0988
FLNA_HUMAN	P21333	Filamin-A	85	77	0.59825	0.109316	4.18e-06	0.61932	0	+	12.8608	12.3765	13.3273	13.4011	13.6737	14.6743	12.5026	12.7555	13.0553	13.3181	12.6743	13.1277	12.6976	13.4529	12.5901	14.3884	12.8517	11.9412	12.7325	12.6738	12.5721	12.8894	11.6373	13.1947	13.1513	12.5443	12.4356	13.5713	13.2274	12.914	13.1782	13.3367	13.1013	13.5347	12.5323	14.3513	13.5999	14.0196	12.6015
ANAG_HUMAN	P54802	Alpha-N-acetylglucosaminidase	14	14	0.998362	-0.0287374	0.481984	0.621257	0	0	10.3836			10.0487	13.018				10.0623						15.4679				10.4925	10.3777			10.5671	10.08	16.2022		9.98056			10.4734			10.3763			10.304
GSTM2_HUMAN	P28161	Glutathione S-transferase Mu 2	3	2	0.470637	0.107917	2.69e-06	0.62566	0	+	14.0418	14.1223	13.6427	14.2846	14.7438	14.5566	13.9986	13.9141	13.8301	13.6755	14.3753	13.5307	14.3057	13.644	13.4757	14.2391	13.8331	13.3718	13.9304	13.6221	13.4911	13.8618	14.4991	14.1827	14.0832	13.5689	13.2134	14.1192	14.4104	14.2357	13.9149	13.8191	13.984	13.5674	13.7128	15.3272	14.0614	14.3805	13.6725
ECI1_HUMAN	P42126	Enoyl-CoA delta isomerase 1, mitochondrial	2	2	0.686899	0.500329	0.594284	0.625853	0	0	19.3224																			19.9632
ICAM3_HUMAN	P32942	Intercellular adhesion molecule 3	3	3	1	0.842188	1	0.658777	0	0															16.1236
ILEU_HUMAN	P30740	Leukocyte elastase inhibitor	13	13	0.813321	0.350708	0.000811119	0.660348	0	++																																	10.0056
MRM2_HUMAN	MRM2_HUMAN	MRM2_HUMAN	2	2	0.42924	0.33207	0.0352874	0.662788	0	+	10.824	12.7309	13.4353	13.384	12.2039	13.7183				10.7421	11.3415	10.275	10.6573		10.8749	12.0569	11.8379	11.242	10.9418	11.5102	10.928	14.4329			11.3986	11.8139	13.8583	12.8296	11.9326	13.6721		13.4607	11.6928		12.2044	13.2125		11.5565	13.0349
DCBD1_HUMAN	Q8N8Z6	Discoidin, CUB and LCCL domain-containing protein 1	3	3	1	0.352341	0.114684	0.676596	0	0								10.3313			10.589																												10.4887
CN037_HUMAN	Q86TY3	Uncharacterized protein C14orf37	2	2	0.506836	0.160143	1	0.685075	0	0
APOC2_HUMAN	P02655	Apolipoprotein C-II	12	12	0.409843	-0.230338	0.000746052	0.693624	0	+	19.5061	18.426	18.112	17.533	17.8077	18.8262	17.4705	16.8682	17.6733	18.5474	17.0909	18.4521	18.6113	17.6632	17.8354	18.6613	17.3595	18.082	19.2282	18.4621	18.3337	17.6869	18.274	17.3987	17.5045	18.4272	18.4733	15.5392	18.0295	18.3784	17.8919	20.7568	17.802	16.9828	16.2542	15.2232	18.7477	18.8035	19.3203
MA1A2_HUMAN	O60476	Mannosyl-oligosaccharide 1,2-alpha-mannosidase IB	2	2	0.941529	0.512587	0.834041	0.735869	0	0								10.2251						12.2378	17.057																		17.1591
LBP_HUMAN	P18428	Lipopolysaccharide-binding protein	29	29	0.97228	0.0320768	6.9e-06	0.752724	0	+	14.7372	14.197	14.4214	15.4156	15.464	16.5774	14.788	13.3876	14.8533	15.1077	13.9342	14.5958	15.605	13.9664	14.6684	14.9886	14.0553	12.8202	14.542	15.0745	14.9385	14.8249	14.499	14.5116	14.6905	14.344	14.343	14.5698	14.8338	14.8873	13.0704	13.6851	14.577	14.6415	13.497	15.0803	13.8659	15.4181	14.7054
LRC59_HUMAN	Q96AG4	Leucine-rich repeat-containing protein 59	2	2	0.354792	0.459043	0.130687	0.757703	0	0																													10.5556					10.7467
TRFL_HUMAN	Q9UCY5	Lactotransferrin	43	41	0.393204	0.444791	0.0151542	0.768369	0	+			11.1285	11.2634																	10.4823															10.9858
2AAA_HUMAN	P30153	Serine/threonine-protein phosphatase 2A 65 kDa regulatory subunit A alpha isoform	3	2	0.927521	0.116158	0.05603	0.784879	0	0		10.8971	11.2919	11.3956		10.056		10.3293	12.2395	12.1114				8.6368	11.6071		10.6386	12.9389		11.5298	12.3418				12.2061	13.437			11.6741			10.7795	11.226			10.5926	10.9163
APOC1_HUMAN	P02654	Apolipoprotein C-I	24	24	0.431411	-0.271083	0.000771785	0.839701	0	+	15.8467	14.7702	13.064	13.7148	14.5556	14.8566	14.0377	12.1932	13.5154	14.1433	12.1596	14.5737	14.338	14.3167	14.2064	13.9894	14.1017	14.3602	14.797	14.293	13.6174	14.3169	14.5433	13.5752	13.8968	14.3318	14.4686	13.0534	13.9423	13.9721	13.5947	17.7499	14.3895	13.1114	12.7142	10.8431	14.7547	14.6556	15.1141
ENOA_HUMAN	Q6GMP2	Alpha-enolase	25	24	0.819373	0.223129	0.0115274	0.877722	0	+			12.5802	12.1212	11.2267	11.2293														10.9568	10.2127											12.2763		10.8171		10.0276
CO1A2_HUMAN	Q9UML5	Collagen alpha-2(I) chain	3	3	0.747723	-0.538366	0.597462	0.888392	0	0		12.6433
ILRL1_HUMAN	Q01638	Interleukin-1 receptor-like 1	3	3	1	1.33626	0.182665	0.931641	0	0
TFF2_HUMAN	Q03403	Trefoil factor 2	3	3	0.797522	-0.440408	0.221398	0.958702	0	0
BAHC1_HUMAN	Q9P281	BAH and coiled-coil domain-containing protein 1	3	3	0.381763	0.456981	0.00720342	0.961934	0	+	10.6786			12.2205	14.2259	14.2554	11.7732		11.8804	13.4565			12.841			12.5397	16.6846		12.4429						12.0291					12.2229				12.4447		15.1754	11.2012		11.3088
MYH7_HUMAN	Q92679	Myosin-7	6	2	0.917287	-0.341024	0.445036	0.976749	0	0								11.5																				11.6435	12.7293
MMP9_HUMAN	P14780	Matrix metalloproteinase-9	4	4	0.462685	0.760705	0.104564	0.989783	0	0												11.422	12.0999		10.6901					11.0372				10.3733												10.7453			10.9821
A2ML1_HUMAN	A8K2U0	Alpha-2-macroglobulin-like protein 1	2	1	0.239302		0.109029	1.01846	0	0
S10A9_HUMAN	P06702	Protein S100-A9	22	22	0.773657	-0.260991	0.0238882	1.02155	0	+		16.5303	19.4064	19.3088	12.4941	14.007	12.151	14.7414	14.0512	12.7632	13.4669	15.6922	12.4772	14.8393	16.2249	14.0576	12.3869	13.8915	14.3467	16.1457	16.3819		11.8238	12.341	16.36	15.1892	14.251	15.1296	15.5503	16.7401	14.705		16.6867	14.1689	16.2067	13.7109	12.7169	12.8657	12.3109
GMFB_HUMAN	P60983	Glia maturation factor beta	4	2	1	1.32345	0.0649825	1.07006	0	0
SDK1_HUMAN	Q7Z5N4	Protein sidekick-1	2	1	0.490192	-0.767191	0.188662	1.08192	0	0																				14.1747				14.773	13.5927	13.114						13.2699		12.9518
SDK2_HUMAN	Q58EX2	Protein sidekick-2	2	1	0.490192	-0.767191	0.188662	1.08192	0	0																				14.1747				14.773	13.5927	13.114						13.2699		12.9518
FLNC_HUMAN	Q14315	Filamin-C	14	6	0.239302		0.000224857	1.17674	0	++											10.8313
DPYL2_HUMAN	Q16555	Dihydropyrimidinase-related protein 2	2	1	0.844253	-0.128092	1	1.22561	0	0
ANXA1_HUMAN	P04083	Annexin A1	25	25	0.137106	1.32786	0.0629143	1.22882	0	0			13.526	13.6005											9.40726					10.3712	9.89862												10.0888
SAA1_HUMAN	Q3KRB3	Serum amyloid A-1 protein	12	5	0.61769	-0.254565	6.04e-05	1.23694	0	+	12.3035	11.2736	11.0736	12.6315	14.9047	14.3621	11.7202	10.7932	11.2942	12.012	12.5014	13.126	11.3507	10.4122	11.0265	14.1524	11.9392	11.8481	12.9201	11.5844	13.2017	12.1619	12.9199		13.5913	11.438	11.8608	11.1598	11.4388	12.9647	11.6331	15.5038	12.3489	13.6015		13.2457	11.6709	13.5011	11.3157
S10A8_HUMAN	P05109	Protein S100-A8	19	19	0.582841	-0.432939	0.0118912	1.28189	0	+	11.6751	15.7891	19.1592	19.0214	10.5911	12.8685	12.5578	12.7529	11.5283	11.1512	12.4428	14.9364		14.0404	15.1938	13.1148		12.3555	12.8965	15.6132	15.588		10.1969	11.6706	15.5533	12.2851	12.7806	14.168	14.3884	15.6442	13.4534	12.2266	15.5785	12.657	15.2615	12.0035	10.246	11.1183
ASAH2_HUMAN	Q9NR71	Neutral ceramidase	5	2	0.847111	0.413583	0.144589	1.31832	0	0	10.9724				14.9783			10.802		10.5559	11.3884			15.7987	14.5077			14.6132	15.4715			10.8164		10.5788		11.3872				11.0795				15.044
SAA2_HUMAN	Q16879	Serum amyloid A-2 protein	11	4	0.640061	-0.240458	1.26e-05	1.34337	0	+	12.2271	11.5893	11.0601	12.6341	14.636	14.412	12.1384	10.7932	11.31	11.9491	12.5014	13.0069	11.7654	10.4122	11.0265	14.3471	11.967	11.6742	12.8403	11.837	13.2017	12.2977	12.993		13.4615	11.438	11.7339	11.1669	11.4388	12.9515	11.4197	15.5886	12.2989	13.574		13.2189	11.7687	13.724	11.412
AMD_HUMAN	Q86U53	Peptidyl-glycine alpha-amidating monooxygenase	2	2	1	-0.270232	0.343865	1.37257	0	0																							10.6964
SUMO2_HUMAN	P61956	Small ubiquitin-related modifier 2	2	1	0.258935	-6.46519	0.898266	1.39024	0	0
CRP_HUMAN	P02741	C-reactive protein	23	23	0.999988	0.00138119	3.53e-05	1.43822	0	+	17.9891	14.5796	16.016	18.2206	20.0193	20.296	18.9897	16.1218	16.7598	19.4845	16.8282	15.9282	18.9792	13.4158	16.4659	18.3231	15.3693	13.7105	18.0965	15.9236	16.9413	16.8814	16.8321	15.8954	17.7385	15.5262	13.906	18.6522	16.5274	18.2908	15.581	14.9946	15.7877	18.027	16.5547	20.1204	16.056	18.7529	16.8603
CHD7_HUMAN	Q9NXA0	Chromodomain-helicase-DNA-binding protein 7	2	2	0.13878	4.1302	0.569394	1.54255	0	0																					11.5811
DHX40_HUMAN	Q8IX18	Probable ATP-dependent RNA helicase DHX40	2	2	0.865298	-0.572053	0.390984	1.65032	0	0	5.65377						7.35572						11.8868				11.3718			7.55871						11.8611
CH3L1_HUMAN	P36222	Chitinase-3-like protein 1	11	11	0.65331	0.963753	0.134163	2.18217	0	0		16.7549		10.2789					9.58391	10.0546					10.3933					10.7622	9.66317		17.6221			16.0185	16.6001			10.0981	15.7478		10.1558		17.4073	15.2124
TCPE_HUMAN	P48643	T-complex protein 1 subunit epsilon	2	2	0.452101	1.68532	0.182665	2.20894	0	0											10.1702
IQGA2_HUMAN	Q13576	Ras GTPase-activating-like protein IQGAP2	3	3	0.198681	-0.802987	0.0764671		0	0	11.0397																						12.1983													11.3837
SPG17_HUMAN	Q6Q759	Sperm-associated antigen 17	2	2	0.422458	-0.742351	0.386017		0	0										10.9041
AGRF5_HUMAN	AGRF5_HUMAN	AGRF5_HUMAN	4	4	0.606275	-0.642222	0.128827		0	0						12.1001		12.0896									13.4704
CPMD8_HUMAN	Q8IZJ3	C3 and PZP-like alpha-2-macroglobulin domain-containing protein 8	2	2	0.699039	-0.398657	0.0764671		0	0											11.5957															11.8312				11.0385
CPNE3_HUMAN	O75131	Copine-3	5	5	0.724659	-0.092998	0.00604519		0	--										11.4848								11.752		11.1228		11.3367
CAB45_HUMAN	Q96AA1	45 kDa calcium-binding protein	2	2	0.932147	-0.0673469	0.220131		0	0														9.82944
FERM2_HUMAN	Q96AC1	Fermitin family homolog 2	2	2	0.882896	0.0477298	0.0764671		0	0									10.0085																											10.9665
ENPP1_HUMAN	P22413	Ectonucleotide pyrophosphatase/phosphodiesterase family member 1	2	1	1	0.135514	0.128827		0	0																																		11.4932
KSYK_HUMAN	P43405	Tyrosine-protein kinase SYK	2	2	0.53306	0.256274	0.220131		0	0	10.6723																																11.1688
PNCB_HUMAN	Q6XQN6	Nicotinate phosphoribosyltransferase	4	4	0.722053	0.318581	0.0764671		0	0				9.54627		10.5804
INHBC_HUMAN	P55103	Inhibin beta C chain	2	2	1	0.653892	0.128827		0	0								10.8216																										17.3912
LRBA_HUMAN	P50851	Lipopolysaccharide-responsive and beige-like anchor protein	2	2	1	0.991692	0.128827		0	0																				10.3499
TYB4Y_HUMAN	O14604	Thymosin beta-4, Y-chromosomal	2	1	1	3.68499	0.220131		0	0				9.86324
PPM1F_HUMAN	P49593	Protein phosphatase 1F	2	2	1	4.14043	0.128827		0	0			10.2797
STAB1_HUMAN	Q9NY15	Stabilin-1	2	2	0.0202668		0.0165933		--	--															10.7307		10.8766			11.2153							10.9541
AT8B1_HUMAN	O43520	Probable phospholipid-transporting ATPase IC	2	2	0.143363		0.128827		0	0											10.9622																									10.864	10.6053
CMGA_HUMAN	P10645	Chromogranin-A	2	2	0.143363		0.128827		0	0																				10.3816				10.4525
DYH1_HUMAN	Q92863	Dynein heavy chain 1, axonemal	2	2	0.239302		0.220131		0	0
GXLT1_HUMAN	Q4G148	Glucoside xylosyltransferase 1	2	2	0.143363		0.128827		0	0				11.2977							11.1702
GCFC2_HUMAN	P16383	GC-rich sequence DNA-binding factor 2	3	3	0.143363		0.128827		0	0																																				13.3777	11.2417
CHM4B_HUMAN	Q9H444	Charged multivesicular body protein 4b	2	1	0.0672304		0.0209835		0	++
MUC1_HUMAN	Q9UE75	Mucin-1	3	3	1		0.00176078		0	++
[truncated: 148 more columns]

## Sheet: Table S4- More Sig Protein
	Uniprot Link	REFERENCE	ACCESSION	SHORT_DESC	Depleted_GDM_+d_Flag (GDM/Control)	Depleted_PE_+d_Flag (PE/Control)	Depleted_#TOTAL_PEPTIDES	Depleted_#UNIQUE_PEPTIDES	Depleted_GDM_1d_adjusted_Pval	Depleted_PE_1d_adjusted_Pval	Depleted_GDM_1d_Log2FC	Depleted_PE_1d_Log2FC		Protein_Name	Molecular Function	Biological Process	Ligand	Cellular Component	Disease	Tissue Specificity
385	https://www.uniprot.org/uniprot/P49448	DHE4_HUMAN	P49448	Glutamate dehydrogenase 2, mitochondrial	++	++	3	1	0.0439583	0.0371576	-0.0201821	0.159828		DHE4_HUMAN	Oxidoreductase		NADP	Mitochondrion		Expressed in retina, testis and, at a lower level, brain.
610	https://www.uniprot.org/uniprot/Q92736	RYR2_HUMAN	Q92736	Ryanodine receptor 2	++	0	3	1	0.0233359	0.999999	0.72887	0.00203529		RYR2_HUMAN	Calcium channel, Calmodulin-binding, Developmental protein, Ion channel, Ligand-gated ion channel, Receptor	Calcium transport, Ion transport, Transport	Calcium	Membrane, Sarcoplasmic reticulum	Cardiomyopathy, Disease mutation	Detected in heart muscle (at protein level). Heart muscle, brain (cerebellum and hippocampus) and placenta.
647	https://www.uniprot.org/uniprot/P37840	SYUA_HUMAN	P37840	Alpha-synuclein	++	0	3	2	0.0343955	0.99909	-0.239143	-0.00903894		SYUA_HUMAN			Copper, Metal-binding	Amyloid, Cell junction, Cytoplasm, Membrane, Nucleus, Secreted, Synapse	Alzheimer disease, Disease mutation, Neurodegeneration, Parkinson disease, Parkinsonism	Expressed principally in brain but is also expressed in low concentrations in all tissues examined except in liver. Concentrated in presynaptic nerve terminals.
560	https://www.uniprot.org/uniprot/Q86WI1	PKHL1_HUMAN	Q86WI1	Fibrocystin-L	+	0	3	3	0.00259793	0.439154	2.02996	0.566048		PKHL1_HUMAN	Receptor			Membrane		Ubiquitous. Expressed in spleen and thymus as well as in activated T-cells and B-lymphoblasts.
47	https://www.uniprot.org/uniprot/P15153	RAC2_HUMAN	P15153	Ras-related C3 botulinum toxin substrate 2	+	0	3	1	0.0115491	0.489827	0.838412	0.30698		RAC2_HUMAN			GTP-binding, Nucleotide-binding	Cytoplasm	Disease mutation	Hematopoietic specific.
660	https://www.uniprot.org/uniprot/P52888	THOP1_HUMAN	P52888	Thimet oligopeptidase	+	0	3	3	0.0173994	0.0956918	0.314289	0.216963		THOP1_HUMAN	Hydrolase, Metalloprotease, Protease		Metal-binding, Zinc	Cytoplasm
418	https://www.uniprot.org/uniprot/O95967	FBLN4_HUMAN	O95967	EGF-containing fibulin-like extracellular matrix protein 2	+	+	2	2	0.0436241	0.0301192	0.189865	0.197436		FBLN4_HUMAN			Calcium	Secreted	Disease mutation
445	https://www.uniprot.org/uniprot/P48637	GSHB_HUMAN	P48637	glutathione synthetase	+	0	8	7	0.00281216	0.755744	1.19642	0.1933		GSHB_HUMAN	Ligase	Glutathione biosynthesis	ATP-binding, Magnesium, Metal-binding, Nucleotide-binding		Disease mutation, Hereditary hemolytic anemia
620	https://www.uniprot.org/uniprot/Q8WVM8	SCFD1_HUMAN	Q8WVM8	Sec1 family domain-containing protein 1	+	0	2	2	0.0122467	0.329209	0.349148	0.161794		SCFD1_HUMAN		ER-Golgi transport, Protein transport, Transport		Cytoplasm, Endoplasmic reticulum, Golgi apparatus, Membrane
543	https://www.uniprot.org/uniprot/Q13177	PAK2_HUMAN	Q13177	Serine/threonine-protein kinase PAK 2	+	0	2	1	0.00741676	0.902356	0.776786	0.101063		PAK2_HUMAN	Allosteric enzyme, Kinase, Serine/threonine-protein kinase, Transferase	Apoptosis, Growth regulation, Host-virus interaction	ATP-binding, Nucleotide-binding	Cytoplasm, Membrane, Nucleus		Ubiquitously expressed. Higher levels seen in skeletal muscle, ovary, thymus and spleen.
473	https://www.uniprot.org/uniprot/P27930	IL1R2_HUMAN	P27930	Interleukin-1 receptor type 2	+	0	2	2	0.0224526	0.861575	0.280157	0.0527014		IL1R2_HUMAN	Receptor			Cell membrane, Membrane, Secreted
457	https://www.uniprot.org/uniprot/P08238	HS90B_HUMAN	P08238	Heat shock protein HSP 90-beta	+	0	15	1	0.0131122	0.9666	0.364499	0.0289732		HS90B_HUMAN	Chaperone	Stress response	ATP-binding, Nucleotide-binding	Cell membrane, Cytoplasm, Membrane, Nucleus, Secreted
580	https://www.uniprot.org/uniprot/P28062	PSB8_HUMAN	P28062	Proteasome subunit beta type-8	+	0	3	3	0.0383871	0.997558	0.417273	0.0100575		PSB8_HUMAN	Hydrolase, Protease, Threonine protease	Differentiation, Host-virus interaction, Immunity		Cytoplasm, Nucleus, Proteasome	Disease mutation
631	https://www.uniprot.org/uniprot/Q9UNH7	SNX6_HUMAN	Q9UNH7	Sorting nexin-6	+	0	2	2	0.00901031	0.942185	0.713663	-0.0765131		SNX6_HUMAN		Protein transport, Transport	Lipid-binding	Cytoplasm, Cytoplasmic vesicle, Endosome, Membrane, Nucleus
494	https://www.uniprot.org/uniprot/Q12907	LMAN2_HUMAN	Q12907	Vesicular integral-membrane protein VIP36	+	0	4	4	0.0116823	0.87084	1.26788	-0.113802		LMAN2_HUMAN		Protein transport, Transport	Calcium, Lectin, Metal-binding	Endoplasmic reticulum, Golgi apparatus, Membrane		Ubiquitous.
593	https://www.uniprot.org/uniprot/P20742	PZP_HUMAN	P20742	Pregnancy zone protein	+	0	150	129	0.0140328	0.843254	0.689068	-0.124917		PZP_HUMAN	Protease inhibitor, Serine protease inhibitor			Secreted		Plasma. Prominent constituent of late-pregnancy sera.
284	https://www.uniprot.org/uniprot/Q86UQ4	ABCAD_HUMAN	Q86UQ4	ATP-binding cassette sub-family A member 13	+	--	2	2	0.0170456	0.00129044	0.354712	-0.1434		ABCAD_HUMAN		Transport	ATP-binding, Nucleotide-binding	Membrane		Significantly expressed in the bone marrow, trachea, testis, thyroid and lung as well as in skin fibroblasts.
597	https://www.uniprot.org/uniprot/O95980	RECK_HUMAN	O95980	Reversion-inducing cysteine-rich protein with Kazal motifs	+	0	3	3	0.0143479	0.893237	2.71784	-0.389723		RECK_HUMAN	Protease inhibitor, Serine protease inhibitor			Cell membrane, Membrane	Tumor suppressor	Expressed in various tissues and untransformed cells. It is undetectable in tumor-derived cell lines and oncogenically transformed cells.
500	https://www.uniprot.org/uniprot/P10253	LYAG_HUMAN	P10253	Lysosomal alpha-glucosidase	--	0	2	1	0.0215694	0.119179	-0.497108	0.416568		LYAG_HUMAN	Glycosidase, Hydrolase			Lysosome, Membrane	Disease mutation, Glycogen storage disease
20	https://www.uniprot.org/uniprot/Q16394	EXT1_HUMAN	Q16394	Exostosin-1	--	0	2	2	0.00773878	0.427401		0.289136		EXT1_HUMAN	Glycosyltransferase, Transferase		Manganese, Metal-binding	Endoplasmic reticulum, Golgi apparatus, Membrane	Disease mutation, Hereditary multiple exostoses, Tumor suppressor	Ubiquitous.
492	https://www.uniprot.org/uniprot/Q01650	LAT1_HUMAN	Q01650	Large neutral amino acids transporter small subunit 1	--	0	2	2	0.0181527	0.284446	0.297822	0.227408		LAT1_HUMAN	Developmental protein	Amino-acid transport, Differentiation, Neurogenesis, Transport		Cell membrane, Cytoplasm, Membrane		Expressed abundantly in adult lung, liver, brain, skeletal muscle, placenta, bone marrow, testis, resting lymphocytes and monocytes, and in fetal liver. Weaker expression in thymus, cornea, retina, peripheral leukocytes, spleen, kidney, colon and lymph node. During gestation, expression in the placenta was significantly stronger at full-term than at the mid-trimester stage. Also expressed in all …
680	https://www.uniprot.org/uniprot/P15822	ZEP1_HUMAN	P15822	Zinc finger protein 40	--	0	3	3	0.0458037	0.133309	0.216879	0.205836		ZEP1_HUMAN	Activator, DNA-binding	Transcription, Transcription regulation	Metal-binding, Zinc	Cytoplasm, Nucleus
427	https://www.uniprot.org/uniprot/O75369	FLNB_HUMAN	O75369	Filamin-B	--	--	5	1	0.0136708	0.0473551	-0.397835	0.196313		FLNB_HUMAN	Actin-binding, Developmental protein	Differentiation, Myogenesis		Cytoplasm, Cytoskeleton	Disease mutation, Dwarfism	Ubiquitous. Isoform 1 and isoform 2 are expressed in placenta, bone marrow, brain, umbilical vein endothelial cells (HUVEC), retina and skeletal muscle. Isoform 1 is predominantly expressed in prostate, uterus, liver, thyroid, stomach, lymph node, small intestine, spleen, skeletal muscle, kidney, placenta, pancreas, heart, lung, platelets, endothelial cells, megakaryocytic and erythroleukemic cel…
548	https://www.uniprot.org/uniprot/Q15084	PDIA6_HUMAN	Q15084	Protein disulfide-isomerase A6	--	0	4	4	0.00815079	0.53068	0.0252059	0.0957324		PDIA6_HUMAN	Chaperone, Isomerase			Cell membrane, Endoplasmic reticulum, Membrane		Expressed in platelets (at protein level).
562	https://www.uniprot.org/uniprot/Q02809	PLOD1_HUMAN	Q02809	Procollagen-lysine,2-oxoglutarate 5-dioxygenase 1	--	--	3	3	0.0482686	0.000465625	-0.00665863	0.0593562		PLOD1_HUMAN	Dioxygenase, Oxidoreductase		Iron, Metal-binding, Vitamin C	Endoplasmic reticulum, Membrane	Disease mutation, Ehlers-Danlos syndrome
450	https://www.uniprot.org/uniprot/P14317	HCLS1_HUMAN	P14317	Hematopoietic lineage cell-specific protein	--	--	3	3	0.00137274	0.00176078	-0.0840814	0.0172446		HCLS1_HUMAN				Cytoplasm, Membrane, Mitochondrion		Expressed only in tissues and cells of hematopoietic origin.
591	https://www.uniprot.org/uniprot/Q15262	PTPRK_HUMAN	Q15262	Receptor-type tyrosine-protein phosphatase kappa	--	0	3	3	0.00576825	0.997856	-0.0333826	0.00491773		PTPRK_HUMAN	Hydrolase, Protein phosphatase, Receptor			Cell junction, Cell membrane, Membrane		High levels in lung, brain and colon; less in liver, pancreas, stomach, kidney, placenta and mammary carcinoma.
547	https://www.uniprot.org/uniprot/Q14554	PDIA5_HUMAN	Q14554	Protein disulfide-isomerase A5	--	0	3	3	0.0343955	0.999562	-0.0223836	0.00194656		PDIA5_HUMAN	Isomerase			Endoplasmic reticulum
515	https://www.uniprot.org/uniprot/P14174	MIF_HUMAN	P14174	Macrophage migration inhibitory factor	--	0	4	4	0.021291	0.993337	-0.276224	-0.0131642		MIF_HUMAN	Cytokine, Isomerase	Immunity, Inflammatory response, Innate immunity		Cytoplasm, Secreted
324	https://www.uniprot.org/uniprot/O43505	B4GA1_HUMAN	O43505	Beta-1,4-glucuronyltransferase 1	--	0	5	5	0.0206392	0.994146	-0.34671	-0.0200401		B4GA1_HUMAN	Glycosyltransferase, Transferase		Manganese, Metal-binding	Golgi apparatus, Membrane	Congenital muscular dystrophy, Disease mutation, Dystroglycanopathy, Lissencephaly	In the adult, highly expressed in heart, brain, skeletal muscle and kidney and to a lesser extent in placenta, pancreas, spleen, prostate, testis, ovary, small intestine and colon. Very weak expression in lung, liver, thymus and peripheral blood leukocytes. In fetal highly expressed in brain and kidney and to a lesser extent in lung and liver.
545	https://www.uniprot.org/uniprot/Q9HBI1	PARVB_HUMAN	Q9HBI1	Beta-parvin	--	0	7	7	0.00169643	0.988443	-0.351263	-0.0204337		PARVB_HUMAN	Actin-binding	Cell adhesion		Cell junction, Cell membrane, Cell projection, Cytoplasm, Cytoskeleton, Membrane		Expressed predominantly in heart and skeletal muscle
411	https://www.uniprot.org/uniprot/Q9UFP1	F198A_HUMAN	Q9UFP1	Protein FAM198A	--	0	4	4	0.0305867	0.980199	-0.120994	-0.0352483		F198A_HUMAN				Secreted
549	https://www.uniprot.org/uniprot/P30086	PEBP1_HUMAN	P30086	Phosphatidylethanolamine-binding protein 1	--	0	6	6	0.00249774	0.821932	-0.126715	-0.0591723		PEBP1_HUMAN	Protease inhibitor, Serine protease inhibitor		ATP-binding, Lipid-binding, Nucleotide-binding	Cytoplasm
333	https://www.uniprot.org/uniprot/P55287	CAD11_HUMAN	P55287	Cadherin-11	--	0	3	3	0.014765	0.835363	-0.00532346	-0.0616007		CAD11_HUMAN		Cell adhesion	Calcium, Metal-binding	Cell membrane, Membrane	Deafness, Disease mutation, Mental retardation	Expressed mainly in brain but also found in other tissues. Expressed in neuroblasts.
490	https://www.uniprot.org/uniprot/P10721	KIT_HUMAN	P10721	Mast/stem cell growth factor receptor Kit	--	0	2	2	0.0180454	0.554404	-0.00751461	-0.0735427		KIT_HUMAN	Kinase, Receptor, Transferase, Tyrosine-protein kinase		ATP-binding, Magnesium, Metal-binding, Nucleotide-binding	Cell membrane, Cytoplasm, Membrane	Disease mutation, Proto-oncogene	Isoform 1 and isoform 2 are detected in spermatogonia and Leydig cells. Isoform 3 is detected in round spermatids, elongating spermatids and spermatozoa (at protein level). Widely expressed. Detected in the hematopoietic system, the gastrointestinal system, in melanocytes and in germ cells.
671	https://www.uniprot.org/uniprot/P19320	VCAM1_HUMAN	P19320	Vascular cell adhesion protein 1	--	0	17	17	0.000102715	0.475089	-0.0978875	-0.0813647		VCAM1_HUMAN		Cell adhesion		Membrane		Expressed on inflammed vascular endothelium, as well as on macrophage-like and dendritic cell types in both normal and inflammed tissue.
335	https://www.uniprot.org/uniprot/P53634	CATC_HUMAN	P53634	Dipeptidyl peptidase 1	--	0	3	3	0.0319697	0.773827	-0.113359	-0.0876966		CATC_HUMAN	Hydrolase, Protease, Thiol protease		Chloride	Lysosome	Disease mutation, Palmoplantar keratoderma	Ubiquitous. Highly expressed in lung, kidney and placenta. Detected at intermediate levels in colon, small intestine, spleen and pancreas.
505	https://www.uniprot.org/uniprot/Q15555	MARE2_HUMAN	Q15555	Microtubule-associated protein RP/EB family member 2	--	0	7	6	0.0134603	0.558926	-0.0372271	-0.102902		MARE2_HUMAN		Cell cycle, Cell division, Mitosis		Cytoplasm, Cytoskeleton, Microtubule		Expressed in different tumor cell lines. Up-regulated in activated B- and T-lymphocytes.
325	https://www.uniprot.org/uniprot/P15291	B4GT1_HUMAN	P15291	Beta-1,4-galactosyltransferase 1	--	0	2	2	0.0254356	0.849556	-0.086971	-0.110543		B4GT1_HUMAN	Glycosyltransferase, Transferase		Manganese, Metal-binding	Cell membrane, Cell projection, Golgi apparatus, Membrane, Secreted	Congenital disorder of glycosylation	Ubiquitously expressed, but at very low levels in fetal and adult brain.
448	https://www.uniprot.org/uniprot/Q68CZ6	HAUS3_HUMAN	Q68CZ6	HAUS augmin-like complex subunit 3	--	0	2	2	0.0103641	0.737091	-0.0276613	-0.119182		HAUS3_HUMAN		Cell cycle, Cell division, Mitosis		Cytoplasm, Cytoskeleton, Microtubule
363	https://www.uniprot.org/uniprot/P12110	CO6A2_HUMAN	P12110	Collagen alpha-2(VI) chain	--	0	3	3	0.00439109	0.55393	-0.252453	-0.121358		CO6A2_HUMAN		Cell adhesion		Extracellular matrix, Membrane, Secreted	Congenital muscular dystrophy, Disease mutation
43	https://www.uniprot.org/uniprot/Q06830	PRDX1_HUMAN	Q06830	Peroxiredoxin-1	--	--	8	5	0.0180454	0.00176078	0.0443628	-0.141681		PRDX1_HUMAN	Antioxidant, Oxidoreductase, Peroxidase			Cytoplasm
641	https://www.uniprot.org/uniprot/P16949	STMN1_HUMAN	P16949	Stathmin	--	0	3	2	0.041502	0.291561	-0.0223111	-0.148639		STMN1_HUMAN	Developmental protein	Differentiation, Neurogenesis		Cytoplasm, Cytoskeleton, Microtubule		Ubiquitous. Expression is strongest in fetal and adult brain, spinal cord, and cerebellum, followed by thymus, bone marrow, testis, and fetal liver. Expression is intermediate in colon, ovary, placenta, uterus, and trachea, and is readily detected at substantially lower levels in all other tissues examined. Lowest expression is found in adult liver. Present in much greater abundance in cells from…
497	https://www.uniprot.org/uniprot/Q14766	LTBP1_HUMAN	Q14766	Latent-transforming growth factor beta-binding protein 1	--	-	5	5	0.0215641	0.02624	-0.00847068	-0.161559		LTBP1_HUMAN	Growth factor binding			Extracellular matrix, Secreted		Expressed in the aorta (at protein level) (PubMed:17293099). Isoform Long: Expressed in fibroblasts (PubMed:17293099).
405	https://www.uniprot.org/uniprot/Q6P179	ERAP2_HUMAN	Q6P179	Endoplasmic reticulum aminopeptidase 2	--	0	7	6	0.0416363	0.172728	-0.0385862	-0.26645		ERAP2_HUMAN	Aminopeptidase, Hydrolase, Metalloprotease, Protease	Adaptive immunity, Immunity	Metal-binding, Zinc	Endoplasmic reticulum, Membrane		Ubiquitously expressed. Highly expressed in spleen and leukocytes
52	https://www.uniprot.org/uniprot/A6NMB1	SIG16_HUMAN	A6NMB1	Sialic acid-binding Ig-like lectin 16	--	0	2	2	0.0107622	0.370077	-0.0469863	-0.272469		SIG16_HUMAN		Cell adhesion	Lectin	Membrane		Expressed in bone marrow, fetal brain, fetal liver, lung and salivary gland. Detected in brain, macrophage, cancerous esophagus and lung at protein level.
409	https://www.uniprot.org/uniprot/P10768	ESTD_HUMAN	P10768	S-formylglutathione hydrolase	--	0	5	5	0.00398318	0.704125	-0.424863	-0.286156		ESTD_HUMAN	Hydrolase, Serine esterase			Cytoplasm, Cytoplasmic vesicle
600	https://www.uniprot.org/uniprot/Q07960	RHG01_HUMAN	Q07960	Rho GTPase-activating protein 1	--	0	9	9	0.0180454	0.45221	-0.338802	-0.303582		RHG01_HUMAN	GTPase activation			Cytoplasm		Ubiquitous.
376	https://www.uniprot.org/uniprot/P13611	CSPG2_HUMAN	P13611	Versican core protein	--	0	4	4	0.030557	0.178645	-0.534878	-0.353374		CSPG2_HUMAN			Calcium, Hyaluronic acid, Lectin	Extracellular matrix, Secreted	Cataract	Cerebral white matter and plasma. Isoform V0 and isoform V1 are expressed in normal brain, gliomas, medulloblastomas, schwannomas, neurofibromas, and meningiomas. Isoform V2 is restricted to normal brain and gliomas. Isoform V3 is found in all these tissues except medulloblastomas.
640	https://www.uniprot.org/uniprot/Q9NY15	STAB1_HUMAN	Q9NY15	Stabilin-1	--	--	2	2	0.0202668	0.0165933				STAB1_HUMAN	Receptor	Inflammatory response		Membrane		High levels found in spleen, lymph node, liver and placenta. Also expressed in endothelial cells.
6	https://www.uniprot.org/uniprot/P02649	APOE_HUMAN	P02649	Apolipoprotein E	-	0	51	50	0.0139342	0.809115	-0.386034	0.0780941		APOE_HUMAN	Heparin-binding	Cholesterol metabolism, Lipid metabolism, Lipid transport, Steroid metabolism, Sterol metabolism, Transport		Chylomicron, HDL, Secreted, VLDL	Alzheimer disease, Amyloidosis, Disease mutation, Hyperlipidemia, Neurodegeneration	Occurs in all lipoprotein fractions in plasma. It constitutes 10-20% of very low density lipoproteins (VLDL) and 1-2% of high density lipoproteins (HDL). APOE is produced in most organs. Significant quantities are produced in liver, brain, spleen, lung, adrenal, ovary, kidney and muscle.
565	https://www.uniprot.org/uniprot/P13797	PLST_HUMAN	P13797	Plastin-3	-	0	7	1	0.0227239	0.99998	-0.297208	-0.000619838		PLST_HUMAN	Actin-binding		Calcium, Metal-binding	Cytoplasm	Disease mutation	Expressed in a variety of organs, including muscle, brain, uterus and esophagus.
451	https://www.uniprot.org/uniprot/Q9ULI3	HEG1_HUMAN	Q9ULI3	Protein HEG homolog 1	-	0	6	6	0.00949178	0.997612	-0.661902	-0.012036		HEG1_HUMAN	Developmental protein		Calcium	Cell junction, Cell membrane, Membrane, Secreted
1	https://www.uniprot.org/uniprot/P04217	A1BG_HUMAN	P04217	Alpha-1B-glycoprotein	-	0	57	57	7.25567e-05	0.906642	-0.205811	-0.0181084		A1BG_HUMAN				Secreted		Plasma.
607	https://www.uniprot.org/uniprot/P34096	RNAS4_HUMAN	P34096	Ribonuclease 4	-	0	4	4	0.0357595	0.945129	-0.254698	-0.0302809		RNAS4_HUMAN	Endonuclease, Hydrolase, Nuclease			Secreted
419	https://www.uniprot.org/uniprot/Q53RD9	FBLN7_HUMAN	Q53RD9	Fibulin-7	-	0	2	2	0.00413439	0.944996	-0.427874	-0.0384798		FBLN7_HUMAN	Heparin-binding	Cell adhesion	Calcium	Extracellular matrix, Secreted
412	https://www.uniprot.org/uniprot/P00742	FA10_HUMAN	P00742	Coagulation factor X	-	0	35	32	0.0018429	0.507744	-0.178148	-0.0528236		FA10_HUMAN	Hydrolase, Protease, Serine protease	Blood coagulation, Hemostasis	Calcium	Secreted	Disease mutation	Plasma; synthesized in the liver.
652	https://www.uniprot.org/uniprot/Q01995	TAGL_HUMAN	Q01995	Transgelin	-	0	11	11	0.0306388	0.724459	-0.193896	-0.0542452		TAGL_HUMAN	Actin-binding, Muscle protein			Cytoplasm
592	https://www.uniprot.org/uniprot/P31939	PUR9_HUMAN	P31939	Bifunctional purine biosynthesis protein PURH	-	0	3	3	0.00327958	0.703195	-0.31223	-0.0662122		PUR9_HUMAN	Hydrolase, Multifunctional enzyme, Transferase	Purine biosynthesis			Disease mutation, Epilepsy
305	https://www.uniprot.org/uniprot/P09525	ANXA4_HUMAN	P09525	Annexin A4	-	0	10	9	0.0209666	0.506633	-0.191019	-0.0746096		ANXA4_HUMAN			Calcium, Calcium/phospholipid-binding
8	https://www.uniprot.org/uniprot/O95445	APOM_HUMAN	O95445	Apolipoprotein M	-	0	10	10	0.0189717	0.624936	-0.285294	-0.0895541		APOM_HUMAN		Lipid transport, Transport		HDL, Secreted		Plasma protein. Expressed in liver and kidney.
4	https://www.uniprot.org/uniprot/P04114	APOB_HUMAN	P04114	Apolipoprotein B-100	-	0	629	624	0.00146033	0.409745	-0.33004	-0.110669		APOB_HUMAN	Heparin-binding	Cholesterol metabolism, Lipid metabolism, Lipid transport, Steroid metabolism, Sterol metabolism, Transport		Chylomicron, Cytoplasm, LDL, Secreted, VLDL	Atherosclerosis, Disease mutation
452	https://www.uniprot.org/uniprot/P13716	HEM2_HUMAN	P13716	Delta-aminolevulinic acid dehydratase	-	0	7	7	0.0440652	0.196579	-0.162397	-0.111877		HEM2_HUMAN	Allosteric enzyme, Lyase	Heme biosynthesis, Porphyrin biosynthesis	Metal-binding, Zinc		Disease mutation
15	https://www.uniprot.org/uniprot/P10643	CO7_HUMAN	P10643	Complement component C7	-	0	77	76	0.00540243	0.53861	-0.364114	-0.114158		CO7_HUMAN		Complement alternate pathway, Complement pathway, Cytolysis, Immunity, Innate immunity		Membrane attack complex, Secreted	Disease mutation
44	https://www.uniprot.org/uniprot/Q92954	PRG4_HUMAN	Q92954	Proteoglycan 4	-	0	30	29	0.000905837	0.291692	-0.323844	-0.122759		PRG4_HUMAN				Secreted		Highly expressed in synovial tissue, cartilage and liver and weakly in heart and lung. Isoform B is expressed in kidney, lung, liver, heart and brain. Isoform C and isoform D are widely expressed.
576	https://www.uniprot.org/uniprot/P30041	PRDX6_HUMAN	P30041	Peroxiredoxin-6	-	0	7	7	3.89243e-05	0.298025	-0.480335	-0.146136		PRDX6_HUMAN	Antioxidant, Hydrolase, Multifunctional enzyme, Oxidoreductase, Peroxidase	Lipid degradation, Lipid metabolism		Cytoplasm, Lysosome
56	https://www.uniprot.org/uniprot/P35916	VGFR3_HUMAN	P35916	Vascular endothelial growth factor receptor 3	-	0	15	15	0.037905	0.0748092	-0.196261	-0.171688		VGFR3_HUMAN	Kinase, Receptor, Transferase, Tyrosine-protein kinase	Angiogenesis	ATP-binding, Nucleotide-binding	Cell membrane, Cytoplasm, Membrane, Nucleus, Secreted	Disease mutation	Detected in endothelial cells (at protein level). Widely expressed. Detected in fetal spleen, lung and brain. Detected in adult liver, muscle, thymus, placenta, lung, testis, ovary, prostate, heart, and kidney.
658	https://www.uniprot.org/uniprot/P40227	TCPZ_HUMAN	P40227	T-complex protein 1 subunit zeta	-	0	2	2	0.0080478	0.391889	-0.483157	-0.19878		TCPZ_HUMAN	Chaperone		ATP-binding, Nucleotide-binding	Cytoplasm
[truncated: 159 more rows]

## Sheet: Table S5- Lipidomics
Lipid	# of Carbons	# DB	Ionization Mode	GDM v Ctrl Adjusted Pval	GDM v Ctrl Log2FC	PRE v Ctrl Adjusted Pval	PRE v Ctrl Log2FC	Flag GDM v Ctrl	Flag PRE v Ctrl	TAM_C_106	TAM_C_109	TAM_C_10	TAM_C_111	TAM_C_116	TAM_C_120	TAM_C_123	TAM_C_124	TAM_C_125	TAM_C_127	TAM_C_129	TAM_C_139	TAM_C_13	TAM_C_150	TAM_C_158	TAM_C_15	TAM_C_172	TAM_C_173	TAM_C_187	TAM_C_188	TAM_C_18	TAM_C_202	TAM_C_203	TAM_C_216	TAM_C_21	TAM_C_223	TAM_C_224	TAM_C_228	TAM_C_233	TAM_C_243	TAM_C_244	TAM_C_263	TAM_C_265	TAM_C_28	TAM_C_2	TAM_C_307	TAM_C_318	TAM_C_332	TAM_C_340	TAM_C_36
[truncated: 320 more rows]
[truncated: 146 more columns]

[truncated: 1 more sheets: Table S6- GDM vs. PRE test]
